# Supplementary material for: Integrative modeling of seasonal influenza evolution via AI-powered antigenic cartography
Source: bioRxiv preprint, doi:10.1101/2025.08.04.668423, version 2 (2025-08-05)
Supplement: Table S1 [file 668423_file12.xlsx]

## Sheet: PLANT_epiflu_human_241212_with_
Table S1. Information on virus strains used in this study.
Isolate name	ID	Isolate Id	Location	Host	Collection date	HA1 length	Clade	Subclade	Coord X	Coord Y	Coord Z	Antigenic cluster	Season	Distance from season centroid	is WHO vaccine strain	Closest vaccine strain	Distance from closest vaccine strain	Season matched vaccine strain	Distance from season matched vaccine strain
A/Hong Kong/1/68	EPI144950	EPI_ISL_151	Asia / Hong Kong (SAR)	Human	1968	329	unassigned	unassigned	4.98828	-7.99219	5.55859	c1	1967NH	0.720727	NA	NA	NA	NA	NA
A/Aichi/2/1968	EPI131276	EPI_ISL_236	Asia / Singapore	Human	1968	329	unassigned	unassigned	5.49219	-8.20312	6.11719	c1	1967NH	0.100587	NA	NA	NA	NA	NA
A/Bilthoven/16190/1968	EPI545274	EPI_ISL_167237	Europe / Netherlands	Human	1968	329	unassigned	unassigned	5.45312	-8.25	6.0625	c1	1967NH	0.0370803	NA	NA	NA	NA	NA
A/Hong Kong/1-10-MA21-3/1968	EPI240923	EPI_ISL_69271	Asia / Hong Kong (SAR)	Human	1968	329	unassigned	unassigned	5.51562	-8.22656	6.14062	c1	1967NH	0.1217	NA	NA	NA	NA	NA
A/Hong Kong/1-6-MA21-1/1968	EPI240939	EPI_ISL_69273	Asia / Hong Kong (SAR)	Human	1968	329	unassigned	unassigned	5.50391	-8.14844	6.21094	c1	1967NH	0.209337	NA	NA	NA	NA	NA
A/Hong Kong/1-1-MA-20/1968	EPI240915	EPI_ISL_69270	Asia / Hong Kong (SAR)	Human	1968	329	unassigned	unassigned	5.51172	-8.1875	6.16797	c1	1967NH	0.156387	NA	NA	NA	NA	NA
A/Hong Kong/1-5-MA21-3/1968	EPI240931	EPI_ISL_69272	Asia / Hong Kong (SAR)	Human	1968	329	unassigned	unassigned	5.50391	-8.14844	6.21094	c1	1967NH	0.209337	NA	NA	NA	NA	NA
A/Hong Kong/1/1968	EPI240947	EPI_ISL_69274	Asia / Hong Kong (SAR)	Human	1968	329	unassigned	unassigned	5.49609	-8.20312	6.12109	c1	1967NH	0.104897	NA	NA	NA	NA	NA
A/Hong Kong/68	EPI240955	EPI_ISL_69275	Asia / Hong Kong (SAR)	Human	1968	329	unassigned	unassigned	5.55859	-8.24219	5.90625	c1	1967NH	0.151902	NA	NA	NA	NA	NA
A/Bilthoven/16398/68	EPI23760	EPI_ISL_4207	Europe / Netherlands / Provincie Utrecht / Gemeente De Bilt / Bilthoven	Human	1968	329	unassigned	unassigned	5.45312	-8.25	6.0625	c1	1967NH	0.0370803	NA	NA	NA	NA	NA
A/Hong Kong/1-1-MA-20C/1968	EPI241839	EPI_ISL_69769	Asia / Hong Kong (SAR)	Human	1968	329	unassigned	unassigned	5.51172	-8.1875	6.16797	c1	1967NH	0.156387	NA	NA	NA	NA	NA
A/Hong Kong/1-6-MA21-3/1968	EPI241855	EPI_ISL_69771	Asia / Hong Kong (SAR)	Human	1968	329	unassigned	unassigned	5.50391	-8.14844	6.21094	c1	1967NH	0.209337	NA	NA	NA	NA	NA
A/Hong Kong/1-5-MA21-1/1968	EPI241847	EPI_ISL_69770	Asia / Hong Kong (SAR)	Human	1968	329	unassigned	unassigned	5.50391	-8.14844	6.21094	c1	1967NH	0.209337	NA	NA	NA	NA	NA
A/Bilthoven/15793/68	EPI23854	EPI_ISL_4252	Europe / Netherlands / Provincie Utrecht / Gemeente De Bilt / Bilthoven	Human	1968	329	unassigned	unassigned	5.45312	-8.22656	6.02734	c1	1967NH	0.0272269	NA	NA	NA	NA	NA
A/Bilthoven/16190/68	EPI23856	EPI_ISL_4253	Europe / Netherlands / Provincie Utrecht / Gemeente De Bilt / Bilthoven	Human	1968	329	unassigned	unassigned	5.45312	-8.25	6.0625	c1	1967NH	0.0370803	NA	NA	NA	NA	NA
A/Victoria/1968	EPI242065	EPI_ISL_69818	Oceania / Australia / Victoria	Human	1968	329	unassigned	unassigned	5.03125	-10.3438	2.00391	c1	1967NH	4.55998	NA	NA	NA	NA	NA
A/Northern Territory/60/1968	EPI33857	EPI_ISL_5352	Oceania / Australia / Northern Territory	Human	1968	329	unassigned	unassigned	5.44531	-8.21875	6.14844	c1	1967NH	0.124722	NA	NA	NA	NA	NA
A/Albany/11/1968	EPI56866	EPI_ISL_6847	North America / United States / New York	Human	1968	329	unassigned	unassigned	5.45703	-8.21094	6.12109	c1	1967NH	0.0993707	NA	NA	NA	NA	NA
A/Albany/19/1968	EPI56904	EPI_ISL_6849	North America / United States / New York	Human	1968	329	unassigned	unassigned	5.45703	-8.25	6.06641	c1	1967NH	0.039092	NA	NA	NA	NA	NA
A/Albany/18/1968	EPI58353	EPI_ISL_6911	North America / United States / New York	Human	1968	329	unassigned	unassigned	5.45703	-8.21094	6.12109	c1	1967NH	0.0993707	NA	NA	NA	NA	NA
A/Albany/17/1968	EPI59702	EPI_ISL_6981	North America / United States / New York	Human	1968	329	unassigned	unassigned	5.45312	-8.20312	6.125	c1	1967NH	0.106567	NA	NA	NA	NA	NA
A/Albany/10/1968	EPI61422	EPI_ISL_7066	North America / United States / New York	Human	1968	329	unassigned	unassigned	5.45703	-8.21094	6.12109	c1	1967NH	0.0993707	NA	NA	NA	NA	NA
A/Albany/6/1968	EPI61934	EPI_ISL_7092	North America / United States / New York	Human	1968	329	unassigned	unassigned	5.45703	-8.21094	6.12109	c1	1967NH	0.0993707	NA	NA	NA	NA	NA
A/Memphis/1/1968	EPI90801	EPI_ISL_8973	North America / United States / Tennessee	Human	1968	329	unassigned	unassigned	5.45312	-8.25	6.0625	c1	1967NH	0.0370803	NA	NA	NA	NA	NA
A/Beijing/1/68	EPI95383	EPI_ISL_9214	Asia / China	Human	1968	329	unassigned	unassigned	5.49609	-8.20312	6.12109	c1	1967NH	0.104897	NA	NA	NA	NA	NA
A/Aichi/2-MA/1968	EPI449150	EPI_ISL_141507	Asia / Japan	Human	1968	329	unassigned	unassigned	5.5	-8.17188	6.11328	c1	1967NH	0.116665	NA	NA	NA	NA	NA
A/Victoria/JY2/1968	EPI459338	EPI_ISL_143165	Oceania / Australia / Victoria	Human	1968	329	unassigned	unassigned	5.03125	-10.3438	2.00391	c1	1967NH	4.55998	NA	NA	NA	NA	NA
A/Bilthoven/15793/1968	EPI362372	EPI_ISL_110734	Europe / Netherlands	Human	1968	329	unassigned	unassigned	5.45312	-8.22656	6.02734	c1	1967NH	0.0272269	NA	NA	NA	NA	NA
A/Bilthoven/16398/1968	EPI362379	EPI_ISL_110745	Europe / Netherlands	Human	1968	329	unassigned	unassigned	5.45312	-8.25	6.0625	c1	1967NH	0.0370803	NA	NA	NA	NA	NA
A/Hong Kong/001/1968	EPI2595399	EPI_ISL_17805317	Asia / Hong Kong (SAR)	Human	1968-01-01	329	unassigned	unassigned	5.45312	-8.25	6.0625	c1	1967NH	0.0370803	NA	NA	NA	NA	NA
A/Alchi/2/1968	EPI889148	EPI_ISL_243350	Asia / Japan	Human	1968	329	unassigned	unassigned	5.5	-8.17188	6.11328	c1	1967NH	0.116665	NA	NA	NA	NA	NA
A/Hong Kong/1-5-MA21-3/1968	EPI281158	EPI_ISL_79839	Asia / Hong Kong (SAR)	Human	1968	329	unassigned	unassigned	5.50391	-8.14844	6.21094	c1	1967NH	0.209337	NA	NA	NA	NA	NA
A/Hong Kong/1-6-MA21-1/1968	EPI281157	EPI_ISL_79838	Asia / Hong Kong (SAR)	Human	1968	329	unassigned	unassigned	5.50391	-8.14844	6.21094	c1	1967NH	0.209337	NA	NA	NA	NA	NA
A/Hong Kong/1-4-MA21-1/1968	EPI281160	EPI_ISL_79841	Asia / Hong Kong (SAR)	Human	1968	329	unassigned	unassigned	5.50391	-8.14844	6.21094	c1	1967NH	0.209337	NA	NA	NA	NA	NA
A/Hong Kong/1-5-MA21-1/1968	EPI281159	EPI_ISL_79840	Asia / Hong Kong (SAR)	Human	1968	329	unassigned	unassigned	5.50391	-8.14844	6.21094	c1	1967NH	0.209337	NA	NA	NA	NA	NA
A/Hong Kong/1-2-MA21-2/1968	EPI281162	EPI_ISL_79843	Asia / Hong Kong (SAR)	Human	1968	329	unassigned	unassigned	5.49219	-8.19531	6.13672	c1	1967NH	0.121134	NA	NA	NA	NA	NA
A/Hong Kong/1-2-MA21-3/1968	EPI281161	EPI_ISL_79842	Asia / Hong Kong (SAR)	Human	1968	329	unassigned	unassigned	5.51953	-8.21875	6.0625	c1	1967NH	0.0658819	NA	NA	NA	NA	NA
A/Hong Kong/1-10-MA21-2/1968	EPI281164	EPI_ISL_79845	Asia / Hong Kong (SAR)	Human	1968	329	unassigned	unassigned	5.35938	-8.30469	5.98047	c1	1967NH	0.134047	NA	NA	NA	NA	NA
A/Hong Kong/1-10-MA21-1/1968	EPI281163	EPI_ISL_79844	Asia / Hong Kong (SAR)	Human	1968	329	unassigned	unassigned	5.51562	-8.17969	6.18359	c1	1967NH	0.174247	NA	NA	NA	NA	NA
A/Hong Kong/MA/1968	EPI281166	EPI_ISL_79847	Asia / Hong Kong (SAR)	Human	1968	329	unassigned	unassigned	5.51172	-8.1875	6.16797	c1	1967NH	0.156387	NA	NA	NA	NA	NA
A/Hong Kong/1-10-MA21-3/1968	EPI281165	EPI_ISL_79846	Asia / Hong Kong (SAR)	Human	1968	329	unassigned	unassigned	5.51562	-8.22656	6.14062	c1	1967NH	0.1217	NA	NA	NA	NA	NA
A/Aichi/2-1/1968	EPI471127	EPI_ISL_146765	Asia / Japan / Aichi	Human	1968	329	unassigned	unassigned	5.50391	-8.29688	6.02734	c1	1967NH	0.0597171	NA	NA	NA	NA	NA
A/Hong Kong/JY2/1968	EPI472272	EPI_ISL_147171	Asia / Hong Kong (SAR)	Human	1968	329	unassigned	unassigned	5.49219	-8.20312	6.11719	c1	1967NH	0.100587	NA	NA	NA	NA	NA
A/Northern Territories/60-JY2/1968	EPI472280	EPI_ISL_147172	Oceania / Australia	Human	1968	329	unassigned	unassigned	5.44141	-8.23438	6.11328	c1	1967NH	0.0894094	NA	NA	NA	NA	NA
A/Hong Kong/01/1968	EPI901058	EPI_ISL_245769	Asia / China	Human	1968	329	unassigned	unassigned	5.49609	-8.20312	6.12109	c1	1967NH	0.104897	NA	NA	NA	NA	NA
A/Hong Kong/01/1968	EPI901851	EPI_ISL_246097	Asia / China	Human	1968	329	unassigned	unassigned	5.53125	-8.19531	6.16016	c1	1967NH	0.153235	NA	NA	NA	NA	NA
A/Hong Kong/1-1-MA-20B/1968	EPI156289	EPI_ISL_20813	Asia / Hong Kong (SAR)	Human	1968	329	unassigned	unassigned	5.51172	-8.1875	6.16797	c1	1967NH	0.156387	NA	NA	NA	NA	NA
A/Hong Kong/1-1/1968	EPI156305	EPI_ISL_20815	Asia / Hong Kong (SAR)	Human	1968	329	unassigned	unassigned	5.49609	-8.20312	6.12109	c1	1967NH	0.104897	NA	NA	NA	NA	NA
A/Hong Kong/1-1-MA-20A/1968	EPI156281	EPI_ISL_20812	Asia / Hong Kong (SAR)	Human	1968	329	unassigned	unassigned	5.51172	-8.1875	6.16797	c1	1967NH	0.156387	NA	NA	NA	NA	NA
A/Hong Kong/1-1-MA-20E/1968	EPI156297	EPI_ISL_20814	Asia / Hong Kong (SAR)	Human	1968	329	unassigned	unassigned	5.51172	-8.1875	6.16797	c1	1967NH	0.156387	NA	NA	NA	NA	NA
A/Hong Kong/1-6/1968	EPI156337	EPI_ISL_20819	Asia / Hong Kong (SAR)	Human	1968	329	unassigned	unassigned	5.49609	-8.20312	6.12109	c1	1967NH	0.104897	NA	NA	NA	NA	NA
A/Hong Kong/1-5/1968	EPI156329	EPI_ISL_20818	Asia / Hong Kong (SAR)	Human	1968	329	unassigned	unassigned	5.49609	-8.20312	6.12109	c1	1967NH	0.104897	NA	NA	NA	NA	NA
A/Hong Kong/1-4/1968	EPI156321	EPI_ISL_20817	Asia / Hong Kong (SAR)	Human	1968	329	unassigned	unassigned	5.49609	-8.20312	6.12109	c1	1967NH	0.104897	NA	NA	NA	NA	NA
A/Hong Kong/1-2/1968	EPI156313	EPI_ISL_20816	Asia / Hong Kong (SAR)	Human	1968	329	unassigned	unassigned	5.49609	-8.20312	6.12109	c1	1967NH	0.104897	NA	NA	NA	NA	NA
A/Hong Kong/1-9/1968	EPI156353	EPI_ISL_20821	Asia / Hong Kong (SAR)	Human	1968	329	unassigned	unassigned	5.49609	-8.20312	6.12109	c1	1967NH	0.104897	NA	NA	NA	NA	NA
A/Hong Kong/1-7/1968	EPI156345	EPI_ISL_20820	Asia / Hong Kong (SAR)	Human	1968	329	unassigned	unassigned	5.49609	-8.20312	6.12109	c1	1967NH	0.104897	NA	NA	NA	NA	NA
A/Hong Kong/1-10/1968	EPI156361	EPI_ISL_20822	Asia / Hong Kong (SAR)	Human	1968	329	unassigned	unassigned	5.49609	-8.20312	6.12109	c1	1967NH	0.104897	NA	NA	NA	NA	NA
A/Hong Kong/1-12/1968	EPI156369	EPI_ISL_20823	Asia / Hong Kong (SAR)	Human	1968	329	unassigned	unassigned	5.49609	-8.20312	6.12109	c1	1967NH	0.104897	NA	NA	NA	NA	NA
A/Hong Kong/1-1-MA21-1/1968	EPI156377	EPI_ISL_20824	Asia / Hong Kong (SAR)	Human	1968	329	unassigned	unassigned	5.49609	-8.20312	6.12109	c1	1967NH	0.104897	NA	NA	NA	NA	NA
A/Hong Kong/1-4-MA21-3/1968	EPI156425	EPI_ISL_20830	Asia / Hong Kong (SAR)	Human	1968	329	unassigned	unassigned	5.48438	-8.19531	6.125	c1	1967NH	0.109636	NA	NA	NA	NA	NA
A/Hong Kong/1-4-MA21-2/1968	EPI156417	EPI_ISL_20829	Asia / Hong Kong (SAR)	Human	1968	329	unassigned	unassigned	5.50391	-8.14844	6.21094	c1	1967NH	0.209337	NA	NA	NA	NA	NA
A/Hong Kong/1-5-MA21-2/1968	EPI156433	EPI_ISL_20831	Asia / Hong Kong (SAR)	Human	1968	329	unassigned	unassigned	5.51172	-8.15625	6.20312	c1	1967NH	0.200373	NA	NA	NA	NA	NA
A/Hong Kong/1-1-MA21-2/1968	EPI156385	EPI_ISL_20825	Asia / Hong Kong (SAR)	Human	1968	329	unassigned	unassigned	5.49609	-8.20312	6.12109	c1	1967NH	0.104897	NA	NA	NA	NA	NA
A/Hong Kong/1-1-MA21-3/1968	EPI156393	EPI_ISL_20826	Asia / Hong Kong (SAR)	Human	1968	329	unassigned	unassigned	5.49219	-8.1875	6.16016	c1	1967NH	0.145321	NA	NA	NA	NA	NA
A/Hong Kong/1-8-MA21-2/1968	EPI156441	EPI_ISL_20832	Asia / Hong Kong (SAR)	Human	1968	329	unassigned	unassigned	5.49609	-8.20312	6.12109	c1	1967NH	0.104897	NA	NA	NA	NA	NA
A/Hong Kong/1-2-MA21-1/1968	EPI156401	EPI_ISL_20827	Asia / Hong Kong (SAR)	Human	1968	329	unassigned	unassigned	5.49609	-8.20312	6.12109	c1	1967NH	0.104897	NA	NA	NA	NA	NA
A/Hong Kong/1-2-MA21-2/1968	EPI156409	EPI_ISL_20828	Asia / Hong Kong (SAR)	Human	1968	329	unassigned	unassigned	5.49219	-8.19531	6.13672	c1	1967NH	0.121134	NA	NA	NA	NA	NA
A/Hong Kong/1-10-MA21-1/1968	EPI306285	EPI_ISL_87272	Asia / Hong Kong (SAR)	Human	1968-01-03	329	unassigned	unassigned	5.51562	-8.17969	6.18359	c1	1967NH	0.174247	NA	NA	NA	NA	NA
A/Hong Kong/1-2-MA21-3/1968	EPI306293	EPI_ISL_87273	Asia / Hong Kong (SAR)	Human	1968	329	unassigned	unassigned	5.51953	-8.21875	6.0625	c1	1967NH	0.0658819	NA	NA	NA	NA	NA
A/Hong Kong/1-4-MA21-1/1968	EPI306301	EPI_ISL_87274	Asia / Hong Kong (SAR)	Human	1968-01-02	329	unassigned	unassigned	5.51562	-8.22656	6.14062	c1	1967NH	0.1217	NA	NA	NA	NA	NA
A/Hong Kong/1-9-MA21-2/1968	EPI159304	EPI_ISL_22615	Asia / Hong Kong (SAR)	Human	1968	329	unassigned	unassigned	5.52344	-8.23438	6.08984	c1	1967NH	0.0813947	NA	NA	NA	NA	NA
A/Hong Kong/1-1-MA-12/1968	EPI159288	EPI_ISL_22613	Asia / Hong Kong (SAR)	Human	1968	329	unassigned	unassigned	5.51172	-8.1875	6.16797	c1	1967NH	0.156387	NA	NA	NA	NA	NA
A/Hong Kong/1-9-MA21-1/1968	EPI159296	EPI_ISL_22614	Asia / Hong Kong (SAR)	Human	1968	329	unassigned	unassigned	5.51562	-8.22656	6.09375	c1	1967NH	0.081289	NA	NA	NA	NA	NA
A/Hong Kong/1-9-MA21-3/1968	EPI159312	EPI_ISL_22616	Asia / Hong Kong (SAR)	Human	1968	329	unassigned	unassigned	5.47656	-8.17969	6.13672	c1	1967NH	0.126925	NA	NA	NA	NA	NA
A/Hong Kong/1-11-MA21-2/1968	EPI159328	EPI_ISL_22618	Asia / Hong Kong (SAR)	Human	1968	329	unassigned	unassigned	5.40234	-8.25781	6.03906	c1	1967NH	0.0692853	NA	NA	NA	NA	NA
A/Hong Kong/1-11-MA21-3/1968	EPI159336	EPI_ISL_22619	Asia / Hong Kong (SAR)	Human	1968	329	unassigned	unassigned	5.48438	-8.1875	6.13281	c1	1967NH	0.120203	NA	NA	NA	NA	NA
A/Hong Kong/1-11-MA21-1/1968	EPI159320	EPI_ISL_22617	Asia / Hong Kong (SAR)	Human	1968	329	unassigned	unassigned	5.40234	-8.25781	6.03906	c1	1967NH	0.0692853	NA	NA	NA	NA	NA
A/Hong Kong/1-12-MA21-2/1968	EPI159352	EPI_ISL_22621	Asia / Hong Kong (SAR)	Human	1968	329	unassigned	unassigned	5.49219	-8.19531	6.13672	c1	1967NH	0.121134	NA	NA	NA	NA	NA
A/Hong Kong/1-12-MA21-1/1968	EPI159344	EPI_ISL_22620	Asia / Hong Kong (SAR)	Human	1968	329	unassigned	unassigned	5.49219	-8.19531	6.13672	c1	1967NH	0.121134	NA	NA	NA	NA	NA
A/Hong Kong/1-1-MA-12D/1968	EPI160090	EPI_ISL_22820	Asia / Hong Kong (SAR)	Human	1968	329	unassigned	unassigned	5.51172	-8.1875	6.16797	c1	1967NH	0.156387	NA	NA	NA	NA	NA
A/Hong Kong/1-8/1968	EPI160098	EPI_ISL_22821	Asia / Hong Kong (SAR)	Human	1968	329	unassigned	unassigned	5.49609	-8.20312	6.12109	c1	1967NH	0.104897	NA	NA	NA	NA	NA
A/Hong Kong/1-11/1968	EPI160106	EPI_ISL_22822	Asia / Hong Kong (SAR)	Human	1968	329	unassigned	unassigned	5.49609	-8.20312	6.12109	c1	1967NH	0.104897	NA	NA	NA	NA	NA
A/Hong Kong/1-6-MA21-2/1968	EPI281156	EPI_ISL_22823	Asia / Hong Kong (SAR)	Human	1968	329	unassigned	unassigned	5.50391	-8.14844	6.21094	c1	1967NH	0.209337	NA	NA	NA	NA	NA
A/Hong Kong/1-8-MA21-1/1968	EPI160122	EPI_ISL_22824	Asia / Hong Kong (SAR)	Human	1968	329	unassigned	unassigned	5.49609	-8.20312	6.12109	c1	1967NH	0.104897	NA	NA	NA	NA	NA
A/Hong Kong/1-8-MA21-3/1968	EPI160130	EPI_ISL_22825	Asia / Hong Kong (SAR)	Human	1968	329	unassigned	unassigned	5.51562	-8.17969	6.18359	c1	1967NH	0.174247	NA	NA	NA	NA	NA
A/Hong Kong/1-12-MA21-3/1968	EPI160138	EPI_ISL_22826	Asia / Hong Kong (SAR)	Human	1968	329	unassigned	unassigned	5.49219	-8.19531	6.13672	c1	1967NH	0.121134	NA	NA	NA	NA	NA
A/Aichi/2/1968	EPI381955	EPI_ISL_123225	Asia / Japan / Aichi	Human	1968	329	unassigned	unassigned	5.49609	-8.20312	6.12109	c1	1967NH	0.104897	NA	NA	NA	NA	NA
A/Hong Kong/1-1-MA-12A/1968	EPI165409	EPI_ISL_25009	Asia / Hong Kong (SAR)	Human	1968	329	unassigned	unassigned	5.25391	-8.07812	6.06641	c1	1967NH	0.277257	NA	NA	NA	NA	NA
A/Hong Kong/1-1-MA-12B/1968	EPI165417	EPI_ISL_25010	Asia / Hong Kong (SAR)	Human	1968	329	unassigned	unassigned	5.4375	-8.34375	6	c1	1967NH	0.105805	NA	NA	NA	NA	NA
A/Hong Kong/1-1-MA-12C/1968	EPI165425	EPI_ISL_25011	Asia / Hong Kong (SAR)	Human	1968	329	unassigned	unassigned	5.51172	-8.1875	6.16797	c1	1967NH	0.156387	NA	NA	NA	NA	NA
A/Hong Kong/1-1-MA-12E/1968	EPI165433	EPI_ISL_25012	Asia / Hong Kong (SAR)	Human	1968	329	unassigned	unassigned	5.51172	-8.1875	6.16797	c1	1967NH	0.156387	NA	NA	NA	NA	NA
A/Hong Kong/1-1-MA-20D/1968	EPI165441	EPI_ISL_25013	Asia / Hong Kong (SAR)	Human	1968	329	unassigned	unassigned	5.51172	-8.1875	6.16797	c1	1967NH	0.156387	NA	NA	NA	NA	NA
A/Hong Kong/1-10-MA21-2/1968	EPI165449	EPI_ISL_25014	Asia / Hong Kong (SAR)	Human	1968	329	unassigned	unassigned	5.35938	-8.30469	5.98047	c1	1967NH	0.134047	NA	NA	NA	NA	NA
A/Bilthoven/16190/1968	EPI492843	EPI_ISL_124885	Europe / Netherlands	Human	1968	329	unassigned	unassigned	5.45312	-8.25	6.0625	c1	1967NH	0.0370803	NA	NA	NA	NA	NA
A/Bilthoven/16190/1968	EPI2120233	EPI_ISL_14284798	Europe / Netherlands / South Holland / Gemeente Rotterdam	Human	1968	329	unassigned	unassigned	5.45312	-8.25	6.0625	c1	1967NH	0.0370803	NA	NA	NA	NA	NA
A/Bilthoven/908/69	EPI23762	EPI_ISL_4208	Europe / Netherlands / Provincie Utrecht / Gemeente De Bilt / Bilthoven	Human	1969	329	unassigned	unassigned	5.41016	-8.25781	6.0625	c1	1968NH	0.633533	NA	NA	NA	NA	NA
A/Bilthoven/17938/69	EPI23764	EPI_ISL_4209	Europe / Netherlands / Provincie Utrecht / Gemeente De Bilt / Bilthoven	Human	1969	329	unassigned	unassigned	5.41016	-8.25781	6.0625	c1	1968NH	0.633533	NA	NA	NA	NA	NA
A/Bilthoven/808/69	EPI23858	EPI_ISL_4254	Europe / Netherlands / Provincie Utrecht / Gemeente De Bilt / Bilthoven	Human	1969	329	unassigned	unassigned	3.03711	-8.60938	3.78711	c1	1968NH	2.67289	NA	NA	NA	NA	NA
A/Albany/1/1969	EPI56885	EPI_ISL_6848	North America / United States / New York	Human	1969	329	unassigned	unassigned	5.45312	-8.25	6.0625	c1	1968NH	0.66578	NA	NA	NA	NA	NA
A/Albany/3/1969	EPI56923	EPI_ISL_6850	North America / United States / New York	Human	1969	329	unassigned	unassigned	5.43359	-8.25	6.07422	c1	1968NH	0.659268	NA	NA	NA	NA	NA
A/Albany/4/1969	EPI61403	EPI_ISL_7065	North America / United States / New York	Human	1969	329	unassigned	unassigned	5.45312	-8.25	6.0625	c1	1968NH	0.66578	NA	NA	NA	NA	NA
A/Hong Kong/3/1969	EPI91010	EPI_ISL_8984	Asia / Hong Kong (SAR)	Human	1969	329	unassigned	unassigned	5.46484	-8.21094	6.125	c1	1968NH	0.721648	NA	NA	NA	NA	NA
A/Bilthoven/808/1969	EPI362388	EPI_ISL_110747	Europe / Netherlands	Human	1969	329	unassigned	unassigned	3.08203	-8.61719	3.88867	c1	1968NH	2.57206	NA	NA	NA	NA	NA
A/Bilthoven/17938/1969	EPI364408	EPI_ISL_113035	Europe / Netherlands	Human	1969	329	unassigned	unassigned	5.41016	-8.25781	6.0625	c1	1968NH	0.633533	NA	NA	NA	NA	NA
A/Bilthoven/908/1969	EPI364400	EPI_ISL_113017	Europe / Netherlands	Human	1969	329	unassigned	unassigned	5.41016	-8.25781	6.0625	c1	1968NH	0.633533	NA	NA	NA	NA	NA
A/Bilthoven/93/70	EPI23766	EPI_ISL_4210	Europe / Netherlands / Provincie Utrecht / Gemeente De Bilt / Bilthoven	Human	1970	329	unassigned	unassigned	5.40625	-8.30469	5.99609	c1	1969NH	0.0721917	NA	NA	NA	NA	NA
A/Bilthoven/2668/70	EPI23768	EPI_ISL_4211	Europe / Netherlands / Provincie Utrecht / Gemeente De Bilt / Bilthoven	Human	1970	329	unassigned	unassigned	5.42188	-8.25	6.06641	c1	1969NH	0.0195235	NA	NA	NA	NA	NA
A/Albany/2/1970	EPI59645	EPI_ISL_6978	North America / United States / New York	Human	1970	329	unassigned	unassigned	5.41016	-8.25781	6.0625	c1	1969NH	0.00988834	NA	NA	NA	NA	NA
A/Albany/6/1970	EPI59721	EPI_ISL_6982	North America / United States / New York	Human	1970	329	unassigned	unassigned	5.41016	-8.25781	6.0625	c1	1969NH	0.00988834	NA	NA	NA	NA	NA
A/Albany/1/1970	EPI63880	EPI_ISL_7268	North America / United States / New York	Human	1970	329	unassigned	unassigned	5.41016	-8.25781	6.0625	c1	1969NH	0.00988834	NA	NA	NA	NA	NA
A/Albany/3/1970	EPI63899	EPI_ISL_7269	North America / United States / New York	Human	1970	329	unassigned	unassigned	5.41016	-8.25781	6.0625	c1	1969NH	0.00988834	NA	NA	NA	NA	NA
A/Bilthoven/2668/1970	EPI362402	EPI_ISL_110777	Europe / Netherlands	Human	1970	329	unassigned	unassigned	5.42188	-8.25	6.06641	c1	1969NH	0.0195235	NA	NA	NA	NA	NA
A/Memphis/1/71	EPI80015	EPI_ISL_152	North America / United States / Tennessee	Human	1971	329	unassigned	unassigned	5.01172	-7.95312	5.91016	c1	1970NH	0.495719	NA	NA	NA	NA	NA
A/Bilthoven/6449/71	EPI23770	EPI_ISL_4212	Europe / Netherlands / Provincie Utrecht / Gemeente De Bilt / Bilthoven	Human	1971	329	unassigned	unassigned	5.30859	-8.27344	5.94531	c1	1970NH	0.2293	NA	NA	NA	NA	NA
A/Bilthoven/21438/71	EPI23772	EPI_ISL_4213	Europe / Netherlands / Provincie Utrecht / Gemeente De Bilt / Bilthoven	Human	1971	329	unassigned	unassigned	5.26562	-8.33594	5.90234	c1	1970NH	0.163486	NA	NA	NA	NA	NA
A/Bilthoven/21801/71	EPI23774	EPI_ISL_4214	Europe / Netherlands / Provincie Utrecht / Gemeente De Bilt / Bilthoven	Human	1971	329	unassigned	unassigned	5.11328	-8.22656	5.95703	c1	1970NH	0.284016	NA	NA	NA	NA	NA
A/Memphis/3/1971	EPI60836	EPI_ISL_7037	North America / United States / Tennessee	Human	1971	329	unassigned	unassigned	5.11328	-8.22656	5.95703	c1	1970NH	0.284016	NA	NA	NA	NA	NA
A/Hong Kong/46/1971	EPI91884	EPI_ISL_9029	Asia / Hong Kong (SAR)	Human	1971	329	unassigned	unassigned	5.66797	-8.67969	5.47656	c1	1970NH	0.59467	NA	NA	NA	NA	NA
A/Bilthoven/6449/1971	EPI362407	EPI_ISL_110778	Europe / Netherlands	Human	1971	329	unassigned	unassigned	5.30859	-8.27344	5.94531	c1	1970NH	0.2293	NA	NA	NA	NA	NA
A/Hong Kong/107/1971	EPI362414	EPI_ISL_110779	Asia / Hong Kong (SAR)	Human	1971	329	unassigned	unassigned	5.20703	-9.10156	4.66797	c1	1970NH	1.30709	NA	NA	NA	NA	NA
A/Hong Kong/107/1971	EPI118982	EPI_ISL_12617	Asia / Hong Kong (SAR)	Human	1971	329	unassigned	unassigned	5.33984	-8.80469	5.04688	c1	1970NH	0.831953	NA	NA	NA	NA	NA
A/Bilthoven/21438/1971	EPI364416	EPI_ISL_113036	Europe / Netherlands	Human	1971	329	unassigned	unassigned	5.26562	-8.33594	5.90234	c1	1970NH	0.163486	NA	NA	NA	NA	NA
A/Bilthoven/21801/1971	EPI364424	EPI_ISL_113037	Europe / Netherlands	Human	1971	329	unassigned	unassigned	5.11328	-8.22656	5.95703	c1	1970NH	0.284016	NA	NA	NA	NA	NA
A/Memphis/1/71	EPI137302	EPI_ISL_21048	North America / United States / Tennessee	Human	1971	329	unassigned	unassigned	5.01172	-7.95312	5.91016	c1	1970NH	0.495719	NA	NA	NA	NA	NA
A/Bilthoven/16190/1968	EPI1868399	EPI_ISL_2391505	Europe / Netherlands	Human	1971-01-01	329	unassigned	unassigned	5.45312	-8.25	6.0625	c1	1970NH	0.397385	NA	NA	NA	NA	NA
A/Memphis/102/72	EPI79084	EPI_ISL_237	North America / United States / Tennessee	Human	1972	329	unassigned	unassigned	4.33203	-9.64844	3.4375	c1	1971NH	0.467745	NA	NA	NA	NA	NA
A/England/72	EPI230566	EPI_ISL_66096	Europe / United Kingdom	Human	1972	329	unassigned	unassigned	4.52344	-9.60938	3.68164	c1	1971NH	0.207434	NA	NA	NA	NA	NA
A/Udorn/72	EPI230618	EPI_ISL_66106	Europe / Russian Federation	Human	1972	329	unassigned	unassigned	4.54688	-9.375	3.87305	c1	1971NH	0.10011	NA	NA	NA	NA	NA
A/Bilthoven/21793/1972	EPI545276	EPI_ISL_167238	Europe / Netherlands	Human	1972	329	unassigned	unassigned	4.33203	-9.64844	3.4375	c1	1971NH	0.467745	NA	NA	NA	NA	NA
A/Bilthoven/6022/72	EPI23776	EPI_ISL_4215	Europe / Netherlands / Provincie Utrecht / Gemeente De Bilt / Bilthoven	Human	1972	329	unassigned	unassigned	5.12891	-8.25781	5.89844	c1	1971NH	2.47474	NA	NA	NA	NA	NA
A/Bilthoven/23337/72	EPI23780	EPI_ISL_4217	Europe / Netherlands / Provincie Utrecht / Gemeente De Bilt / Bilthoven	Human	1972	329	unassigned	unassigned	4.33203	-9.64844	3.4375	c1	1971NH	0.467745	NA	NA	NA	NA	NA
A/Bilthoven/23290/72	EPI23778	EPI_ISL_4216	Europe / Netherlands / Provincie Utrecht / Gemeente De Bilt / Bilthoven	Human	1972	329	unassigned	unassigned	4.33203	-9.64844	3.4375	c1	1971NH	0.467745	NA	NA	NA	NA	NA
A/Bilthoven/21793/72	EPI23860	EPI_ISL_4255	Europe / Netherlands / Provincie Utrecht / Gemeente De Bilt / Bilthoven	Human	1972	329	unassigned	unassigned	4.33203	-9.64844	3.4375	c1	1971NH	0.467745	NA	NA	NA	NA	NA
A/Udorn/307/1972	EPI105182	EPI_ISL_8104	Asia / Thailand / Udon Thani / Udon Thani	Human	1972	329	unassigned	unassigned	4.48828	-9.54688	3.7168	c1	1971NH	0.141597	NA	NA	NA	NA	NA
A/Memphis/109/1972	EPI82754	EPI_ISL_8587	North America / United States / Tennessee	Human	1972	329	unassigned	unassigned	4.33203	-9.64844	3.4375	c1	1971NH	0.467745	NA	NA	NA	NA	NA
A/Hong Kong/6/1972	EPI84445	EPI_ISL_8676	Asia / Hong Kong (SAR)	Human	1972	329	unassigned	unassigned	5.30859	-9.07031	4.80078	c1	1971NH	1.31655	NA	NA	NA	NA	NA
A/Hong Kong/50/1972	EPI91029	EPI_ISL_8985	Asia / Hong Kong (SAR)	Human	1972	329	unassigned	unassigned	5.21484	-8.92969	4.92578	c1	1971NH	1.40809	NA	NA	NA	NA	NA
A/Guandong/243/1972	EPI94943	EPI_ISL_9190	Asia / China	Human	1972	329	unassigned	unassigned	4.38672	-9.5	3.5918	c1	1971NH	0.26777	NA	NA	NA	NA	NA
A/Memphis/103/1972	EPI96086	EPI_ISL_9251	North America / United States / Tennessee	Human	1972	329	unassigned	unassigned	4.33203	-9.64844	3.4375	c1	1971NH	0.467745	NA	NA	NA	NA	NA
A/Memphis/105/1972	EPI96618	EPI_ISL_9279	North America / United States / Tennessee	Human	1972	329	unassigned	unassigned	4.33203	-9.64844	3.4375	c1	1971NH	0.467745	NA	NA	NA	NA	NA
A/Memphis/101/1972	EPI96599	EPI_ISL_9278	North America / United States / Tennessee	Human	1972	329	unassigned	unassigned	4.33203	-9.64844	3.4375	c1	1971NH	0.467745	NA	NA	NA	NA	NA
A/Bilthoven/23337/1972	EPI362435	EPI_ISL_110819	Europe / Netherlands	Human	1972	329	unassigned	unassigned	4.33203	-9.64844	3.4375	c1	1971NH	0.467745	NA	NA	NA	NA	NA
A/Bilthoven/6022/1972	EPI362421	EPI_ISL_110780	Europe / Netherlands	Human	1972	329	unassigned	unassigned	5.12891	-8.25781	5.89844	c1	1971NH	2.47474	NA	NA	NA	NA	NA
A/Bilthoven/23290/1972	EPI365170	EPI_ISL_113847	Europe / Netherlands	Human	1972	329	unassigned	unassigned	4.33203	-9.64844	3.4375	c1	1971NH	0.467745	NA	NA	NA	NA	NA
A/England/42/1972	EPI365178	EPI_ISL_113863	Europe / United Kingdom	Human	1972	329	unassigned	unassigned	4.49219	-9.61719	3.60938	c1	1971NH	0.267333	NA	NA	NA	NA	NA
A/Bilthoven/21793/1972	EPI297798	EPI_ISL_84900	Europe / Netherlands	Human	1972	329	unassigned	unassigned	4.33203	-9.64844	3.4375	c1	1971NH	0.467745	NA	NA	NA	NA	NA
A/England/42/1972	EPI381987	EPI_ISL_123229	Europe / United Kingdom	Human	1972	329	unassigned	unassigned	4.57812	-9.6875	3.57227	c1	1971NH	0.345059	NA	NA	NA	NA	NA
A/Bilthoven/21793/1972	EPI2120241	EPI_ISL_14284799	Europe / Netherlands / South Holland / Gemeente Rotterdam	Human	1972	329	unassigned	unassigned	4.33203	-9.64844	3.4375	c1	1971NH	0.467745	NA	NA	NA	NA	NA
A/Bilthoven/21793/1972	EPI1868401	EPI_ISL_2391768	Europe / Netherlands	Human	1972-01-01	329	unassigned	unassigned	4.33203	-9.64844	3.4375	c1	1971NH	0.467745	NA	NA	NA	NA	NA
A/Dunedin/4/73	EPI6448	EPI_ISL_1411	Oceania / New Zealand	Human	1973	329	unassigned	unassigned	4.04297	-9.84375	3.23438	c1	1972NH	0.297773	NA	NA	NA	NA	NA
A/Bilthoven/552/73	EPI23782	EPI_ISL_4218	Europe / Netherlands / Provincie Utrecht / Gemeente De Bilt / Bilthoven	Human	1973	329	unassigned	unassigned	4.55469	-9.57031	3.36914	c1	1972NH	0.326574	NA	NA	NA	NA	NA
A/Bilthoven/748/73	EPI23784	EPI_ISL_4219	Europe / Netherlands / Provincie Utrecht / Gemeente De Bilt / Bilthoven	Human	1973	329	unassigned	unassigned	4.28516	-9.59375	3.50586	c1	1972NH	0.160329	NA	NA	NA	NA	NA
A/Bilthoven/3517/73	EPI23786	EPI_ISL_4220	Europe / Netherlands / Provincie Utrecht / Gemeente De Bilt / Bilthoven	Human	1973	329	unassigned	unassigned	4.28516	-9.59375	3.50586	c1	1972NH	0.160329	NA	NA	NA	NA	NA
A/Hong Kong/33/1973	EPI28911	EPI_ISL_5100	Asia / Hong Kong (SAR)	Human	1973	329	unassigned	unassigned	4.33594	-9.64844	3.42383	c1	1972NH	0.106157	NA	NA	NA	NA	NA
A/Hong Kong/11/1973	EPI84388	EPI_ISL_8673	Asia / Hong Kong (SAR)	Human	1973	329	unassigned	unassigned	4.30469	-9.63281	3.44727	c1	1972NH	0.103208	NA	NA	NA	NA	NA
A/Memphis/3/1973	EPI92188	EPI_ISL_9045	North America / United States / Tennessee	Human	1973	329	unassigned	unassigned	4.33203	-9.64844	3.4375	c1	1972NH	0.110032	NA	NA	NA	NA	NA
A/Bilthoven/748/1973	EPI362442	EPI_ISL_110820	Europe / Netherlands	Human	1973	329	unassigned	unassigned	4.28516	-9.59375	3.50586	c1	1972NH	0.160329	NA	NA	NA	NA	NA
A/Bilthoven/552/1973	EPI365186	EPI_ISL_113864	Europe / Netherlands	Human	1973	329	unassigned	unassigned	4.55469	-9.57031	3.36914	c1	1972NH	0.326574	NA	NA	NA	NA	NA
A/Bilthoven/3517/1973	EPI365194	EPI_ISL_113915	Europe / Netherlands	Human	1973	329	unassigned	unassigned	4.28516	-9.59375	3.50586	c1	1972NH	0.160329	NA	NA	NA	NA	NA
A/Port Chalmers/1/1973	EPI365202	EPI_ISL_113916	Oceania / New Zealand	Human	1973	329	unassigned	unassigned	3.85156	-9.83594	3.10156	c1	1972NH	0.505609	NA	NA	NA	NA	NA
A/Port Chalmers/JY2/1973	EPI472264	EPI_ISL_147170	Oceania / New Zealand	Human	1973	329	unassigned	unassigned	4.04297	-9.84375	3.23438	c1	1972NH	0.297773	NA	NA	NA	NA	NA
A/Port Chalmers/1/1973	EPI382054	EPI_ISL_123257	Oceania / New Zealand	Human	1973	329	unassigned	unassigned	4.04297	-9.84375	3.23438	c1	1972NH	0.297773	NA	NA	NA	NA	NA
A/Bilthoven/9459/74	EPI23788	EPI_ISL_4221	Europe / Netherlands / Provincie Utrecht / Gemeente De Bilt / Bilthoven	Human	1974	329	unassigned	unassigned	4.64844	-10.0078	3.04297	c1	1973NH	0.183159	NA	NA	NA	NA	NA
A/Bilthoven/5931/74	EPI23812	EPI_ISL_4233	Europe / Netherlands / Provincie Utrecht / Gemeente De Bilt / Bilthoven	Human	1974	329	unassigned	unassigned	4.73438	-10.0469	2.81445	c1	1973NH	0.0970784	NA	NA	NA	NA	NA
A/Bilthoven/5146/74	EPI23814	EPI_ISL_4234	Europe / Netherlands / Provincie Utrecht / Gemeente De Bilt / Bilthoven	Human	1974	329	unassigned	unassigned	4.18359	-9.625	2.89062	c1	1973NH	0.621024	NA	NA	NA	NA	NA
A/Bilthoven/7398/74	EPI23832	EPI_ISL_4241	Europe / Netherlands / Provincie Utrecht / Gemeente De Bilt / Bilthoven	Human	1974	329	unassigned	unassigned	4.80078	-9.90625	2.97852	c1	1973NH	0.167927	NA	NA	NA	NA	NA
A/Bilthoven/5930/74	EPI23862	EPI_ISL_4256	Europe / Netherlands / Provincie Utrecht / Gemeente De Bilt / Bilthoven	Human	1974	329	unassigned	unassigned	4.73438	-10.0469	2.81445	c1	1973NH	0.0970784	NA	NA	NA	NA	NA
A/Albany/20/1974	EPI59664	EPI_ISL_6979	North America / United States / New York	Human	1974	329	unassigned	unassigned	4.6875	-9.94531	2.55078	c1	1973NH	0.31946	NA	NA	NA	NA	NA
A/Hong Kong/14/1974	EPI84312	EPI_ISL_8669	Asia / Hong Kong (SAR)	Human	1974	329	unassigned	unassigned	4.73438	-10.0469	2.81445	c1	1973NH	0.0970784	NA	NA	NA	NA	NA
A/Memphis/101/1974	EPI91960	EPI_ISL_9033	North America / United States / Tennessee	Human	1974	329	unassigned	unassigned	4.75391	-10.1172	2.68555	c1	1973NH	0.238233	NA	NA	NA	NA	NA
A/Memphis/102/1974	EPI92207	EPI_ISL_9046	North America / United States / Tennessee	Human	1974	329	unassigned	unassigned	4.75391	-10.1172	2.68555	c1	1973NH	0.238233	NA	NA	NA	NA	NA
A/Memphis/103/1974	EPI92226	EPI_ISL_9047	North America / United States / Tennessee	Human	1974	329	unassigned	unassigned	4.75391	-10.1172	2.68555	c1	1973NH	0.238233	NA	NA	NA	NA	NA
A/Hong Kong/49/1974	EPI92416	EPI_ISL_9057	Asia / Hong Kong (SAR)	Human	1974	329	unassigned	unassigned	4.55078	-9.8125	3.24219	c1	1973NH	0.432763	NA	NA	NA	NA	NA
A/Bilthoven/5930/1974	EPI365210	EPI_ISL_113917	Europe / Netherlands	Human	1974	329	unassigned	unassigned	4.82812	-10	2.88086	c1	1973NH	0.135674	NA	NA	NA	NA	NA
A/Bilthoven/5931/1974	EPI365218	EPI_ISL_113918	Europe / Netherlands	Human	1974	329	unassigned	unassigned	4.8125	-9.94531	2.92188	c1	1973NH	0.13269	NA	NA	NA	NA	NA
A/Bilthoven/7398/1974	EPI365226	EPI_ISL_113919	Europe / Netherlands	Human	1974	329	unassigned	unassigned	4.80078	-9.90625	2.97852	c1	1973NH	0.167927	NA	NA	NA	NA	NA
A/Bilthoven/9459/1974	EPI365234	EPI_ISL_113920	Europe / Netherlands	Human	1974	329	unassigned	unassigned	4.64844	-10.0078	3.04297	c1	1973NH	0.183159	NA	NA	NA	NA	NA
A/Victoria/3/1975	EPI131300	EPI_ISL_1096	Oceania / Australia / Victoria	Human	1975	329	unassigned	unassigned	5.01172	-10.3438	1.95312	c1	1974NH	0.637933	NA	NA	NA	NA	NA
A/Victoria/3/1975	EPI406673	EPI_ISL_132394	Oceania / Australia	Human	1975-04-01	329	unassigned	unassigned	5.32031	-10.1719	1.79199	c1	1975SH	0	NA	NA	NA	NA	NA
A/Bilthoven/2813/75	EPI23834	EPI_ISL_4242	Europe / Netherlands / Provincie Utrecht / Gemeente De Bilt / Bilthoven	Human	1975	329	unassigned	unassigned	4.80078	-9.90625	2.97852	c1	1974NH	0.523464	NA	NA	NA	NA	NA
A/Bilthoven/2600/75	EPI23864	EPI_ISL_4257	Europe / Netherlands / Provincie Utrecht / Gemeente De Bilt / Bilthoven	Human	1975	329	unassigned	unassigned	4.74609	-9.83594	2.85547	c1	1974NH	0.439679	NA	NA	NA	NA	NA
A/Albany/42/1975	EPI59626	EPI_ISL_6977	North America / United States / New York	Human	1975	329	unassigned	unassigned	4.46484	-9.88281	2.48047	c1	1974NH	0.438785	NA	NA	NA	NA	NA
A/Hong Kong/43/1975	EPI84863	EPI_ISL_8698	Asia / Hong Kong (SAR)	Human	1975	329	unassigned	unassigned	5.12109	-10.1953	2.00391	c1	1974NH	0.558963	NA	NA	NA	NA	NA
A/Beijing/39/75	EPI90404	EPI_ISL_8953	Asia / China	Human	1975	329	unassigned	unassigned	5.6875	-10.1094	1.25391	c1	1974NH	1.45862	NA	NA	NA	NA	NA
A/Bilthoven/4273/1975	EPI362455	EPI_ISL_110822	Europe / Netherlands	Human	1975	329	unassigned	unassigned	4.58594	-9.92969	2.70898	c1	1974NH	0.391886	NA	NA	NA	NA	NA
A/England/864/1975	EPI118980	EPI_ISL_12616	Europe / United Kingdom	Human	1975	329	unassigned	unassigned	4.72656	-9.32031	3.28906	c1	1974NH	1.07059	NA	NA	NA	NA	NA
A/Bilthoven/334/1975	EPI365242	EPI_ISL_113921	Europe / Netherlands	Human	1975	329	unassigned	unassigned	4.75781	-10.0938	2.73438	c1	1974NH	0.314013	NA	NA	NA	NA	NA
A/Bilthoven/1843/1975	EPI365249	EPI_ISL_113965	Europe / Netherlands	Human	1975	329	unassigned	unassigned	4.75781	-10.0938	2.73438	c1	1974NH	0.314013	NA	NA	NA	NA	NA
A/Bilthoven/2813/1975	EPI365265	EPI_ISL_113967	Europe / Netherlands	Human	1975	329	unassigned	unassigned	4.74609	-9.83594	2.85547	c1	1974NH	0.439679	NA	NA	NA	NA	NA
A/Victoria/3/1975	EPI365273	EPI_ISL_113968	Oceania / Australia / Victoria	Human	1975	329	unassigned	unassigned	5.32031	-10.1719	1.79199	c1	1974NH	0.822927	NA	NA	NA	NA	NA
A/Bilthoven/2600/1975	EPI365257	EPI_ISL_113966	Europe / Netherlands	Human	1975	329	unassigned	unassigned	4.70703	-9.78906	2.92969	c1	1974NH	0.534317	NA	NA	NA	NA	NA
A/Victoria/3/1975	EPI382019	EPI_ISL_123233	Oceania / Australia / Victoria	Human	1975	329	unassigned	unassigned	5.03125	-10.3438	2.00391	c1	1974NH	0.601842	NA	NA	NA	NA	NA
A/Bilthoven/1761/1976	EPI545277	EPI_ISL_167239	Europe / Netherlands	Human	1976	329	unassigned	unassigned	5.62891	-10.125	1.22754	c1	1975NH	0.522394	NA	NA	NA	NA	NA
A/Bilthoven/2271/1976	EPI545278	EPI_ISL_167240	Europe / Netherlands	Human	1976	329	unassigned	unassigned	4.19141	-8.85156	2.9043	c1	1975NH	2.03747	NA	NA	NA	NA	NA
A/Bilthoven/1761/76	EPI23790	EPI_ISL_4222	Europe / Netherlands / Provincie Utrecht / Gemeente De Bilt / Bilthoven	Human	1976	329	unassigned	unassigned	5.62891	-10.125	1.22754	c1	1975NH	0.522394	NA	NA	NA	NA	NA
A/Bilthoven/2271/76	EPI23792	EPI_ISL_4223	Europe / Netherlands / Provincie Utrecht / Gemeente De Bilt / Bilthoven	Human	1976	329	unassigned	unassigned	4.86719	-9.36719	3.19922	c1	1975NH	1.73704	NA	NA	NA	NA	NA
A/Bilthoven/5029/76	EPI23794	EPI_ISL_4224	Europe / Netherlands / Provincie Utrecht / Gemeente De Bilt / Bilthoven	Human	1976	329	unassigned	unassigned	5.46094	-10.1172	1.12402	c1	1975NH	0.55056	NA	NA	NA	NA	NA
A/Bilthoven/5657/76	EPI23796	EPI_ISL_4225	Europe / Netherlands / Provincie Utrecht / Gemeente De Bilt / Bilthoven	Human	1976	329	unassigned	unassigned	5.50781	-10.1797	1.19629	c1	1975NH	0.523247	NA	NA	NA	NA	NA
A/Bilthoven/6545/76	EPI23798	EPI_ISL_4226	Europe / Netherlands / Provincie Utrecht / Gemeente De Bilt / Bilthoven	Human	1976	329	unassigned	unassigned	5.62891	-10.125	1.22754	c1	1975NH	0.522394	NA	NA	NA	NA	NA
A/Bilthoven/628/76	EPI23866	EPI_ISL_4258	Europe / Netherlands / Provincie Utrecht / Gemeente De Bilt / Bilthoven	Human	1976	329	unassigned	unassigned	4.80078	-9.30469	3.25977	c1	1975NH	1.83169	NA	NA	NA	NA	NA
A/Memphis/105/1976	EPI29044	EPI_ISL_5106	North America / United States / Tennessee	Human	1976	329	unassigned	unassigned	5.62891	-10.125	1.22754	c1	1975NH	0.522394	NA	NA	NA	NA	NA
A/Albany/15/1976	EPI61384	EPI_ISL_7064	North America / United States / New York	Human	1976	329	unassigned	unassigned	5.25391	-9.9375	1.42285	c1	1975NH	0.235864	NA	NA	NA	NA	NA
A/Albany/1/1976	EPI61631	EPI_ISL_7077	North America / United States / New York	Human	1976	329	unassigned	unassigned	5.64844	-10.1172	1.20703	c1	1975NH	0.545599	NA	NA	NA	NA	NA
A/Memphis/104/1976	EPI62466	EPI_ISL_7120	North America / United States / Tennessee	Human	1976	329	unassigned	unassigned	5.62891	-10.125	1.22754	c1	1975NH	0.522394	NA	NA	NA	NA	NA
A/Memphis/137/1976	EPI91979	EPI_ISL_9034	North America / United States / Tennessee	Human	1976	329	unassigned	unassigned	5.57812	-10.1016	1.2832	c1	1975NH	0.444823	NA	NA	NA	NA	NA
A/Memphis/110/76	EPI92245	EPI_ISL_9048	North America / United States / Tennessee	Human	1976	329	unassigned	unassigned	5.57812	-10.1016	1.2832	c1	1975NH	0.444823	NA	NA	NA	NA	NA
A/Memphis/103/1976	EPI92359	EPI_ISL_9054	North America / United States / Tennessee	Human	1976	329	unassigned	unassigned	5.62891	-10.125	1.22754	c1	1975NH	0.522394	NA	NA	NA	NA	NA
A/Memphis/106/1976	EPI96637	EPI_ISL_9280	North America / United States / Tennessee	Human	1976	329	unassigned	unassigned	5.62891	-10.1328	1.21582	c1	1975NH	0.53445	NA	NA	NA	NA	NA
A/Memphis/108/1976	EPI96656	EPI_ISL_9281	North America / United States / Tennessee	Human	1976	329	unassigned	unassigned	5.62891	-10.125	1.22754	c1	1975NH	0.522394	NA	NA	NA	NA	NA
A/Bilthoven/628/1976	EPI365281	EPI_ISL_113969	Europe / Netherlands	Human	1976	329	unassigned	unassigned	4.70312	-9.85938	2.82031	c1	1975NH	1.36091	NA	NA	NA	NA	NA
A/Bilthoven/1761/1976	EPI365289	EPI_ISL_113970	Europe / Netherlands	Human	1976	329	unassigned	unassigned	5.62891	-10.125	1.22754	c1	1975NH	0.522394	NA	NA	NA	NA	NA
A/Bilthoven/5657/1976	EPI365306	EPI_ISL_114015	Europe / Netherlands	Human	1976	329	unassigned	unassigned	5.50781	-10.1797	1.19629	c1	1975NH	0.523247	NA	NA	NA	NA	NA
A/Bilthoven/5029/1976	EPI365298	EPI_ISL_114014	Europe / Netherlands	Human	1976	329	unassigned	unassigned	5.46094	-10.1172	1.12402	c1	1975NH	0.55056	NA	NA	NA	NA	NA
A/Bilthoven/6545/1976	EPI365314	EPI_ISL_114016	Europe / Netherlands	Human	1976	329	unassigned	unassigned	5.62891	-10.125	1.22754	c1	1975NH	0.522394	NA	NA	NA	NA	NA
A/Bilthoven/1761/1976	EPI297771	EPI_ISL_84896	Europe / Netherlands	Human	1976	329	unassigned	unassigned	5.62891	-10.125	1.22754	c1	1975NH	0.522394	NA	NA	NA	NA	NA
A/Bilthoven/5168/1976	EPI385926	EPI_ISL_124887	Europe / Netherlands	Human	1976	329	unassigned	unassigned	5.62891	-10.1172	1.21973	c1	1975NH	0.525614	NA	NA	NA	NA	NA
A/Bilthoven/2271/1976	EPI492830	EPI_ISL_124886	Europe / Netherlands	Human	1976	329	unassigned	unassigned	4.86719	-9.36719	3.19922	c1	1975NH	1.73704	NA	NA	NA	NA	NA
A/Bilthoven/2271/1976	EPI2120249	EPI_ISL_14284800	Europe / Netherlands / South Holland / Gemeente Rotterdam	Human	1976	329	unassigned	unassigned	4.19141	-8.85156	2.9043	c1	1975NH	2.03747	NA	NA	NA	NA	NA
A/Bilthoven/1761/1976	EPI1868402	EPI_ISL_2391769	Europe / Netherlands	Human	1976-01-01	329	unassigned	unassigned	5.62891	-10.125	1.22754	c1	1975NH	0.522394	NA	NA	NA	NA	NA
A/Texas/1/77	EPI9335	EPI_ISL_240	North America / United States / Texas	Human	1977	329	unassigned	unassigned	4.26562	-8.83594	2.95898	c1	1976NH	0.957072	NA	NA	NA	NA	NA
A/Rotterdam/5828/77	EPI23802	EPI_ISL_4228	Europe / Netherlands	Human	1977	329	unassigned	unassigned	5.42578	-10.1328	1.41309	c1	1976NH	1.37426	NA	NA	NA	NA	NA
A/Bilthoven/3895/77	EPI23800	EPI_ISL_4227	Europe / Netherlands / Provincie Utrecht / Gemeente De Bilt / Bilthoven	Human	1977	329	unassigned	unassigned	5.00391	-9.97656	1.53418	c1	1976NH	1.04998	NA	NA	NA	NA	NA
A/Rotterdam/8179/77	EPI23804	EPI_ISL_4229	Europe / Netherlands	Human	1977	329	unassigned	unassigned	5.41016	-10.1719	1.26074	c1	1976NH	1.49781	NA	NA	NA	NA	NA
A/Amsterdam/1609/77	EPI23868	EPI_ISL_4259	Europe / Netherlands	Human	1977	329	unassigned	unassigned	5.63672	-10.1172	1.23242	c1	1976NH	1.59794	NA	NA	NA	NA	NA
A/Albany/4/1977	EPI59683	EPI_ISL_6980	North America / United States / New York	Human	1977	329	unassigned	unassigned	5.72656	-10.1172	1.16309	c1	1976NH	1.69561	NA	NA	NA	NA	NA
A/Memphis/3/1977	EPI92017	EPI_ISL_9036	North America / United States / Tennessee	Human	1977	329	unassigned	unassigned	4.14453	-8.875	2.87305	c1	1976NH	0.960889	NA	NA	NA	NA	NA
A/Memphis/1/1977	EPI91998	EPI_ISL_9035	North America / United States / Tennessee	Human	1977	329	unassigned	unassigned	4.14453	-8.875	2.87305	c1	1976NH	0.960889	NA	NA	NA	NA	NA
A/Nanjing/49/1977	EPI92074	EPI_ISL_9039	Asia / China / Jiangsu Provice	Human	1977	329	unassigned	unassigned	5.47656	-8.125	6.04297	c1	1976NH	3.94279	NA	NA	NA	NA	NA
A/Memphis/5/1977	EPI92264	EPI_ISL_9049	North America / United States / Tennessee	Human	1977	329	unassigned	unassigned	4.14453	-8.875	2.87305	c1	1976NH	0.960889	NA	NA	NA	NA	NA
A/Memphis/2/1977	EPI95285	EPI_ISL_9208	North America / United States / Tennessee	Human	1977	329	unassigned	unassigned	4.14453	-8.875	2.87305	c1	1976NH	0.960889	NA	NA	NA	NA	NA
A/Memphis/4/1977	EPI95304	EPI_ISL_9209	North America / United States / Tennessee	Human	1977	329	unassigned	unassigned	4.14453	-8.875	2.87305	c1	1976NH	0.960889	NA	NA	NA	NA	NA
A/Texas/1/1977	EPI118998	EPI_ISL_12622	North America / United States / Texas	Human	1977	329	unassigned	unassigned	4.26562	-8.83594	2.95898	c1	1976NH	0.957072	NA	NA	NA	NA	NA
A/England/321/1977	EPI131326	EPI_ISL_14968	Europe / United Kingdom	Human	1977	329	unassigned	unassigned	3.87109	-8.64844	3.09766	c1	1976NH	1.3809	NA	NA	NA	NA	NA
A/Amsterdam/1609/1977	EPI365322	EPI_ISL_114017	Europe / Netherlands	Human	1977	329	unassigned	unassigned	5.63672	-10.1172	1.23242	c1	1976NH	1.59794	NA	NA	NA	NA	NA
A/Rotterdam/5828/1977	EPI365335	EPI_ISL_114019	Europe / Netherlands	Human	1977	329	unassigned	unassigned	5.42578	-10.1328	1.41309	c1	1976NH	1.37426	NA	NA	NA	NA	NA
A/Bilthoven/3895/1977	EPI365330	EPI_ISL_114018	Europe / Netherlands	Human	1977	329	unassigned	unassigned	5.00391	-9.97656	1.53418	c1	1976NH	1.04998	NA	NA	NA	NA	NA
A/Texas/1/1977	EPI365482	EPI_ISL_114197	North America / United States / Texas	Human	1977	329	unassigned	unassigned	4.19141	-8.85156	2.9043	c1	1976NH	0.959827	NA	NA	NA	NA	NA
A/Rotterdam/8179/1977	EPI365474	EPI_ISL_114196	Europe / Netherlands	Human	1977	329	unassigned	unassigned	5.59375	-10.1484	1.28906	c1	1976NH	1.55087	NA	NA	NA	NA	NA
A/Texas/1/1977	EPI377532	EPI_ISL_122019	North America / United States / Texas	Human	1977	329	unassigned	unassigned	4.19141	-8.85156	2.9043	c1	1976NH	0.959827	NA	NA	NA	NA	NA
A/Albany/14/1978	EPI57650	EPI_ISL_6876	North America / United States / New York	Human	1978	329	unassigned	unassigned	3.95312	-9	2.73438	c1	1977NH	0.149812	NA	NA	NA	NA	NA
A/Memphis/16/1978	EPI57878	EPI_ISL_6888	North America / United States / Tennessee	Human	1978	329	unassigned	unassigned	4.08203	-8.94531	2.76953	c1	1977NH	0.0420781	NA	NA	NA	NA	NA
A/Memphis/12/1978	EPI91922	EPI_ISL_9031	North America / United States / Tennessee	Human	1978	329	unassigned	unassigned	4.05469	-8.91406	2.77734	c1	1977NH	0.0231212	NA	NA	NA	NA	NA
A/Memphis/18/1978	EPI91941	EPI_ISL_9032	North America / United States / Tennessee	Human	1978	329	unassigned	unassigned	4.08984	-8.89844	2.82227	c1	1977NH	0.042409	NA	NA	NA	NA	NA
A/Memphis/2/78	EPI91903	EPI_ISL_9030	North America / United States / Tennessee	Human	1978	329	unassigned	unassigned	4.11719	-8.9375	2.75	c1	1977NH	0.0741366	NA	NA	NA	NA	NA
A/Memphis/19/1978	EPI94088	EPI_ISL_9145	North America / United States / Tennessee	Human	1978	329	unassigned	unassigned	4.08203	-8.82812	2.93359	c1	1977NH	0.165315	NA	NA	NA	NA	NA
A/Bangkok/01/1979	EPI104947	EPI_ISL_10250	Asia / Thailand	Human	1979	329	unassigned	unassigned	3.79297	-8.63281	3.23047	c1	1978NH	0.0420857	NA	NA	NA	NA	NA
A/Bangkok/2/1979	EPI118974	EPI_ISL_12615	Asia / Thailand / Phra Nakhon Si Ayutthaya	Human	1979	329	unassigned	unassigned	3.75	-8.67188	3.23633	c1	1978NH	0.0284924	NA	NA	NA	NA	NA
A/Bangkok/1/1979	EPI367158	EPI_ISL_115698	Asia / Thailand	Human	1979	329	unassigned	unassigned	3.82422	-8.67188	3.26562	c1	1978NH	0.0609335	NA	NA	NA	NA	NA
A/Bangkok/1/1979	EPI377537	EPI_ISL_122020	Asia / Thailand / Bangkok	Human	1979	329	unassigned	unassigned	3.69922	-8.64844	3.28125	c1	1978NH	0.0733219	NA	NA	NA	NA	NA
A/Oregon/4/80	EPI9263	EPI_ISL_2095	North America / United States / Oregon	Human	1980	329	unassigned	unassigned	3.71484	-8.85938	2.88281	c1	1979NH	0.487765	NA	NA	NA	NA	NA
A/Rotterdam/577/80	EPI23870	EPI_ISL_4260	Europe / Netherlands	Human	1980	329	unassigned	unassigned	3.98242	-8.75	3.13086	c1	1979NH	0.188421	NA	NA	NA	NA	NA
A/Netherlands/209/80	EPI23872	EPI_ISL_4261	Europe / Netherlands	Human	1980	329	unassigned	unassigned	3.90234	-8.78906	3.01562	c1	1979NH	0.294722	NA	NA	NA	NA	NA
A/Hong Kong/46/1980	EPI84293	EPI_ISL_8668	Asia / Hong Kong (SAR)	Human	1980	329	unassigned	unassigned	3.13672	-7.88672	3.78516	c1	1979NH	1.20224	NA	NA	NA	NA	NA
A/Nanjing/13/1980	EPI90782	EPI_ISL_8972	Asia / China / Jiangsu Provice	Human	1980	329	unassigned	unassigned	4.21875	-8.36719	3.46875	c1	1979NH	0.456456	NA	NA	NA	NA	NA
A/Memphis/9/1980	EPI92378	EPI_ISL_9055	North America / United States / Tennessee	Human	1980	329	unassigned	unassigned	4.09766	-8.74219	3.39844	c1	1979NH	0.241062	NA	NA	NA	NA	NA
A/Memphis/4/1980	EPI94107	EPI_ISL_9146	North America / United States / Tennessee	Human	1980	329	unassigned	unassigned	4.03906	-8.77344	3.30664	c1	1979NH	0.18046	NA	NA	NA	NA	NA
A/Memphis/3/1980	EPI96105	EPI_ISL_9252	North America / United States / Tennessee	Human	1980	329	unassigned	unassigned	4.03906	-8.77344	3.30664	c1	1979NH	0.18046	NA	NA	NA	NA	NA
A/Memphis/1/1980	EPI96561	EPI_ISL_9276	North America / United States / Tennessee	Human	1980	329	unassigned	unassigned	4.03906	-8.77344	3.30664	c1	1979NH	0.18046	NA	NA	NA	NA	NA
A/Rotterdam/577/1980	EPI362468	EPI_ISL_110861	Europe / Netherlands	Human	1980	329	unassigned	unassigned	3.98242	-8.75	3.13086	c1	1979NH	0.188421	NA	NA	NA	NA	NA
A/Netherlands/209/1980	EPI365490	EPI_ISL_114198	Europe / Netherlands	Human	1980-12-01	329	unassigned	unassigned	3.90234	-8.78906	3.01562	c1	1980NH	0.220016	NA	NA	NA	NA	NA
A/Baylor1A/81	EPI239917	EPI_ISL_68874	North America / United States / Texas	Human	1981	329	unassigned	unassigned	3.02344	-7.75781	3.57617	c1	1980NH	1.25194	NA	NA	NA	NA	NA
A/Baylor2A/81	EPI239919	EPI_ISL_68876	North America / United States / Texas	Human	1981	329	unassigned	unassigned	3.90234	-8.78906	3.01562	c1	1980NH	0.220016	NA	NA	NA	NA	NA
A/Bilthoven/4791/81	EPI23806	EPI_ISL_4230	Europe / Netherlands / Provincie Utrecht / Gemeente De Bilt / Bilthoven	Human	1981	329	unassigned	unassigned	3.90234	-8.78906	3.01562	c1	1980NH	0.220016	NA	NA	NA	NA	NA
A/Memphis/1/1981	EPI94126	EPI_ISL_9147	North America / United States / Tennessee	Human	1981	329	unassigned	unassigned	4.03906	-8.77344	3.30664	c1	1980NH	0.324879	NA	NA	NA	NA	NA
A/Bilthoven/4791/1981	EPI362475	EPI_ISL_110862	Europe / Netherlands	Human	1981	329	unassigned	unassigned	3.90234	-8.78906	3.01562	c1	1980NH	0.220016	NA	NA	NA	NA	NA
A/Lyon/2380/1981	EPI365498	EPI_ISL_114199	Europe / France	Human	1981	329	unassigned	unassigned	3.90234	-8.78906	3.01562	c1	1980NH	0.220016	NA	NA	NA	NA	NA
A/Netherlands/233/1982	EPI545279	EPI_ISL_167241	Europe / Netherlands	Human	1982	329	unassigned	unassigned	3.07031	-7.71875	3.67383	c1	1981NH	0.97061	NA	NA	NA	NA	NA
A/Bilthoven/10684/82	EPI23808	EPI_ISL_4231	Europe / Netherlands / Provincie Utrecht / Gemeente De Bilt / Bilthoven	Human	1982	329	unassigned	unassigned	3.97656	-8.98438	2.73047	c1	1981NH	0.868916	NA	NA	NA	NA	NA
A/Netherlands/233/82	EPI23828	EPI_ISL_4239	Europe / Netherlands	Human	1982	329	unassigned	unassigned	2.78516	-7.58594	3.75781	c1	1981NH	1.24829	NA	NA	NA	NA	NA
A/Netherlands/241/82	EPI23874	EPI_ISL_4262	Europe / Netherlands	Human	1982	329	unassigned	unassigned	2.8418	-7.52344	3.86719	c1	1981NH	1.32043	NA	NA	NA	NA	NA
A/Philippines/2/1982	EPI269560	EPI_ISL_76487	Asia / Philippines	Human	1982-06-01	329	unassigned	unassigned	2.47266	-7.39453	3.38867	c1	1982SH	0.262967	NA	NA	NA	NA	NA
A/Philippines/2-MA/1982	EPI269552	EPI_ISL_76486	Asia / Philippines	Human	1982-06-01	329	unassigned	unassigned	2.63281	-7.72656	3.37305	c1	1982SH	0.206499	NA	NA	NA	NA	NA
A/Christ Hospital/231/82	EPI131102	EPI_ISL_14934	Europe / United Kingdom	Human	1982	329	unassigned	unassigned	3.62891	-8.79688	2.88867	c1	1981NH	0.504858	NA	NA	NA	NA	NA
A/Netherlands/241/1982	EPI365514	EPI_ISL_114201	Europe / Netherlands	Human	1982-12-01	329	unassigned	unassigned	2.8418	-7.52344	3.86719	c1	1982NH	0.507306	NA	NA	NA	NA	NA
A/Bilthoven/10684/1982	EPI365506	EPI_ISL_114200	Europe / Netherlands	Human	1982	329	unassigned	unassigned	3.97656	-8.98438	2.73047	c1	1981NH	0.868916	NA	NA	NA	NA	NA
A/Phillipines/2/1982	EPI365522	EPI_ISL_114202	Asia / Philippines	Human	1982	329	unassigned	unassigned	2.50781	-7.39844	3.48242	c1	1981NH	1.42848	NA	NA	NA	NA	NA
A/Netherlands/233/1982	EPI367166	EPI_ISL_115699	Europe / Netherlands	Human	1982-04-01	329	unassigned	unassigned	2.78516	-7.58594	3.75781	c1	1982SH	0.295716	NA	NA	NA	NA	NA
A/Netherlands/233/1982	EPI297812	EPI_ISL_84902	Europe / Netherlands	Human	1982	329	unassigned	unassigned	5.62891	-10.125	1.22754	c1	1981NH	3.33201	NA	NA	NA	NA	NA
A/Auckland/4382/1982	EPI385922	EPI_ISL_124884	Oceania / Australia	Human	1982	329	unassigned	unassigned	4.05469	-8.91406	2.88281	c1	1981NH	0.820397	NA	NA	NA	NA	NA
A/Philippines/2/1982	EPI387630	EPI_ISL_125872	Asia / Philippines	Human	1982	329	unassigned	unassigned	2.47266	-7.39453	3.38867	c1	1981NH	1.43133	NA	NA	NA	NA	NA
A/Oita/3/83	EPI4067	EPI_ISL_902	Asia / Japan / Oita / Oita	Human	1983	329	unassigned	unassigned	3.04492	-6.59766	4.82422	c1	1982NH	1.65484	NA	NA	NA	NA	NA
A/Baylor1B/83	EPI239918	EPI_ISL_68875	North America / United States / Texas	Human	1983	329	unassigned	unassigned	4.07422	-8.82031	3.03516	c1	1982NH	1.48041	NA	NA	NA	NA	NA
A/Baylor2B/83	EPI239920	EPI_ISL_68877	North America / United States / Texas	Human	1983	329	unassigned	unassigned	3.02539	-7.46094	3.91211	c1	1982NH	0.453144	NA	NA	NA	NA	NA
A/Baylor3A/83	EPI239921	EPI_ISL_68878	North America / United States / Texas	Human	1983	329	unassigned	unassigned	3.87109	-8.82812	2.92578	c1	1982NH	1.43779	NA	NA	NA	NA	NA
A/Baylor4A/83	EPI239923	EPI_ISL_68880	North America / United States / Texas	Human	1983	329	unassigned	unassigned	3.95898	-8.84375	2.98242	c1	1982NH	1.46034	NA	NA	NA	NA	NA
A/Baylor5A/83	EPI239925	EPI_ISL_68882	North America / United States / Texas	Human	1983	329	unassigned	unassigned	3.04492	-7.19922	4.35156	c1	1982NH	0.901558	NA	NA	NA	NA	NA
A/Baylor6A/Texas/12835/83	EPI239927	EPI_ISL_68884	North America / United States / Texas	Human	1983	329	unassigned	unassigned	3.37891	-8.07031	3.50586	c1	1982NH	0.364768	NA	NA	NA	NA	NA
A/Oslo/13676/83	EPI23810	EPI_ISL_4232	Europe / Norway	Human	1983	329	unassigned	unassigned	3.22852	-8.82031	2.56055	c1	1982NH	1.53422	NA	NA	NA	NA	NA
A/Memphis/33/1983	EPI29025	EPI_ISL_5105	North America / United States / Tennessee	Human	1983	329	unassigned	unassigned	2.77539	-7.07422	4.47656	c1	1982NH	1.15206	NA	NA	NA	NA	NA
A/Hong Kong/5/83	EPI84882	EPI_ISL_8699	Asia / Hong Kong (SAR)	Human	1983	329	unassigned	unassigned	2.67969	-7.41797	4.21875	c1	1982NH	0.840619	NA	NA	NA	NA	NA
A/Hong Kong/26/1983	EPI84844	EPI_ISL_8697	Asia / Hong Kong (SAR)	Human	1983	329	unassigned	unassigned	2.29492	-6.99219	4.26562	c1	1982NH	1.35967	NA	NA	NA	NA	NA
A/Hong Kong/14/1983	EPI91048	EPI_ISL_8986	Asia / Hong Kong (SAR)	Human	1983	329	unassigned	unassigned	3.34961	-7.5625	3.96094	c1	1982NH	0.370786	NA	NA	NA	NA	NA
A/Nanjing/36/1983	EPI92283	EPI_ISL_9050	Asia / China / Jiangsu Provice	Human	1983	329	unassigned	unassigned	3.61523	-7.27344	4.41406	c1	1982NH	0.962026	NA	NA	NA	NA	NA
A/Oslo/13676/1983	EPI365530	EPI_ISL_114245	Europe / Norway	Human	1983	329	unassigned	unassigned	3.22852	-8.82031	2.56055	c1	1982NH	1.53422	NA	NA	NA	NA	NA
A/Caen/1/84	EPI4065	EPI_ISL_901	Europe / France	Human	1984	329	unassigned	unassigned	2.8418	-6.34766	4.95703	c1	1983NH	1.78557	NA	NA	NA	NA	NA
A/Texas/18088/84	EPI4069	EPI_ISL_903	North America / United States / Texas	Human	1984	329	unassigned	unassigned	0.491943	-6.9375	3.05078	c1	1983NH	1.33686	NA	NA	NA	NA	NA
A/Texas/18733/84	EPI4071	EPI_ISL_904	North America / United States / Texas	Human	1984	329	unassigned	unassigned	0.59375	-6.98438	3.05469	c1	1983NH	1.25466	NA	NA	NA	NA	NA
A/Texas/17988/84	EPI4073	EPI_ISL_905	North America / United States / Texas	Human	1984	329	unassigned	unassigned	0.386475	-6.96875	3.20117	c1	1983NH	1.34945	NA	NA	NA	NA	NA
A/Hong Kong/7/1984	EPI84901	EPI_ISL_8700	Asia / Hong Kong (SAR)	Human	1984	329	unassigned	unassigned	2.39648	-7.09766	4.26953	c1	1983NH	0.946678	NA	NA	NA	NA	NA
A/Hong Kong/4/1984	EPI91067	EPI_ISL_8987	Asia / Hong Kong (SAR)	Human	1984	329	unassigned	unassigned	2.7832	-7.13281	4.41016	c1	1983NH	1.3546	NA	NA	NA	NA	NA
A/Yamagata/96/85	EPI4135	EPI_ISL_936	Asia / Japan	Human	1985	329	unassigned	unassigned	2.87109	-6.66406	4.66797	c1	1984NH	0.196097	NA	NA	NA	NA	NA
A/Yokohama/C5/85	EPI4139	EPI_ISL_938	Asia / Japan	Human	1985	329	unassigned	unassigned	2.81641	-6.46094	4.77734	c1	1984NH	0.431579	NA	NA	NA	NA	NA
A/Tonga/23/85	EPI4143	EPI_ISL_940	Oceania / Tonga	Human	1985	329	unassigned	unassigned	3.35547	-6.01172	4.73438	c1	1984NH	0.918697	NA	NA	NA	NA	NA
A/Cheng-mei/4/85	EPI4147	EPI_ISL_942	Asia / China	Human	1985	329	unassigned	unassigned	2.69336	-7.55078	3.39258	c1	1984NH	1.40645	NA	NA	NA	NA	NA
A/Wellington/4/85	EPI23878	EPI_ISL_1142	Oceania / New Zealand	Human	1985	329	unassigned	unassigned	2.77539	-6.59375	4.74219	c1	1984NH	0.32902	NA	NA	NA	NA	NA
A/Bangkok	EPI239914	EPI_ISL_68871	Asia / Thailand	Human	1985	329	unassigned	unassigned	3.4043	-5.91406	4.86719	c1	1984NH	1.05629	NA	NA	NA	NA	NA
A/Bangkok/25/1985	EPI239916	EPI_ISL_68873	Asia / Thailand	Human	1985	329	unassigned	unassigned	2.25195	-6.44141	4.74219	c1	1984NH	0.804899	NA	NA	NA	NA	NA
A/Baylor3B/85	EPI239922	EPI_ISL_68879	North America / United States / Texas	Human	1985	329	unassigned	unassigned	2.72656	-7.06641	4.42188	c1	1984NH	0.361202	NA	NA	NA	NA	NA
A/Baylor5B/85	EPI239926	EPI_ISL_68883	North America / United States / Texas	Human	1985	329	unassigned	unassigned	4.07812	-8.91406	2.85938	c1	1984NH	2.93345	NA	NA	NA	NA	NA
A/Baylor6B/Texas/25784/85	EPI239928	EPI_ISL_68885	North America / United States / Texas	Human	1985	329	unassigned	unassigned	2.72461	-6.99219	4.55078	c1	1984NH	0.281466	NA	NA	NA	NA	NA
A/Christ_Church/1/1985	EPI239930	EPI_ISL_68887	Oceania / New Zealand	Human	1985	329	unassigned	unassigned	2.91797	-7.05078	4.52344	c1	1984NH	0.240919	NA	NA	NA	NA	NA
A/Fukuoka/C29/1985	EPI239935	EPI_ISL_68892	Asia / Japan	Human	1985	329	unassigned	unassigned	2.90234	-6.5625	5.13672	c1	1984NH	0.626327	NA	NA	NA	NA	NA
A/Gumma/346/1985	EPI239940	EPI_ISL_68897	Asia / Japan	Human	1985	329	unassigned	unassigned	3.41211	-5.91797	4.87109	c1	1984NH	1.05754	NA	NA	NA	NA	NA
A/Mississippi/1/	EPI239948	EPI_ISL_68905	North America / United States / Mississippi	Human	1985	329	unassigned	unassigned	3.12109	-6.63281	4.84375	c1	1984NH	0.377798	NA	NA	NA	NA	NA
A/Michigan/1/1985	EPI239947	EPI_ISL_68904	North America / United States / Michigan	Human	1985	329	unassigned	unassigned	2.7832	-7.13281	4.41016	c1	1984NH	0.387971	NA	NA	NA	NA	NA
A/New_Jersey/4/1985	EPI239950	EPI_ISL_68907	North America / United States / New Jersey	Human	1985	329	unassigned	unassigned	2.7832	-7.13281	4.41016	c1	1984NH	0.387971	NA	NA	NA	NA	NA
A/Stockholm/4/1985	EPI239967	EPI_ISL_68917	Europe / Sweden	Human	1985	329	unassigned	unassigned	3.02148	-6.44531	4.98438	c1	1984NH	0.564531	NA	NA	NA	NA	NA
A/Stockholm/8/1985	EPI239968	EPI_ISL_68918	Europe / Sweden	Human	1985	329	unassigned	unassigned	3.32227	-7.11328	4.23438	c1	1984NH	0.585202	NA	NA	NA	NA	NA
A/Texas/24752/1985	EPI239980	EPI_ISL_68923	North America / United States / Texas	Human	1985	329	unassigned	unassigned	2.75781	-6.97266	4.76172	c1	1984NH	0.312824	NA	NA	NA	NA	NA
A/Netherlands/330/85	EPI23876	EPI_ISL_4263	Europe / Netherlands	Human	1985	329	unassigned	unassigned	2.78516	-7.03906	4.53516	c1	1984NH	0.275689	NA	NA	NA	NA	NA
A/Stockholm/10/85	EPI23882	EPI_ISL_4265	Europe / Sweden	Human	1985	329	unassigned	unassigned	2.72266	-6.58203	4.76172	c1	1984NH	0.375898	NA	NA	NA	NA	NA
A/Guildford/V728/85	EPI23880	EPI_ISL_4264	Europe / United Kingdom	Human	1985	329	unassigned	unassigned	2.77539	-6.59375	4.74219	c1	1984NH	0.32902	NA	NA	NA	NA	NA
A/Memphis/2/85	EPI29063	EPI_ISL_5107	North America / United States / Tennessee	Human	1985	329	unassigned	unassigned	2.72461	-6.99219	4.55078	c1	1984NH	0.281466	NA	NA	NA	NA	NA
A/Memphis/12/1985	EPI34674	EPI_ISL_5395	North America / United States / Tennessee	Human	1985	329	unassigned	unassigned	2.94336	-6.45312	4.91016	c1	1984NH	0.500001	NA	NA	NA	NA	NA
A/Hong Kong/24/1985	EPI84369	EPI_ISL_8672	Asia / Hong Kong (SAR)	Human	1985	329	unassigned	unassigned	3.49609	-6.07031	4.83203	c1	1984NH	0.965333	NA	NA	NA	NA	NA
A/Hong Kong/6/1985	EPI84331	EPI_ISL_8670	Asia / Hong Kong (SAR)	Human	1985	329	unassigned	unassigned	3.2168	-6.61719	4.96484	c1	1984NH	0.523631	NA	NA	NA	NA	NA
A/Hong Kong/7/1985	EPI84407	EPI_ISL_8674	Asia / Hong Kong (SAR)	Human	1985	329	unassigned	unassigned	3.03516	-6.69141	4.73828	c1	1984NH	0.232056	NA	NA	NA	NA	NA
A/Memphis/5/85	EPI96067	EPI_ISL_9250	North America / United States / Tennessee	Human	1985	329	unassigned	unassigned	2.63281	-6.91016	4.54688	c1	1984NH	0.324681	NA	NA	NA	NA	NA
A/Memphis/25/1985	EPI96580	EPI_ISL_9277	North America / United States / Tennessee	Human	1985	329	unassigned	unassigned	2.63086	-6.94141	4.55859	c1	1984NH	0.336584	NA	NA	NA	NA	NA
A/Memphis/7/1985	EPI96675	EPI_ISL_9282	North America / United States / Tennessee	Human	1985	329	unassigned	unassigned	2.4707	-7.11719	4.20312	c1	1984NH	0.667112	NA	NA	NA	NA	NA
A/Mississippi/1/1985	EPI129066	EPI_ISL_14523	North America / United States / Mississippi	Human	1985	329	unassigned	unassigned	3.75391	-8.04688	3.72461	c1	1984NH	1.69774	NA	NA	NA	NA	NA
A/Netherlands/330/1985	EPI365546	EPI_ISL_114247	Europe / Netherlands	Human	1985-01-01	329	unassigned	unassigned	2.75781	-7.07031	4.52344	c1	1984NH	0.318111	NA	NA	NA	NA	NA
A/Guildford/V728/1985	EPI365538	EPI_ISL_114246	Europe / United Kingdom	Human	1985	329	unassigned	unassigned	2.77539	-6.59375	4.74219	c1	1984NH	0.32902	NA	NA	NA	NA	NA
A/Stockholm/10/1985	EPI365562	EPI_ISL_114249	Europe / Sweden	Human	1985	329	unassigned	unassigned	2.72266	-6.58203	4.76172	c1	1984NH	0.375898	NA	NA	NA	NA	NA
A/Netherlands/333/1985	EPI365554	EPI_ISL_114248	Europe / Netherlands	Human	1985-02-01	329	unassigned	unassigned	3.04102	-6.51172	4.89844	c1	1985SH	0	NA	NA	NA	NA	NA
A/Wellington/4/1985	EPI365570	EPI_ISL_114250	Oceania / New Zealand / Wellington	Human	1985	329	unassigned	unassigned	2.83008	-6.64453	4.74219	c1	1984NH	0.270348	NA	NA	NA	NA	NA
A/Czechoslovakia/4/86	EPI4125	EPI_ISL_931	Europe / Czech Republic	Human	1986	329	unassigned	unassigned	3.32227	-7.11328	4.23438	c1	1985NH	0.907794	NA	NA	NA	NA	NA
A/USSR/26/1985	EPI239983	EPI_ISL_68926	Europe / Russian Federation	Human	1986	329	unassigned	unassigned	1.6123	-6.58203	4.5625	c1	1985NH	0.979009	NA	NA	NA	NA	NA
A/Colorado/2/86	EPI23884	EPI_ISL_4266	North America / United States / Colorado	Human	1986	329	unassigned	unassigned	2.51562	-6.41016	4.83203	c1	1985NH	0.409162	NA	NA	NA	NA	NA
A/Memphis/5/1986	EPI34237	EPI_ISL_5372	North America / United States / Tennessee	Human	1986	329	unassigned	unassigned	2.63086	-6.94141	4.55859	c1	1985NH	0.214126	NA	NA	NA	NA	NA
A/Memphis/2/1986	EPI45449	EPI_ISL_6221	North America / United States / Tennessee	Human	1986	329	unassigned	unassigned	2.63086	-6.94141	4.55859	c1	1985NH	0.214126	NA	NA	NA	NA	NA
A/Memphis/3/1986	EPI57897	EPI_ISL_6889	North America / United States / Tennessee	Human	1986	329	unassigned	unassigned	2.24219	-6.88672	4.42188	c1	1985NH	0.406361	NA	NA	NA	NA	NA
A/Memphis/66/1986	EPI79065	EPI_ISL_8198	North America / United States / Tennessee	Human	1986	329	unassigned	unassigned	2.55469	-6.53516	4.79297	c1	1985NH	0.284441	NA	NA	NA	NA	NA
A/Memphis/1/1986	EPI82773	EPI_ISL_8588	North America / United States / Tennessee	Human	1986	329	unassigned	unassigned	2.37891	-6.83984	4.60156	c1	1985NH	0.224769	NA	NA	NA	NA	NA
A/Memphis/11/1986	EPI96694	EPI_ISL_9283	North America / United States / Tennessee	Human	1986	329	unassigned	unassigned	3.32227	-7.11328	4.23438	c1	1985NH	0.907794	NA	NA	NA	NA	NA
A/Mem/6/1986	EPI129642	EPI_ISL_14692	North America / United States	Human	1986	329	unassigned	unassigned	2.88672	-6.64062	4.80859	c1	1985NH	0.387817	NA	NA	NA	NA	NA
A/Colorado/2/1986	EPI365578	EPI_ISL_114293	North America / United States / Colorado	Human	1986	329	unassigned	unassigned	2.51562	-6.41016	4.83203	c1	1985NH	0.409162	NA	NA	NA	NA	NA
A/Leningrad/360/1986	EPI4137	EPI_ISL_124927	Europe / Russian Federation	Human	1986	329	unassigned	unassigned	2.44922	-6.58594	4.62109	c1	1985NH	0.200536	NA	NA	NA	NA	NA
A/Leningrad/360/1986	EPI385984	EPI_ISL_124928	Europe / Russian Federation	Human	1986	329	unassigned	unassigned	2.45898	-6.57812	4.66016	c1	1985NH	0.20944	NA	NA	NA	NA	NA
A/Colorado/2/1987	EPI239932	EPI_ISL_68889	North America / United States / Colorado	Human	1987	329	unassigned	unassigned	2.24023	-5.81641	5.125	c1	1986NH	0.79319	NA	NA	NA	NA	NA
A/Guizhou/1/1987	EPI239938	EPI_ISL_68895	Asia / China	Human	1987	329	unassigned	unassigned	2.27148	-6.29688	4.89062	c1	1986NH	0.655657	NA	NA	NA	NA	NA
A/Guangdong/9/1987	EPI239937	EPI_ISL_68894	Asia / China	Human	1987	329	unassigned	unassigned	3.89062	-5.10547	4.24609	c1	1986NH	1.49583	NA	NA	NA	NA	NA
A/Los_Angeles/1987	EPI239945	EPI_ISL_68902	North America / United States / California	Human	1987	329	unassigned	unassigned	2.99414	-6.52344	4.71094	c1	1986NH	0.452466	NA	NA	NA	NA	NA
A/Guizhou/3/1987	EPI239939	EPI_ISL_68896	Asia / China	Human	1987	329	unassigned	unassigned	3.35742	-8.20312	3.61914	c1	1986NH	2.43756	NA	NA	NA	NA	NA
A/Shanghai/11/1987	EPI239952	EPI_ISL_68909	Asia / China	Human	1987	329	unassigned	unassigned	2.44336	-5.97266	5.21484	c1	1986NH	0.65759	NA	NA	NA	NA	NA
A/Shanghai/11/1987/X99a/high yield reassortant	EPI239954	EPI_ISL_68911	Asia / China	Human	1987	329	unassigned	unassigned	1.8418	-5.86328	5.21094	c1	1986NH	1.15899	NA	NA	NA	NA	NA
A/Shanghai/11/1987/X99/high yielding reassortant	EPI239953	EPI_ISL_68910	Asia / China	Human	1987	329	unassigned	unassigned	2.36719	-6.53906	4.76953	c1	1986NH	0.677878	NA	NA	NA	NA	NA
A/Shichuan/2/87	EPI239956	EPI_ISL_68913	Asia / China	Human	1987	329	unassigned	unassigned	3.80664	-5.16406	4.24219	c1	1986NH	1.40196	NA	NA	NA	NA	NA
A/Sichuan/2/1987	EPI239955	EPI_ISL_68912	Asia / China	Human	1987	329	unassigned	unassigned	3.89062	-5.10547	4.24609	c1	1986NH	1.49583	NA	NA	NA	NA	NA
A/Qingdao/10/1987	EPI239951	EPI_ISL_68908	Asia / China	Human	1987	329	unassigned	unassigned	2.16406	-5.96094	5.11328	c1	1986NH	0.815083	NA	NA	NA	NA	NA
A/Sichuan/2/87	EPI239957	EPI_ISL_68914	Asia / China	Human	1987	329	unassigned	unassigned	3.80664	-5.16406	4.24219	c1	1986NH	1.40196	NA	NA	NA	NA	NA
A/Tokyo/1276/1987	EPI239982	EPI_ISL_68925	Asia / Japan	Human	1987	329	unassigned	unassigned	2.97461	-6.50781	4.67969	c1	1986NH	0.434873	NA	NA	NA	NA	NA
A/Tokyo/1275/1987	EPI239981	EPI_ISL_68924	Asia / Japan	Human	1987	329	unassigned	unassigned	2.12695	-6.125	4.98047	c1	1986NH	0.786853	NA	NA	NA	NA	NA
A/Sydney/1/1987	EPI239977	EPI_ISL_68921	Oceania / Australia / New South Wales	Human	1987	329	unassigned	unassigned	1.86719	-5.84766	5.17578	c1	1986NH	1.12529	NA	NA	NA	NA	NA
A/Victoria/7/1987	EPI239984	EPI_ISL_68927	Oceania / Australia / Victoria	Human	1987	329	unassigned	unassigned	2.42773	-6.03906	5.15625	c1	1986NH	0.617808	NA	NA	NA	NA	NA
A/Victoria/7/1987	EPI2186860	EPI_ISL_15146330	Oceania / Australia / Victoria	Human	1987	329	unassigned	unassigned	2.25	-6.15234	5.05078	c1	1986NH	0.702819	NA	NA	NA	NA	NA
A/Hong Kong/7/1987	EPI84426	EPI_ISL_8675	Asia / Hong Kong (SAR)	Human	1987	329	unassigned	unassigned	3.41602	-4.80859	4.63672	c1	1986NH	1.39363	NA	NA	NA	NA	NA
A/Shanghai/11/1987/low yield	EPI129120	EPI_ISL_109069	Asia / China	Human	1987	329	unassigned	unassigned	3.41602	-6.88672	4.44531	c1	1986NH	1.00725	NA	NA	NA	NA	NA
A/Shanghai/11/1987/high yield	EPI129118	EPI_ISL_109068	Asia / China	Human	1987	329	unassigned	unassigned	2.44336	-5.97266	5.21484	c1	1986NH	0.65759	NA	NA	NA	NA	NA
A/Sichuan/2/1987	EPI362501	EPI_ISL_110865	Asia / China	Human	1987	329	unassigned	unassigned	2.50391	-6.66016	4.94531	c1	1986NH	0.713459	NA	NA	NA	NA	NA
A/Shanghai/11/1987	EPI365585	EPI_ISL_114294	Asia / China	Human	1987	329	unassigned	unassigned	3.33789	-6.80078	4.42969	c1	1986NH	0.902716	NA	NA	NA	NA	NA
A/Sichuan/2/1987	EPI387670	EPI_ISL_125877	Asia / China	Human	1987	329	unassigned	unassigned	3.71484	-5.76562	4.625	c1	1986NH	0.908669	NA	NA	NA	NA	NA
A/Shanghai/11/1987	EPI390002	EPI_ISL_127587	Asia / China	Human	1987	329	unassigned	unassigned	3.37109	-6.83594	4.53906	c1	1986NH	0.919048	NA	NA	NA	NA	NA
A/Chiba/38/88	EPI4091	EPI_ISL_914	Asia / Japan	Human	1988	329	unassigned	unassigned	2.42773	-6.03906	5.15625	c1	1987NH	0.253325	NA	NA	NA	NA	NA
A/Kobe/768/88	EPI4093	EPI_ISL_915	Asia / Japan	Human	1988	329	unassigned	unassigned	1.95312	-5.92578	5.08203	c1	1987NH	0.647866	NA	NA	NA	NA	NA
A/Christ_Church/2/88	EPI4141	EPI_ISL_939	North America / Barbados / Christ Church	Human	1988	329	unassigned	unassigned	3.33398	-7.13672	4.13672	c1	1987NH	1.55809	NA	NA	NA	NA	NA
A/Uruguay/3/88	EPI4149	EPI_ISL_943	South America / Uruguay	Human	1988	329	unassigned	unassigned	2.44727	-6.97266	4.56641	c1	1987NH	1.01179	NA	NA	NA	NA	NA
A/England/427/88	EPI23888	EPI_ISL_1451	Europe / United Kingdom	Human	1988	329	unassigned	unassigned	2.64844	-6.24609	5.05078	c1	1987NH	0.235153	NA	NA	NA	NA	NA
A/Seoul/11/88	EPI8892	EPI_ISL_2026	Asia / Korea, Republic of	Human	1988	329	unassigned	unassigned	2.19336	-6.17188	4.9375	c1	1987NH	0.40328	NA	NA	NA	NA	NA
A/Berlin/6/88	EPI11548	EPI_ISL_2461	Europe / Germany / Berlin	Human	1988	329	unassigned	unassigned	3.3457	-5.9375	4.92969	c1	1987NH	0.777403	NA	NA	NA	NA	NA
A/Cottbus/42/88	EPI11552	EPI_ISL_2463	Europe / Germany / Brandenburg	Human	1988	329	unassigned	unassigned	2.64648	-6.42578	4.96484	c1	1987NH	0.386717	NA	NA	NA	NA	NA
A/England/88	EPI239934	EPI_ISL_68891	Europe / United Kingdom	Human	1988	329	unassigned	unassigned	1.91406	-6.10938	5.33203	c1	1987NH	0.766525	NA	NA	NA	NA	NA
A/Stockholm/12/88	EPI23890	EPI_ISL_4268	Europe / Sweden	Human	1988	329	unassigned	unassigned	3.01172	-6.53516	4.70703	c1	1987NH	0.699121	NA	NA	NA	NA	NA
A/Netherlands/450/88	EPI23886	EPI_ISL_4267	Europe / Netherlands	Human	1988	329	unassigned	unassigned	2.64844	-6.41797	4.96484	c1	1987NH	0.37941	NA	NA	NA	NA	NA
A/Memphis/8/1988	EPI33052	EPI_ISL_5310	North America / United States / Tennessee	Human	1988	329	unassigned	unassigned	2.42773	-6.03906	5.15625	c1	1987NH	0.253325	NA	NA	NA	NA	NA
A/Hokkaido/1/1988	EPI80658	EPI_ISL_8294	Asia / Japan / Hokkaido	Human	1988	329	unassigned	unassigned	3.46289	-5.08203	4.21094	c1	1987NH	1.50428	NA	NA	NA	NA	NA
A/Memphis/13/1988	EPI83989	EPI_ISL_8652	North America / United States / Tennessee	Human	1988	329	unassigned	unassigned	2.13867	-5.97656	5.15625	c1	1987NH	0.488149	NA	NA	NA	NA	NA
A/Hong Kong/2/1988	EPI84350	EPI_ISL_8671	Asia / Hong Kong (SAR)	Human	1988	329	unassigned	unassigned	2.13867	-5.97656	5.15625	c1	1987NH	0.488149	NA	NA	NA	NA	NA
A/Memphis/5/1988	EPI96713	EPI_ISL_9284	North America / United States / Tennessee	Human	1988	329	unassigned	unassigned	2.42773	-6.03906	5.15625	c1	1987NH	0.253325	NA	NA	NA	NA	NA
A/Atlanta/3572/1988	EPI365593	EPI_ISL_114295	North America / United States	Human	1988	329	unassigned	unassigned	3.43164	-4.81641	4.63672	c1	1987NH	1.53035	NA	NA	NA	NA	NA
A/Netherlands/450/1988	EPI365609	EPI_ISL_114297	Europe / Netherlands	Human	1988-03-01	329	unassigned	unassigned	3.58398	-5.14062	4.5	c1	1988SH	0.987923	NA	NA	NA	NA	NA
A/England/427/1988	EPI365601	EPI_ISL_114296	Europe / United Kingdom	Human	1988	329	unassigned	unassigned	2.78125	-5.12109	5.19141	c1	1987NH	0.977149	NA	NA	NA	NA	NA
A/Stockholm/12/1988	EPI365617	EPI_ISL_114298	Europe / Sweden	Human	1988	329	unassigned	unassigned	2.44727	-6.04688	5.15234	c1	1987NH	0.23901	NA	NA	NA	NA	NA
A/Victoria/1/1988	EPI367174	EPI_ISL_115700	Oceania / Australia	Human	1988	329	unassigned	unassigned	2.13867	-5.97656	5.15625	c1	1987NH	0.488149	NA	NA	NA	NA	NA
A/Oklahoma/5/1988	EPI367182	EPI_ISL_115768	North America / United States / Oklahoma	Human	1988	329	unassigned	unassigned	2.13477	-5.96875	5.17188	c1	1987NH	0.499521	NA	NA	NA	NA	NA
A/Siena/3/1988	EPI165657	EPI_ISL_25040	Europe / Italy / Tuscany / Province of Siena	Human	1988-02-05	329	unassigned	unassigned	1.86719	-5.84766	5.17578	c1	1988SH	0.987923	NA	NA	NA	NA	NA
A/Beijing/57/89	EPI3655	EPI_ISL_699	Asia / China	Human	1989	329	unassigned	unassigned	2.43164	-6.55469	4.89844	c1	1988NH	0.654056	NA	NA	NA	NA	NA
A/England/648/89	EPI3659	EPI_ISL_701	Europe / United Kingdom	Human	1989	329	unassigned	unassigned	2.15625	-6.39844	4.89453	c1	1988NH	0.4354	NA	NA	NA	NA	NA
A/Guizhou/54/89	EPI78085	EPI_ISL_702	Asia / China	Human	1989	329	unassigned	unassigned	2.36719	-6.59375	4.92969	c1	1988NH	0.655765	NA	NA	NA	NA	NA
A/Shanghai/1/89	EPI3669	EPI_ISL_706	Asia / China	Human	1989	329	unassigned	unassigned	2.43164	-6.55469	4.89844	c1	1988NH	0.654056	NA	NA	NA	NA	NA
A/Guangdong/39/89	EPI129068	EPI_ISL_703	Asia / China / Guangdong Province	Human	1989	329	unassigned	unassigned	2.40234	-6.63672	4.87109	c1	1988NH	0.720505	NA	NA	NA	NA	NA
A/Victoria/5/89	EPI3677	EPI_ISL_710	Oceania / Australia / Victoria	Human	1989	329	unassigned	unassigned	1.16406	-6.17969	5.05859	c1	1988NH	0.986591	NA	NA	NA	NA	NA
A/Shanghai/16/89	EPI3667	EPI_ISL_705	Asia / China	Human	1989	329	unassigned	unassigned	2.37109	-6.61328	4.88281	c1	1988NH	0.68523	NA	NA	NA	NA	NA
A/Beijing/353/89	EPI131538	EPI_ISL_721	Asia / China	Human	1989	329	unassigned	unassigned	1.28906	-6.08203	4.77734	c1	1988NH	0.892507	NA	NA	NA	NA	NA
A/Netherlands/620/89	EPI23912	EPI_ISL_1588	Europe / Netherlands	Human	1989	329	unassigned	unassigned	1.89551	-6.10156	5.33203	c1	1988NH	0.381111	NA	NA	NA	NA	NA
A/Netherlands/650/89	EPI23914	EPI_ISL_1591	Europe / Netherlands	Human	1989	329	unassigned	unassigned	2.78125	-5.12109	5.19141	c1	1988NH	1.09591	NA	NA	NA	NA	NA
A/Seoul/16/89	EPI8894	EPI_ISL_2027	Asia / Korea, Republic of	Human	1989	329	unassigned	unassigned	3.11914	-5.36719	2.96094	c1	1988NH	2.39719	NA	NA	NA	NA	NA
A/Guangdong/89	EPI239936	EPI_ISL_68893	Asia / China	Human	1989	329	unassigned	unassigned	2.37109	-6.61328	4.88281	c1	1988NH	0.68523	NA	NA	NA	NA	NA
A/Sichuan/89	EPI239958	EPI_ISL_68915	Asia / China	Human	1989	329	unassigned	unassigned	2.43945	-6.55469	4.89062	c1	1988NH	0.659552	NA	NA	NA	NA	NA
A/Netherlands/620/1989	EPI545280	EPI_ISL_167242	Europe / Netherlands	Human	1989	329	unassigned	unassigned	1.89551	-6.10156	5.33203	c1	1988NH	0.381111	NA	NA	NA	NA	NA
A/Netherlands/738/89	EPI23836	EPI_ISL_4243	Europe / Netherlands	Human	1989	329	unassigned	unassigned	3.02539	-5.00781	4.42188	c1	1988NH	1.4726	NA	NA	NA	NA	NA
A/Wellington/5/89	EPI23894	EPI_ISL_4270	Oceania / New Zealand	Human	1989	329	unassigned	unassigned	1.89551	-6.10156	5.33203	c1	1988NH	0.381111	NA	NA	NA	NA	NA
A/Singapore/35/89	EPI23900	EPI_ISL_4273	Asia / Singapore	Human	1989	329	unassigned	unassigned	1.89551	-6.10156	5.33203	c1	1988NH	0.381111	NA	NA	NA	NA	NA
A/Singapore/34/89	EPI23898	EPI_ISL_4272	Asia / Singapore	Human	1989	329	unassigned	unassigned	1.89551	-6.10156	5.33203	c1	1988NH	0.381111	NA	NA	NA	NA	NA
A/Hongkong/1/89	EPI23896	EPI_ISL_4271	Asia / Hong Kong (SAR)	Human	1989	329	unassigned	unassigned	0.967285	-5.71875	5.28516	c1	1988NH	1.21986	NA	NA	NA	NA	NA
A/Singapore/36/89	EPI23902	EPI_ISL_4274	Asia / Singapore	Human	1989	329	unassigned	unassigned	1.89551	-6.10156	5.33203	c1	1988NH	0.381111	NA	NA	NA	NA	NA
A/Singapore/53/89	EPI23906	EPI_ISL_4276	Asia / Singapore	Human	1989	329	unassigned	unassigned	1.90527	-6.08984	5.32422	c1	1988NH	0.36611	NA	NA	NA	NA	NA
A/Victoria/1/89	EPI23908	EPI_ISL_4277	Oceania / Australia / Victoria	Human	1989	329	unassigned	unassigned	3.89062	-5.10547	4.24609	c1	1988NH	2.12873	NA	NA	NA	NA	NA
A/Singapore/40/89	EPI23904	EPI_ISL_4275	Asia / Singapore	Human	1989	329	unassigned	unassigned	1.89551	-6.10156	5.33203	c1	1988NH	0.381111	NA	NA	NA	NA	NA
A/Atlanta/211/89	EPI23920	EPI_ISL_4280	North America / United States / Georgia	Human	1989	329	unassigned	unassigned	1.90234	-6.08594	5.34766	c1	1988NH	0.384524	NA	NA	NA	NA	NA
A/Hokkaido/20/89	EPI80672	EPI_ISL_8278	Asia / Japan / Hokkaido	Human	1989	329	unassigned	unassigned	3.37891	-4.89844	4.61328	c1	1988NH	1.71662	NA	NA	NA	NA	NA
A/Beijin/352/1989	EPI80656	EPI_ISL_8293	Asia / China	Human	1989	329	unassigned	unassigned	1.49902	-6.05859	5.23828	c1	1988NH	0.66336	NA	NA	NA	NA	NA
A/Bangkok/235/89	EPI80676	EPI_ISL_8300	Asia / Thailand	Human	1989	329	unassigned	unassigned	1.7998	-6.64062	4.62891	c1	1988NH	0.842571	NA	NA	NA	NA	NA
A/OMS/7026/89	EPI80680	EPI_ISL_8301	Europe / France	Human	1989	329	unassigned	unassigned	2.57617	-6.71484	4.72266	c1	1988NH	0.90877	NA	NA	NA	NA	NA
A/Netherlands/620/1989	EPI1868433	EPI_ISL_2402550	Europe / Netherlands	Human	1989-01-01	329	unassigned	unassigned	1.89551	-6.10156	5.33203	c1	1988NH	0.381111	NA	NA	NA	NA	NA
A/Geneva/5007/1989	EPI362521	EPI_ISL_110907	Europe / Switzerland	Human	1989	329	unassigned	unassigned	1.68359	-5.73438	5.69141	c1	1988NH	0.821935	NA	NA	NA	NA	NA
A/Beijing/352/1989	EPI362508	EPI_ISL_110905	Asia / China	Human	1989	329	unassigned	unassigned	0.454834	-5.49609	5.28906	c1	1988NH	1.76618	NA	NA	NA	NA	NA
A/Singapore/53/1989	EPI362534	EPI_ISL_110909	Asia / Singapore	Human	1989	329	unassigned	unassigned	1.82812	-6.05859	5.25	c1	1988NH	0.36813	NA	NA	NA	NA	NA
A/Hong Kong/1/1989	EPI362528	EPI_ISL_110908	Asia / Hong Kong (SAR)	Human	1989	329	unassigned	unassigned	1.99707	-6.17188	5.32812	c1	1988NH	0.353885	NA	NA	NA	NA	NA
A/Eindhoven/3447/1989	EPI362515	EPI_ISL_110906	Europe / Netherlands	Human	1989	329	unassigned	unassigned	2.68555	-6.44922	4.87891	c1	1988NH	0.737033	NA	NA	NA	NA	NA
A/Singapore/13/1989	EPI129180	EPI_ISL_14564	Asia / Singapore	Human	1989	329	unassigned	unassigned	1.89551	-6.10156	5.33203	c1	1988NH	0.381111	NA	NA	NA	NA	NA
A/Singapore/12/1989	EPI129172	EPI_ISL_14562	Asia / Singapore	Human	1989	329	unassigned	unassigned	2.02734	-6.5	5.16406	c1	1988NH	0.528504	NA	NA	NA	NA	NA
A/Atlanta/211/1989	EPI365626	EPI_ISL_114345	North America / United States	Human	1989	329	unassigned	unassigned	1.90234	-6.08594	5.34766	c1	1988NH	0.384524	NA	NA	NA	NA	NA
A/Netherlands/620/1989	EPI365642	EPI_ISL_114347	Europe / Netherlands	Human	1989-11-27	329	unassigned	unassigned	1.89551	-6.10156	5.33203	c1	1989NH	0.393463	NA	NA	NA	NA	NA
A/England/138/1989	EPI365634	EPI_ISL_114346	Europe / United Kingdom	Human	1989	329	unassigned	unassigned	2.78906	-6.25391	5.14062	c1	1988NH	0.710957	NA	NA	NA	NA	NA
A/Netherlands/738/1989	EPI365658	EPI_ISL_114349	Europe / Netherlands	Human	1989-12-17	329	unassigned	unassigned	3.02539	-5.00781	4.42188	c1	1989NH	1.46937	NA	NA	NA	NA	NA
A/Netherlands/650/1989	EPI365650	EPI_ISL_114348	Europe / Netherlands	Human	1989-12-13	329	unassigned	unassigned	2.78125	-5.12109	5.19141	c1	1989NH	1.04148	NA	NA	NA	NA	NA
A/Singapore/40/1989	EPI365688	EPI_ISL_114398	Asia / Singapore	Human	1989	329	unassigned	unassigned	1.89551	-6.10156	5.33203	c1	1988NH	0.381111	NA	NA	NA	NA	NA
A/Singapore/35/1989	EPI365680	EPI_ISL_114397	Asia / Singapore	Human	1989	329	unassigned	unassigned	1.89551	-6.10156	5.33203	c1	1988NH	0.381111	NA	NA	NA	NA	NA
A/Singapore/34/1989	EPI365719	EPI_ISL_114396	Asia / Singapore	Human	1989	329	unassigned	unassigned	1.97168	-6.10938	5.35938	c1	1988NH	0.364085	NA	NA	NA	NA	NA
A/Victoria/1/1989	EPI365696	EPI_ISL_114399	Oceania / Australia / Victoria	Human	1989	329	unassigned	unassigned	3.89062	-5.10547	4.24609	c1	1988NH	2.12873	NA	NA	NA	NA	NA
A/Waikato/1/1989	EPI365712	EPI_ISL_114401	Oceania / New Zealand / Waikato	Human	1989	329	unassigned	unassigned	2.78125	-5.12109	5.19141	c1	1988NH	1.09591	NA	NA	NA	NA	NA
A/Wellington/5/1989	EPI365704	EPI_ISL_114400	Oceania / New Zealand / Wellington	Human	1989	329	unassigned	unassigned	1.89551	-6.10156	5.33203	c1	1988NH	0.381111	NA	NA	NA	NA	NA
A/Singapore/36/1989	EPI366865	EPI_ISL_115411	Asia / Singapore	Human	1989	329	unassigned	unassigned	1.89551	-6.10156	5.33203	c1	1988NH	0.381111	NA	NA	NA	NA	NA
A/Beijing/353/1989	EPI367190	EPI_ISL_115769	Asia / China	Human	1989	329	unassigned	unassigned	0.454834	-5.49609	5.28906	c1	1988NH	1.76618	NA	NA	NA	NA	NA
A/Beijing/353/1989	EPI381895	EPI_ISL_123212	Asia / China	Human	1989	329	unassigned	unassigned	1.94727	-4.82031	5.07812	c1	1988NH	1.18852	NA	NA	NA	NA	NA
A/Eindhoven/3447/1989	EPI385932	EPI_ISL_124891	Europe / Netherlands	Human	1989	329	unassigned	unassigned	3.43164	-4.81641	4.63672	c1	1988NH	1.80203	NA	NA	NA	NA	NA
A/Victoria/5/1989	EPI2120580	EPI_ISL_14284897	Oceania / Australia / Victoria	Human	1989	329	unassigned	unassigned	1.99902	-6.46875	5.19922	c1	1988NH	0.514222	NA	NA	NA	NA	NA
A/Netherlands/620/1989	EPI2120357	EPI_ISL_14284838	Europe / Netherlands / South Holland / Gemeente Rotterdam	Human	1989	329	unassigned	unassigned	1.89551	-6.10156	5.33203	c1	1988NH	0.381111	NA	NA	NA	NA	NA
A/Shanghai/24/90	EPI23926	EPI_ISL_697	Asia / China	Human	1990	329	unassigned	unassigned	3.86133	-5.82422	4.21875	c1	1989NH	2.07253	NA	NA	NA	NA	NA
A/Puerto_Rico/1/90	EPI3697	EPI_ISL_720	North America / Puerto Rico	Human	1990	329	unassigned	unassigned	1.27051	-5.99219	4.71094	c1	1989NH	0.844982	NA	NA	NA	NA	NA
A/Shanghai/6/90	EPI3703	EPI_ISL_723	Asia / China	Human	1990	329	unassigned	unassigned	2.01367	-4.80078	5.02734	c1	1989NH	0.995076	NA	NA	NA	NA	NA
A/Seoul/22/90	EPI8898	EPI_ISL_2029	Asia / Korea, Republic of	Human	1990	329	unassigned	unassigned	0.753906	-5.61328	5.19922	c1	1989NH	1.2517	NA	NA	NA	NA	NA
A/Memphis/2/1990	EPI34693	EPI_ISL_4278	North America / United States / Tennessee	Human	1990	329	unassigned	unassigned	1.50488	-5.85938	5.63281	c1	1989NH	0.717676	NA	NA	NA	NA	NA
A/Seoul/1/90	EPI23922	EPI_ISL_4281	Asia / Korea, Republic of	Human	1990	329	unassigned	unassigned	1.89551	-6.10156	5.33203	c1	1989NH	0.393463	NA	NA	NA	NA	NA
A/Victoria/2/90	EPI23924	EPI_ISL_4282	Oceania / Australia / Victoria	Human	1990	329	unassigned	unassigned	0.773438	-5.60938	5.20703	c1	1989NH	1.2336	NA	NA	NA	NA	NA
A/Bangkok/139/90	EPI80682	EPI_ISL_8302	Asia / Thailand	Human	1990	329	unassigned	unassigned	2.59375	-6.67578	4.73047	c1	1989NH	1.13492	NA	NA	NA	NA	NA
A/Bangkok/144/90	EPI80684	EPI_ISL_8303	Asia / Thailand	Human	1990	329	unassigned	unassigned	2.71289	-5.53906	5.25	c1	1989NH	0.77971	NA	NA	NA	NA	NA
A/Memphis/1/90	EPI83305	EPI_ISL_8616	North America / United States / Tennessee	Human	1990	329	unassigned	unassigned	1.7168	-5.89844	5.43359	c1	1989NH	0.437976	NA	NA	NA	NA	NA
A/Memphis/7/1990	EPI96751	EPI_ISL_9286	North America / United States / Tennessee	Human	1990	329	unassigned	unassigned	2.12891	-6.10938	5.46484	c1	1989NH	0.497633	NA	NA	NA	NA	NA
A/Memphis/2/1990	EPI365722	EPI_ISL_114452	North America / United States	Human	1990	329	unassigned	unassigned	1.50488	-5.85938	5.63281	c1	1989NH	0.717676	NA	NA	NA	NA	NA
A/Memphis/5/1990	EPI365730	EPI_ISL_114453	North America / United States	Human	1990	329	unassigned	unassigned	1.50488	-5.85938	5.63281	c1	1989NH	0.717676	NA	NA	NA	NA	NA
A/Suita/1/1990	EPI365746	EPI_ISL_114455	Asia / Japan	Human	1990	329	unassigned	unassigned	1.89551	-6.10156	5.33203	c1	1989NH	0.393463	NA	NA	NA	NA	NA
A/Shanghai/24/1990	EPI365738	EPI_ISL_114454	Asia / China	Human	1990	329	unassigned	unassigned	3.86133	-5.82422	4.21875	c1	1989NH	2.07253	NA	NA	NA	NA	NA
A/Victoria/2/1990	EPI365754	EPI_ISL_114456	Oceania / Australia / Victoria	Human	1990	329	unassigned	unassigned	0.773438	-5.60938	5.20703	c1	1989NH	1.2336	NA	NA	NA	NA	NA
A/Wellington/3/1990	EPI365763	EPI_ISL_114457	Oceania / New Zealand / Wellington	Human	1990	329	unassigned	unassigned	0.773438	-5.60938	5.20703	c1	1989NH	1.2336	NA	NA	NA	NA	NA
A/Siena/4/1990	EPI165665	EPI_ISL_25041	Europe / Italy / Tuscany / Province of Siena	Human	1990-01-08	329	unassigned	unassigned	2.43164	-6.55469	4.89844	c1	1989NH	0.905859	NA	NA	NA	NA	NA
A/Siena/10/1990	EPI165673	EPI_ISL_25042	Europe / Italy / Tuscany / Province of Siena	Human	1990-01-18	329	unassigned	unassigned	1.62598	-5.98828	5.375	c1	1989NH	0.491879	NA	NA	NA	NA	NA
A/Brisbane/1/1990	EPI2120257	EPI_ISL_14284801	Oceania / Australia / Queensland	Human	1990	329	unassigned	unassigned	2.01367	-4.80078	5.02734	c1	1989NH	0.995076	NA	NA	NA	NA	NA
A/South Australia/1/1990	EPI2120448	EPI_ISL_14284857	Oceania / Australia / South Australia	Human	1990	329	unassigned	unassigned	2.43164	-6.55469	4.89844	c1	1989NH	0.905859	NA	NA	NA	NA	NA
A/Kamata/14/91	EPI303	EPI_ISL_121	Asia / Japan	Human	1991	329	unassigned	unassigned	1.13184	-5.75781	5.26172	c1	1990NH	0.292106	NA	NA	NA	NA	NA
A/South_Dakota/1/91	EPI3681	EPI_ISL_712	North America / United States / South Dakota	Human	1991	329	unassigned	unassigned	0.749512	-5.60547	5.09375	c1	1990NH	0.403648	NA	NA	NA	NA	NA
A/Washington/15/91	EPI3683	EPI_ISL_713	North America / United States / Washington	Human	1991	329	unassigned	unassigned	1.25	-5.98438	4.59766	c1	1990NH	0.453325	NA	NA	NA	NA	NA
A/Seoul/45/91	EPI3687	EPI_ISL_715	Asia / Korea, Republic of	Human	1991	329	unassigned	unassigned	1.28906	-6	4.58594	c1	1990NH	0.484941	NA	NA	NA	NA	NA
A/Pennsylvania/09/91	EPI3689	EPI_ISL_716	North America / United States / Pennsylvania	Human	1991	329	unassigned	unassigned	1.18848	-6.08984	4.38672	c1	1990NH	0.664991	NA	NA	NA	NA	NA
A/Indiana/3/91	EPI3693	EPI_ISL_718	North America / United States / Indiana	Human	1991	329	unassigned	unassigned	1.27051	-5.99219	4.71094	c1	1990NH	0.37727	NA	NA	NA	NA	NA
A/Shiga/2/91	EPI3695	EPI_ISL_719	Asia / Japan	Human	1991	329	unassigned	unassigned	1.27051	-5.99219	4.71094	c1	1990NH	0.37727	NA	NA	NA	NA	NA
A/Hawaii/1/91	EPI6400	EPI_ISL_722	North America / United States / Hawaii	Human	1991	329	unassigned	unassigned	2.69922	-7.32812	4.37109	c1	1990NH	2.3036	NA	NA	NA	NA	NA
A/England/261/91	EPI3707	EPI_ISL_725	Europe / United Kingdom	Human	1991	329	unassigned	unassigned	0.508301	-5.38281	5.15625	c1	1990NH	0.733407	NA	NA	NA	NA	NA
A/Paris/80/91	EPI3735	EPI_ISL_739	Europe / France	Human	1991	329	unassigned	unassigned	1.54395	-6.02344	4.8125	c1	1990NH	0.538313	NA	NA	NA	NA	NA
A/Siena/3/1991	EPI190228	EPI_ISL_33841	Europe / Italy / Tuscany / Province of Siena	Human	1991-12-19	329	unassigned	unassigned	1.25	-5.98438	4.59766	c1	1991NH	0.416794	NA	NA	NA	NA	NA
A/Seoul/50/91	EPI8896	EPI_ISL_2028	Asia / Korea, Republic of	Human	1991	329	unassigned	unassigned	1.59375	-6.23438	4.78906	c1	1990NH	0.694974	NA	NA	NA	NA	NA
A/Seoul/23/91	EPI8900	EPI_ISL_2030	Asia / Korea, Republic of	Human	1991	329	unassigned	unassigned	0.958984	-5.78125	5.06641	c1	1990NH	0.151926	NA	NA	NA	NA	NA
A/Seoul/44/91	EPI8902	EPI_ISL_2031	Asia / Korea, Republic of	Human	1991	329	unassigned	unassigned	0.753906	-5.61328	5.19922	c1	1990NH	0.438695	NA	NA	NA	NA	NA
A/Seoul/46/91	EPI8904	EPI_ISL_2032	Asia / Korea, Republic of	Human	1991	329	unassigned	unassigned	0.753906	-5.61328	5.19922	c1	1990NH	0.438695	NA	NA	NA	NA	NA
A/Seoul/47/91	EPI8906	EPI_ISL_2033	Asia / Korea, Republic of	Human	1991	329	unassigned	unassigned	0.753906	-5.61328	5.19922	c1	1990NH	0.438695	NA	NA	NA	NA	NA
A/Brazil/91	EPI239829	EPI_ISL_68839	South America / Brazil	Human	1991	329	unassigned	unassigned	2.52148	-5.08594	4.47266	c1	1990NH	1.6886	NA	NA	NA	NA	NA
A/Singapore/91	EPI239830	EPI_ISL_68840	Asia / Singapore	Human	1991	329	unassigned	unassigned	2.51367	-6.66797	4.76172	c1	1990NH	1.68659	NA	NA	NA	NA	NA
A/England/260/91	EPI23928	EPI_ISL_4283	Europe / United Kingdom	Human	1991	329	unassigned	unassigned	1.05273	-5.64453	5.25	c1	1990NH	0.317283	NA	NA	NA	NA	NA
A/Canberra/1/91	EPI23930	EPI_ISL_4284	Oceania / Australia / Australian Capital Territory	Human	1991	329	unassigned	unassigned	1.63672	-5.99219	5.27734	c1	1990NH	0.658616	NA	NA	NA	NA	NA
A/Netherlands/816/91	EPI23934	EPI_ISL_4286	Europe / Netherlands	Human	1991	329	unassigned	unassigned	0.833984	-5.40234	5.42969	c1	1990NH	0.653732	NA	NA	NA	NA	NA
A/Madrid/G12/91	EPI23936	EPI_ISL_4287	Europe / Spain	Human	1991	329	unassigned	unassigned	0.789551	-5.38281	5.38672	c1	1990NH	0.656069	NA	NA	NA	NA	NA
A/Geneva/6447/91	EPI23932	EPI_ISL_4285	Europe / Switzerland	Human	1991	329	unassigned	unassigned	0.658203	-5.71875	4.91406	c1	1990NH	0.435717	NA	NA	NA	NA	NA
A/Lyon/1149/91	EPI23974	EPI_ISL_4305	Europe / France	Human	1991	329	unassigned	unassigned	0.658203	-5.71875	4.91406	c1	1990NH	0.435717	NA	NA	NA	NA	NA
A/Lyon/1182/91	EPI23976	EPI_ISL_4306	Europe / France	Human	1991	329	unassigned	unassigned	0.658203	-5.71875	4.91406	c1	1990NH	0.435717	NA	NA	NA	NA	NA
A/Lyon/ons1189/91	EPI23978	EPI_ISL_4307	Europe / France	Human	1991	329	unassigned	unassigned	0.658203	-5.71875	4.91406	c1	1990NH	0.435717	NA	NA	NA	NA	NA
A/Lyon/ons1594/91	EPI23980	EPI_ISL_4308	Europe / France	Human	1991	329	unassigned	unassigned	0.712891	-5.70703	4.95312	c1	1990NH	0.381277	NA	NA	NA	NA	NA
A/Lyon/ons1373/91	EPI23982	EPI_ISL_4309	Europe / France	Human	1991	329	unassigned	unassigned	0.658203	-5.71875	4.91406	c1	1990NH	0.435717	NA	NA	NA	NA	NA
A/Lyon/ons1276/91	EPI23984	EPI_ISL_4310	Europe / France	Human	1991	329	unassigned	unassigned	0.658203	-5.71875	4.91406	c1	1990NH	0.435717	NA	NA	NA	NA	NA
A/Lyon/ons1337/91	EPI23986	EPI_ISL_4311	Europe / France	Human	1991	329	unassigned	unassigned	0.658203	-5.71875	4.91406	c1	1990NH	0.435717	NA	NA	NA	NA	NA
A/Lyon/chu23672/91	EPI23988	EPI_ISL_4312	Europe / France	Human	1991	329	unassigned	unassigned	0.658203	-5.71875	4.91406	c1	1990NH	0.435717	NA	NA	NA	NA	NA
A/Lyon/chu24103/91	EPI23990	EPI_ISL_4313	Europe / France	Human	1991	329	unassigned	unassigned	0.658203	-5.71875	4.91406	c1	1990NH	0.435717	NA	NA	NA	NA	NA
A/Lyon/chu24222/91	EPI23992	EPI_ISL_4314	Europe / France	Human	1991	329	unassigned	unassigned	0.658203	-5.71875	4.91406	c1	1990NH	0.435717	NA	NA	NA	NA	NA
A/Stockholm/20/91	EPI24016	EPI_ISL_4325	Europe / Sweden	Human	1991	329	unassigned	unassigned	0.742676	-5.63281	5.08594	c1	1990NH	0.394382	NA	NA	NA	NA	NA
A/Cuba/1991-1183/1991	EPI1766684	EPI_ISL_499237	North America / Cuba	Human	1991-10-07	329	unassigned	unassigned	3.22461	-5.38281	4.42578	c1	1991NH	1.96165	NA	NA	NA	NA	NA
A/Brazil/02/91	EPI78205	EPI_ISL_8152	South America / Brazil	Human	1991	329	unassigned	unassigned	1.24707	-6.02734	4.67969	c1	1990NH	0.407399	NA	NA	NA	NA	NA
A/Geneva/6447/1991	EPI362541	EPI_ISL_110910	Europe / Switzerland	Human	1991-11-27	329	unassigned	unassigned	0.658203	-5.71875	4.91406	c1	1991NH	0.673294	NA	NA	NA	NA	NA
A/Stockholm/20/1991	EPI362548	EPI_ISL_110951	Europe / Sweden	Human	1991-12-17	329	unassigned	unassigned	0.742676	-5.63281	5.08594	c1	1991NH	0.635823	NA	NA	NA	NA	NA
A/South Dakota/01/1991	EPI129152	EPI_ISL_14557	North America / United States / South Dakota	Human	1991	329	unassigned	unassigned	0.749512	-5.60547	5.09375	c1	1990NH	0.403648	NA	NA	NA	NA	NA
A/Hawaii/01/1991	EPI129146	EPI_ISL_14555	North America / United States / Hawaii	Human	1991	329	unassigned	unassigned	0.753906	-5.61328	5.19922	c1	1990NH	0.438695	NA	NA	NA	NA	NA
A/Canberra/1/1991	EPI365770	EPI_ISL_114458	Oceania / Australia	Human	1991	329	unassigned	unassigned	1.63672	-5.99219	5.27734	c1	1990NH	0.658616	NA	NA	NA	NA	NA
A/England/260/1991	EPI365778	EPI_ISL_114502	Europe / United Kingdom	Human	1991-09-15	329	unassigned	unassigned	1.05273	-5.64453	5.25	c1	1991NH	0.506653	NA	NA	NA	NA	NA
A/Lyon/1182/1991	EPI365802	EPI_ISL_114505	Europe / France	Human	1991-12-12	329	unassigned	unassigned	0.658203	-5.71875	4.91406	c1	1991NH	0.673294	NA	NA	NA	NA	NA
A/Geneva/5366/1991	EPI365786	EPI_ISL_114503	Europe / Switzerland	Human	1991	329	unassigned	unassigned	1.83887	-6.33594	5.10547	c1	1990NH	0.934085	NA	NA	NA	NA	NA
A/Lyon/1149/1991	EPI365794	EPI_ISL_114504	Europe / France	Human	1991-12-09	329	unassigned	unassigned	0.658203	-5.71875	4.91406	c1	1991NH	0.673294	NA	NA	NA	NA	NA
A/Lyon/1189/1991	EPI365810	EPI_ISL_114506	Europe / France	Human	1991-12-12	329	unassigned	unassigned	0.658203	-5.71875	4.91406	c1	1991NH	0.673294	NA	NA	NA	NA	NA
A/Lyon/1373/1991	EPI365834	EPI_ISL_114555	Europe / France	Human	1991-12-16	329	unassigned	unassigned	0.658203	-5.71875	4.91406	c1	1991NH	0.673294	NA	NA	NA	NA	NA
A/Lyon/1276/1991	EPI365818	EPI_ISL_114507	Europe / France	Human	1991-12-12	329	unassigned	unassigned	0.658203	-5.71875	4.91406	c1	1991NH	0.673294	NA	NA	NA	NA	NA
A/Lyon/1337/1991	EPI365826	EPI_ISL_114554	Europe / France	Human	1991-12-16	329	unassigned	unassigned	0.658203	-5.71875	4.91406	c1	1991NH	0.673294	NA	NA	NA	NA	NA
A/Lyon/24222/1991	EPI365866	EPI_ISL_114559	Europe / France	Human	1991-12-26	329	unassigned	unassigned	0.658203	-5.71875	4.91406	c1	1991NH	0.673294	NA	NA	NA	NA	NA
A/Lyon/1594/1991	EPI365842	EPI_ISL_114556	Europe / France	Human	1991-12-26	329	unassigned	unassigned	0.712891	-5.70703	4.95312	c1	1991NH	0.625375	NA	NA	NA	NA	NA
A/Lyon/24103/1991	EPI365858	EPI_ISL_114558	Europe / France	Human	1991-12-24	329	unassigned	unassigned	0.658203	-5.71875	4.91406	c1	1991NH	0.673294	NA	NA	NA	NA	NA
A/Lyon/23672/1991	EPI365850	EPI_ISL_114557	Europe / France	Human	1991-12-17	329	unassigned	unassigned	0.658203	-5.71875	4.91406	c1	1991NH	0.673294	NA	NA	NA	NA	NA
A/Netherlands/891/1991	EPI365890	EPI_ISL_114609	Europe / Netherlands	Human	1991-12-04	329	unassigned	unassigned	0.833984	-5.40234	5.42969	c1	1991NH	0.815001	NA	NA	NA	NA	NA
A/Madrid/G12/1991	EPI365874	EPI_ISL_114607	Europe / Spain / Madrid	Human	1991	329	unassigned	unassigned	0.789551	-5.38281	5.38672	c1	1990NH	0.656069	NA	NA	NA	NA	NA
A/Netherlands/816/1991	EPI365882	EPI_ISL_114608	Europe / Netherlands	Human	1991-12-19	329	unassigned	unassigned	0.833984	-5.40234	5.42969	c1	1991NH	0.815001	NA	NA	NA	NA	NA
A/Netherlands/938/1992	EPI365963	EPI_ISL_114660	Europe / Netherlands	Human	1991-12-19	329	unassigned	unassigned	3.875	-5.70312	4.30078	c1	1991NH	2.60794	NA	NA	NA	NA	NA
A/Oviedo/31/1992	EPI365995	EPI_ISL_114707	Europe / Spain	Human	1991-12-28	329	unassigned	unassigned	0.833984	-5.40234	5.42969	c1	1991NH	0.815001	NA	NA	NA	NA	NA
A/Paris/407/1992	EPI366019	EPI_ISL_114710	Europe / France	Human	1991-12-01	329	unassigned	unassigned	0.658203	-5.71875	4.91406	c1	1991NH	0.673294	NA	NA	NA	NA	NA
A/Paris/325/1992	EPI366011	EPI_ISL_114709	Europe / France	Human	1991-12-01	329	unassigned	unassigned	0.658203	-5.71875	4.91406	c1	1991NH	0.673294	NA	NA	NA	NA	NA
A/Paris/548/1992	EPI366076	EPI_ISL_114763	Europe / France	Human	1991-12-01	329	unassigned	unassigned	0.658203	-5.71875	4.91406	c1	1991NH	0.673294	NA	NA	NA	NA	NA
A/Paris/320/1992	EPI366003	EPI_ISL_114708	Europe / France	Human	1991-12-01	329	unassigned	unassigned	0.658203	-5.71875	4.91406	c1	1991NH	0.673294	NA	NA	NA	NA	NA
A/Paris/457/1992	EPI366052	EPI_ISL_114760	Europe / France	Human	1991-12-01	329	unassigned	unassigned	0.658203	-5.71875	4.91406	c1	1991NH	0.673294	NA	NA	NA	NA	NA
A/Paris/417/1992	EPI366036	EPI_ISL_114758	Europe / France	Human	1991-12-01	329	unassigned	unassigned	0.658203	-5.69922	4.92578	c1	1991NH	0.672999	NA	NA	NA	NA	NA
A/Paris/467/1992	EPI366061	EPI_ISL_114761	Europe / France	Human	1991-12-01	329	unassigned	unassigned	0.664062	-5.53906	5.16406	c1	1991NH	0.74754	NA	NA	NA	NA	NA
A/Paris/424/1992	EPI366044	EPI_ISL_114759	Europe / France	Human	1991-12-01	329	unassigned	unassigned	0.658203	-5.71875	4.91406	c1	1991NH	0.673294	NA	NA	NA	NA	NA
A/Paris/512/1991	EPI366068	EPI_ISL_114762	Europe / France	Human	1991-12-01	329	unassigned	unassigned	0.658203	-5.71875	4.91406	c1	1991NH	0.673294	NA	NA	NA	NA	NA
A/Paris/597/1991	EPI366100	EPI_ISL_114813	Europe / France	Human	1991-12-01	329	unassigned	unassigned	0.658203	-5.71875	4.91406	c1	1991NH	0.673294	NA	NA	NA	NA	NA
A/Paris/564/1991	EPI366084	EPI_ISL_114811	Europe / France	Human	1991-12-01	329	unassigned	unassigned	0.658203	-5.71875	4.91406	c1	1991NH	0.673294	NA	NA	NA	NA	NA
A/Tilburg/5957/1992	EPI366155	EPI_ISL_114870	Europe / Netherlands	Human	1991-12-04	329	unassigned	unassigned	0.833984	-5.40234	5.42969	c1	1991NH	0.815001	NA	NA	NA	NA	NA
A/United Kingdom/261/1991	EPI367198	EPI_ISL_115770	Europe / United Kingdom	Human	1991	329	unassigned	unassigned	0.508301	-5.38281	5.15625	c1	1990NH	0.733407	NA	NA	NA	NA	NA
A/Siena/6/1991	EPI165689	EPI_ISL_25044	Europe / Italy / Tuscany / Province of Siena	Human	1991-12-24	329	unassigned	unassigned	1.86328	-5.03516	4.8125	c1	1991NH	0.812012	NA	NA	NA	NA	NA
A/Canberra/1/1991	EPI2120290	EPI_ISL_14284809	Oceania / Australia / Australian Capital Territory / Canberra	Human	1991	329	unassigned	unassigned	1.66406	-5.99219	5.3125	c1	1990NH	0.698011	NA	NA	NA	NA	NA
A/Chiba/54/92	EPI305	EPI_ISL_122	Asia / Japan	Human	1992	329	unassigned	unassigned	0.658203	-5.71875	4.91406	c1	1991NH	0.673294	NA	NA	NA	NA	NA
A/South_Australia/36/92	EPI3691	EPI_ISL_717	Oceania / Australia / South Australia	Human	1992	329	unassigned	unassigned	0.658203	-5.71875	4.91406	c1	1991NH	0.673294	NA	NA	NA	NA	NA
A/Kasauli/149/92	EPI3713	EPI_ISL_728	Asia / India / Himachal Pradesh / Kasauli	Human	1992	329	unassigned	unassigned	0.947754	-5.70703	5.21094	c1	1991NH	0.544411	NA	NA	NA	NA	NA
A/South_Australia/68/92	EPI3723	EPI_ISL_733	Oceania / Australia / South Australia	Human	1992	329	unassigned	unassigned	1.19434	-5.66016	5.23047	c1	1991NH	0.43018	NA	NA	NA	NA	NA
A/Victoria/68/92	EPI3725	EPI_ISL_734	Oceania / Australia / Victoria	Human	1992	329	unassigned	unassigned	1.20508	-5.71875	5.22656	c1	1991NH	0.430387	NA	NA	NA	NA	NA
A/Beijing/47/92	EPI3727	EPI_ISL_735	Asia / China	Human	1992	329	unassigned	unassigned	1.65723	-6.00391	4.79688	c1	1991NH	0.497665	NA	NA	NA	NA	NA
A/Wellington/66/92	EPI3729	EPI_ISL_736	Oceania / New Zealand	Human	1992	329	unassigned	unassigned	1.56543	-5.74219	5.02344	c1	1991NH	0.335412	NA	NA	NA	NA	NA
A/Victoria/29/92	EPI3731	EPI_ISL_737	Oceania / Australia / Victoria	Human	1992	329	unassigned	unassigned	1.66406	-5.92969	5.1875	c1	1991NH	0.58175	NA	NA	NA	NA	NA
A/Harbin/15/92	EPI3949	EPI_ISL_843	Asia / China	Human	1992	329	unassigned	unassigned	3.97852	-5.52344	3.25977	c1	1991NH	3.08449	NA	NA	NA	NA	NA
A/Alaska/9/92	EPI3959	EPI_ISL_848	North America / United States / Alaska	Human	1992	329	unassigned	unassigned	3.49609	-5.47656	4.02344	c1	1991NH	2.32283	NA	NA	NA	NA	NA
A/Hawaii/3/92	EPI3961	EPI_ISL_849	North America / United States / Hawaii	Human	1992	329	unassigned	unassigned	3.57422	-5.45312	4.26953	c1	1991NH	2.32776	NA	NA	NA	NA	NA
A/Qingdao/53/92	EPI3963	EPI_ISL_850	Asia / China / Shandong Province / Qingdao	Human	1992	329	unassigned	unassigned	3.26953	-5.40234	4.30078	c1	1991NH	2.03117	NA	NA	NA	NA	NA
A/California/271/92	EPI3965	EPI_ISL_851	North America / United States / California	Human	1992	329	unassigned	unassigned	3.49609	-5.37109	4.36328	c1	1991NH	2.23946	NA	NA	NA	NA	NA
A/Yokohama/73/92	EPI78211	EPI_ISL_1295	Asia / Japan	Human	1992	329	unassigned	unassigned	3.96289	-5.52734	3.28906	c1	1991NH	3.05611	NA	NA	NA	NA	NA
A/Netherlands/823/92	EPI23994	EPI_ISL_1655	Europe / Netherlands	Human	1992	329	unassigned	unassigned	0.658203	-5.71875	4.91406	c1	1991NH	0.673294	NA	NA	NA	NA	NA
A/Sapporro/92	EPI239764	EPI_ISL_68824	Asia / Japan	Human	1992	329	unassigned	unassigned	3.88867	-5.53516	3.24609	c1	1991NH	3.01409	NA	NA	NA	NA	NA
A/Netherlands/823/1992	EPI545281	EPI_ISL_167243	Europe / Netherlands	Human	1992	329	unassigned	unassigned	0.658203	-5.71875	4.91406	c1	1991NH	0.673294	NA	NA	NA	NA	NA
A/Beijing/32/1992	EPI545289	EPI_ISL_167251	Asia / China	Human	1992	329	unassigned	unassigned	3.58008	-5.47266	4.28906	c1	1991NH	2.32744	NA	NA	NA	NA	NA
A/Finland/247/92	EPI24054	EPI_ISL_3651	Europe / Finland	Human	1992	329	unassigned	unassigned	3.75	-5.48828	3.35547	c1	1991NH	2.84099	NA	NA	NA	NA	NA
A/Netherlands/819/92	EPI23938	EPI_ISL_4288	Europe / Netherlands	Human	1992	329	unassigned	unassigned	1.07715	-5.64844	5.28516	c1	1991NH	0.525168	NA	NA	NA	NA	NA
A/Paris/325/92	EPI23944	EPI_ISL_4290	Europe / France	Human	1992	329	unassigned	unassigned	0.658203	-5.71875	4.91406	c1	1991NH	0.673294	NA	NA	NA	NA	NA
A/Paris/320/92	EPI23942	EPI_ISL_4289	Europe / France	Human	1992	329	unassigned	unassigned	0.658203	-5.71875	4.91406	c1	1991NH	0.673294	NA	NA	NA	NA	NA
A/Paris/407/92	EPI23946	EPI_ISL_4291	Europe / France	Human	1992	329	unassigned	unassigned	0.658203	-5.71875	4.91406	c1	1991NH	0.673294	NA	NA	NA	NA	NA
A/Paris/417/92	EPI23948	EPI_ISL_4292	Europe / France	Human	1992	329	unassigned	unassigned	0.658203	-5.69922	4.92578	c1	1991NH	0.672999	NA	NA	NA	NA	NA
A/Paris/424/92	EPI23950	EPI_ISL_4293	Europe / France	Human	1992	329	unassigned	unassigned	0.658203	-5.71875	4.91406	c1	1991NH	0.673294	NA	NA	NA	NA	NA
A/Paris/457/92	EPI23952	EPI_ISL_4294	Europe / France	Human	1992	329	unassigned	unassigned	0.658203	-5.71875	4.91406	c1	1991NH	0.673294	NA	NA	NA	NA	NA
A/Paris/467/92	EPI23954	EPI_ISL_4295	Europe / France	Human	1992	329	unassigned	unassigned	0.664062	-5.53906	5.16406	c1	1991NH	0.74754	NA	NA	NA	NA	NA
A/Paris/512/92	EPI23958	EPI_ISL_4297	Europe / France	Human	1992	329	unassigned	unassigned	0.658203	-5.71875	4.91406	c1	1991NH	0.673294	NA	NA	NA	NA	NA
A/Paris/548/92	EPI23960	EPI_ISL_4298	Europe / France	Human	1992	329	unassigned	unassigned	0.658203	-5.71875	4.91406	c1	1991NH	0.673294	NA	NA	NA	NA	NA
A/Paris/564/92	EPI23962	EPI_ISL_4299	Europe / France	Human	1992	329	unassigned	unassigned	0.658203	-5.71875	4.91406	c1	1991NH	0.673294	NA	NA	NA	NA	NA
A/Paris/583/92	EPI23964	EPI_ISL_4300	Europe / France	Human	1992	329	unassigned	unassigned	0.681152	-5.50391	5.20312	c1	1991NH	0.757205	NA	NA	NA	NA	NA
A/Paris/597/92	EPI23966	EPI_ISL_4301	Europe / France	Human	1992	329	unassigned	unassigned	0.658203	-5.71875	4.91406	c1	1991NH	0.673294	NA	NA	NA	NA	NA
A/Paris/614/92	EPI23968	EPI_ISL_4302	Europe / France	Human	1992	329	unassigned	unassigned	1.22949	-5.8125	5.20312	c1	1991NH	0.430703	NA	NA	NA	NA	NA
A/Finland/218/92	EPI23996	EPI_ISL_4315	Europe / Finland	Human	1992	329	unassigned	unassigned	0.658203	-5.71875	4.91406	c1	1991NH	0.673294	NA	NA	NA	NA	NA
A/Finland/220/92	EPI23998	EPI_ISL_4316	Europe / Finland	Human	1992	329	unassigned	unassigned	0.742676	-5.63281	5.08594	c1	1991NH	0.635823	NA	NA	NA	NA	NA
A/Geneva/5113/92	EPI24000	EPI_ISL_4317	Europe / Switzerland	Human	1992	329	unassigned	unassigned	0.658203	-5.71875	4.91406	c1	1991NH	0.673294	NA	NA	NA	NA	NA
A/Rotterdam/100540/92	EPI24002	EPI_ISL_4318	Europe / Netherlands	Human	1992	329	unassigned	unassigned	0.680176	-5.75781	4.91406	c1	1991NH	0.657656	NA	NA	NA	NA	NA
A/Nijmegen/3129/92	EPI24006	EPI_ISL_4320	Europe / Netherlands	Human	1992	329	unassigned	unassigned	0.833984	-5.40234	5.42969	c1	1991NH	0.815001	NA	NA	NA	NA	NA
A/Amsterdam/4112/92	EPI24008	EPI_ISL_4321	Europe / Netherlands	Human	1992	329	unassigned	unassigned	0.833984	-5.40234	5.42969	c1	1991NH	0.815001	NA	NA	NA	NA	NA
A/Tilburg/5957/92	EPI24010	EPI_ISL_4322	Europe / Netherlands / North Brabant / Tilburg	Human	1992	329	unassigned	unassigned	0.833984	-5.40234	5.42969	c1	1991NH	0.815001	NA	NA	NA	NA	NA
A/Madrid/G58/92	EPI24012	EPI_ISL_4323	Europe / Spain	Human	1992	329	unassigned	unassigned	1.09082	-5.71875	5.07031	c1	1991NH	0.348991	NA	NA	NA	NA	NA
A/Madrid/OV31/92	EPI24014	EPI_ISL_4324	Europe / Spain	Human	1992	329	unassigned	unassigned	0.833984	-5.40234	5.42969	c1	1991NH	0.815001	NA	NA	NA	NA	NA
A/Stockholm/7/92	EPI24018	EPI_ISL_4326	Europe / Sweden	Human	1992	329	unassigned	unassigned	1.19434	-5.66016	5.23047	c1	1991NH	0.43018	NA	NA	NA	NA	NA
A/Stockholm/8/92	EPI24020	EPI_ISL_4327	Europe / Sweden	Human	1992	329	unassigned	unassigned	0.658203	-5.71875	4.91406	c1	1991NH	0.673294	NA	NA	NA	NA	NA
A/Houston/56829/92	EPI24022	EPI_ISL_4328	North America / United States / Texas	Human	1992	329	unassigned	unassigned	0.662598	-5.76172	4.87109	c1	1991NH	0.670813	NA	NA	NA	NA	NA
A/Nijmegen/3126/92	EPI24004	EPI_ISL_4319	Europe / Netherlands	Human	1992	329	unassigned	unassigned	0.658203	-5.71875	4.91406	c1	1991NH	0.673294	NA	NA	NA	NA	NA
A/Houston/56941/92	EPI24024	EPI_ISL_4329	North America / United States / Texas	Human	1992	329	unassigned	unassigned	0.658203	-5.71875	4.91406	c1	1991NH	0.673294	NA	NA	NA	NA	NA
A/Houston/56798/92	EPI24026	EPI_ISL_4330	North America / United States / Texas	Human	1992	329	unassigned	unassigned	0.648438	-5.67578	4.92969	c1	1991NH	0.681543	NA	NA	NA	NA	NA
A/South_Australia/8/92	EPI24030	EPI_ISL_4332	Oceania / Australia / South Australia	Human	1992	329	unassigned	unassigned	0.658203	-5.71875	4.91406	c1	1991NH	0.673294	NA	NA	NA	NA	NA
A/South_Australia/23/92	EPI24032	EPI_ISL_4333	Oceania / Australia / South Australia	Human	1992	329	unassigned	unassigned	0.658203	-5.71875	4.91406	c1	1991NH	0.673294	NA	NA	NA	NA	NA
A/South_Australia/27/92	EPI24034	EPI_ISL_4334	Oceania / Australia / South Australia	Human	1992	329	unassigned	unassigned	0.658203	-5.71875	4.91406	c1	1991NH	0.673294	NA	NA	NA	NA	NA
A/Sendai/C273/92	EPI24036	EPI_ISL_4335	Asia / Japan	Human	1992	329	unassigned	unassigned	3.88867	-5.53516	3.24609	c1	1991NH	3.01409	NA	NA	NA	NA	NA
A/Umea/1982/92	EPI24046	EPI_ISL_4339	Europe / Sweden / Vasterbottens Lan / Umea	Human	1992	329	unassigned	unassigned	1.52637	-5.94922	5.09375	c1	1991NH	0.462824	NA	NA	NA	NA	NA
A/Stockholm/12/92	EPI24050	EPI_ISL_4341	Europe / Sweden	Human	1992	329	unassigned	unassigned	3.75	-5.48828	3.35547	c1	1991NH	2.84099	NA	NA	NA	NA	NA
A/Stockholm/13/92	EPI24052	EPI_ISL_4342	Europe / Sweden	Human	1992	329	unassigned	unassigned	1.52637	-5.94922	5.09375	c1	1991NH	0.462824	NA	NA	NA	NA	NA
A/Cuba/1992-1056/1992	EPI1766685	EPI_ISL_499238	North America / Cuba	Human	1992-10-17	329	unassigned	unassigned	1.07715	-6.05469	4.74219	c1	1992NH	2.59942	NA	NA	NA	NA	NA
A/Tianjin/33/92	EPI78209	EPI_ISL_8153	Asia / China	Human	1992	329	unassigned	unassigned	3.74219	-5.53516	4.14453	c1	1991NH	2.51663	NA	NA	NA	NA	NA
A/Hong Kong/14/1992	EPI84825	EPI_ISL_8696	Asia / Hong Kong (SAR)	Human	1992	329	unassigned	unassigned	2.41602	-4.86719	4.92578	c1	1991NH	1.34447	NA	NA	NA	NA	NA
A/Netherlands/823/1992	EPI1868434	EPI_ISL_2402551	Europe / Netherlands	Human	1992-01-01	329	unassigned	unassigned	0.658203	-5.71875	4.91406	c1	1991NH	0.673294	NA	NA	NA	NA	NA
A/Enschede/1285/1992	EPI362561	EPI_ISL_110953	Europe / Netherlands	Human	1992-01-09	329	unassigned	unassigned	1.13281	-5.70312	5.07422	c1	1991NH	0.322528	NA	NA	NA	NA	NA
A/Amsterdam/4112/1992	EPI362555	EPI_ISL_110952	Europe / Netherlands	Human	1992	329	unassigned	unassigned	0.833984	-5.40234	5.42969	c1	1991NH	0.815001	NA	NA	NA	NA	NA
A/Finland/220/1992	EPI362574	EPI_ISL_110955	Europe / Finland	Human	1992-01-24	329	unassigned	unassigned	0.742676	-5.63281	5.08594	c1	1991NH	0.635823	NA	NA	NA	NA	NA
A/Finland/218/1992	EPI362567	EPI_ISL_110954	Europe / Finland	Human	1992-01-24	329	unassigned	unassigned	0.658203	-5.71875	4.91406	c1	1991NH	0.673294	NA	NA	NA	NA	NA
A/Finland/247/1992	EPI362581	EPI_ISL_110956	Europe / Finland	Human	1992	329	unassigned	unassigned	3.86328	-5.64453	3.2168	c1	1991NH	3.00621	NA	NA	NA	NA	NA
A/Sendai/C273/1992	EPI362601	EPI_ISL_110995	Asia / Japan	Human	1992	329	unassigned	unassigned	3.88867	-5.53516	3.24609	c1	1991NH	3.01409	NA	NA	NA	NA	NA
A/Rotterdam/100540/1992	EPI362595	EPI_ISL_110994	Europe / Netherlands	Human	1992-01-26	329	unassigned	unassigned	0.680176	-5.75781	4.91406	c1	1991NH	0.657656	NA	NA	NA	NA	NA
A/Stockholm/8/1992	EPI362615	EPI_ISL_110997	Europe / Sweden	Human	1992-03-02	329	unassigned	unassigned	0.658203	-5.71875	4.91406	c1	1992SH	0.19495	NA	NA	NA	NA	NA
A/Victoria/33/1992	EPI362622	EPI_ISL_110998	Oceania / Australia / Victoria	Human	1992-06-29	329	unassigned	unassigned	1.19434	-5.66016	5.23047	c1	1992SH	0.435238	NA	NA	NA	NA	NA
A/South Australia/8/1992	EPI362608	EPI_ISL_110996	Oceania / Australia	Human	1992-03-05	329	unassigned	unassigned	0.658203	-5.71875	4.91406	c1	1992SH	0.19495	NA	NA	NA	NA	NA
A/Netherlands/3/1993	EPI362652	EPI_ISL_111022	Europe / Netherlands	Human	1992-11-22	329	unassigned	unassigned	3.44141	-5.41797	4.22266	c1	1992NH	0.627784	NA	NA	NA	NA	NA
A/Beijing/32/1992	EPI365898	EPI_ISL_114610	Asia / China	Human	1992	329	unassigned	unassigned	3.58008	-5.47266	4.28906	c1	1991NH	2.32744	NA	NA	NA	NA	NA
A/Geneva/5113/1992	EPI365906	EPI_ISL_114611	Europe / Switzerland	Human	1992-01-15	329	unassigned	unassigned	0.658203	-5.71875	4.91406	c1	1991NH	0.673294	NA	NA	NA	NA	NA
A/Houston/56798/1992	EPI365914	EPI_ISL_114612	North America / United States	Human	1992-04-03	329	unassigned	unassigned	0.648438	-5.67578	4.92969	c1	1992SH	0.189257	NA	NA	NA	NA	NA
A/Houston/56829/1992	EPI365922	EPI_ISL_114655	North America / United States	Human	1992-04-03	329	unassigned	unassigned	0.662598	-5.76172	4.87109	c1	1992SH	0.232882	NA	NA	NA	NA	NA
A/Houston/56941/1992	EPI365930	EPI_ISL_114656	North America / United States	Human	1992-04-03	329	unassigned	unassigned	0.658203	-5.71875	4.91406	c1	1992SH	0.19495	NA	NA	NA	NA	NA
A/Madrid/G58/1992	EPI365938	EPI_ISL_114657	Europe / Spain / Madrid	Human	1992-01-14	329	unassigned	unassigned	0.833984	-5.40234	5.42969	c1	1991NH	0.815001	NA	NA	NA	NA	NA
A/Netherlands/935/1992	EPI365956	EPI_ISL_114659	Europe / Netherlands	Human	1992-01-10	329	unassigned	unassigned	1.11035	-5.69531	5.05859	c1	1991NH	0.322922	NA	NA	NA	NA	NA
A/Netherlands/819/1992	EPI365946	EPI_ISL_114658	Europe / Netherlands	Human	1992-01-09	329	unassigned	unassigned	1.07715	-5.64844	5.28516	c1	1991NH	0.525168	NA	NA	NA	NA	NA
A/Netherlands/823/1992	EPI365966	EPI_ISL_114661	Europe / Netherlands	Human	1992-02-03	329	unassigned	unassigned	0.658203	-5.71875	4.91406	c1	1992SH	0.19495	NA	NA	NA	NA	NA
A/Nijmegen/3126/1992	EPI365979	EPI_ISL_114705	Europe / Netherlands	Human	1992-01-09	329	unassigned	unassigned	0.658203	-5.71875	4.91406	c1	1991NH	0.673294	NA	NA	NA	NA	NA
A/Nijmegen/3129/1992	EPI365987	EPI_ISL_114706	Europe / Netherlands	Human	1992-02-07	329	unassigned	unassigned	0.833984	-5.40234	5.42969	c1	1992SH	0.482994	NA	NA	NA	NA	NA
A/Paris/614/1992	EPI366108	EPI_ISL_114814	Europe / France	Human	1992-01-01	329	unassigned	unassigned	1.22949	-5.8125	5.20312	c1	1991NH	0.430703	NA	NA	NA	NA	NA
A/Paris/583/1992	EPI366092	EPI_ISL_114812	Europe / France	Human	1992-01-01	329	unassigned	unassigned	0.681152	-5.50391	5.20312	c1	1991NH	0.757205	NA	NA	NA	NA	NA
A/South Austalia/27/1992	EPI366130	EPI_ISL_114816	Oceania / Australia	Human	1992-04-06	329	unassigned	unassigned	0.658203	-5.71875	4.91406	c1	1992SH	0.19495	NA	NA	NA	NA	NA
A/South Austalia/23/1992	EPI366115	EPI_ISL_114815	Oceania / Australia	Human	1992-03-31	329	unassigned	unassigned	0.658203	-5.71875	4.91406	c1	1992SH	0.19495	NA	NA	NA	NA	NA
A/Stockholm/7/1992	EPI366140	EPI_ISL_114867	Europe / Sweden	Human	1992-02-14	329	unassigned	unassigned	1.19434	-5.66016	5.23047	c1	1992SH	0.435238	NA	NA	NA	NA	NA
A/Stockholm/13/1992	EPI366148	EPI_ISL_114869	Europe / Sweden	Human	1992-12-01	329	unassigned	unassigned	1.52637	-5.94922	5.09375	c1	1992NH	2.39478	NA	NA	NA	NA	NA
A/Stockholm/12/1992	EPI366139	EPI_ISL_114868	Europe / Sweden	Human	1992-11-01	329	unassigned	unassigned	3.75	-5.48828	3.35547	c1	1992NH	0.476482	NA	NA	NA	NA	NA
A/Umea/1982/1992	EPI366163	EPI_ISL_114871	Europe / Sweden	Human	1992-10-01	329	unassigned	unassigned	1.52637	-5.94922	5.09375	c1	1992NH	2.39478	NA	NA	NA	NA	NA
A/Victoria/68/1992	EPI366179	EPI_ISL_114873	Oceania / Australia / Victoria	Human	1992-07-17	329	unassigned	unassigned	1.19434	-5.66016	5.23047	c1	1992SH	0.435238	NA	NA	NA	NA	NA
A/Umea/2000/1992	EPI366171	EPI_ISL_114872	Europe / Sweden	Human	1992-11-01	329	unassigned	unassigned	1.48145	-5.9375	5.09375	c1	1992NH	2.42685	NA	NA	NA	NA	NA
A/Netherlands/823/1992	EPI297852	EPI_ISL_84908	Europe / Netherlands	Human	1992	329	unassigned	unassigned	0.658203	-5.71875	4.91406	c1	1991NH	0.673294	NA	NA	NA	NA	NA
A/Harbin/15/1992	EPI390010	EPI_ISL_127588	Asia / China	Human	1992	329	unassigned	unassigned	3.84375	-5.48438	3.36328	c1	1991NH	2.91787	NA	NA	NA	NA	NA
A/Aichi/4/93	EPI307	EPI_ISL_123	Asia / Japan	Human	1993	329	unassigned	unassigned	3.72852	-5.46484	3.41602	c1	1992NH	0.428739	NA	NA	NA	NA	NA
A/Sophia/155/93	EPI3685	EPI_ISL_714	North America / United States	Human	1993	329	unassigned	unassigned	1.42578	-6.08594	4.53906	c1	1992NH	2.21668	NA	NA	NA	NA	NA
A/India/237/93	EPI3711	EPI_ISL_727	Asia / India	Human	1993	329	unassigned	unassigned	2.33594	-4.91797	4.875	c1	1992NH	1.7175	NA	NA	NA	NA	NA
A/India/236/93	EPI3709	EPI_ISL_726	Asia / India	Human	1993	329	unassigned	unassigned	2.27539	-4.83594	4.94531	c1	1992NH	1.83271	NA	NA	NA	NA	NA
A/Spain/118/93	EPI3733	EPI_ISL_738	Europe / Spain	Human	1993	329	unassigned	unassigned	1.2168	-5.39062	5.39062	c1	1992NH	2.77882	NA	NA	NA	NA	NA
A/New_York/63/93	EPI3925	EPI_ISL_831	North America / United States / New York	Human	1993	329	unassigned	unassigned	3.6582	-5.57031	3.24414	c1	1992NH	0.486267	NA	NA	NA	NA	NA
A/New_York/64/93	EPI3927	EPI_ISL_832	North America / United States / New York	Human	1993	329	unassigned	unassigned	3.6582	-5.57031	3.24414	c1	1992NH	0.486267	NA	NA	NA	NA	NA
A/Russia/58/93	EPI3939	EPI_ISL_838	Europe / Russian Federation	Human	1993	329	unassigned	unassigned	4.17969	-5.53125	3.18359	c1	1992NH	0.936867	NA	NA	NA	NA	NA
A/Sichuan/4/93	EPI3943	EPI_ISL_840	Asia / China / Sichuan Province	Human	1993	329	unassigned	unassigned	3.94727	-5.60156	3.29688	c1	1992NH	0.687127	NA	NA	NA	NA	NA
A/Ningxia/10/93	EPI3945	EPI_ISL_841	Asia / China / Ningxia Hui Autonomous Region	Human	1993	329	unassigned	unassigned	3.87891	-5.58594	3.3418	c1	1992NH	0.604394	NA	NA	NA	NA	NA
A/New_York/13/93	EPI3973	EPI_ISL_855	North America / United States / New York	Human	1993	329	unassigned	unassigned	3.75	-5.48828	3.35547	c1	1992NH	0.476482	NA	NA	NA	NA	NA
A/Nanchang/3396/93	EPI3975	EPI_ISL_856	Asia / China	Human	1993	329	unassigned	unassigned	3.72266	-5.44141	3.4375	c1	1992NH	0.416124	NA	NA	NA	NA	NA
A/Argentina/3105/93	EPI3985	EPI_ISL_861	South America / Argentina	Human	1993	329	unassigned	unassigned	3.71875	-5.48828	3.42773	c1	1992NH	0.414356	NA	NA	NA	NA	NA
A/California/5/93	EPI3997	EPI_ISL_867	North America / United States / California	Human	1993	329	unassigned	unassigned	3.77734	-5.375	3.23633	c1	1992NH	0.579657	NA	NA	NA	NA	NA
A/Netherlands/372/93	EPI24104	EPI_ISL_868	Europe / Netherlands	Human	1993	329	unassigned	unassigned	3.65625	-5.33984	3.37109	c1	1992NH	0.416413	NA	NA	NA	NA	NA
A/Christ_Church/8/93	EPI4005	EPI_ISL_871	North America / Barbados / Christ Church	Human	1993	329	unassigned	unassigned	3.75586	-5.39062	3.2832	c1	1992NH	0.531234	NA	NA	NA	NA	NA
A/New_York/26/93	EPI4009	EPI_ISL_873	North America / United States / New York	Human	1993	329	unassigned	unassigned	3.63477	-5.35938	3.36914	c1	1992NH	0.39509	NA	NA	NA	NA	NA
A/Ann_Arbor/3/93	EPI4003	EPI_ISL_870	North America / United States / Michigan / Washtenaw County / Ann Arbor	Human	1993	329	unassigned	unassigned	3.73438	-5.35938	3.30078	c1	1992NH	0.510744	NA	NA	NA	NA	NA
A/Alaska/18/93	EPI4007	EPI_ISL_872	North America / United States / Alaska	Human	1993	329	unassigned	unassigned	3.48047	-5.33984	3.33789	c1	1992NH	0.333889	NA	NA	NA	NA	NA
A/Spain/125/93	EPI4015	EPI_ISL_876	Europe / Spain	Human	1993	329	unassigned	unassigned	3.52734	-5.34766	3.33984	c1	1992NH	0.350927	NA	NA	NA	NA	NA
A/England/220/93	EPI4011	EPI_ISL_874	Europe / United Kingdom	Human	1993	329	unassigned	unassigned	3.50977	-5.32031	3.37305	c1	1992NH	0.329758	NA	NA	NA	NA	NA
A/Georgia/3/93	EPI4013	EPI_ISL_875	North America / United States / Georgia	Human	1993	329	unassigned	unassigned	3.63477	-5.35938	3.36914	c1	1992NH	0.39509	NA	NA	NA	NA	NA
A/Spain/190/93	EPI4017	EPI_ISL_877	Europe / Spain	Human	1993	329	unassigned	unassigned	3.13477	-5.60156	3.49023	c1	1992NH	0.266472	NA	NA	NA	NA	NA
A/Texas/57/93	EPI4023	EPI_ISL_880	North America / United States / Texas	Human	1993	329	unassigned	unassigned	3.57617	-5.34375	3.41211	c1	1992NH	0.33348	NA	NA	NA	NA	NA
A/Stockholm/1/93	EPI4019	EPI_ISL_878	Europe / Sweden	Human	1993	329	unassigned	unassigned	3.57031	-5.33203	3.35742	c1	1992NH	0.369034	NA	NA	NA	NA	NA
A/New_York/3/93	EPI4021	EPI_ISL_879	North America / United States / New York	Human	1993	329	unassigned	unassigned	3.63477	-5.35938	3.36914	c1	1992NH	0.39509	NA	NA	NA	NA	NA
A/New_York/38/93	EPI4025	EPI_ISL_881	North America / United States / New York	Human	1993	329	unassigned	unassigned	3.79688	-5.46484	3.20703	c1	1992NH	0.603369	NA	NA	NA	NA	NA
A/Waikato/20/93	EPI4039	EPI_ISL_888	Oceania / New Zealand / Waikato	Human	1993	329	unassigned	unassigned	3.7207	-5.39844	3.15039	c1	1992NH	0.597083	NA	NA	NA	NA	NA
A/Wyoming/1/93	EPI4033	EPI_ISL_885	North America / United States / Wyoming	Human	1993	329	unassigned	unassigned	3.54102	-5.35938	3.31641	c1	1992NH	0.371844	NA	NA	NA	NA	NA
A/Washington/41/93	EPI4035	EPI_ISL_886	North America / United States / Washington	Human	1993	329	unassigned	unassigned	3.80859	-5.4375	3.16602	c1	1992NH	0.641146	NA	NA	NA	NA	NA
A/Kitakyushu/159/93	EPI78217	EPI_ISL_957	Asia / Japan / Fukuoka / Kitakyushu	Human	1993	329	unassigned	unassigned	3.68164	-5.54297	4.125	c1	1992NH	0.621425	NA	NA	NA	NA	NA
A/Hebei/12/93	EPI78215	EPI_ISL_1294	Asia / China	Human	1993	329	unassigned	unassigned	3.49219	-5.33203	3.89062	c1	1992NH	0.355294	NA	NA	NA	NA	NA
A/Netherlands/398/93	EPI24110	EPI_ISL_1559	Europe / Netherlands	Human	1993	329	unassigned	unassigned	3.84375	-5.39062	3.24414	c1	1992NH	0.623659	NA	NA	NA	NA	NA
A/Netherlands/115/93	EPI24058	EPI_ISL_1661	Europe / Netherlands	Human	1993	329	unassigned	unassigned	3.93945	-5.45312	3.26172	c1	1992NH	0.687956	NA	NA	NA	NA	NA
A/Netherlands/101/93	EPI24056	EPI_ISL_1671	Europe / Netherlands	Human	1993	329	unassigned	unassigned	3.74414	-5.48828	3.36133	c1	1992NH	0.468421	NA	NA	NA	NA	NA
A/Netherlands/126/93	EPI24060	EPI_ISL_1672	Europe / Netherlands	Human	1993	329	unassigned	unassigned	3.93945	-5.45312	3.26172	c1	1992NH	0.687956	NA	NA	NA	NA	NA
A/Netherlands/165/93	EPI24070	EPI_ISL_1673	Europe / Netherlands	Human	1993	329	unassigned	unassigned	1.2002	-5.66016	5.21875	c1	1992NH	2.68895	NA	NA	NA	NA	NA
A/Kitakyushu/93	EPI239721	EPI_ISL_68809	Asia / Japan	Human	1993	329	unassigned	unassigned	3.68164	-5.54297	4.125	c1	1992NH	0.621425	NA	NA	NA	NA	NA
A/North_Carolina/93	EPI239722	EPI_ISL_68810	North America / United States / North Carolina	Human	1993	329	unassigned	unassigned	3.41797	-5.29688	3.22656	c1	1992NH	0.429958	NA	NA	NA	NA	NA
A/Victoria/1/1993	EPI545285	EPI_ISL_167247	Oceania / Australia	Human	1993	329	unassigned	unassigned	3.74414	-5.39844	3.4668	c1	1992NH	0.431813	NA	NA	NA	NA	NA
A/Netherlands/179/1993	EPI545282	EPI_ISL_167244	Europe / Netherlands	Human	1993	329	unassigned	unassigned	3.52734	-5.34766	3.33984	c1	1992NH	0.350927	NA	NA	NA	NA	NA
A/Wellington/25/1993	EPI545286	EPI_ISL_167248	Oceania / New Zealand	Human	1993	329	unassigned	unassigned	3.63477	-5.35938	3.36914	c1	1992NH	0.39509	NA	NA	NA	NA	NA
A/Wellington/96/1993	EPI545287	EPI_ISL_167249	Oceania / New Zealand	Human	1993	329	unassigned	unassigned	3.22461	-5.26953	3.53711	c1	1992NH	0.256391	NA	NA	NA	NA	NA
A/Shangdong/9/1993	EPI545291	EPI_ISL_167253	Asia / China	Human	1993	329	unassigned	unassigned	3.70898	-5.41016	3.10156	c1	1992NH	0.62675	NA	NA	NA	NA	NA
A/Netherlands/3/93	EPI24040	EPI_ISL_4336	Europe / Netherlands	Human	1993	329	unassigned	unassigned	3.33594	-5.29688	4.18359	c1	1992NH	0.607591	NA	NA	NA	NA	NA
A/Netherlands/17/93	EPI24044	EPI_ISL_4338	Europe / Netherlands	Human	1993	329	unassigned	unassigned	3.35742	-5.30469	4.16797	c1	1992NH	0.590392	NA	NA	NA	NA	NA
A/Madrid/G116/93	EPI24062	EPI_ISL_4343	Europe / Spain	Human	1993	329	unassigned	unassigned	1.21582	-5.69141	5.21875	c1	1992NH	2.67873	NA	NA	NA	NA	NA
A/Madrid/G101/93	EPI24064	EPI_ISL_4344	Europe / Spain	Human	1993	329	unassigned	unassigned	1.21582	-5.69141	5.21875	c1	1992NH	2.67873	NA	NA	NA	NA	NA
A/Madrid/G102/93	EPI24066	EPI_ISL_4345	Europe / Spain	Human	1993	329	unassigned	unassigned	3.74414	-5.48828	3.36133	c1	1992NH	0.468421	NA	NA	NA	NA	NA
A/Madrid/G109/93	EPI24068	EPI_ISL_4346	Europe / Spain	Human	1993	329	unassigned	unassigned	3.60547	-5.3125	3.40039	c1	1992NH	0.374345	NA	NA	NA	NA	NA
A/Madrid/G122/93	EPI24072	EPI_ISL_4347	Europe / Spain	Human	1993	329	unassigned	unassigned	3.52734	-5.34766	3.33984	c1	1992NH	0.350927	NA	NA	NA	NA	NA
A/Madrid/G130/93	EPI24074	EPI_ISL_4348	Europe / Spain	Human	1993	329	unassigned	unassigned	3.74414	-5.48828	3.36133	c1	1992NH	0.468421	NA	NA	NA	NA	NA
A/Netherlands/179/93	EPI24076	EPI_ISL_4349	Europe / Netherlands	Human	1993	329	unassigned	unassigned	3.63477	-5.35938	3.36914	c1	1992NH	0.39509	NA	NA	NA	NA	NA
A/Enschede/5458/93	EPI24078	EPI_ISL_4350	Europe / Netherlands / Provincie Overijssel / Gemeente Enschede / Enschede	Human	1993	329	unassigned	unassigned	1.51562	-5.98438	5.0625	c1	1992NH	2.39082	NA	NA	NA	NA	NA
A/Madrid/G252/93	EPI24080	EPI_ISL_4351	Europe / Spain	Human	1993	329	unassigned	unassigned	3.63477	-5.375	3.2207	c1	1992NH	0.494736	NA	NA	NA	NA	NA
A/Yamagata/56/93	EPI24082	EPI_ISL_4352	Asia / Japan	Human	1993	329	unassigned	unassigned	4.07812	-5.76562	3.125	c1	1992NH	0.920782	NA	NA	NA	NA	NA
A/Yamagata/61/93	EPI24084	EPI_ISL_4353	Asia / Japan	Human	1993	329	unassigned	unassigned	3.88867	-5.53516	3.24609	c1	1992NH	0.654151	NA	NA	NA	NA	NA
A/Yamagata/62/93	EPI24086	EPI_ISL_4354	Asia / Japan	Human	1993	329	unassigned	unassigned	3.88867	-5.53516	3.24609	c1	1992NH	0.654151	NA	NA	NA	NA	NA
A/Akita/4/93	EPI24088	EPI_ISL_4355	Asia / Japan	Human	1993	329	unassigned	unassigned	3.88477	-5.50781	3.29297	c1	1992NH	0.624623	NA	NA	NA	NA	NA
A/Shiga/6/93	EPI24090	EPI_ISL_4356	Asia / Japan	Human	1993	329	unassigned	unassigned	3.88867	-5.53516	3.24609	c1	1992NH	0.654151	NA	NA	NA	NA	NA
A/Victoria/104/93	EPI24092	EPI_ISL_4357	Oceania / Australia / Victoria	Human	1993	329	unassigned	unassigned	3.42773	-5.66797	2.89453	c1	1992NH	0.739244	NA	NA	NA	NA	NA
A/Wellington/59/93	EPI24094	EPI_ISL_4358	Oceania / New Zealand	Human	1993	329	unassigned	unassigned	3.9375	-5.54688	3.28711	c1	1992NH	0.675929	NA	NA	NA	NA	NA
A/Netherlands/241/93	EPI24098	EPI_ISL_4359	Europe / Netherlands	Human	1993	329	unassigned	unassigned	3.84375	-5.39062	3.24414	c1	1992NH	0.623659	NA	NA	NA	NA	NA
A/Stockholm/20/93	EPI24100	EPI_ISL_4360	Europe / Sweden	Human	1993	329	unassigned	unassigned	3.63477	-5.35938	3.36914	c1	1992NH	0.39509	NA	NA	NA	NA	NA
A/Netherlands/357/93	EPI24102	EPI_ISL_4361	Europe / Netherlands	Human	1993	329	unassigned	unassigned	3.42969	-5.43359	3.28711	c1	1992NH	0.334067	NA	NA	NA	NA	NA
A/Netherlands/440/93	EPI24108	EPI_ISL_4362	Europe / Netherlands	Human	1993	329	unassigned	unassigned	3.08203	-5.33203	3.21875	c1	1992NH	0.492428	NA	NA	NA	NA	NA
A/Netherlands/399/93	EPI24112	EPI_ISL_4363	Europe / Netherlands	Human	1993	329	unassigned	unassigned	3.24219	-5.41406	3.26367	c1	1992NH	0.364413	NA	NA	NA	NA	NA
A/Lyon/672/93	EPI24114	EPI_ISL_4364	Europe / France	Human	1993	329	unassigned	unassigned	3.72852	-5.46484	3.41602	c1	1992NH	0.428739	NA	NA	NA	NA	NA
A/Lyon/1803/93	EPI24116	EPI_ISL_4365	Europe / France	Human	1993	329	unassigned	unassigned	3.0918	-5.42578	3.10547	c1	1992NH	0.563981	NA	NA	NA	NA	NA
A/Lyon/1815/93	EPI24118	EPI_ISL_4366	Europe / France	Human	1993	329	unassigned	unassigned	3.73047	-5.39062	3.21484	c1	1992NH	0.557481	NA	NA	NA	NA	NA
A/Lyon/22686/93	EPI24120	EPI_ISL_4367	Europe / France	Human	1993	329	unassigned	unassigned	3.80859	-5.46094	3.04492	c1	1992NH	0.728427	NA	NA	NA	NA	NA
A/Lyon/23602/93	EPI24122	EPI_ISL_4368	Europe / France	Human	1993	329	unassigned	unassigned	3.87891	-5.41016	3.20117	c1	1992NH	0.674465	NA	NA	NA	NA	NA
A/Oslo/2352/93	EPI24126	EPI_ISL_4370	Europe / Norway	Human	1993	329	unassigned	unassigned	2.90234	-5.23828	3.37891	c1	1992NH	0.555254	NA	NA	NA	NA	NA
A/Oslo/2219/93	EPI24124	EPI_ISL_4369	Europe / Norway	Human	1993	329	unassigned	unassigned	3.84375	-5.37109	3.24414	c1	1992NH	0.626921	NA	NA	NA	NA	NA
A/Singapore/3/93	EPI24200	EPI_ISL_4402	Asia / Singapore	Human	1993	329	unassigned	unassigned	3.74414	-5.48828	3.36133	c1	1992NH	0.468421	NA	NA	NA	NA	NA
A/New York/751/1993	EPI34921	EPI_ISL_5407	North America / United States / New York	Human	1993-11-08	329	unassigned	unassigned	3.91602	-5.50391	3.18945	c1	1993NH	0.249513	NA	NA	NA	NA	NA
A/New York/712/1993	EPI35624	EPI_ISL_5443	North America / United States / New York	Human	1993-12-02	329	unassigned	unassigned	3.83984	-5.38281	3.23633	c1	1993NH	0.159347	NA	NA	NA	NA	NA
A/New York/752/1993	EPI35795	EPI_ISL_5452	North America / United States / New York	Human	1993-12-30	329	unassigned	unassigned	3.84375	-5.39062	3.24414	c1	1993NH	0.158	NA	NA	NA	NA	NA
A/New York/763/1993	EPI36327	EPI_ISL_5480	North America / United States / New York	Human	1993-03-26	329	unassigned	unassigned	3.5918	-5.10156	3.53125	c1	1993SH	0.301209	NA	NA	NA	NA	NA
A/New York/756/1993	EPI36213	EPI_ISL_5474	North America / United States / New York	Human	1993-02-02	329	unassigned	unassigned	3.63477	-5.35938	3.36914	c1	1993SH	0.068134	NA	NA	NA	NA	NA
A/New York/760/1993	EPI36270	EPI_ISL_5477	North America / United States / New York	Human	1993-02-09	329	unassigned	unassigned	3.75	-5.48828	3.35547	c1	1993SH	0.201838	NA	NA	NA	NA	NA
A/New York/758/1993	EPI36232	EPI_ISL_5475	North America / United States / New York	Human	1993-02-03	329	unassigned	unassigned	3.49609	-5.38281	4.35938	c1	1993SH	0.947152	NA	NA	NA	NA	NA
A/New York/759/1993	EPI36251	EPI_ISL_5476	North America / United States / New York	Human	1993-03-08	329	unassigned	unassigned	3.63477	-5.35938	3.36914	c1	1993SH	0.068134	NA	NA	NA	NA	NA
A/New York/762/1993	EPI36308	EPI_ISL_5479	North America / United States / New York	Human	1993-02-04	329	unassigned	unassigned	3.63477	-5.35938	3.36914	c1	1993SH	0.068134	NA	NA	NA	NA	NA
A/New York/764/1993	EPI36346	EPI_ISL_5481	North America / United States / New York	Human	1993-02-23	329	unassigned	unassigned	3.63477	-5.35938	3.36914	c1	1993SH	0.068134	NA	NA	NA	NA	NA
A/New York/765/1993	EPI36365	EPI_ISL_5482	North America / United States / New York	Human	1993-03-03	329	unassigned	unassigned	3.63477	-5.35938	3.36914	c1	1993SH	0.068134	NA	NA	NA	NA	NA
A/New York/767/1993	EPI37638	EPI_ISL_5549	North America / United States / New York	Human	1993-04-05	329	unassigned	unassigned	3.54297	-5.35547	3.39258	c1	1993SH	0.0593005	NA	NA	NA	NA	NA
A/New York/770/1993	EPI37657	EPI_ISL_5550	North America / United States / New York	Human	1993-03-04	329	unassigned	unassigned	3.75977	-5.47656	3.35938	c1	1993SH	0.202681	NA	NA	NA	NA	NA
A/New York/771/1993	EPI37676	EPI_ISL_5551	North America / United States / New York	Human	1993-04-19	329	unassigned	unassigned	3.48047	-5.33984	3.33789	c1	1993SH	0.141793	NA	NA	NA	NA	NA
A/New York/775/1993	EPI37695	EPI_ISL_5552	North America / United States / New York	Human	1993-03-11	329	unassigned	unassigned	3.64062	-5.35156	3.36719	c1	1993SH	0.0759452	NA	NA	NA	NA	NA
A/New York/777/1993	EPI37714	EPI_ISL_5553	North America / United States / New York	Human	1993-03-20	329	unassigned	unassigned	3.63477	-5.35938	3.36914	c1	1993SH	0.068134	NA	NA	NA	NA	NA
A/New York/778/1993	EPI37733	EPI_ISL_5554	North America / United States / New York	Human	1993-02-02	329	unassigned	unassigned	3.63477	-5.35938	3.36914	c1	1993SH	0.068134	NA	NA	NA	NA	NA
A/New York/779/1993	EPI37752	EPI_ISL_5555	North America / United States / New York	Human	1993-02-01	329	unassigned	unassigned	3.63477	-5.35938	3.36914	c1	1993SH	0.068134	NA	NA	NA	NA	NA
A/New York/786/1993	EPI37771	EPI_ISL_5556	North America / United States / New York	Human	1993-03-16	329	unassigned	unassigned	3.63477	-5.35938	3.36914	c1	1993SH	0.068134	NA	NA	NA	NA	NA
A/New York/755/1993	EPI38702	EPI_ISL_5605	North America / United States / New York	Human	1993-03-12	329	unassigned	unassigned	3.64062	-5.35156	3.36719	c1	1993SH	0.0759452	NA	NA	NA	NA	NA
A/New York/754/1993	EPI38683	EPI_ISL_5604	North America / United States / New York	Human	1993-01-16	329	unassigned	unassigned	3.73242	-5.48828	3.36523	c1	1992NH	0.456396	NA	NA	NA	NA	NA
A/New York/781/1993	EPI38721	EPI_ISL_5606	North America / United States / New York	Human	1993-03-26	329	unassigned	unassigned	3.63477	-5.35938	3.36914	c1	1993SH	0.068134	NA	NA	NA	NA	NA
A/New York/782/1993	EPI38740	EPI_ISL_5607	North America / United States / New York	Human	1993-04-03	329	unassigned	unassigned	3.76367	-5.51562	3.38086	c1	1993SH	0.222371	NA	NA	NA	NA	NA
A/New York/783/1993	EPI38759	EPI_ISL_5608	North America / United States / New York	Human	1993-04-01	329	unassigned	unassigned	3.67383	-5.33203	3.40234	c1	1993SH	0.0969676	NA	NA	NA	NA	NA
A/New York/785/1993	EPI38778	EPI_ISL_5609	North America / United States / New York	Human	1993-03-26	329	unassigned	unassigned	3.63477	-5.35938	3.36914	c1	1993SH	0.068134	NA	NA	NA	NA	NA
A/New York/757/1993	EPI39721	EPI_ISL_5659	North America / United States / New York	Human	1993-03-26	329	unassigned	unassigned	3.5	-5.35156	3.41992	c1	1993SH	0.0954521	NA	NA	NA	NA	NA
A/New York/768/1993	EPI39759	EPI_ISL_5661	North America / United States / New York	Human	1993-03-09	329	unassigned	unassigned	3.63477	-5.35938	3.36914	c1	1993SH	0.068134	NA	NA	NA	NA	NA
A/New York/766/1993	EPI39740	EPI_ISL_5660	North America / United States / New York	Human	1993-02-15	329	unassigned	unassigned	3.63477	-5.35938	3.36914	c1	1993SH	0.068134	NA	NA	NA	NA	NA
A/New York/769/1993	EPI39778	EPI_ISL_5662	North America / United States / New York	Human	1993-03-16	329	unassigned	unassigned	3.63477	-5.35938	3.36914	c1	1993SH	0.068134	NA	NA	NA	NA	NA
A/New York/773/1993	EPI39816	EPI_ISL_5664	North America / United States / New York	Human	1993-03-31	329	unassigned	unassigned	3.54297	-5.35547	3.39258	c1	1993SH	0.0593005	NA	NA	NA	NA	NA
A/New York/774/1993	EPI39835	EPI_ISL_5665	North America / United States / New York	Human	1993-02-25	329	unassigned	unassigned	3.63477	-5.35938	3.36914	c1	1993SH	0.068134	NA	NA	NA	NA	NA
A/New York/780/1993	EPI39873	EPI_ISL_5667	North America / United States / New York	Human	1993-03-02	329	unassigned	unassigned	3.66211	-5.44141	3.25586	c1	1993SH	0.186443	NA	NA	NA	NA	NA
A/New York/776/1993	EPI39854	EPI_ISL_5666	North America / United States / New York	Human	1993-02-18	329	unassigned	unassigned	3.63477	-5.35938	3.36914	c1	1993SH	0.068134	NA	NA	NA	NA	NA
A/New York/784/1993	EPI39892	EPI_ISL_5668	North America / United States / New York	Human	1993-04-19	329	unassigned	unassigned	3.63477	-5.35938	3.36914	c1	1993SH	0.068134	NA	NA	NA	NA	NA
A/New York/788/1993	EPI39930	EPI_ISL_5670	North America / United States / New York	Human	1993-02-26	329	unassigned	unassigned	3.63477	-5.35938	3.36914	c1	1993SH	0.068134	NA	NA	NA	NA	NA
A/New York/792/1993	EPI40006	EPI_ISL_5674	North America / United States / New York	Human	1993-03-09	329	unassigned	unassigned	3.63477	-5.35938	3.36914	c1	1993SH	0.068134	NA	NA	NA	NA	NA
A/New York/794/1993	EPI40025	EPI_ISL_5675	North America / United States / New York	Human	1993-03-04	329	unassigned	unassigned	3.74805	-5.46875	3.31641	c1	1993SH	0.206435	NA	NA	NA	NA	NA
A/New York/798/1993	EPI40082	EPI_ISL_5678	North America / United States / New York	Human	1993-03-09	329	unassigned	unassigned	3.63477	-5.35938	3.36914	c1	1993SH	0.068134	NA	NA	NA	NA	NA
A/New York/791/1993	EPI39987	EPI_ISL_5673	North America / United States / New York	Human	1993-03-11	329	unassigned	unassigned	3.625	-5.38281	3.33203	c1	1993SH	0.0915512	NA	NA	NA	NA	NA
A/New York/795/1993	EPI40044	EPI_ISL_5676	North America / United States / New York	Human	1993-02-04	329	unassigned	unassigned	3.63477	-5.35938	3.36914	c1	1993SH	0.068134	NA	NA	NA	NA	NA
A/New York/787/1993	EPI39911	EPI_ISL_5669	North America / United States / New York	Human	1993-03-10	329	unassigned	unassigned	3.63477	-5.35938	3.36914	c1	1993SH	0.068134	NA	NA	NA	NA	NA
A/New York/790/1993	EPI39968	EPI_ISL_5672	North America / United States / New York	Human	1993-02-04	329	unassigned	unassigned	3.63477	-5.35938	3.36914	c1	1993SH	0.068134	NA	NA	NA	NA	NA
A/New York/797/1993	EPI40063	EPI_ISL_5677	North America / United States / New York	Human	1993-03-16	329	unassigned	unassigned	3.63477	-5.35938	3.36914	c1	1993SH	0.068134	NA	NA	NA	NA	NA
A/New York/789/1993	EPI39949	EPI_ISL_5671	North America / United States / New York	Human	1993-04-05	329	unassigned	unassigned	3.48047	-5.32422	3.38281	c1	1993SH	0.128544	NA	NA	NA	NA	NA
A/New York/799/1993	EPI40101	EPI_ISL_5679	North America / United States / New York	Human	1993-03-10	329	unassigned	unassigned	3.63477	-5.35938	3.36914	c1	1993SH	0.068134	NA	NA	NA	NA	NA
A/New York/801/1993	EPI40120	EPI_ISL_5680	North America / United States / New York	Human	1993-03-10	329	unassigned	unassigned	3.63477	-5.35938	3.36914	c1	1993SH	0.068134	NA	NA	NA	NA	NA
A/New York/803/1993	EPI40158	EPI_ISL_5682	North America / United States / New York	Human	1993-03-09	329	unassigned	unassigned	3.63477	-5.35938	3.36914	c1	1993SH	0.068134	NA	NA	NA	NA	NA
A/New York/802/1993	EPI40139	EPI_ISL_5681	North America / United States / New York	Human	1993-03-02	329	unassigned	unassigned	3.63477	-5.35938	3.36914	c1	1993SH	0.068134	NA	NA	NA	NA	NA
A/New York/793/1993	EPI40999	EPI_ISL_5726	North America / United States / New York	Human	1993-02-02	329	unassigned	unassigned	3.52734	-5.34766	3.33984	c1	1993SH	0.105193	NA	NA	NA	NA	NA
A/New York/796/1993	EPI41018	EPI_ISL_5727	North America / United States / New York	Human	1993-02-18	329	unassigned	unassigned	3.63477	-5.35938	3.36914	c1	1993SH	0.068134	NA	NA	NA	NA	NA
A/New York/706/1993	EPI46269	EPI_ISL_6337	North America / United States / New York	Human	1993-12-30	329	unassigned	unassigned	3.77734	-5.375	3.23633	c1	1993NH	0.112254	NA	NA	NA	NA	NA
A/New York/800/1993	EPI46402	EPI_ISL_6344	North America / United States / New York	Human	1993-03-11	329	unassigned	unassigned	3.63477	-5.35938	3.36914	c1	1993SH	0.068134	NA	NA	NA	NA	NA
A/Hokkaido/1/1993	EPI80660	EPI_ISL_8295	Asia / Japan / Hokkaido	Human	1993	329	unassigned	unassigned	3.86523	-6.72266	3.55859	c1	1992NH	1.34321	NA	NA	NA	NA	NA
A/Hokkaido/2/1993	EPI80662	EPI_ISL_8296	Asia / Japan / Hokkaido	Human	1993	329	unassigned	unassigned	3.91211	-6.30859	4.14062	c1	1992NH	1.13381	NA	NA	NA	NA	NA
A/Sydney/2/1993	EPI567796	EPI_ISL_173280	Oceania / Australia / New South Wales	Human	1993	329	unassigned	unassigned	3.54883	-5.63672	3.33008	c1	1992NH	0.375142	NA	NA	NA	NA	NA
A/Netherlands/179/1993	EPI1868435	EPI_ISL_2402552	Europe / Netherlands	Human	1993-01-01	329	unassigned	unassigned	3.52734	-5.34766	3.33984	c1	1992NH	0.350927	NA	NA	NA	NA	NA
A/Lyon/22686/1993	EPI362633	EPI_ISL_111019	Europe / France	Human	1993-12-02	329	unassigned	unassigned	3.73047	-5.39062	3.21484	c1	1993NH	0.0934348	NA	NA	NA	NA	NA
A/Madrid/G102/1993	EPI362639	EPI_ISL_111020	Europe / Spain / Madrid	Human	1993	329	unassigned	unassigned	3.74414	-5.48828	3.36133	c1	1992NH	0.468421	NA	NA	NA	NA	NA
A/Netherlands/17/1993	EPI362658	EPI_ISL_111042	Europe / Netherlands	Human	1993-01-01	329	unassigned	unassigned	3.35742	-5.30469	4.16797	c1	1992NH	0.590392	NA	NA	NA	NA	NA
A/Netherlands/179/1993	EPI362677	EPI_ISL_111045	Europe / Netherlands	Human	1993-02-26	329	unassigned	unassigned	3.52734	-5.34766	3.33984	c1	1993SH	0.105193	NA	NA	NA	NA	NA
A/Netherlands/241/1993	EPI362670	EPI_ISL_111044	Europe / Netherlands	Human	1993-10-13	329	unassigned	unassigned	3.84375	-5.39062	3.24414	c1	1993NH	0.158	NA	NA	NA	NA	NA
A/Singapore/19/1993	EPI362690	EPI_ISL_111080	Asia / Singapore	Human	1993-12-21	329	unassigned	unassigned	3.68359	-5.46875	3.30469	c1	1993NH	0.0404327	NA	NA	NA	NA	NA
A/Stockholm/20/1993	EPI362697	EPI_ISL_111081	Europe / Sweden	Human	1993-11-03	329	unassigned	unassigned	3.63477	-5.35938	3.36914	c1	1993NH	0.125483	NA	NA	NA	NA	NA
A/England/247/1993	EPI131544	EPI_ISL_15014	Europe / United Kingdom	Human	1993	329	unassigned	unassigned	3.57031	-5.33203	3.35742	c1	1992NH	0.369034	NA	NA	NA	NA	NA
A/England/269/93	EPI131546	EPI_ISL_15015	Europe / United Kingdom	Human	1993	329	unassigned	unassigned	3.84375	-5.39062	3.24414	c1	1992NH	0.623659	NA	NA	NA	NA	NA
A/England/1/1993	EPI131542	EPI_ISL_15013	Europe / United Kingdom	Human	1993	329	unassigned	unassigned	1.10059	-5.57031	5.25	c1	1992NH	2.78317	NA	NA	NA	NA	NA
A/England/284/1993	EPI131548	EPI_ISL_15016	Europe / United Kingdom	Human	1993	329	unassigned	unassigned	3.71875	-5.375	3.18359	c1	1992NH	0.5749	NA	NA	NA	NA	NA
A/England/286/1993	EPI131550	EPI_ISL_15017	Europe / United Kingdom	Human	1993	329	unassigned	unassigned	3.84961	-5.39453	3.23828	c1	1992NH	0.631176	NA	NA	NA	NA	NA
A/England/289/1993	EPI131552	EPI_ISL_15018	Europe / United Kingdom	Human	1993	329	unassigned	unassigned	3.6582	-5.57031	3.24414	c1	1992NH	0.486267	NA	NA	NA	NA	NA
A/England/328/1993	EPI131554	EPI_ISL_15019	Europe / United Kingdom	Human	1993	329	unassigned	unassigned	3.84375	-5.39062	3.24414	c1	1992NH	0.623659	NA	NA	NA	NA	NA
A/England/346/1993	EPI131556	EPI_ISL_15020	Europe / United Kingdom	Human	1993	329	unassigned	unassigned	3.53711	-5.51562	3.35938	c1	1992NH	0.314273	NA	NA	NA	NA	NA
A/England/347/1993	EPI131558	EPI_ISL_15021	Europe / United Kingdom	Human	1993	329	unassigned	unassigned	3.91992	-5.37891	3.29688	c1	1992NH	0.661623	NA	NA	NA	NA	NA
A/England/471/1993	EPI131560	EPI_ISL_15022	Europe / United Kingdom	Human	1993	329	unassigned	unassigned	3.66211	-5.625	3.17383	c1	1992NH	0.554114	NA	NA	NA	NA	NA
A/Scotland/2/1993	EPI131580	EPI_ISL_15030	Europe / United Kingdom	Human	1993	329	unassigned	unassigned	1.0752	-5.57422	5.21484	c1	1992NH	2.78334	NA	NA	NA	NA	NA
A/Scotland/160/1993	EPI131584	EPI_ISL_15032	Europe / United Kingdom	Human	1993	329	unassigned	unassigned	3.84375	-5.39062	3.24414	c1	1992NH	0.623659	NA	NA	NA	NA	NA
A/Scotland/142/1993	EPI131582	EPI_ISL_15031	Europe / United Kingdom	Human	1993	329	unassigned	unassigned	3.66211	-5.625	3.17383	c1	1992NH	0.554114	NA	NA	NA	NA	NA
A/Scotland/174/1993	EPI131586	EPI_ISL_15033	Europe / United Kingdom	Human	1993	329	unassigned	unassigned	3.84375	-5.39062	3.24414	c1	1992NH	0.623659	NA	NA	NA	NA	NA
A/Scotland/173/1993	EPI131588	EPI_ISL_15034	Europe / United Kingdom	Human	1993	329	unassigned	unassigned	3.81641	-5.39453	3.2207	c1	1992NH	0.615789	NA	NA	NA	NA	NA
A/Singapore/3/1993	EPI365666	EPI_ISL_114350	Asia / Singapore	Human	1993-01-06	329	unassigned	unassigned	3.91797	-5.69141	3.24805	c1	1992NH	0.706565	NA	NA	NA	NA	NA
A/Akita/4/1993	EPI366187	EPI_ISL_115040	Asia / Japan / Akita	Human	1993	329	unassigned	unassigned	3.88477	-5.50781	3.29297	c1	1992NH	0.624623	NA	NA	NA	NA	NA
A/Enschede/5458/1993	EPI366195	EPI_ISL_115041	Europe / Netherlands	Human	1993	329	unassigned	unassigned	1.51562	-5.98438	5.0625	c1	1992NH	2.39082	NA	NA	NA	NA	NA
A/Lyon/672/1993	EPI366392	EPI_ISL_115111	Europe / France	Human	1993-02-22	329	unassigned	unassigned	3.72852	-5.46484	3.41602	c1	1993SH	0.161459	NA	NA	NA	NA	NA
A/Guangdong/25/1993	EPI366391	EPI_ISL_115110	Asia / China	Human	1993	329	unassigned	unassigned	3.81055	-5.36328	3.25	c1	1992NH	0.59886	NA	NA	NA	NA	NA
A/Lyon/23602/1993	EPI366408	EPI_ISL_115113	Europe / France	Human	1993-12-14	329	unassigned	unassigned	3.84375	-5.39062	3.24414	c1	1993NH	0.158	NA	NA	NA	NA	NA
A/Lyon/1815/1993	EPI366400	EPI_ISL_115112	Europe / France	Human	1993-11-30	329	unassigned	unassigned	3.73047	-5.39062	3.21484	c1	1993NH	0.0934348	NA	NA	NA	NA	NA
A/Madrid/G101/1993	EPI366754	EPI_ISL_115301	Europe / Spain / Madrid	Human	1993	329	unassigned	unassigned	1.21582	-5.69141	5.21875	c1	1992NH	2.67873	NA	NA	NA	NA	NA
A/Madrid/G116/1993	EPI366769	EPI_ISL_115303	Europe / Spain / Madrid	Human	1993	329	unassigned	unassigned	1.21582	-5.69141	5.21875	c1	1992NH	2.67873	NA	NA	NA	NA	NA
A/Madrid/G122/1993	EPI366745	EPI_ISL_115300	Europe / Spain / Madrid	Human	1993	329	unassigned	unassigned	3.52734	-5.34766	3.33984	c1	1992NH	0.350927	NA	NA	NA	NA	NA
A/Madrid/G109/1993	EPI366761	EPI_ISL_115302	Europe / Spain / Madrid	Human	1993	329	unassigned	unassigned	3.60547	-5.3125	3.40039	c1	1992NH	0.374345	NA	NA	NA	NA	NA
A/Netherlands/101/1993	EPI366790	EPI_ISL_115305	Europe / Netherlands	Human	1993-02-15	329	unassigned	unassigned	4.01172	-5.70312	3.11328	c1	1993SH	0.611143	NA	NA	NA	NA	NA
A/Madrid/G252/1993	EPI366784	EPI_ISL_115304	Europe / Spain / Madrid	Human	1993	329	unassigned	unassigned	3.63477	-5.375	3.2207	c1	1992NH	0.494736	NA	NA	NA	NA	NA
A/Netherlands/372/1993	EPI366817	EPI_ISL_115356	Europe / Netherlands	Human	1993-12-01	329	unassigned	unassigned	3.65625	-5.33984	3.37109	c1	1993NH	0.1305	NA	NA	NA	NA	NA
A/Netherlands/126/1993	EPI366793	EPI_ISL_115353	Europe / Netherlands	Human	1993-02-23	329	unassigned	unassigned	3.79492	-5.44922	3.22852	c1	1993SH	0.286125	NA	NA	NA	NA	NA
A/Netherlands/357/1993	EPI366809	EPI_ISL_115355	Europe / Netherlands	Human	1993-12-06	329	unassigned	unassigned	3.6582	-5.57031	3.24414	c1	1993NH	0.150179	NA	NA	NA	NA	NA
A/Netherlands/165/1993	EPI366801	EPI_ISL_115354	Europe / Netherlands	Human	1993-03-05	329	unassigned	unassigned	1.2002	-5.66016	5.21875	c1	1993SH	3.00675	NA	NA	NA	NA	NA
A/Netherlands/398/1993	EPI366825	EPI_ISL_115357	Europe / Netherlands	Human	1993-11-27	329	unassigned	unassigned	3.84375	-5.39062	3.24414	c1	1993NH	0.158	NA	NA	NA	NA	NA
A/Paris/287/1993	EPI366833	EPI_ISL_115358	Europe / France	Human	1993	329	unassigned	unassigned	1.4873	-5.84766	5.10156	c1	1992NH	2.41204	NA	NA	NA	NA	NA
A/Scotland/160/1993	EPI366849	EPI_ISL_115409	Europe / United Kingdom	Human	1993	329	unassigned	unassigned	3.89453	-5.38281	3.25586	c1	1992NH	0.659854	NA	NA	NA	NA	NA
A/Scotland/142/1993	EPI366841	EPI_ISL_115408	Europe / United Kingdom	Human	1993	329	unassigned	unassigned	3.24414	-5.40234	3.80664	c1	1992NH	0.239261	NA	NA	NA	NA	NA
A/Yamagata/61/1993	EPI366881	EPI_ISL_115413	Asia / Japan / Yamagata	Human	1993	329	unassigned	unassigned	3.88867	-5.53516	3.24609	c1	1992NH	0.654151	NA	NA	NA	NA	NA
A/Yamagata/56/1993	EPI366873	EPI_ISL_115412	Asia / Japan / Yamagata	Human	1993	329	unassigned	unassigned	3.88867	-5.53516	3.24609	c1	1992NH	0.654151	NA	NA	NA	NA	NA
A/Shangdong/9/1993	EPI366857	EPI_ISL_115410	Asia / China	Human	1993	329	unassigned	unassigned	3.70898	-5.41016	3.10156	c1	1992NH	0.62675	NA	NA	NA	NA	NA
A/Netherlands/440/1993	EPI1244399	EPI_ISL_312618	Europe / Netherlands	Human	1993-01-01	329	unassigned	unassigned	3.08203	-5.33203	3.21875	c1	1992NH	0.492428	NA	NA	NA	NA	NA
A/Netherlands/179/1993	EPI297778	EPI_ISL_84897	Europe / Netherlands	Human	1993	329	unassigned	unassigned	3.52734	-5.34766	3.33984	c1	1992NH	0.350927	NA	NA	NA	NA	NA
A/Nanchang/58/1993	EPI91124	EPI_ISL_21030	Asia / China	Human	1993	329	unassigned	unassigned	3.75391	-5.45312	3.23438	c1	1992NH	0.553704	NA	NA	NA	NA	NA
A/Shangdong/9/1993	EPI171276	EPI_ISL_27622	Asia / China	Human	1993	329	unassigned	unassigned	3.80859	-5.53125	3.02148	c1	1992NH	0.747645	NA	NA	NA	NA	NA
A/Victoria/1/1993	EPI2120525	EPI_ISL_14284883	Oceania / Australia / Victoria / Parkville	Human	1993-01-25	329	unassigned	unassigned	3.74414	-5.39844	3.4668	c1	1992NH	0.431813	NA	NA	NA	NA	NA
A/Wellington/96/1993	EPI2120651	EPI_ISL_14284919	Oceania / New Zealand / Wellington	Human	1993	329	unassigned	unassigned	3.22461	-5.26953	3.53711	c1	1992NH	0.256391	NA	NA	NA	NA	NA
A/Wellington/25/1993	EPI2120643	EPI_ISL_14284915	Oceania / New Zealand / Wellington	Human	1993	329	unassigned	unassigned	3.63477	-5.35938	3.36914	c1	1992NH	0.39509	NA	NA	NA	NA	NA
A/Netherlands/179/1993	EPI2120345	EPI_ISL_14284835	Europe / Netherlands / South Holland / Gemeente Rotterdam	Human	1993	329	unassigned	unassigned	3.52734	-5.34766	3.33984	c1	1992NH	0.350927	NA	NA	NA	NA	NA
A/Mexico/3255/94	EPI3679	EPI_ISL_711	North America / Mexico	Human	1994	329	unassigned	unassigned	0.749512	-5.60547	5.09375	c1	1993NH	3.46107	NA	NA	NA	NA	NA
A/Hong_Kong/55/94	EPI3877	EPI_ISL_808	Asia / Hong Kong (SAR)	Human	1994	329	unassigned	unassigned	3.82617	-5.29688	3.17773	c1	1993NH	0.218668	NA	NA	NA	NA	NA
A/Hong_Kong/1/94	EPI3875	EPI_ISL_807	Asia / Hong Kong (SAR)	Human	1994	329	unassigned	unassigned	3.86719	-5.32422	3.13672	c1	1993NH	0.253325	NA	NA	NA	NA	NA
A/Thailand/75/94	EPI3917	EPI_ISL_827	Asia / Thailand	Human	1994	329	unassigned	unassigned	3.09961	-5.15234	3.89648	c1	1993NH	0.89717	NA	NA	NA	NA	NA
A/New_York/16/94	EPI3921	EPI_ISL_829	North America / United States / New York	Human	1994	329	unassigned	unassigned	2.44922	-6.25781	3.06445	c1	1993NH	1.51438	NA	NA	NA	NA	NA
A/Texas/5/94	EPI3899	EPI_ISL_818	North America / United States / Texas	Human	1994	329	unassigned	unassigned	3.50195	-5.47266	2.86133	c1	1993NH	0.474988	NA	NA	NA	NA	NA
A/France/1109/94	EPI3929	EPI_ISL_833	Europe / France	Human	1994	329	unassigned	unassigned	3.6582	-5.57031	3.24414	c1	1993NH	0.150179	NA	NA	NA	NA	NA
A/Russia/46967/94	EPI3931	EPI_ISL_834	Europe / Russian Federation	Human	1994	329	unassigned	unassigned	3.43164	-5.42188	3.74023	c1	1993NH	0.522604	NA	NA	NA	NA	NA
A/Romania/160/94	EPI3983	EPI_ISL_860	Europe / Romania	Human	1994	329	unassigned	unassigned	4.07422	-5.34375	3.29688	c1	1993NH	0.385552	NA	NA	NA	NA	NA
A/Vermont/3/94	EPI3995	EPI_ISL_866	North America / United States / Vermont	Human	1994	329	unassigned	unassigned	3.91211	-5.39453	3.19727	c1	1993NH	0.236001	NA	NA	NA	NA	NA
A/France/1203/94	EPI4001	EPI_ISL_869	Europe / France	Human	1994	329	unassigned	unassigned	3.68945	-5.41016	3.15234	c1	1993NH	0.141612	NA	NA	NA	NA	NA
A/Guangdong/27/94	EPI4027	EPI_ISL_882	Asia / China / Guangdong Province	Human	1994	329	unassigned	unassigned	3.40234	-5.42578	3.10547	c1	1993NH	0.35064	NA	NA	NA	NA	NA
A/California/4/94	EPI4041	EPI_ISL_889	North America / United States / California	Human	1994	329	unassigned	unassigned	3.25	-5.21094	1.24121	c1	1993NH	2.11086	NA	NA	NA	NA	NA
A/New_York/15/94	EPI4051	EPI_ISL_894	North America / United States / New York	Human	1994	329	unassigned	unassigned	3.03516	-4.97656	1.45508	c1	1993NH	2.00579	NA	NA	NA	NA	NA
A/Harbin/3/94	EPI4043	EPI_ISL_890	Asia / China	Human	1994	329	unassigned	unassigned	3.56836	-4.97266	2.69727	c1	1993NH	0.763645	NA	NA	NA	NA	NA
A/Santiago/7198/94	EPI4049	EPI_ISL_893	South America / Chile	Human	1994	329	unassigned	unassigned	3.57031	-5.22656	3.45117	c1	1993NH	0.291755	NA	NA	NA	NA	NA
A/Brisbane/22/1994	EPI545284	EPI_ISL_167246	Oceania / Australia	Human	1994	329	unassigned	unassigned	3.8457	-5.42969	3.17773	c1	1993NH	0.185441	NA	NA	NA	NA	NA
A/Wellington/1/1994	EPI545283	EPI_ISL_167245	Oceania / New Zealand	Human	1994	329	unassigned	unassigned	3.57617	-5.30469	3.39453	c1	1993NH	0.206104	NA	NA	NA	NA	NA
A/Victoria/9/1994	EPI545288	EPI_ISL_167250	Oceania / Australia	Human	1994	329	unassigned	unassigned	3.83008	-5.35156	3.33398	c1	1993NH	0.160176	NA	NA	NA	NA	NA
A/Johannesburg/33/1994	EPI545290	EPI_ISL_167252	Africa / South Africa	Human	1994	329	unassigned	unassigned	4.04297	-5.32031	3.17969	c1	1993NH	0.378776	NA	NA	NA	NA	NA
A/Hongkong/1/94	EPI24128	EPI_ISL_4371	Asia / Hong Kong (SAR)	Human	1994	329	unassigned	unassigned	3.98047	-5.30469	3.20508	c1	1993NH	0.321227	NA	NA	NA	NA	NA
A/Hongkong/56/94	EPI24134	EPI_ISL_4374	Asia / Hong Kong (SAR)	Human	1994	329	unassigned	unassigned	3.62305	-5.38281	3.33008	c1	1993NH	0.0996047	NA	NA	NA	NA	NA
A/South_Australia/15/94	EPI24130	EPI_ISL_4372	Oceania / Australia / South Australia	Human	1994	329	unassigned	unassigned	3.83008	-5.35156	3.33398	c1	1993NH	0.160176	NA	NA	NA	NA	NA
A/South_Australia/25/94	EPI24132	EPI_ISL_4373	Oceania / Australia / South Australia	Human	1994	329	unassigned	unassigned	3.83008	-5.35156	3.33398	c1	1993NH	0.160176	NA	NA	NA	NA	NA
A/Johannesburg/47/94	EPI24136	EPI_ISL_4375	Africa / South Africa	Human	1994	329	unassigned	unassigned	3.83789	-5.30469	3.57422	c1	1993NH	0.34023	NA	NA	NA	NA	NA
A/Hongkong/55/94	EPI24186	EPI_ISL_4395	Asia / Hong Kong (SAR)	Human	1994	329	unassigned	unassigned	3.98047	-5.30469	3.20508	c1	1993NH	0.321227	NA	NA	NA	NA	NA
A/Philippines/2/82/BS/ML10	EPI242889	EPI_ISL_70052	Asia / Philippines	Human	1994	329	unassigned	unassigned	2.52148	-7.61719	3.30664	c1	1993NH	2.4808	NA	NA	NA	NA	NA
A/New York/733/1994	EPI33584	EPI_ISL_5337	North America / United States / New York	Human	1994-02-07	329	unassigned	unassigned	3.82812	-5.38672	3.26562	c1	1994SH	0.0522622	NA	NA	NA	NA	NA
A/New York/696/1994	EPI34351	EPI_ISL_5378	North America / United States / New York	Human	1994-12-30	329	unassigned	unassigned	3.72852	-5.5	2.95312	c1	1994NH	1.38175	NA	NA	NA	NA	NA
A/New York/708/1994	EPI34446	EPI_ISL_5383	North America / United States / New York	Human	1994-01-11	329	unassigned	unassigned	3.84375	-5.39062	3.24414	c1	1993NH	0.158	NA	NA	NA	NA	NA
A/New York/732/1994	EPI34465	EPI_ISL_5384	North America / United States / New York	Human	1994-01-06	329	unassigned	unassigned	3.89453	-5.38281	3.25586	c1	1993NH	0.204857	NA	NA	NA	NA	NA
A/New York/654/1994	EPI34712	EPI_ISL_5396	North America / United States / New York	Human	1994-11-03	329	unassigned	unassigned	3.13672	-6.14453	3.27344	c1	1994NH	1.28182	NA	NA	NA	NA	NA
A/New York/659/1994	EPI34750	EPI_ISL_5398	North America / United States / New York	Human	1994-12-08	329	unassigned	unassigned	3.83594	-5.39844	3.07422	c1	1994NH	1.53772	NA	NA	NA	NA	NA
A/New York/665/1994	EPI34788	EPI_ISL_5400	North America / United States / New York	Human	1994-12-16	329	unassigned	unassigned	3.17383	-5.63281	2.36328	c1	1994NH	0.698397	NA	NA	NA	NA	NA
A/New York/711/1994	EPI35605	EPI_ISL_5442	North America / United States / New York	Human	1994-01-12	329	unassigned	unassigned	3.84375	-5.39062	3.24414	c1	1993NH	0.158	NA	NA	NA	NA	NA
A/New York/709/1994	EPI35586	EPI_ISL_5441	North America / United States / New York	Human	1994-01-06	329	unassigned	unassigned	3.84375	-5.39062	3.24414	c1	1993NH	0.158	NA	NA	NA	NA	NA
A/New York/715/1994	EPI35643	EPI_ISL_5444	North America / United States / New York	Human	1994-07-29	329	unassigned	unassigned	3.44922	-5.27734	3.38281	c1	1994SH	0.363297	NA	NA	NA	NA	NA
A/New York/720/1994	EPI35700	EPI_ISL_5447	North America / United States / New York	Human	1994-01-24	329	unassigned	unassigned	3.84375	-5.39062	3.24414	c1	1993NH	0.158	NA	NA	NA	NA	NA
A/New York/716/1994	EPI35662	EPI_ISL_5445	North America / United States / New York	Human	1994-01-17	329	unassigned	unassigned	3.58789	-5.32812	3.41797	c1	1993NH	0.198983	NA	NA	NA	NA	NA
A/New York/719/1994	EPI35681	EPI_ISL_5446	North America / United States / New York	Human	1994-01-20	329	unassigned	unassigned	3.84375	-5.39062	3.24414	c1	1993NH	0.158	NA	NA	NA	NA	NA
A/New York/726/1994	EPI35738	EPI_ISL_5449	North America / United States / New York	Human	1994-02-09	329	unassigned	unassigned	3.84375	-5.39062	3.24414	c1	1994SH	0.0702479	NA	NA	NA	NA	NA
A/New York/721/1994	EPI35719	EPI_ISL_5448	North America / United States / New York	Human	1994-01-13	329	unassigned	unassigned	3.84375	-5.39062	3.24414	c1	1993NH	0.158	NA	NA	NA	NA	NA
A/New York/727/1994	EPI35757	EPI_ISL_5450	North America / United States / New York	Human	1994-01-31	329	unassigned	unassigned	3.84375	-5.39062	3.24414	c1	1993NH	0.158	NA	NA	NA	NA	NA
A/New York/728/1994	EPI35776	EPI_ISL_5451	North America / United States / New York	Human	1994-02-01	329	unassigned	unassigned	3.84375	-5.39062	3.24414	c1	1994SH	0.0702479	NA	NA	NA	NA	NA
A/New York/657/1994	EPI36441	EPI_ISL_5486	North America / United States / New York	Human	1994-12-02	329	unassigned	unassigned	3.94727	-5.1875	3.30273	c1	1994NH	1.77755	NA	NA	NA	NA	NA
A/New York/722/1994	EPI36536	EPI_ISL_5491	North America / United States / New York	Human	1994-03-02	329	unassigned	unassigned	3.83203	-5.45703	3.10938	c1	1994SH	0.181976	NA	NA	NA	NA	NA
A/New York/729/1994	EPI36555	EPI_ISL_5492	North America / United States / New York	Human	1994-02-25	329	unassigned	unassigned	3.84375	-5.39062	3.24414	c1	1994SH	0.0702479	NA	NA	NA	NA	NA
A/New York/730/1994	EPI36574	EPI_ISL_5493	North America / United States / New York	Human	1994-01-04	329	unassigned	unassigned	3.88086	-5.41797	3.21484	c1	1993NH	0.197672	NA	NA	NA	NA	NA
A/New York/734/1994	EPI36593	EPI_ISL_5494	North America / United States / New York	Human	1994-01-06	329	unassigned	unassigned	3.84375	-5.39062	3.24414	c1	1993NH	0.158	NA	NA	NA	NA	NA
A/New York/655/1994	EPI36973	EPI_ISL_5514	North America / United States / New York	Human	1994-11-17	329	unassigned	unassigned	3.77734	-5.375	3.23633	c1	1994NH	1.5733	NA	NA	NA	NA	NA
A/New York/661/1994	EPI36992	EPI_ISL_5515	North America / United States / New York	Human	1994-12-15	329	unassigned	unassigned	3.72852	-5.5	2.95312	c1	1994NH	1.38175	NA	NA	NA	NA	NA
A/New York/663/1994	EPI37011	EPI_ISL_5516	North America / United States / New York	Human	1994-12-20	329	unassigned	unassigned	3.72852	-5.5	2.95312	c1	1994NH	1.38175	NA	NA	NA	NA	NA
A/New York/705/1994	EPI37163	EPI_ISL_5524	North America / United States / New York	Human	1994-01-31	329	unassigned	unassigned	3.6582	-5.57031	3.24414	c1	1993NH	0.150179	NA	NA	NA	NA	NA
A/New York/707/1994	EPI37182	EPI_ISL_5525	North America / United States / New York	Human	1994-02-10	329	unassigned	unassigned	3.89453	-5.38281	3.25586	c1	1994SH	0.117028	NA	NA	NA	NA	NA
A/New York/710/1994	EPI37201	EPI_ISL_5526	North America / United States / New York	Human	1994-02-09	329	unassigned	unassigned	3.87109	-5.44531	3.19336	c1	1994SH	0.136277	NA	NA	NA	NA	NA
A/New York/713/1994	EPI37220	EPI_ISL_5527	North America / United States / New York	Human	1994-02-14	329	unassigned	unassigned	3.84375	-5.39062	3.24414	c1	1994SH	0.0702479	NA	NA	NA	NA	NA
A/New York/714/1994	EPI37239	EPI_ISL_5528	North America / United States / New York	Human	1994-01-14	329	unassigned	unassigned	3.8457	-5.37891	3.24805	c1	1993NH	0.16226	NA	NA	NA	NA	NA
A/New York/747/1994	EPI37277	EPI_ISL_5530	North America / United States / New York	Human	1994-01-12	329	unassigned	unassigned	3.76367	-5.34375	3.29492	c1	1993NH	0.110778	NA	NA	NA	NA	NA
A/New York/746/1994	EPI37258	EPI_ISL_5529	North America / United States / New York	Human	1994-02-21	329	unassigned	unassigned	3.82227	-5.35938	3.26172	c1	1994SH	0.0460255	NA	NA	NA	NA	NA
A/New York/748/1994	EPI37296	EPI_ISL_5531	North America / United States / New York	Human	1994-01-17	329	unassigned	unassigned	4.01562	-5.34375	3.17188	c1	1993NH	0.349948	NA	NA	NA	NA	NA
A/New York/749/1994	EPI37315	EPI_ISL_5532	North America / United States / New York	Human	1994-01-11	329	unassigned	unassigned	3.86133	-5.46875	3.14062	c1	1993NH	0.224116	NA	NA	NA	NA	NA
A/New York/718/1994	EPI38132	EPI_ISL_5575	North America / United States / New York	Human	1994-02-09	329	unassigned	unassigned	3.84375	-5.39062	3.24414	c1	1994SH	0.0702479	NA	NA	NA	NA	NA
A/New York/723/1994	EPI38151	EPI_ISL_5576	North America / United States / New York	Human	1994-01-02	329	unassigned	unassigned	3.84375	-5.39062	3.24414	c1	1993NH	0.158	NA	NA	NA	NA	NA
A/New York/724/1994	EPI38170	EPI_ISL_5577	North America / United States / New York	Human	1994-01-27	329	unassigned	unassigned	3.82812	-5.39453	3.25781	c1	1993NH	0.138793	NA	NA	NA	NA	NA
A/New York/725/1994	EPI38189	EPI_ISL_5578	North America / United States / New York	Human	1994-01-30	329	unassigned	unassigned	3.84375	-5.39062	3.24414	c1	1993NH	0.158	NA	NA	NA	NA	NA
A/New York/736/1994	EPI38227	EPI_ISL_5580	North America / United States / New York	Human	1994-01-21	329	unassigned	unassigned	3.84375	-5.38281	3.24219	c1	1993NH	0.160906	NA	NA	NA	NA	NA
A/New York/735/1994	EPI38208	EPI_ISL_5579	North America / United States / New York	Human	1994-01-14	329	unassigned	unassigned	3.4707	-5.37109	3.52148	c1	1993NH	0.330296	NA	NA	NA	NA	NA
A/New York/738/1994	EPI38246	EPI_ISL_5581	North America / United States / New York	Human	1994-02-04	329	unassigned	unassigned	3.84375	-5.39062	3.24414	c1	1994SH	0.0702479	NA	NA	NA	NA	NA
A/New York/739/1994	EPI38265	EPI_ISL_5582	North America / United States / New York	Human	1994-02-14	329	unassigned	unassigned	3.84375	-5.39062	3.24414	c1	1994SH	0.0702479	NA	NA	NA	NA	NA
A/New York/740/1994	EPI38284	EPI_ISL_5583	North America / United States / New York	Human	1994-01-15	329	unassigned	unassigned	3.84375	-5.39062	3.24414	c1	1993NH	0.158	NA	NA	NA	NA	NA
A/New York/741/1994	EPI38303	EPI_ISL_5584	North America / United States / New York	Human	1994-03-03	329	unassigned	unassigned	3.84375	-5.39062	3.24414	c1	1994SH	0.0702479	NA	NA	NA	NA	NA
A/New York/750/1994	EPI38322	EPI_ISL_5585	North America / United States / New York	Human	1994-01-25	329	unassigned	unassigned	3.84375	-5.39062	3.24414	c1	1993NH	0.158	NA	NA	NA	NA	NA
A/New York/753/1994	EPI38341	EPI_ISL_5586	North America / United States / New York	Human	1994-02-15	329	unassigned	unassigned	3.36328	-5.22266	3.84961	c1	1994SH	0.735381	NA	NA	NA	NA	NA
A/New York/688/1994	EPI39061	EPI_ISL_5624	North America / United States / New York	Human	1994-12-12	329	unassigned	unassigned	3.44531	-5.39062	3.23047	c1	1994NH	1.30798	NA	NA	NA	NA	NA
A/New York/731/1994	EPI39080	EPI_ISL_5625	North America / United States / New York	Human	1994-03-09	329	unassigned	unassigned	3.84375	-5.39062	3.24414	c1	1994SH	0.0702479	NA	NA	NA	NA	NA
A/New York/742/1994	EPI39099	EPI_ISL_5626	North America / United States / New York	Human	1994-01-10	329	unassigned	unassigned	3.84375	-5.39062	3.24414	c1	1993NH	0.158	NA	NA	NA	NA	NA
A/New York/743/1994	EPI39118	EPI_ISL_5627	North America / United States / New York	Human	1994-01-07	329	unassigned	unassigned	3.84375	-5.39062	3.24414	c1	1993NH	0.158	NA	NA	NA	NA	NA
A/New York/745/1994	EPI39156	EPI_ISL_5629	North America / United States / New York	Human	1994-02-07	329	unassigned	unassigned	3.89844	-5.41406	3.22852	c1	1994SH	0.13149	NA	NA	NA	NA	NA
A/New York/744/1994	EPI39137	EPI_ISL_5628	North America / United States / New York	Human	1994-01-18	329	unassigned	unassigned	3.84375	-5.39062	3.24414	c1	1993NH	0.158	NA	NA	NA	NA	NA
A/New York/717/1994	EPI40391	EPI_ISL_5694	North America / United States / New York	Human	1994-01-19	329	unassigned	unassigned	3.84375	-5.39062	3.24414	c1	1993NH	0.158	NA	NA	NA	NA	NA
A/New York/737/1994	EPI44214	EPI_ISL_6156	North America / United States / New York	Human	1994-02-03	329	unassigned	unassigned	3.8457	-5.42969	3.17773	c1	1994SH	0.121727	NA	NA	NA	NA	NA
A/New York/704/1994	EPI48359	EPI_ISL_6447	North America / United States / New York	Human	1994-01-03	329	unassigned	unassigned	3.84375	-5.39062	3.24414	c1	1993NH	0.158	NA	NA	NA	NA	NA
A/Nanchang/0074/1994	EPI84920	EPI_ISL_8701	Asia / China	Human	1994	329	unassigned	unassigned	3.85547	-5.57031	3.1582	c1	1993NH	0.246491	NA	NA	NA	NA	NA
A/Nanchang/A2/1994	EPI91086	EPI_ISL_8988	Asia / China	Human	1994	329	unassigned	unassigned	3.85547	-5.57031	3.1582	c1	1993NH	0.246491	NA	NA	NA	NA	NA
A/Nanchang/0058/1994	EPI91105	EPI_ISL_8989	Asia / China	Human	1994	329	unassigned	unassigned	3.72656	-5.4375	3.26562	c1	1993NH	0.0377543	NA	NA	NA	NA	NA
A/Nanchang/A1/1994	EPI94620	EPI_ISL_9173	Asia / China	Human	1994	329	unassigned	unassigned	3.85547	-5.57031	3.1582	c1	1993NH	0.246491	NA	NA	NA	NA	NA
A/England/79/1994	EPI115141	EPI_ISL_11433	Europe / United Kingdom	Human	1994-12-21	329	unassigned	unassigned	4.04297	-5.29688	3.14258	c1	1994NH	1.763	NA	NA	NA	NA	NA
A/England/7/1994	EPI362723	EPI_ISL_111129	Europe / United Kingdom	Human	1994	329	unassigned	unassigned	3.68359	-5.37109	3.21289	c1	1993NH	0.101932	NA	NA	NA	NA	NA
A/Hong Kong/2/1994	EPI362735	EPI_ISL_111131	Asia / Hong Kong (SAR)	Human	1994-06-01	329	unassigned	unassigned	3.01758	-5.625	3.1582	c1	1994SH	0.807983	NA	NA	NA	NA	NA
A/Hong Kong/1/1994	EPI362728	EPI_ISL_111130	Asia / Hong Kong (SAR)	Human	1994-06-01	329	unassigned	unassigned	3.98047	-5.30469	3.20508	c1	1994SH	0.220605	NA	NA	NA	NA	NA
A/South Australia/15/1994	EPI362763	EPI_ISL_111135	Oceania / Australia	Human	1994-06-03	329	unassigned	unassigned	3.83008	-5.35156	3.33398	c1	1994SH	0.0918785	NA	NA	NA	NA	NA
A/South Australia/25/1994	EPI362770	EPI_ISL_111170	Oceania / Australia	Human	1994-06-09	329	unassigned	unassigned	3.83008	-5.35156	3.33398	c1	1994SH	0.0918785	NA	NA	NA	NA	NA
A/Tottori/872K4/1994	EPI131106	EPI_ISL_14936	Asia / Japan	Human	1994	329	unassigned	unassigned	3.73828	-5.40234	3.49805	c1	1993NH	0.212441	NA	NA	NA	NA	NA
A/Tottori/849AM2/1994	EPI131108	EPI_ISL_14937	Asia / Japan	Human	1994	329	unassigned	unassigned	3.73828	-5.63281	4.09766	c1	1993NH	0.831149	NA	NA	NA	NA	NA
A/Tottori/872AM2/1994	EPI131110	EPI_ISL_14938	Asia / Japan	Human	1994	329	unassigned	unassigned	3.53516	-5.51953	4.19922	c1	1993NH	0.926329	NA	NA	NA	NA	NA
A/Tottori/872AM4/1994	EPI131114	EPI_ISL_14940	Asia / Japan	Human	1994	329	unassigned	unassigned	3.73047	-5.54297	4.17188	c1	1993NH	0.887554	NA	NA	NA	NA	NA
A/Tottori/849AM1AL3/1994	EPI131116	EPI_ISL_14941	Asia / Japan	Human	1994	329	unassigned	unassigned	3.71289	-5.69531	4.00391	c1	1993NH	0.758881	NA	NA	NA	NA	NA
A/Tottori/872AM1AL3/1994	EPI131118	EPI_ISL_14942	Asia / Japan	Human	1994	329	unassigned	unassigned	3.73047	-5.54297	4.17188	c1	1993NH	0.887554	NA	NA	NA	NA	NA
A/Tottori/872AM2AL3/1994	EPI131122	EPI_ISL_14944	Asia / Japan	Human	1994	329	unassigned	unassigned	3.73047	-5.54297	4.17188	c1	1993NH	0.887554	NA	NA	NA	NA	NA
A/England/7/1994	EPI131566	EPI_ISL_15025	Europe / United Kingdom	Human	1994	329	unassigned	unassigned	3.68359	-5.37109	3.21289	c1	1993NH	0.101932	NA	NA	NA	NA	NA
A/England/68/1994	EPI131564	EPI_ISL_15024	Europe / United Kingdom	Human	1994	329	unassigned	unassigned	3.97266	-5.3125	3.21289	c1	1993NH	0.309204	NA	NA	NA	NA	NA
A/Hong Kong/1/1994	EPI131570	EPI_ISL_15026	Asia / Hong Kong (SAR)	Human	1994	329	unassigned	unassigned	3.98047	-5.30469	3.20508	c1	1993NH	0.321227	NA	NA	NA	NA	NA
A/Hong Kong/56/1994	EPI366888	EPI_ISL_115414	Asia / Hong Kong (SAR)	Human	1994-08-02	329	unassigned	unassigned	3.92188	-5.07031	2.92969	c1	1994SH	0.470864	NA	NA	NA	NA	NA
A/Netherlands/18/1994	EPI366897	EPI_ISL_115458	Europe / Netherlands	Human	1994-01-05	329	unassigned	unassigned	3.92578	-5.54297	3.14258	c1	1993NH	0.292148	NA	NA	NA	NA	NA
A/Johannesburg/33/1994	EPI390018	EPI_ISL_127589	Africa / South Africa	Human	1994	329	unassigned	unassigned	4.05469	-5.36328	3.08789	c1	1993NH	0.415592	NA	NA	NA	NA	NA
A/Wellington/1/1994	EPI2120638	EPI_ISL_14284913	Oceania / New Zealand / Wellington	Human	1994-02-28	329	unassigned	unassigned	3.57617	-5.30469	3.39453	c1	1994SH	0.251283	NA	NA	NA	NA	NA
A/Victoria/9/1994	EPI2120626	EPI_ISL_14284910	Oceania / Australia / Victoria / Burwood	Human	1994-06-18	329	unassigned	unassigned	3.83008	-5.35156	3.33398	c1	1994SH	0.0918785	NA	NA	NA	NA	NA
A/Brisbane/22/1994	EPI2120258	EPI_ISL_14284802	Oceania / Australia / Queensland	Human	1994-06-26	329	unassigned	unassigned	3.8457	-5.42969	3.17773	c1	1994SH	0.121727	NA	NA	NA	NA	NA
A/Perth/5/1994	EPI2120406	EPI_ISL_14284849	Oceania / Australia / Western Australia / Perth	Human	1994	329	unassigned	unassigned	3.6582	-5.57031	3.24414	c1	1993NH	0.150179	NA	NA	NA	NA	NA
A/Johannesurg/33/1994	EPI2120335	EPI_ISL_14284833	North America / United States / Georgia	Human	1994-12-16	329	unassigned	unassigned	4.04297	-5.32031	3.17969	c1	1994NH	1.7769	NA	NA	NA	NA	NA
A/Nagasaki/48/95	EPI23	EPI_ISL_12	Asia / Japan	Human	1995	329	unassigned	unassigned	1.74512	-5.67188	1.94434	c1	1994NH	0.856259	NA	NA	NA	NA	NA
A/Nagasaki/97/95	EPI29	EPI_ISL_15	Asia / Japan	Human	1995	329	unassigned	unassigned	1.73535	-5.27734	0.12854	c2	1994NH	2.36371	NA	NA	NA	NA	NA
A/Wuhan/359/95	EPI24158	EPI_ISL_758	Asia / China	Human	1995	329	unassigned	unassigned	1.84277	-5.01562	1.33984	c1	1994NH	1.30776	NA	NA	NA	NA	NA
A/Shanghai/9/95	EPI3787	EPI_ISL_763	Asia / China	Human	1995	329	unassigned	unassigned	1.60645	-5.00391	1.34863	c1	1994NH	1.43632	NA	NA	NA	NA	NA
A/Nanchang/933/95	EPI3781	EPI_ISL_760	Asia / China	Human	1995	329	unassigned	unassigned	0.728027	-5.51172	2.46094	c1	1994NH	1.75789	NA	NA	NA	NA	NA
A/Hong_Kong/3/95	EPI3841	EPI_ISL_790	Asia / Hong Kong (SAR)	Human	1995	329	unassigned	unassigned	1.73828	-5.60938	1.87402	c1	1994NH	0.890342	NA	NA	NA	NA	NA
A/Guangxi/42/95	EPI3863	EPI_ISL_801	Asia / China / Guangxi Zhuang Autonomous Region	Human	1995	329	unassigned	unassigned	1.65723	-5.67188	1.73633	c1	1994NH	1.04175	NA	NA	NA	NA	NA
A/Japan/86/95	EPI3885	EPI_ISL_811	Asia / Japan	Human	1995	329	unassigned	unassigned	3.55664	-5.47266	2.93359	c1	1994NH	1.22071	NA	NA	NA	NA	NA
A/Johannesburg/2/95	EPI3867	EPI_ISL_803	Africa / South Africa	Human	1995	329	unassigned	unassigned	1.48145	-5.88281	1.81738	c1	1994NH	1.18979	NA	NA	NA	NA	NA
A/Ohio/3/95	EPI6396	EPI_ISL_815	North America / United States / Ohio	Human	1995	329	unassigned	unassigned	1.80176	-5.64062	2.00781	c1	1994NH	0.772546	NA	NA	NA	NA	NA
A/California/5/95	EPI6392	EPI_ISL_823	North America / United States / California	Human	1995	329	unassigned	unassigned	1.6875	-5.625	2.0332	c1	1994NH	0.863306	NA	NA	NA	NA	NA
A/New_York/42/95	EPI3923	EPI_ISL_830	North America / United States / New York	Human	1995	329	unassigned	unassigned	2.96289	-6.20703	3.23828	c1	1994NH	1.20956	NA	NA	NA	NA	NA
A/Paris/83/95	EPI6204	EPI_ISL_1297	Europe / France	Human	1995	329	unassigned	unassigned	3.6582	-5.1875	3.23633	c1	1994NH	1.5084	NA	NA	NA	NA	NA
A/Nanchang/813/95	EPI6324	EPI_ISL_1356	Asia / China	Human	1995	329	unassigned	unassigned	3.01367	-5.58203	2.90625	c1	1994NH	0.76597	NA	NA	NA	NA	NA
A/Buenos Aires/4064/95	EPI11276	EPI_ISL_2381	South America / Argentina	Human	1995	329	unassigned	unassigned	1.66895	-5.67578	2.06445	c1	1994NH	0.876288	NA	NA	NA	NA	NA
A/Buenos Aires/4102/95	EPI11284	EPI_ISL_2382	South America / Argentina	Human	1995	329	unassigned	unassigned	1.71973	-5.74609	1.94727	c1	1994NH	0.891651	NA	NA	NA	NA	NA
A/Buenos Aires/4084/95	EPI11280	EPI_ISL_2384	South America / Argentina	Human	1995	329	unassigned	unassigned	1.625	-5.64453	2.04883	c1	1994NH	0.918005	NA	NA	NA	NA	NA
A/Buenos Aires/4098/95	EPI11282	EPI_ISL_2385	South America / Argentina	Human	1995	329	unassigned	unassigned	1.65527	-5.66797	2.07227	c1	1994NH	0.885236	NA	NA	NA	NA	NA
A/Buenos Aires/4065/95	EPI11278	EPI_ISL_2383	South America / Argentina	Human	1995	329	unassigned	unassigned	1.65527	-5.66797	2.07227	c1	1994NH	0.885236	NA	NA	NA	NA	NA
A/WUHAN/359/1995	EPI239314	EPI_ISL_68699	Asia / China	Human	1995-09-26	329	unassigned	unassigned	1.84277	-5.01562	1.33984	c1	1995NH	0.562063	NA	NA	NA	NA	NA
A/Netherlands/178/1995	EPI545292	EPI_ISL_167254	Europe / Netherlands	Human	1995	329	unassigned	unassigned	1.57324	-5.58594	1.98047	c1	1994NH	0.985518	NA	NA	NA	NA	NA
A/Wuhan/359/1995	EPI545300	EPI_ISL_167262	Asia / China	Human	1995	329	unassigned	unassigned	1.84277	-5.01562	1.33984	c1	1994NH	1.30776	NA	NA	NA	NA	NA
A/Nanchang/933/1995	EPI545305	EPI_ISL_167267	Asia / China	Human	1995	329	unassigned	unassigned	0.728027	-5.51172	2.46094	c1	1994NH	1.75789	NA	NA	NA	NA	NA
A/Geneva/AI9509/95	EPI24142	EPI_ISL_4377	Europe / Switzerland	Human	1995	329	unassigned	unassigned	1.73438	-5.66016	1.86816	c1	1994NH	0.902549	NA	NA	NA	NA	NA
A/Netherlands/1/95	EPI24140	EPI_ISL_4376	Europe / Netherlands	Human	1995	329	unassigned	unassigned	3.75195	-5.45703	2.91992	c1	1994NH	1.3908	NA	NA	NA	NA	NA
A/Hongkong/32/95	EPI24148	EPI_ISL_4379	Asia / Hong Kong (SAR)	Human	1995	329	unassigned	unassigned	1.62109	-5.66797	2.01562	c1	1994NH	0.936359	NA	NA	NA	NA	NA
A/Hongkong/38/95	EPI24150	EPI_ISL_4380	Asia / Hong Kong (SAR)	Human	1995	329	unassigned	unassigned	1.89355	-5.63672	1.84668	c1	1994NH	0.78595	NA	NA	NA	NA	NA
A/Hongkong/49/95	EPI24152	EPI_ISL_4381	Asia / Hong Kong (SAR)	Human	1995	329	unassigned	unassigned	1.57324	-5.58594	1.98047	c1	1994NH	0.985518	NA	NA	NA	NA	NA
A/Hongkong/55/95	EPI24156	EPI_ISL_4383	Asia / Hong Kong (SAR)	Human	1995	329	unassigned	unassigned	1.03418	-5.44531	1.86621	c1	1994NH	1.53169	NA	NA	NA	NA	NA
A/New York/606/1995	EPI32729	EPI_ISL_5293	North America / United States / New York	Human	1995-11-28	329	unassigned	unassigned	1.77637	-5.64453	2.03516	c1	1995NH	0.529272	NA	NA	NA	NA	NA
A/New York/609/1995	EPI32767	EPI_ISL_5295	North America / United States / New York	Human	1995-12-18	329	unassigned	unassigned	1.73438	-5.67578	1.94824	c1	1995NH	0.479568	NA	NA	NA	NA	NA
A/New York/612/1995	EPI32824	EPI_ISL_5298	North America / United States / New York	Human	1995-12-19	329	unassigned	unassigned	1.73438	-5.67578	1.94824	c1	1995NH	0.479568	NA	NA	NA	NA	NA
A/New York/611/1995	EPI32805	EPI_ISL_5297	North America / United States / New York	Human	1995-12-28	329	unassigned	unassigned	1.76074	-5.67969	1.9043	c1	1995NH	0.47268	NA	NA	NA	NA	NA
A/New York/610/1995	EPI32786	EPI_ISL_5296	North America / United States / New York	Human	1995-12-18	329	unassigned	unassigned	1.73438	-5.67578	1.94824	c1	1995NH	0.479568	NA	NA	NA	NA	NA
A/New York/618/1995	EPI32862	EPI_ISL_5300	North America / United States / New York	Human	1995-12-28	329	unassigned	unassigned	1.73438	-5.67578	1.94824	c1	1995NH	0.479568	NA	NA	NA	NA	NA
A/New York/628/1995	EPI32938	EPI_ISL_5304	North America / United States / New York	Human	1995-12-12	329	unassigned	unassigned	1.73438	-5.67578	1.94824	c1	1995NH	0.479568	NA	NA	NA	NA	NA
A/New York/634/1995	EPI32976	EPI_ISL_5306	North America / United States / New York	Human	1995-12-08	329	unassigned	unassigned	1.73438	-5.67578	1.94824	c1	1995NH	0.479568	NA	NA	NA	NA	NA
A/New York/648/1995	EPI33033	EPI_ISL_5309	North America / United States / New York	Human	1995-12-14	329	unassigned	unassigned	1.73438	-5.67578	1.94824	c1	1995NH	0.479568	NA	NA	NA	NA	NA
A/New York/623/1995	EPI33185	EPI_ISL_5316	North America / United States / New York	Human	1995-12-29	329	unassigned	unassigned	1.73438	-5.67578	1.94824	c1	1995NH	0.479568	NA	NA	NA	NA	NA
A/New York/695/1995	EPI34332	EPI_ISL_5377	North America / United States / New York	Human	1995-03-02	329	unassigned	unassigned	3.75195	-5.45703	2.91992	c1	1995SH	0.814451	NA	NA	NA	NA	NA
A/New York/692/1995	EPI34313	EPI_ISL_5376	North America / United States / New York	Human	1995-01-18	329	unassigned	unassigned	1.75977	-5.73828	1.66211	c1	1994NH	1.0232	NA	NA	NA	NA	NA
A/New York/698/1995	EPI34389	EPI_ISL_5380	North America / United States / New York	Human	1995-01-31	329	unassigned	unassigned	3.44727	-5.35156	3.30469	c1	1994NH	1.36472	NA	NA	NA	NA	NA
A/New York/697/1995	EPI34370	EPI_ISL_5379	North America / United States / New York	Human	1995-02-10	329	unassigned	unassigned	3.74023	-5.48828	2.92383	c1	1995SH	0.802597	NA	NA	NA	NA	NA
A/New York/703/1995	EPI34427	EPI_ISL_5382	North America / United States / New York	Human	1995-01-24	329	unassigned	unassigned	1.82324	-5.65625	1.83789	c1	1994NH	0.847933	NA	NA	NA	NA	NA
A/New York/702/1995	EPI34408	EPI_ISL_5381	North America / United States / New York	Human	1995-01-09	329	unassigned	unassigned	3.16016	-5.30859	4.07812	c1	1994NH	1.86373	NA	NA	NA	NA	NA
A/New York/658/1995	EPI34731	EPI_ISL_5397	North America / United States / New York	Human	1995-02-21	329	unassigned	unassigned	3.72852	-5.5	2.95312	c1	1995SH	0.803826	NA	NA	NA	NA	NA
A/New York/662/1995	EPI34769	EPI_ISL_5399	North America / United States / New York	Human	1995-01-09	329	unassigned	unassigned	1.73438	-5.66016	1.86816	c1	1994NH	0.902549	NA	NA	NA	NA	NA
A/New York/669/1995	EPI34807	EPI_ISL_5401	North America / United States / New York	Human	1995-01-11	329	unassigned	unassigned	3.75195	-5.45703	2.91992	c1	1994NH	1.3908	NA	NA	NA	NA	NA
A/New York/671/1995	EPI34826	EPI_ISL_5402	North America / United States / New York	Human	1995-01-06	329	unassigned	unassigned	1.73438	-5.66016	1.86816	c1	1994NH	0.902549	NA	NA	NA	NA	NA
A/New York/674/1995	EPI34864	EPI_ISL_5404	North America / United States / New York	Human	1995-01-19	329	unassigned	unassigned	1.73438	-5.66016	1.86816	c1	1994NH	0.902549	NA	NA	NA	NA	NA
A/New York/672/1995	EPI34845	EPI_ISL_5403	North America / United States / New York	Human	1995-01-17	329	unassigned	unassigned	3.72852	-5.5	2.95312	c1	1994NH	1.38175	NA	NA	NA	NA	NA
A/New York/693/1995	EPI34902	EPI_ISL_5406	North America / United States / New York	Human	1995-03-21	329	unassigned	unassigned	3.63672	-5.48828	2.91211	c1	1995SH	0.704393	NA	NA	NA	NA	NA
A/New York/679/1995	EPI34883	EPI_ISL_5405	North America / United States / New York	Human	1995-03-03	329	unassigned	unassigned	3.91992	-5.44922	3.18359	c1	1995SH	1.08765	NA	NA	NA	NA	NA
A/New York/647/1995	EPI35472	EPI_ISL_5435	North America / United States / New York	Human	1995-12-27	329	unassigned	unassigned	1.73438	-5.67578	1.94824	c1	1995NH	0.479568	NA	NA	NA	NA	NA
A/New York/684/1995	EPI35510	EPI_ISL_5437	North America / United States / New York	Human	1995-01-23	329	unassigned	unassigned	3.72852	-5.5	2.95312	c1	1994NH	1.38175	NA	NA	NA	NA	NA
A/New York/687/1995	EPI35548	EPI_ISL_5439	North America / United States / New York	Human	1995-02-06	329	unassigned	unassigned	1.73438	-5.66016	1.86816	c1	1995SH	1.47294	NA	NA	NA	NA	NA
A/New York/685/1995	EPI35529	EPI_ISL_5438	North America / United States / New York	Human	1995-02-08	329	unassigned	unassigned	3.72852	-5.5	2.95312	c1	1995SH	0.803826	NA	NA	NA	NA	NA
A/New York/689/1995	EPI35567	EPI_ISL_5440	North America / United States / New York	Human	1995-01-22	329	unassigned	unassigned	3.72852	-5.5	2.95312	c1	1994NH	1.38175	NA	NA	NA	NA	NA
A/New York/639/1995	EPI36422	EPI_ISL_5485	North America / United States / New York	Human	1995-12-18	329	unassigned	unassigned	1.91992	-5.63281	2.12109	c1	1995NH	0.655866	NA	NA	NA	NA	NA
A/New York/670/1995	EPI36460	EPI_ISL_5487	North America / United States / New York	Human	1995-01-11	329	unassigned	unassigned	3.72852	-5.5	2.95312	c1	1994NH	1.38175	NA	NA	NA	NA	NA
A/New York/682/1995	EPI36517	EPI_ISL_5490	North America / United States / New York	Human	1995-03-01	329	unassigned	unassigned	3.44727	-5.35156	3.30469	c1	1995SH	0.85539	NA	NA	NA	NA	NA
A/New York/675/1995	EPI36479	EPI_ISL_5488	North America / United States / New York	Human	1995-01-24	329	unassigned	unassigned	3.72852	-5.5	2.95312	c1	1994NH	1.38175	NA	NA	NA	NA	NA
A/New York/677/1995	EPI36498	EPI_ISL_5489	North America / United States / New York	Human	1995-02-18	329	unassigned	unassigned	3.74023	-5.48828	2.92383	c1	1995SH	0.802597	NA	NA	NA	NA	NA
A/New York/664/1995	EPI37030	EPI_ISL_5517	North America / United States / New York	Human	1995-03-13	329	unassigned	unassigned	3.61914	-5.49219	2.94141	c1	1995SH	0.702471	NA	NA	NA	NA	NA
A/New York/666/1995	EPI37049	EPI_ISL_5518	North America / United States / New York	Human	1995-02-08	329	unassigned	unassigned	3.72852	-5.5	2.95312	c1	1995SH	0.803826	NA	NA	NA	NA	NA
A/New York/667/1995	EPI37068	EPI_ISL_5519	North America / United States / New York	Human	1995-01-08	329	unassigned	unassigned	3.72852	-5.5	2.95312	c1	1994NH	1.38175	NA	NA	NA	NA	NA
A/New York/668/1995	EPI37087	EPI_ISL_5520	North America / United States / New York	Human	1995-02-18	329	unassigned	unassigned	1.73438	-5.66016	1.86816	c1	1995SH	1.47294	NA	NA	NA	NA	NA
A/New York/678/1995	EPI37106	EPI_ISL_5521	North America / United States / New York	Human	1995-01-20	329	unassigned	unassigned	1.73438	-5.66016	1.86816	c1	1994NH	0.902549	NA	NA	NA	NA	NA
A/New York/691/1995	EPI37125	EPI_ISL_5522	North America / United States / New York	Human	1995-01-03	329	unassigned	unassigned	3.72852	-5.5	2.95312	c1	1994NH	1.38175	NA	NA	NA	NA	NA
A/New York/700/1995	EPI37144	EPI_ISL_5523	North America / United States / New York	Human	1995-02-14	329	unassigned	unassigned	1.73438	-5.66016	1.86816	c1	1995SH	1.47294	NA	NA	NA	NA	NA
A/New York/673/1995	EPI38037	EPI_ISL_5570	North America / United States / New York	Human	1995-01-20	329	unassigned	unassigned	3.73242	-5.5	2.96094	c1	1994NH	1.38866	NA	NA	NA	NA	NA
A/New York/683/1995	EPI38056	EPI_ISL_5571	North America / United States / New York	Human	1995-03-03	329	unassigned	unassigned	3.44727	-5.35156	3.30469	c1	1995SH	0.85539	NA	NA	NA	NA	NA
A/New York/686/1995	EPI38075	EPI_ISL_5572	North America / United States / New York	Human	1995-02-02	329	unassigned	unassigned	3.72852	-5.5	2.95312	c1	1995SH	0.803826	NA	NA	NA	NA	NA
A/New York/690/1995	EPI38094	EPI_ISL_5573	North America / United States / New York	Human	1995-01-18	329	unassigned	unassigned	3.72852	-5.5	2.95312	c1	1994NH	1.38175	NA	NA	NA	NA	NA
A/New York/699/1995	EPI38113	EPI_ISL_5574	North America / United States / New York	Human	1995-02-07	329	unassigned	unassigned	1.75684	-5.62891	1.89355	c1	1995SH	1.43882	NA	NA	NA	NA	NA
A/New York/660/1995	EPI39023	EPI_ISL_5622	North America / United States / New York	Human	1995-03-02	329	unassigned	unassigned	1.73438	-5.66016	1.86816	c1	1995SH	1.47294	NA	NA	NA	NA	NA
A/New York/676/1995	EPI39042	EPI_ISL_5623	North America / United States / New York	Human	1995-01-18	329	unassigned	unassigned	1.75977	-5.73828	1.66211	c1	1994NH	1.0232	NA	NA	NA	NA	NA
A/New York/680/1995	EPI48302	EPI_ISL_6444	North America / United States / New York	Human	1995-02-08	329	unassigned	unassigned	3.72852	-5.5	2.95312	c1	1995SH	0.803826	NA	NA	NA	NA	NA
A/New York/681/1995	EPI48321	EPI_ISL_6445	North America / United States / New York	Human	1995-02-20	329	unassigned	unassigned	3.625	-5.48828	2.94531	c1	1995SH	0.709773	NA	NA	NA	NA	NA
A/New York/701/1995	EPI48340	EPI_ISL_6446	North America / United States / New York	Human	1995-02-23	329	unassigned	unassigned	1.74805	-5.67578	1.94922	c1	1995SH	1.42389	NA	NA	NA	NA	NA
A/Memphis/24/1995	EPI79502	EPI_ISL_8220	North America / United States / Tennessee	Human	1995	329	unassigned	unassigned	1.73438	-5.66016	1.86816	c1	1994NH	0.902549	NA	NA	NA	NA	NA
A/Netherlands/178/1995	EPI1868436	EPI_ISL_2402553	Europe / Netherlands	Human	1995-01-01	329	unassigned	unassigned	1.57324	-5.58594	1.98047	c1	1994NH	0.985518	NA	NA	NA	NA	NA
A/England/121/1995	EPI115143	EPI_ISL_11434	Europe / United Kingdom	Human	1995-02-03	329	unassigned	unassigned	4	-5.31641	3.20898	c1	1995SH	1.1868	NA	NA	NA	NA	NA
A/England/282/1995	EPI115155	EPI_ISL_11440	Europe / United Kingdom	Human	1995-04-21	329	unassigned	unassigned	3.75391	-5.67188	2.65234	c1	1995SH	0.756757	NA	NA	NA	NA	NA
A/Hong Kong/55/1995	EPI362788	EPI_ISL_111173	Asia / Hong Kong (SAR)	Human	1995-10-12	329	unassigned	unassigned	1.03418	-5.44531	1.86621	c1	1995NH	0.541071	NA	NA	NA	NA	NA
A/Nanchang/933/1995	EPI362794	EPI_ISL_111174	Asia / China	Human	1995	329	unassigned	unassigned	1.17969	-5.47656	1.7793	c1	1994NH	1.42618	NA	NA	NA	NA	NA
A/Netherlands/271/1995	EPI362801	EPI_ISL_111181	Europe / Netherlands	Human	1995-12-02	329	unassigned	unassigned	1.3457	-5.53906	1.91992	c1	1995NH	0.364317	NA	NA	NA	NA	NA
A/Victoria/75/1995	EPI362814	EPI_ISL_111220	Oceania / Australia / Victoria	Human	1995-07-27	329	unassigned	unassigned	1.73438	-5.67578	1.94824	c1	1995SH	1.43646	NA	NA	NA	NA	NA
A/Nanchang/933/1995	EPI3460484	EPI_ISL_19284879	Asia / China	Human	1995-12-31	329	unassigned	unassigned	1.17969	-5.47656	1.7793	c1	1995NH	0.39326	NA	NA	NA	NA	NA
A/Finland/338/1995	EPI366905	EPI_ISL_115459	Europe / Finland	Human	1995	329	unassigned	unassigned	1.68945	-5.58594	1.82324	c1	1994NH	0.957243	NA	NA	NA	NA	NA
A/Finland/381/1995	EPI366921	EPI_ISL_115461	Europe / Finland	Human	1995	329	unassigned	unassigned	1.67188	-5.58594	1.91406	c1	1994NH	0.925156	NA	NA	NA	NA	NA
A/Finland/339/1995	EPI366913	EPI_ISL_115460	Europe / Finland	Human	1995	329	unassigned	unassigned	1.67188	-5.58594	1.91406	c1	1994NH	0.925156	NA	NA	NA	NA	NA
A/Hong Kong/3/1995	EPI366937	EPI_ISL_115463	Asia / Hong Kong (SAR)	Human	1995-01-24	329	unassigned	unassigned	1.78809	-5.67969	1.81934	c1	1994NH	0.890236	NA	NA	NA	NA	NA
A/Geneva/A9509/1995	EPI366929	EPI_ISL_115462	Europe / Switzerland	Human	1995-02-01	329	unassigned	unassigned	1.8623	-5.78516	1.77734	c1	1995SH	1.42982	NA	NA	NA	NA	NA
A/Lyon/2279/1995	EPI366953	EPI_ISL_115511	Europe / France	Human	1995-11-20	329	unassigned	unassigned	1.67188	-5.58594	1.91406	c1	1995NH	0.370501	NA	NA	NA	NA	NA
A/Hong Kong/49/1995	EPI366945	EPI_ISL_115510	Asia / Hong Kong (SAR)	Human	1995-09-01	329	unassigned	unassigned	1.57324	-5.58594	1.98047	c1	1995NH	0.391692	NA	NA	NA	NA	NA
A/Netherlands/1/1995	EPI366961	EPI_ISL_115512	Europe / Netherlands	Human	1995-01-11	329	unassigned	unassigned	3.75195	-5.45703	2.91992	c1	1994NH	1.3908	NA	NA	NA	NA	NA
A/Malaysia/07831/1995	EPI373087	EPI_ISL_120335	Asia / Malaysia	Human	1995-09-27	329	unassigned	unassigned	1.12109	-5.46875	1.82617	c1	1995NH	0.455564	NA	NA	NA	NA	NA
A/Malaysia/07145/1995	EPI373079	EPI_ISL_120334	Asia / Malaysia	Human	1995-07-03	329	unassigned	unassigned	1.8916	-5.65625	1.84961	c1	1995SH	1.3489	NA	NA	NA	NA	NA
A/Malaysia/07832/1995	EPI373095	EPI_ISL_120336	Asia / Malaysia	Human	1995-09-27	329	unassigned	unassigned	1.0166	-5.45703	1.34766	c1	1995NH	0.632917	NA	NA	NA	NA	NA
A/South Australia/1/1995	EPI2120456	EPI_ISL_14284858	Oceania / Australia / South Australia / Adelaide	Human	1995	329	unassigned	unassigned	1.83887	-5.625	2.20312	c1	1994NH	0.668217	NA	NA	NA	NA	NA
A/Wuhan/359/1995	EPI397298	EPI_ISL_129599	Asia / China	Human	1995	329	unassigned	unassigned	1.84277	-5.01562	1.33984	c1	1994NH	1.30776	NA	NA	NA	NA	NA
A/Guangzhou/8/96	EPI3751	EPI_ISL_747	Asia / China / Guangdong Province / Guangzhou	Human	1996	329	unassigned	unassigned	1.3252	-5.08203	1.90039	c1	1995NH	0.381889	NA	NA	NA	NA	NA
A/Chile/2115/96	EPI3747	EPI_ISL_745	South America / Chile	Human	1996	329	unassigned	unassigned	1.7168	-5.00391	1.25	c1	1995NH	0.576186	NA	NA	NA	NA	NA
A/Guangzhou/6/96	EPI3745	EPI_ISL_744	Asia / China / Guangdong Province / Guangzhou	Human	1996	329	unassigned	unassigned	0.737793	-5.05078	1.68359	c1	1995NH	0.840231	NA	NA	NA	NA	NA
A/Guangzhou/11/96	EPI3749	EPI_ISL_746	Asia / China / Guangdong Province / Guangzhou	Human	1996	329	unassigned	unassigned	1.7168	-5.00391	1.25	c1	1995NH	0.576186	NA	NA	NA	NA	NA
A/Hong_Kong/357/96	EPI3753	EPI_ISL_748	Asia / Hong Kong (SAR)	Human	1996	329	unassigned	unassigned	1.74219	-4.99609	1.32617	c1	1995NH	0.534554	NA	NA	NA	NA	NA
A/Brisbane/22/96	EPI3771	EPI_ISL_756	Oceania / Australia / Queensland	Human	1996	329	unassigned	unassigned	1.19336	-5.49609	1.72461	c1	1995NH	0.380549	NA	NA	NA	NA	NA
A/Fukushima/114/96	EPI3757	EPI_ISL_749	Asia / Japan	Human	1996	329	unassigned	unassigned	0.812012	-5.49219	2.63281	c1	1995NH	1.19714	NA	NA	NA	NA	NA
A/Brisbane/35/96	EPI3763	EPI_ISL_752	Oceania / Australia / Queensland	Human	1996	329	unassigned	unassigned	1.14453	-5.48047	1.75879	c1	1995NH	0.422658	NA	NA	NA	NA	NA
A/CNIC/35/96	EPI3773	EPI_ISL_757	Asia / China	Human	1996	329	unassigned	unassigned	1.12109	-5.46875	1.82617	c1	1995NH	0.455564	NA	NA	NA	NA	NA
A/Washington/5/96	EPI3789	EPI_ISL_764	North America / United States / Washington	Human	1996	329	unassigned	unassigned	1.37695	-5.42969	1.94922	c1	1995NH	0.318722	NA	NA	NA	NA	NA
A/New_York/28/96	EPI3871	EPI_ISL_805	North America / United States / New York	Human	1996	329	unassigned	unassigned	3.08008	-5.19531	2.9043	c1	1995NH	1.97139	NA	NA	NA	NA	NA
A/Hong_Kong/42/96	EPI3869	EPI_ISL_804	Asia / Hong Kong (SAR)	Human	1996	329	unassigned	unassigned	3.08008	-5.19531	2.9043	c1	1995NH	1.97139	NA	NA	NA	NA	NA
A/Vienna/47/96	EPI4158	EPI_ISL_945	Europe / Austria	Human	1996	329	unassigned	unassigned	1.73438	-5.67578	1.94824	c1	1995NH	0.479568	NA	NA	NA	NA	NA
A/Netherlands/172/96	EPI4943	EPI_ISL_1143	Europe / Netherlands	Human	1996	329	unassigned	unassigned	0.755371	-4.55078	2.5918	c1	1995NH	1.41937	NA	NA	NA	NA	NA
A/Hong Kong/434/96	EPI6208	EPI_ISL_1299	Asia / Hong Kong (SAR)	Human	1996	329	unassigned	unassigned	4.04297	-5.32031	3.17969	c1	1995NH	2.91931	NA	NA	NA	NA	NA
A/Beijing/244/96	EPI6240	EPI_ISL_1315	Asia / China	Human	1996	329	unassigned	unassigned	1.47461	-4.90234	1.20508	c1	1995NH	0.646768	NA	NA	NA	NA	NA
A/Harbin/3/96	EPI6238	EPI_ISL_1314	Asia / China	Human	1996	329	unassigned	unassigned	1.66992	-4.98047	1.22363	c1	1995NH	0.597004	NA	NA	NA	NA	NA
A/Trinidad/47/96	EPI6242	EPI_ISL_1316	North America / Trinidad and Tobago	Human	1996	329	unassigned	unassigned	2.05273	-4.96484	0.92627	c1	1995NH	0.99299	NA	NA	NA	NA	NA
A/Guanxi/189/96	EPI6244	EPI_ISL_1317	Asia / China	Human	1996	329	unassigned	unassigned	2.06055	-4.96094	0.896973	c1	1995NH	1.02114	NA	NA	NA	NA	NA
A/Argentina/601/96	EPI6248	EPI_ISL_1319	South America / Argentina	Human	1996	329	unassigned	unassigned	2.01172	-5.17969	1.30371	c1	1995NH	0.633602	NA	NA	NA	NA	NA
A/Argentina/207/96	EPI6250	EPI_ISL_1320	South America / Argentina	Human	1996	329	unassigned	unassigned	1.80078	-5.19531	1.22266	c1	1995NH	0.555443	NA	NA	NA	NA	NA
A/Cordoba/3278/96	EPI6246	EPI_ISL_1318	Europe / Spain	Human	1996	329	unassigned	unassigned	1.78711	-4.79297	1.21094	c1	1995NH	0.760961	NA	NA	NA	NA	NA
A/Trinidad/50/96	EPI6254	EPI_ISL_1322	North America / Trinidad and Tobago	Human	1996	329	unassigned	unassigned	1.7373	-4.94141	1.35449	c1	1995NH	0.550342	NA	NA	NA	NA	NA
A/Trinidad/51/96	EPI6252	EPI_ISL_1321	North America / Trinidad and Tobago	Human	1996	329	unassigned	unassigned	1.85938	-4.76172	1.18848	c1	1995NH	0.823105	NA	NA	NA	NA	NA
A/Texas/11/96	EPI6300	EPI_ISL_1323	North America / United States / Texas	Human	1996	329	unassigned	unassigned	0.763184	-5.19141	1.64551	c1	1995NH	0.781564	NA	NA	NA	NA	NA
A/Colombia/170/96	EPI6266	EPI_ISL_1328	South America / Colombia	Human	1996	329	unassigned	unassigned	1.85156	-4.55078	-0.53125	c2	1995NH	2.37492	NA	NA	NA	NA	NA
A/Hong Kong/358/96	EPI6272	EPI_ISL_1331	Asia / Hong Kong (SAR)	Human	1996	329	unassigned	unassigned	1.22754	-5.26172	1.48828	c1	1995NH	0.371087	NA	NA	NA	NA	NA
A/Tianjing/55/96	EPI6276	EPI_ISL_1333	Asia / China	Human	1996	329	unassigned	unassigned	1.7168	-5.00391	1.25	c1	1995NH	0.576186	NA	NA	NA	NA	NA
A/Shangdong/9/96	EPI6268	EPI_ISL_1329	Asia / China	Human	1996	329	unassigned	unassigned	2.22852	-4.52344	0.775391	c1	1995NH	1.40241	NA	NA	NA	NA	NA
A/Fujian/133/96	EPI6274	EPI_ISL_1332	Asia / China / Fujian Province	Human	1996	329	unassigned	unassigned	1.94434	-4.85156	1.07812	c1	1995NH	0.87762	NA	NA	NA	NA	NA
A/Argentina/39/96	EPI6280	EPI_ISL_1335	South America / Argentina	Human	1996	329	unassigned	unassigned	1.7168	-5.00391	1.25	c1	1995NH	0.576186	NA	NA	NA	NA	NA
A/Shenzhen/157/96	EPI6282	EPI_ISL_1336	Asia / China	Human	1996	329	unassigned	unassigned	1.94043	-4.94141	0.960449	c1	1995NH	0.920865	NA	NA	NA	NA	NA
A/Saitama/80/96	EPI6288	EPI_ISL_1339	Asia / Japan / Saitama	Human	1996	329	unassigned	unassigned	1.55469	-4.94922	1.36719	c1	1995NH	0.496848	NA	NA	NA	NA	NA
A/New York/55/96	EPI6292	EPI_ISL_1341	North America / United States / New York	Human	1996	329	unassigned	unassigned	0.600098	-4.35938	2.50586	c1	1995NH	1.57022	NA	NA	NA	NA	NA
A/Guangdong/1/96	EPI6306	EPI_ISL_1347	Asia / China / Guangdong Province	Human	1996	329	unassigned	unassigned	0.737793	-5.05078	1.68359	c1	1995NH	0.840231	NA	NA	NA	NA	NA
A/Caracas/465/96	EPI6316	EPI_ISL_1352	South America / Venezuela, Bolivarian Republic of	Human	1996	329	unassigned	unassigned	1.19336	-5.49609	1.72461	c1	1995NH	0.380549	NA	NA	NA	NA	NA
A/Johannesburg/53/96	EPI6398	EPI_ISL_1391	Africa / South Africa	Human	1996	329	unassigned	unassigned	1.97559	-5.71094	1.30859	c1	1995NH	0.701195	NA	NA	NA	NA	NA
A/South Africa/D1147/96	EPI347452	EPI_ISL_100416	Africa / South Africa	Human	1996	329	unassigned	unassigned	1.7168	-5.00391	1.25	c1	1995NH	0.576186	NA	NA	NA	NA	NA
A/Saudi Arabia/24/96	EPI347456	EPI_ISL_100420	Asia / Saudi Arabia	Human	1996	329	unassigned	unassigned	1.22266	-5.44922	1.6875	c1	1995NH	0.333043	NA	NA	NA	NA	NA
A/Wellington/48/1996	EPI545294	EPI_ISL_167256	Oceania / New Zealand	Human	1996	329	unassigned	unassigned	1.14941	-5.48438	1.73535	c1	1995NH	0.416503	NA	NA	NA	NA	NA
A/Christchurch/1/1996	EPI545304	EPI_ISL_167266	Oceania / New Zealand	Human	1996	329	unassigned	unassigned	1.14941	-5.48438	1.73535	c1	1995NH	0.416503	NA	NA	NA	NA	NA
A/Canberra/1/1996	EPI545302	EPI_ISL_167264	Oceania / Australia	Human	1996	329	unassigned	unassigned	0.754883	-5.58984	2.35547	c1	1995NH	1.05603	NA	NA	NA	NA	NA
A/Hongkong/20/96	EPI24164	EPI_ISL_4386	Asia / Hong Kong (SAR)	Human	1996	329	unassigned	unassigned	0.900879	-5.12891	1.74316	c1	1995NH	0.662917	NA	NA	NA	NA	NA
A/Geneva/3958/96	EPI24168	EPI_ISL_4388	Europe / Switzerland	Human	1996	329	unassigned	unassigned	1.12109	-5.46875	1.82617	c1	1995NH	0.455564	NA	NA	NA	NA	NA
A/Brisbane/8/96	EPI24172	EPI_ISL_4390	Oceania / Australia / Queensland	Human	1996	329	unassigned	unassigned	0.874023	-5.3125	1.75586	c1	1995NH	0.661132	NA	NA	NA	NA	NA
A/Singapore/1/96	EPI24178	EPI_ISL_4391	Asia / Singapore	Human	1996	329	unassigned	unassigned	1.08984	-5.34375	1.81152	c1	1995NH	0.458516	NA	NA	NA	NA	NA
A/New York/573/1996	EPI30070	EPI_ISL_5155	North America / United States / New York	Human	1996-12-23	329	unassigned	unassigned	1.71094	-5.02734	1.28125	c1	1996NH	0.743454	NA	NA	NA	NA	NA
A/New York/570/1996	EPI30051	EPI_ISL_5154	North America / United States / New York	Human	1996-12-12	329	unassigned	unassigned	0.600098	-4.35938	2.50586	c1	1996NH	2.13944	NA	NA	NA	NA	NA
A/New York/568/1996	EPI30449	EPI_ISL_5175	North America / United States / New York	Human	1996-12-11	329	unassigned	unassigned	0.600098	-4.35938	2.50586	c1	1996NH	2.13944	NA	NA	NA	NA	NA
A/New York/586/1996	EPI30563	EPI_ISL_5181	North America / United States / New York	Human	1996-12-21	329	unassigned	unassigned	1.75781	-4.98438	1.24414	c1	1996NH	0.705009	NA	NA	NA	NA	NA
A/New York/593/1996	EPI31038	EPI_ISL_5205	North America / United States / New York	Human	1996-12-09	329	unassigned	unassigned	1.06641	-5.41406	1.84961	c1	1996NH	1.4931	NA	NA	NA	NA	NA
A/New York/589/1996	EPI30620	EPI_ISL_5184	North America / United States / New York	Human	1996-12-18	329	unassigned	unassigned	1.82422	-5.01172	1.19727	c1	1996NH	0.698517	NA	NA	NA	NA	NA
A/New York/584/1996	EPI31019	EPI_ISL_5204	North America / United States / New York	Human	1996-12-31	329	unassigned	unassigned	1.14941	-5.48438	1.73535	c1	1996NH	1.41122	NA	NA	NA	NA	NA
A/New York/588/1996	EPI30601	EPI_ISL_5183	North America / United States / New York	Human	1996-12-28	329	unassigned	unassigned	1.75781	-4.98438	1.24414	c1	1996NH	0.705009	NA	NA	NA	NA	NA
A/New York/562/1996	EPI31247	EPI_ISL_5216	North America / United States / New York	Human	1996-12-13	329	unassigned	unassigned	1.14941	-5.48438	1.73535	c1	1996NH	1.41122	NA	NA	NA	NA	NA
A/New York/563/1996	EPI31266	EPI_ISL_5217	North America / United States / New York	Human	1996-11-12	329	unassigned	unassigned	1.66406	-4.94531	1.34961	c1	1996NH	0.768196	NA	NA	NA	NA	NA
A/New York/567/1996	EPI31285	EPI_ISL_5218	North America / United States / New York	Human	1996-12-05	329	unassigned	unassigned	1.31348	-5.28125	1.53223	c1	1996NH	1.09706	NA	NA	NA	NA	NA
A/New York/582/1996	EPI31304	EPI_ISL_5219	North America / United States / New York	Human	1996-12-02	329	unassigned	unassigned	0.660645	-5.17578	1.55664	c1	1996NH	1.37218	NA	NA	NA	NA	NA
A/New York/595/1996	EPI31380	EPI_ISL_5223	North America / United States / New York	Human	1996-12-18	329	unassigned	unassigned	0.600098	-4.35938	2.50586	c1	1996NH	2.13944	NA	NA	NA	NA	NA
A/New York/596/1996	EPI31399	EPI_ISL_5224	North America / United States / New York	Human	1996-12-12	329	unassigned	unassigned	0.695801	-5.17578	1.66992	c1	1996NH	1.43005	NA	NA	NA	NA	NA
A/New York/591/1996	EPI31323	EPI_ISL_5220	North America / United States / New York	Human	1996-12-20	329	unassigned	unassigned	1.7959	-5.00391	1.20312	c1	1996NH	0.689703	NA	NA	NA	NA	NA
A/New York/617/1996	EPI32482	EPI_ISL_5280	North America / United States / New York	Human	1996-03-19	329	unassigned	unassigned	1.12109	-5.46875	1.82617	c1	1996SH	0.346681	NA	NA	NA	NA	NA
A/New York/578/1996	EPI32672	EPI_ISL_5290	North America / United States / New York	Human	1996-12-27	329	unassigned	unassigned	1.75781	-4.98438	1.24414	c1	1996NH	0.705009	NA	NA	NA	NA	NA
A/New York/561/1996	EPI32691	EPI_ISL_5291	North America / United States / New York	Human	1996-12-22	329	unassigned	unassigned	0.71582	-4.43359	2.5918	c1	1996NH	2.15704	NA	NA	NA	NA	NA
A/New York/603/1996	EPI32710	EPI_ISL_5292	North America / United States / New York	Human	1996-12-09	329	unassigned	unassigned	1.81152	-5.04297	1.13965	c1	1996NH	0.661996	NA	NA	NA	NA	NA
A/New York/608/1996	EPI32748	EPI_ISL_5294	North America / United States / New York	Human	1996-04-01	329	unassigned	unassigned	1.12305	-5.46875	1.83301	c1	1996SH	0.348526	NA	NA	NA	NA	NA
A/New York/613/1996	EPI32843	EPI_ISL_5299	North America / United States / New York	Human	1996-01-10	329	unassigned	unassigned	1.73438	-5.67578	1.94824	c1	1995NH	0.479568	NA	NA	NA	NA	NA
A/New York/622/1996	EPI32900	EPI_ISL_5302	North America / United States / New York	Human	1996-01-08	329	unassigned	unassigned	1.73438	-5.67578	1.94824	c1	1995NH	0.479568	NA	NA	NA	NA	NA
A/New York/619/1996	EPI32881	EPI_ISL_5301	North America / United States / New York	Human	1996-01-10	329	unassigned	unassigned	1.77637	-5.64453	2.03516	c1	1995NH	0.529272	NA	NA	NA	NA	NA
A/New York/631/1996	EPI32957	EPI_ISL_5305	North America / United States / New York	Human	1996-04-04	329	unassigned	unassigned	1.12109	-5.46875	1.82617	c1	1996SH	0.346681	NA	NA	NA	NA	NA
A/New York/637/1996	EPI32995	EPI_ISL_5307	North America / United States / New York	Human	1996-01-17	329	unassigned	unassigned	1.92773	-5.75	2	c1	1995NH	0.657671	NA	NA	NA	NA	NA
A/New York/555/1996	EPI33147	EPI_ISL_5314	North America / United States / New York	Human	1996-12-23	329	unassigned	unassigned	1.71094	-5.02734	1.28125	c1	1996NH	0.743454	NA	NA	NA	NA	NA
A/New York/602/1996	EPI33895	EPI_ISL_5354	North America / United States / New York	Human	1996-12-23	329	unassigned	unassigned	1.75781	-4.98438	1.24414	c1	1996NH	0.705009	NA	NA	NA	NA	NA
A/New York/557/1996	EPI34161	EPI_ISL_5368	North America / United States / New York	Human	1996-11-21	329	unassigned	unassigned	1.75781	-4.98438	1.24414	c1	1996NH	0.705009	NA	NA	NA	NA	NA
A/New York/559/1996	EPI34180	EPI_ISL_5369	North America / United States / New York	Human	1996-11-25	329	unassigned	unassigned	0.879883	-4.30469	2.35938	c1	1996NH	1.90598	NA	NA	NA	NA	NA
A/New York/571/1996	EPI34541	EPI_ISL_5388	North America / United States / New York	Human	1996-12-18	329	unassigned	unassigned	0.741211	-5.18359	1.65332	c1	1996NH	1.39349	NA	NA	NA	NA	NA
A/New York/577/1996	EPI34560	EPI_ISL_5389	North America / United States / New York	Human	1996-12-24	329	unassigned	unassigned	1.75781	-4.98438	1.24414	c1	1996NH	0.705009	NA	NA	NA	NA	NA
A/New York/636/1996	EPI34636	EPI_ISL_5393	North America / United States / New York	Human	1996-01-22	329	unassigned	unassigned	1.81055	-5.76172	1.82715	c1	1995NH	0.535331	NA	NA	NA	NA	NA
A/New York/641/1996	EPI34655	EPI_ISL_5394	North America / United States / New York	Human	1996-01-03	329	unassigned	unassigned	1.83594	-5.55078	1.875	c1	1995NH	0.420894	NA	NA	NA	NA	NA
A/New York/635/1996	EPI34617	EPI_ISL_5392	North America / United States / New York	Human	1996-01-18	329	unassigned	unassigned	1.75684	-5.64844	1.92188	c1	1995NH	0.456401	NA	NA	NA	NA	NA
A/New York/652/1996	EPI35491	EPI_ISL_5436	North America / United States / New York	Human	1996-04-01	329	unassigned	unassigned	1.06836	-5.36719	1.97949	c1	1996SH	0.405254	NA	NA	NA	NA	NA
A/New York/556/1996	EPI36384	EPI_ISL_5483	North America / United States / New York	Human	1996-11-19	329	unassigned	unassigned	1.71094	-5.02734	1.28125	c1	1996NH	0.743454	NA	NA	NA	NA	NA
A/New York/598/1996	EPI36403	EPI_ISL_5484	North America / United States / New York	Human	1996-12-17	329	unassigned	unassigned	1.75781	-4.98438	1.24414	c1	1996NH	0.705009	NA	NA	NA	NA	NA
A/New York/554/1996	EPI37923	EPI_ISL_5564	North America / United States / New York	Human	1996-11-12	329	unassigned	unassigned	1.75781	-4.98438	1.24414	c1	1996NH	0.705009	NA	NA	NA	NA	NA
A/New York/601/1996	EPI44157	EPI_ISL_6153	North America / United States / New York	Human	1996-12-09	329	unassigned	unassigned	0.600098	-4.35938	2.50586	c1	1996NH	2.13944	NA	NA	NA	NA	NA
A/Chile/JM-SO389/1996	EPI1776596	EPI_ISL_503061	South America / Chile	Human	1996	329	unassigned	unassigned	1.4541	-5.05859	-0.118958	c2	1995NH	1.83107	NA	NA	NA	NA	NA
A/Chile/JM-F2047-1/1996	EPI1776643	EPI_ISL_503068	South America / Chile	Human	1996	329	unassigned	unassigned	1.12109	-5.46875	1.82617	c1	1995NH	0.455564	NA	NA	NA	NA	NA
A/Chile/JM-OT583-2/1996	EPI1776584	EPI_ISL_503059	South America / Chile	Human	1996	329	unassigned	unassigned	1.12109	-5.46875	1.82617	c1	1995NH	0.455564	NA	NA	NA	NA	NA
A/Chile/JM-SO383/1996	EPI1776633	EPI_ISL_503066	South America / Chile	Human	1996	329	unassigned	unassigned	1.12109	-5.46875	1.82617	c1	1995NH	0.455564	NA	NA	NA	NA	NA
A/Chile/JM-SO393/1996	EPI1776691	EPI_ISL_503076	South America / Chile	Human	1996	329	unassigned	unassigned	1.12109	-5.46875	1.82617	c1	1995NH	0.455564	NA	NA	NA	NA	NA
A/Chile/JM-F2106/1996	EPI1776747	EPI_ISL_503083	South America / Chile	Human	1996	329	unassigned	unassigned	1.12109	-5.46875	1.82617	c1	1995NH	0.455564	NA	NA	NA	NA	NA
A/Chile/JM-R3849/1996	EPI1776890	EPI_ISL_503099	South America / Chile	Human	1996	329	unassigned	unassigned	1.12109	-5.46875	1.82617	c1	1995NH	0.455564	NA	NA	NA	NA	NA
A/Chile/JM-OT583-1/1996	EPI1776869	EPI_ISL_503097	South America / Chile	Human	1996	329	unassigned	unassigned	1.22949	-5.44531	1.74414	c1	1995NH	0.32956	NA	NA	NA	NA	NA
A/Chile/JM-SO359/1996	EPI1776935	EPI_ISL_503105	South America / Chile	Human	1996	329	unassigned	unassigned	1.12109	-5.46875	1.82617	c1	1995NH	0.455564	NA	NA	NA	NA	NA
A/Chile/JM-F2047-2/1996	EPI1776926	EPI_ISL_503104	South America / Chile	Human	1996	329	unassigned	unassigned	1.60547	-5.48438	1.63965	c1	1995NH	0.1825	NA	NA	NA	NA	NA
A/Singapore/1/1996	EPI362827	EPI_ISL_111270	Asia / Singapore	Human	1996-02-12	329	unassigned	unassigned	1.04883	-5.33984	1.82715	c1	1996SH	0.314879	NA	NA	NA	NA	NA
A/Nice/491/1997	EPI362882	EPI_ISL_111339	Europe / France	Human	1996-12-30	329	unassigned	unassigned	1.2168	-5.47266	1.75879	c1	1996NH	1.40568	NA	NA	NA	NA	NA
A/Auckland/5/1996	EPI585673	EPI_ISL_177745	Oceania / New Zealand	Human	1996	329	unassigned	unassigned	1.14941	-5.48438	1.73535	c1	1995NH	0.416503	NA	NA	NA	NA	NA
A/Auckland/19/1996	EPI585674	EPI_ISL_177746	Oceania / New Zealand	Human	1996	329	unassigned	unassigned	1.04102	-5.44141	1.86621	c1	1995NH	0.533928	NA	NA	NA	NA	NA
A/Auckland/19/1996	EPI585675	EPI_ISL_177747	Oceania / New Zealand	Human	1996	329	unassigned	unassigned	1.25	-5.51172	1.85449	c1	1995NH	0.37535	NA	NA	NA	NA	NA
A/Auckland/5/1996	EPI585672	EPI_ISL_177744	Oceania / New Zealand	Human	1996	329	unassigned	unassigned	1.875	-5.02344	1.25781	c1	1995NH	0.629712	NA	NA	NA	NA	NA
A/Oklahoma/3003/1996	EPI283582	EPI_ISL_80372	North America / United States	Human	1996	329	unassigned	unassigned	1.41309	-5.07031	1.48633	c1	1995NH	0.347911	NA	NA	NA	NA	NA
A/Brisbane/8/1996	EPI3460490	EPI_ISL_19284880	Oceania / Australia	Human	1996-12-31	329	unassigned	unassigned	1.14941	-5.48438	1.73535	c1	1996NH	1.41122	NA	NA	NA	NA	NA
A/Geneva/3958/1996	EPI366969	EPI_ISL_115513	Europe / Switzerland	Human	1996	329	unassigned	unassigned	1.12109	-5.46875	1.82617	c1	1995NH	0.455564	NA	NA	NA	NA	NA
A/Hong Kong/42/1996	EPI366985	EPI_ISL_115515	Asia / Hong Kong (SAR)	Human	1996-03-04	329	unassigned	unassigned	2.96289	-5.08594	2.94727	c1	1996SH	2.09398	NA	NA	NA	NA	NA
A/Hong Kong/20/1996	EPI366977	EPI_ISL_115514	Asia / Hong Kong (SAR)	Human	1996-02-24	329	unassigned	unassigned	0.900879	-5.12891	1.74316	c1	1996SH	0.40549	NA	NA	NA	NA	NA
A/Hong Kong/358/1996	EPI367001	EPI_ISL_115564	Asia / Hong Kong (SAR)	Human	1996-07-19	329	unassigned	unassigned	1.22754	-5.26172	1.48828	c1	1996SH	0.217158	NA	NA	NA	NA	NA
A/Hong Kong/357/1996	EPI366993	EPI_ISL_115563	Asia / Hong Kong (SAR)	Human	1996-07-19	329	unassigned	unassigned	1.74219	-4.99609	1.32617	c1	1996SH	0.610282	NA	NA	NA	NA	NA
A/Hong Kong/434/1996	EPI367009	EPI_ISL_115565	Asia / Hong Kong (SAR)	Human	1996-10-02	329	unassigned	unassigned	4.04297	-5.32031	3.17969	c1	1996NH	3.61639	NA	NA	NA	NA	NA
A/Netherlands/91/1996	EPI367025	EPI_ISL_115567	Europe / Netherlands	Human	1996-01-30	329	unassigned	unassigned	1.76074	-5.67969	1.9043	c1	1995NH	0.47268	NA	NA	NA	NA	NA
A/Brisbane/8/1996	EPI367206	EPI_ISL_115771	Oceania / Australia	Human	1996	329	unassigned	unassigned	1.14941	-5.48438	1.73535	c1	1995NH	0.416503	NA	NA	NA	NA	NA
A/Malaysia/10081/1996	EPI371719	EPI_ISL_119634	Asia / Malaysia	Human	1996-05-24	329	unassigned	unassigned	1.18066	-5.47266	1.78223	c1	1996SH	0.307731	NA	NA	NA	NA	NA
A/Malaysia/10675/1996	EPI371733	EPI_ISL_119673	Asia / Malaysia	Human	1996-08-26	329	unassigned	unassigned	1.37305	-3.97266	-2.05859	c2	1996SH	3.94277	NA	NA	NA	NA	NA
A/Malaysia/10135/1996	EPI371726	EPI_ISL_119672	Asia / Malaysia	Human	1996-05-30	329	unassigned	unassigned	1.19141	-5.46094	1.82324	c1	1996SH	0.309416	NA	NA	NA	NA	NA
A/Malaysia/10970/1996	EPI371750	EPI_ISL_119702	Asia / Malaysia	Human	1996-10-14	329	unassigned	unassigned	0.896973	-4.11719	-2.14648	c2	1996NH	2.91068	NA	NA	NA	NA	NA
A/Malaysia/10879/1996	EPI371743	EPI_ISL_119701	Asia / Malaysia	Human	1996-09-25	329	unassigned	unassigned	1.37305	-3.97266	-2.05859	c2	1996NH	2.79018	NA	NA	NA	NA	NA
A/Malaysia/10816/1996	EPI371737	EPI_ISL_119700	Asia / Malaysia	Human	1996-09-16	329	unassigned	unassigned	0.881836	-4.06641	-2.24219	c2	1996NH	3.01581	NA	NA	NA	NA	NA
A/Malaysia/10111/1996	EPI373103	EPI_ISL_120337	Asia / Malaysia	Human	1996-06-19	329	unassigned	unassigned	1.18066	-5.47266	1.78223	c1	1996SH	0.307731	NA	NA	NA	NA	NA
A/Malaysia/10717/1996	EPI373135	EPI_ISL_120341	Asia / Malaysia	Human	1996-09-02	329	unassigned	unassigned	0.930664	-4.11719	-2.20898	c2	1996NH	2.96296	NA	NA	NA	NA	NA
A/Malaysia/10360/1996	EPI373111	EPI_ISL_120338	Asia / Malaysia	Human	1996-07-02	329	unassigned	unassigned	1.7168	-5.00391	1.25	c1	1996SH	0.638649	NA	NA	NA	NA	NA
A/Malaysia/10370/1996	EPI373119	EPI_ISL_120339	Asia / Malaysia	Human	1996-07-03	329	unassigned	unassigned	1.12109	-5.46875	1.82617	c1	1996SH	0.346681	NA	NA	NA	NA	NA
A/Malaysia/10807/1996	EPI373127	EPI_ISL_120340	Asia / Malaysia	Human	1996-09-13	329	unassigned	unassigned	1.37305	-3.97266	-2.05859	c2	1996NH	2.79018	NA	NA	NA	NA	NA
A/Malaysia/10969/1996	EPI373151	EPI_ISL_120343	Asia / Malaysia	Human	1996-10-14	329	unassigned	unassigned	0.930664	-4.11719	-2.20898	c2	1996NH	2.96296	NA	NA	NA	NA	NA
A/Malaysia/10877/1996	EPI373143	EPI_ISL_120342	Asia / Malaysia	Human	1996-09-25	329	unassigned	unassigned	1.84277	-4.27734	-0.822754	c2	1996NH	1.53917	NA	NA	NA	NA	NA
A/Malaysia/10997/1996	EPI373159	EPI_ISL_120344	Asia / Malaysia	Human	1996-10-18	329	unassigned	unassigned	1.68848	-4.35938	-1.06055	c2	1996NH	1.72759	NA	NA	NA	NA	NA
A/Scotland/38/1996	EPI314865	EPI_ISL_89402	Europe / United Kingdom	Human	1996-12-06	329	unassigned	unassigned	0.600098	-4.35938	2.50586	c1	1996NH	2.13944	NA	NA	NA	NA	NA
A/South Africa/1147/1996	EPI390058	EPI_ISL_127594	Africa / South Africa	Human	1996	329	unassigned	unassigned	2.14062	-4.90625	0.955078	c1	1995NH	1.04297	NA	NA	NA	NA	NA
A/Wellington/48/1996	EPI2120649	EPI_ISL_14284918	Oceania / New Zealand / Wellington	Human	1996-06-05	329	unassigned	unassigned	1.14941	-5.48438	1.73535	c1	1996SH	0.320129	NA	NA	NA	NA	NA
A/Brisbane/7/1996	EPI2120282	EPI_ISL_14284808	Oceania / Australia / Queensland / Brisbane	Human	1996-06-12	329	unassigned	unassigned	1.15039	-5.46875	1.78613	c1	1996SH	0.318176	NA	NA	NA	NA	NA
A/Canberra/1/1996	EPI2120292	EPI_ISL_14284810	Oceania / Australia / Australian Capital Territory	Human	1996-03-08	329	unassigned	unassigned	0.754883	-5.58984	2.35547	c1	1996SH	0.942886	NA	NA	NA	NA	NA
A/Christchurch/1/1996	EPI2120296	EPI_ISL_14284812	Oceania / New Zealand / Canterbury / Christchurch	Human	1996-06-07	329	unassigned	unassigned	1.14941	-5.48438	1.73535	c1	1996SH	0.320129	NA	NA	NA	NA	NA
A/Nanchang/933/1995	EPI2120337	EPI_ISL_14284834	North America / United States / Georgia	Human	1996-02-05	329	unassigned	unassigned	0.728027	-5.51172	2.46094	c1	1996SH	1.00838	NA	NA	NA	NA	NA
A/Hong Kong/CUHK15208/1996	EPI1298638	EPI_ISL_326990	Asia / Hong Kong (SAR)	Human	1996-04-01	329	unassigned	unassigned	1.12109	-5.46875	1.82617	c1	1996SH	0.346681	NA	NA	NA	NA	NA
A/Hong Kong/CUHK10992/1996	EPI1298637	EPI_ISL_326989	Asia / Hong Kong (SAR)	Human	1996-04-01	329	unassigned	unassigned	0.900879	-5.12891	1.74316	c1	1996SH	0.40549	NA	NA	NA	NA	NA
A/Hong Kong/CUHK26553/1996	EPI1298639	EPI_ISL_326991	Asia / Hong Kong (SAR)	Human	1996-08-01	329	unassigned	unassigned	2.25586	-5.05078	1.00488	c1	1996SH	1.18755	NA	NA	NA	NA	NA
A/Hong Kong/CUHK10715/1996	EPI1298640	EPI_ISL_326992	Asia / Hong Kong (SAR)	Human	1996-03-01	329	unassigned	unassigned	1.10547	-5.28125	1.75098	c1	1996SH	0.215058	NA	NA	NA	NA	NA
A/Hong Kong/CUHK10922/1996	EPI1298641	EPI_ISL_326993	Asia / Hong Kong (SAR)	Human	1996-04-01	329	unassigned	unassigned	1.12109	-5.46875	1.82617	c1	1996SH	0.346681	NA	NA	NA	NA	NA
A/Hong Kong/CUHK10970/1996	EPI1298642	EPI_ISL_326994	Asia / Hong Kong (SAR)	Human	1996-04-01	329	unassigned	unassigned	0.900879	-5.12891	1.74316	c1	1996SH	0.40549	NA	NA	NA	NA	NA
A/Hong Kong/CUHK18334/1996	EPI1298671	EPI_ISL_327013	Asia / Hong Kong (SAR)	Human	1996-06-01	329	unassigned	unassigned	1.7168	-5.00391	1.25	c1	1996SH	0.638649	NA	NA	NA	NA	NA
A/Hong Kong/CUHK10886/1996	EPI1298672	EPI_ISL_327014	Asia / Hong Kong (SAR)	Human	1996-04-01	329	unassigned	unassigned	0.910645	-5.13281	1.75293	c1	1996SH	0.396801	NA	NA	NA	NA	NA
A/Hong Kong/CUHK10954/1996	EPI1298680	EPI_ISL_327022	Asia / Hong Kong (SAR)	Human	1996-04-01	329	unassigned	unassigned	2.4375	-5.21484	2.96484	c1	1996SH	1.71448	NA	NA	NA	NA	NA
A/Hong Kong/CUHK18325/1996	EPI1298681	EPI_ISL_327023	Asia / Hong Kong (SAR)	Human	1996-06-01	329	unassigned	unassigned	1.7373	-5.03516	1.35059	c1	1996SH	0.580021	NA	NA	NA	NA	NA
A/Hong Kong/CUHK10821/1996	EPI1298698	EPI_ISL_327040	Asia / Hong Kong (SAR)	Human	1996-04-01	329	unassigned	unassigned	0.938477	-5.14453	1.72754	c1	1996SH	0.364071	NA	NA	NA	NA	NA
A/Hong Kong/CUHK10930/1996	EPI1298710	EPI_ISL_327052	Asia / Hong Kong (SAR)	Human	1996-04-01	329	unassigned	unassigned	0.900879	-5.12891	1.74316	c1	1996SH	0.40549	NA	NA	NA	NA	NA
A/Hong Kong/CUHK15321/1996	EPI1298705	EPI_ISL_327047	Asia / Hong Kong (SAR)	Human	1996-05-01	329	unassigned	unassigned	2.16602	-5.24609	2.62891	c1	1996SH	1.28393	NA	NA	NA	NA	NA
A/Hong Kong/CUHK18255/1996	EPI1298707	EPI_ISL_327049	Asia / Hong Kong (SAR)	Human	1996-06-01	329	unassigned	unassigned	0.92041	-5.14453	1.75293	c1	1996SH	0.385369	NA	NA	NA	NA	NA
A/Hong Kong/CUHK15361/1996	EPI1298706	EPI_ISL_327048	Asia / Hong Kong (SAR)	Human	1996-05-01	329	unassigned	unassigned	0.900879	-5.12891	1.74316	c1	1996SH	0.40549	NA	NA	NA	NA	NA
A/Hong Kong/CUHK10905/1996	EPI1298709	EPI_ISL_327051	Asia / Hong Kong (SAR)	Human	1996-04-01	329	unassigned	unassigned	0.931152	-5.17578	1.74707	c1	1996SH	0.370272	NA	NA	NA	NA	NA
A/Hong Kong/CUHK21971/1996	EPI1298726	EPI_ISL_327068	Asia / Hong Kong (SAR)	Human	1996-07-01	329	unassigned	unassigned	1.67969	-4.93359	1.40137	c1	1996SH	0.549408	NA	NA	NA	NA	NA
A/Hong Kong/CUHK03269/1996	EPI1298727	EPI_ISL_327069	Asia / Hong Kong (SAR)	Human	1996-03-01	329	unassigned	unassigned	0.87793	-5.13281	1.74023	c1	1996SH	0.426802	NA	NA	NA	NA	NA
A/Hong Kong/CUHK15154/1996	EPI1298724	EPI_ISL_327066	Asia / Hong Kong (SAR)	Human	1996-04-01	329	unassigned	unassigned	0.977051	-5.16797	1.76562	c1	1996SH	0.329964	NA	NA	NA	NA	NA
A/Hong Kong/CUHK21907/1996	EPI1298725	EPI_ISL_327067	Asia / Hong Kong (SAR)	Human	1996-06-01	329	unassigned	unassigned	1.7168	-5.00391	1.25	c1	1996SH	0.638649	NA	NA	NA	NA	NA
A/Hong Kong/CUHK17970/1996	EPI1298766	EPI_ISL_327108	Asia / Hong Kong (SAR)	Human	1996-05-01	329	unassigned	unassigned	1.68848	-4.95312	1.18848	c1	1996SH	0.68201	NA	NA	NA	NA	NA
A/Hong Kong/CUHK15308/1996	EPI1298799	EPI_ISL_327141	Asia / Hong Kong (SAR)	Human	1996-04-01	329	unassigned	unassigned	0.900879	-5.12891	1.74316	c1	1996SH	0.40549	NA	NA	NA	NA	NA
A/Hong Kong/CUHK29206/1996	EPI1298801	EPI_ISL_327143	Asia / Hong Kong (SAR)	Human	1996-09-01	329	unassigned	unassigned	1.4502	-4.88672	1.29883	c1	1996NH	0.703566	NA	NA	NA	NA	NA
A/Hong Kong/CUHK15232/1996	EPI1298795	EPI_ISL_327137	Asia / Hong Kong (SAR)	Human	1996-04-01	329	unassigned	unassigned	0.886719	-5.13672	1.72461	c1	1996SH	0.415835	NA	NA	NA	NA	NA
A/Hong Kong/CUHK03421/1996	EPI1298823	EPI_ISL_327165	Asia / Hong Kong (SAR)	Human	1996-03-01	329	unassigned	unassigned	1.10547	-5.28125	1.75098	c1	1996SH	0.215058	NA	NA	NA	NA	NA
A/Hong Kong/CUHK18263/1996	EPI1298819	EPI_ISL_327161	Asia / Hong Kong (SAR)	Human	1996-06-01	329	unassigned	unassigned	1.68848	-4.95312	1.18848	c1	1996SH	0.68201	NA	NA	NA	NA	NA
A/Hong Kong/CUHK10703/1996	EPI1298827	EPI_ISL_327169	Asia / Hong Kong (SAR)	Human	1996-03-01	329	unassigned	unassigned	0.900879	-5.12891	1.74316	c1	1996SH	0.40549	NA	NA	NA	NA	NA
A/Hong Kong/CUHK03367/1996	EPI1298829	EPI_ISL_327171	Asia / Hong Kong (SAR)	Human	1996-03-01	329	unassigned	unassigned	2.16602	-5.24609	2.62891	c1	1996SH	1.28393	NA	NA	NA	NA	NA
A/Hong Kong/CUHK21764/1996	EPI1298835	EPI_ISL_327177	Asia / Hong Kong (SAR)	Human	1996-06-01	329	unassigned	unassigned	1.61035	-4.85156	0.984375	c1	1996SH	0.846096	NA	NA	NA	NA	NA
A/Hong Kong/391/97	EPI6210	EPI_ISL_1300	Asia / Hong Kong (SAR)	Human	1997	329	unassigned	unassigned	1.82129	-4.32812	-0.727539	c2	1996NH	1.43135	NA	NA	NA	NA	NA
A/Canberra/9/97	EPI6212	EPI_ISL_1301	Oceania / Australia / Australian Capital Territory	Human	1997	329	unassigned	unassigned	1.82129	-4.32812	-0.727539	c2	1996NH	1.43135	NA	NA	NA	NA	NA
A/Sydney/6/97	EPI6214	EPI_ISL_1302	Oceania / Australia / New South Wales	Human	1997	329	unassigned	unassigned	1.69043	-4.34375	-0.592285	c2	1996NH	1.27948	NA	NA	NA	NA	NA
A/Puerto Rico/1/97	EPI6216	EPI_ISL_1303	North America / Puerto Rico	Human	1997	329	unassigned	unassigned	1.82129	-4.32812	-0.727539	c2	1996NH	1.43135	NA	NA	NA	NA	NA
A/Hong Kong/387/97	EPI6218	EPI_ISL_1304	Asia / Hong Kong (SAR)	Human	1997	329	unassigned	unassigned	1.82129	-4.32812	-0.727539	c2	1996NH	1.43135	NA	NA	NA	NA	NA
A/Canada/2/97	EPI6220	EPI_ISL_1305	North America / Canada	Human	1997	329	unassigned	unassigned	0.375244	-3.68555	0.81543	c2	1996NH	1.5775	NA	NA	NA	NA	NA
A/Canada/10679/97	EPI6222	EPI_ISL_1306	North America / Canada	Human	1997	329	unassigned	unassigned	0.375244	-3.68555	0.81543	c2	1996NH	1.5775	NA	NA	NA	NA	NA
A/Auckland/5/97	EPI6224	EPI_ISL_1307	Oceania / New Zealand	Human	1997	329	unassigned	unassigned	1.74316	-4.32422	-0.568359	c2	1996NH	1.26933	NA	NA	NA	NA	NA
A/Wellington/3/97	EPI6226	EPI_ISL_1308	Oceania / New Zealand	Human	1997	329	unassigned	unassigned	1.32324	-4.71484	-0.418457	c2	1996NH	1.06917	NA	NA	NA	NA	NA
A/Hawaii/1/97	EPI6228	EPI_ISL_1309	North America / United States / Hawaii	Human	1997	329	unassigned	unassigned	1.9248	-4.23047	-0.666504	c2	1996NH	1.42756	NA	NA	NA	NA	NA
A/South Australia/54/97	EPI6230	EPI_ISL_1310	Oceania / Australia / South Australia	Human	1997	329	unassigned	unassigned	1.8252	-4.32422	-0.732422	c2	1996NH	1.43775	NA	NA	NA	NA	NA
A/Sydney/4/97	EPI6234	EPI_ISL_1312	Oceania / Australia / New South Wales	Human	1997	329	unassigned	unassigned	1.80957	-4.32422	-0.728516	c2	1996NH	1.43121	NA	NA	NA	NA	NA
A/Canberra/5/97	EPI6232	EPI_ISL_1311	Oceania / Australia / Australian Capital Territory	Human	1997	329	unassigned	unassigned	1.74316	-4.35547	-0.561523	c2	1996NH	1.25361	NA	NA	NA	NA	NA
A/Sydney/5/97	EPI11857	EPI_ISL_1313	Oceania / Australia / New South Wales / Sydney	Human	1997	329	unassigned	unassigned	2.41016	-4.07422	-0.956055	c2	1996NH	1.90754	NA	NA	NA	NA	NA
A/Korea/572/97	EPI6260	EPI_ISL_1325	Asia / Korea, Republic of	Human	1997	329	unassigned	unassigned	1.74609	-4.40625	-0.609863	c2	1996NH	1.2868	NA	NA	NA	NA	NA
A/Korea/679/97	EPI6258	EPI_ISL_1324	Asia / Korea, Republic of	Human	1997	329	unassigned	unassigned	1.74609	-4.40625	-0.609863	c2	1996NH	1.2868	NA	NA	NA	NA	NA
A/Japan/416/97	EPI6264	EPI_ISL_1327	Asia / Japan	Human	1997	329	unassigned	unassigned	1.79199	-4.37891	-0.714355	c2	1996NH	1.40071	NA	NA	NA	NA	NA
A/Korea/671/97	EPI6262	EPI_ISL_1326	Asia / Korea, Republic of	Human	1997	329	unassigned	unassigned	1.78027	-4.39453	-0.609375	c2	1996NH	1.29466	NA	NA	NA	NA	NA
A/Tianjing/51/97	EPI6270	EPI_ISL_1330	Asia / China	Human	1997	329	unassigned	unassigned	1.73145	-4.79688	1.14648	c1	1996NH	0.556333	NA	NA	NA	NA	NA
A/Johannesburg/3/97	EPI6278	EPI_ISL_1334	Africa / South Africa	Human	1997	329	unassigned	unassigned	1.30762	-5.31641	1.53711	c1	1996NH	1.1209	NA	NA	NA	NA	NA
A/Spain/214/97	EPI6290	EPI_ISL_1340	Europe / Spain	Human	1997	329	unassigned	unassigned	2.21289	-5.06641	1.06543	c1	1996NH	0.865719	NA	NA	NA	NA	NA
A/Beijing/17/97	EPI6286	EPI_ISL_1338	Asia / China	Human	1997	329	unassigned	unassigned	1.45996	-4.85938	1.32812	c1	1996NH	0.724345	NA	NA	NA	NA	NA
A/Beijing/62/97	EPI6284	EPI_ISL_1337	Asia / China	Human	1997	329	unassigned	unassigned	1.49805	-4.87109	1.33105	c1	1996NH	0.725586	NA	NA	NA	NA	NA
A/Russia/41/97	EPI6296	EPI_ISL_1343	Europe / Russian Federation	Human	1997	329	unassigned	unassigned	1.69922	-4.89062	1.22559	c1	1996NH	0.642112	NA	NA	NA	NA	NA
A/Thailand/78/97	EPI6310	EPI_ISL_1349	Asia / Thailand	Human	1997	329	unassigned	unassigned	0.688477	-5.47656	2.30664	c1	1996NH	2.04008	NA	NA	NA	NA	NA
A/Caracas/422/97	EPI6314	EPI_ISL_1351	South America / Venezuela, Bolivarian Republic of	Human	1997	329	unassigned	unassigned	1.19336	-5.49609	1.72461	c1	1996NH	1.3972	NA	NA	NA	NA	NA
A/Thailand/79/97	EPI6308	EPI_ISL_1348	Asia / Thailand	Human	1997	329	unassigned	unassigned	0.548828	-5.38281	2.41602	c1	1996NH	2.16087	NA	NA	NA	NA	NA
A/Rhode Island/7/97	EPI6380	EPI_ISL_1384	North America / United States / Rhode Island	Human	1997	329	unassigned	unassigned	1.85254	-4.78516	1.66602	c1	1996NH	1.08469	NA	NA	NA	NA	NA
A/Greece/4/97	EPI8310	EPI_ISL_1838	Europe / Greece	Human	1997	329	unassigned	unassigned	2.19336	-5.08203	0.991699	c1	1996NH	0.822159	NA	NA	NA	NA	NA
A/Athens/23/97	EPI8312	EPI_ISL_1839	Europe / Greece / Nomos Attica / Athens	Human	1997	329	unassigned	unassigned	2.52734	-4.97266	0.791504	c1	1996NH	1.01878	NA	NA	NA	NA	NA
A/Paris/908/97	EPI8703	EPI_ISL_1955	Europe / France	Human	1997	329	unassigned	unassigned	1.18555	-5.42188	1.78125	c1	1996NH	1.40538	NA	NA	NA	NA	NA
A/Seoul/69/97	EPI8926	EPI_ISL_2043	Asia / Korea, Republic of	Human	1997	329	unassigned	unassigned	1.79004	-3.76367	0.090271	c2	1996NH	1.11534	NA	NA	NA	NA	NA
A/Kwangju/1/97	EPI8920	EPI_ISL_2040	Asia / Korea, Republic of	Human	1997	329	unassigned	unassigned	3.80273	-5.74219	2.75391	c1	1996NH	3.26136	NA	NA	NA	NA	NA
A/Kwangju/4/97	EPI8922	EPI_ISL_2041	Asia / Korea, Republic of	Human	1997	329	unassigned	unassigned	1.75391	-5.00781	1.16797	c1	1996NH	0.648215	NA	NA	NA	NA	NA
A/Kwangju/63/97	EPI8924	EPI_ISL_2042	Asia / Korea, Republic of	Human	1997	329	unassigned	unassigned	1.79004	-3.76367	0.090271	c2	1996NH	1.11534	NA	NA	NA	NA	NA
A/Kangwon/78/97	EPI8928	EPI_ISL_2044	Asia / Korea, Republic of	Human	1997	329	unassigned	unassigned	1.82812	-4.35156	-0.595215	c2	1996NH	1.30171	NA	NA	NA	NA	NA
A/Daegu/84/97	EPI8930	EPI_ISL_2045	Asia / Korea, Republic of	Human	1997	329	unassigned	unassigned	1.78906	-4.30469	-0.811035	c2	1996NH	1.51136	NA	NA	NA	NA	NA
A/Kyounggi/102/97	EPI8932	EPI_ISL_2046	Asia / Korea, Republic of	Human	1997	329	unassigned	unassigned	1.77148	-4.32422	-0.803223	c2	1996NH	1.4961	NA	NA	NA	NA	NA
A/Seoul/104/97	EPI8934	EPI_ISL_2047	Asia / Korea, Republic of	Human	1997	329	unassigned	unassigned	1.82812	-4.35156	-0.595215	c2	1996NH	1.30171	NA	NA	NA	NA	NA
A/Kwangju/107/97	EPI8936	EPI_ISL_2048	Asia / Korea, Republic of	Human	1997	329	unassigned	unassigned	1.94531	-4.23047	-1.15723	c2	1996NH	1.88729	NA	NA	NA	NA	NA
A/Lisbon/1/97	EPI347453	EPI_ISL_100417	Europe / Portugal	Human	1997	329	unassigned	unassigned	1.7168	-5.00391	1.25	c1	1996NH	0.707391	NA	NA	NA	NA	NA
A/Dakar/6/97	EPI347455	EPI_ISL_100419	Africa / Senegal	Human	1997	329	unassigned	unassigned	1.18555	-5.42188	1.78125	c1	1996NH	1.40538	NA	NA	NA	NA	NA
A/Dakar/5/97	EPI347454	EPI_ISL_100418	Africa / Senegal	Human	1997	329	unassigned	unassigned	1.22949	-5.42969	1.76953	c1	1996NH	1.38875	NA	NA	NA	NA	NA
A/Perth/5/1997	EPI545296	EPI_ISL_167258	Oceania / Australia	Human	1997	329	unassigned	unassigned	1.61621	-4.68359	0.561035	c1	1996NH	0.0929561	NA	NA	NA	NA	NA
A/Perth/9/1997	EPI545297	EPI_ISL_167259	Oceania / Australia	Human	1997	329	unassigned	unassigned	1.43164	-5.03125	0.79541	c1	1996NH	0.380939	NA	NA	NA	NA	NA
A/Victoria/47/1997	EPI545295	EPI_ISL_167257	Oceania / Australia	Human	1997	329	unassigned	unassigned	1.4541	-5.04297	0.82959	c1	1996NH	0.400518	NA	NA	NA	NA	NA
A/Bangkok/1/1997	EPI545303	EPI_ISL_167265	Asia / Thailand	Human	1997	329	unassigned	unassigned	1.54395	-5.39453	1.38379	c1	1996NH	1.01925	NA	NA	NA	NA	NA
A/Tasmania/1/1997	EPI545299	EPI_ISL_167261	Oceania / Australia	Human	1997	329	unassigned	unassigned	1.57617	-4.92969	0.635742	c1	1996NH	0.216815	NA	NA	NA	NA	NA
A/Canberra/9/1997	EPI545307	EPI_ISL_167269	Oceania / Australia	Human	1997	329	unassigned	unassigned	1.82129	-4.32812	-0.727539	c2	1996NH	1.43135	NA	NA	NA	NA	NA
A/Sydney/5/1997	EPI545314	EPI_ISL_167276	Oceania / Australia	Human	1997	329	unassigned	unassigned	2.45898	-4.14844	-1.08496	c2	1996NH	2.01477	NA	NA	NA	NA	NA
A/Auckland/10/97	EPI24180	EPI_ISL_4392	Oceania / New Zealand	Human	1997	329	unassigned	unassigned	1.7041	-4.35156	-0.707031	c2	1996NH	1.38843	NA	NA	NA	NA	NA
A/Hong Kong/280/97	EPI24184	EPI_ISL_4394	Asia / Hong Kong (SAR)	Human	1997	329	unassigned	unassigned	1.7832	-4.99219	0.769531	c1	1996NH	0.387049	NA	NA	NA	NA	NA
A/Netherlands/300/97	EPI24188	EPI_ISL_4396	Europe / Netherlands	Human	1997	329	unassigned	unassigned	1.65625	-4.33203	-0.540527	c2	1996NH	1.23067	NA	NA	NA	NA	NA
A/New York/507/1997	EPI28740	EPI_ISL_5091	North America / United States / New York	Human	1997-12-17	329	unassigned	unassigned	1.82129	-4.32812	-0.727539	c2	1997NH	0.0860556	NA	NA	NA	NA	NA
A/New York/569/1997	EPI30032	EPI_ISL_5153	North America / United States / New York	Human	1997-01-03	329	unassigned	unassigned	0.695801	-5.17578	1.66992	c1	1996NH	1.43005	NA	NA	NA	NA	NA
A/New York/558/1997	EPI30411	EPI_ISL_5173	North America / United States / New York	Human	1997-01-06	329	unassigned	unassigned	1.22949	-5.4375	1.66504	c1	1996NH	1.30828	NA	NA	NA	NA	NA
A/New York/585/1997	EPI30544	EPI_ISL_5180	North America / United States / New York	Human	1997-01-22	329	unassigned	unassigned	1.84277	-5.01953	1.2627	c1	1996NH	0.76295	NA	NA	NA	NA	NA
A/New York/597/1997	EPI30658	EPI_ISL_5186	North America / United States / New York	Human	1997-01-06	329	unassigned	unassigned	1.75781	-4.98438	1.24414	c1	1996NH	0.705009	NA	NA	NA	NA	NA
A/Perth/13/1997	EPI1919371	EPI_ISL_5054224	Oceania / Australia / Western Australia / Casuarina	Human	1997-09-04	329	unassigned	unassigned	1.69043	-4.34375	-0.592285	c2	1997NH	0.126922	NA	NA	NA	NA	NA
A/Perth/15/1997	EPI1919373	EPI_ISL_5054225	Oceania / Australia / Western Australia / Casuarina	Human	1997	329	unassigned	unassigned	1.69043	-4.34375	-0.592285	c2	1996NH	1.27948	NA	NA	NA	NA	NA
A/New York/503/1997	EPI90839	EPI_ISL_8975	North America / United States / New York	Human	1997-11-29	329	unassigned	unassigned	1.81445	-4.33984	-0.730469	c2	1997NH	0.0898924	NA	NA	NA	NA	NA
A/New York/505/1997	EPI90858	EPI_ISL_8976	North America / United States / New York	Human	1997-12-02	329	unassigned	unassigned	1.82129	-4.32812	-0.727539	c2	1997NH	0.0860556	NA	NA	NA	NA	NA
A/New York/508/1997	EPI90877	EPI_ISL_8977	North America / United States / New York	Human	1997-12-22	329	unassigned	unassigned	1.82227	-4.33203	-0.723633	c2	1997NH	0.0830516	NA	NA	NA	NA	NA
A/New York/511/1997	EPI90915	EPI_ISL_8979	North America / United States / New York	Human	1997-12-17	329	unassigned	unassigned	1.82129	-4.32812	-0.727539	c2	1997NH	0.0860556	NA	NA	NA	NA	NA
A/New York/513/1997	EPI90934	EPI_ISL_8980	North America / United States / New York	Human	1997-12-24	329	unassigned	unassigned	1.82129	-4.32812	-0.727539	c2	1997NH	0.0860556	NA	NA	NA	NA	NA
A/New York/515/1997	EPI90953	EPI_ISL_8981	North America / United States / New York	Human	1997-12-21	329	unassigned	unassigned	1.82129	-4.32812	-0.727539	c2	1997NH	0.0860556	NA	NA	NA	NA	NA
A/New York/501/1997	EPI91352	EPI_ISL_9001	North America / United States / New York	Human	1997-11-26	329	unassigned	unassigned	1.69043	-4.34375	-0.592285	c2	1997NH	0.126922	NA	NA	NA	NA	NA
A/New York/509/1997	EPI91371	EPI_ISL_9002	North America / United States / New York	Human	1997-12-23	329	unassigned	unassigned	1.82129	-4.32812	-0.727539	c2	1997NH	0.0860556	NA	NA	NA	NA	NA
A/New York/516/1997	EPI91409	EPI_ISL_9004	North America / United States / New York	Human	1997-12-26	329	unassigned	unassigned	1.82227	-4.33203	-0.723633	c2	1997NH	0.0830516	NA	NA	NA	NA	NA
A/New York/522/1997	EPI91504	EPI_ISL_9009	North America / United States / New York	Human	1997-12-31	329	unassigned	unassigned	0.415771	-3.83398	0.546387	c2	1997NH	1.89128	NA	NA	NA	NA	NA
A/New York/524/1997	EPI91542	EPI_ISL_9011	North America / United States / New York	Human	1997-12-31	329	unassigned	unassigned	1.82129	-4.32812	-0.727539	c2	1997NH	0.0860556	NA	NA	NA	NA	NA
A/New York/545/1997	EPI91751	EPI_ISL_9022	North America / United States / New York	Human	1997-12-26	329	unassigned	unassigned	1.69043	-4.34375	-0.592285	c2	1997NH	0.126922	NA	NA	NA	NA	NA
A/New York/547/1997	EPI91789	EPI_ISL_9024	North America / United States / New York	Human	1997-12-28	329	unassigned	unassigned	1.82129	-4.32812	-0.727539	c2	1997NH	0.0860556	NA	NA	NA	NA	NA
A/New York/526/1997	EPI94962	EPI_ISL_9191	North America / United States / New York	Human	1997-12-29	329	unassigned	unassigned	1.88965	-4.59766	-0.158813	c2	1997NH	0.566541	NA	NA	NA	NA	NA
A/Rabat/33/97	EPI105504	EPI_ISL_10321	Africa / Morocco / Region de Rabat-Sale-Zemmour-Zaer / Rabat	Human	1997	329	unassigned	unassigned	1.44434	-4.90234	1.53223	c1	1996NH	0.933228	NA	NA	NA	NA	NA
A/Tasmania/1/1997	EPI1868440	EPI_ISL_2402567	Oceania / Australia	Human	1997-01-01	329	unassigned	unassigned	1.57617	-4.92969	0.635742	c1	1996NH	0.216815	NA	NA	NA	NA	NA
A/England/731/1997	EPI115139	EPI_ISL_11432	Europe / United Kingdom	Human	1997-11-26	329	unassigned	unassigned	0.728027	-5.51172	2.46094	c1	1997NH	3.49597	NA	NA	NA	NA	NA
A/Sydney/5/1997	EPI362863	EPI_ISL_111337	Oceania / Australia	Human	1997	329	unassigned	unassigned	2.41602	-4.08594	-1.04102	c2	1996NH	1.97732	NA	NA	NA	NA	NA
A/Hong Kong/CUHK12566/1997	EPI160983	EPI_ISL_14139	Asia / China	Human	1997-06-02	329	unassigned	unassigned	1.43945	-5.04297	0.853516	c1	1997SH	1.03504	NA	NA	NA	NA	NA
A/Hong Kong/CUHK12626/1997	EPI160986	EPI_ISL_14140	Asia / China	Human	1997-06-03	329	unassigned	unassigned	1.47461	-5.04688	0.820801	c1	1997SH	1.00826	NA	NA	NA	NA	NA
A/Hong Kong/CUHK12563/1997	EPI160982	EPI_ISL_14138	Asia / China	Human	1997-06-02	329	unassigned	unassigned	1.47461	-5.04688	0.820801	c1	1997SH	1.00826	NA	NA	NA	NA	NA
A/Hong Kong/CUHK12794/1997	EPI160987	EPI_ISL_14141	Asia / China	Human	1997-06-11	329	unassigned	unassigned	1.31934	-5.00391	0.843262	c1	1997SH	1.0139	NA	NA	NA	NA	NA
A/Hong Kong/CUHK12160/1997	EPI160976	EPI_ISL_14137	Asia / China	Human	1997-05-10	329	unassigned	unassigned	1.5625	-4.95703	1.37598	c1	1997SH	1.5221	NA	NA	NA	NA	NA
A/Hong Kong/CUHK20213/1997	EPI161030	EPI_ISL_14144	Asia / China	Human	1997-07-03	329	unassigned	unassigned	1.54492	-4.94141	1.24707	c1	1997SH	1.39152	NA	NA	NA	NA	NA
A/Hong Kong/CUHK20217/1997	EPI161031	EPI_ISL_14145	Asia / China	Human	1997-07-03	329	unassigned	unassigned	1.49902	-5.05469	0.818359	c1	1997SH	1.01116	NA	NA	NA	NA	NA
A/Hong Kong/CUHK20199/1997	EPI161028	EPI_ISL_14143	Asia / China	Human	1997-07-03	329	unassigned	unassigned	1.30469	-4.67578	0.494385	c1	1997SH	0.610061	NA	NA	NA	NA	NA
A/Hong Kong/CUHK20010/1997	EPI161025	EPI_ISL_14142	Asia / China	Human	1997-06-19	329	unassigned	unassigned	1.47461	-5.04688	0.820801	c1	1997SH	1.00826	NA	NA	NA	NA	NA
A/Hong Kong/CUHK20320/1997	EPI161036	EPI_ISL_14147	Asia / China	Human	1997-07-07	329	unassigned	unassigned	1.53613	-5.02734	0.713379	c1	1997SH	0.909448	NA	NA	NA	NA	NA
A/Hong Kong/CUHK20523/1997	EPI161037	EPI_ISL_14148	Asia / China	Human	1997-07-21	329	unassigned	unassigned	1.61816	-4.94531	1.37793	c1	1997SH	1.52881	NA	NA	NA	NA	NA
A/Hong Kong/CUHK20731/1997	EPI161038	EPI_ISL_14149	Asia / China	Human	1997-07-30	329	unassigned	unassigned	1.48438	-5.03906	0.81543	c1	1997SH	1.00114	NA	NA	NA	NA	NA
A/Hong Kong/CUHK22185/1997	EPI161064	EPI_ISL_14153	Asia / China	Human	1997-08-23	329	unassigned	unassigned	1.66602	-4.91797	0.580078	c1	1997SH	0.781546	NA	NA	NA	NA	NA
A/Hong Kong/CUHK22013/1997	EPI161057	EPI_ISL_14151	Asia / China	Human	1997-08-14	329	unassigned	unassigned	1.47461	-5.04688	0.820801	c1	1997SH	1.00826	NA	NA	NA	NA	NA
A/Hong Kong/CUHK41114/1997	EPI161138	EPI_ISL_14155	Asia / China	Human	1997-12-23	329	unassigned	unassigned	1.78906	-4.30469	-0.811035	c2	1997NH	0.168234	NA	NA	NA	NA	NA
A/Hong Kong/CUHK20992/1997	EPI161039	EPI_ISL_14150	Asia / China	Human	1997-08-13	329	unassigned	unassigned	1.48535	-5.07031	0.844727	c1	1997SH	1.04015	NA	NA	NA	NA	NA
A/Hong Kong/CUHK22048/1997	EPI161058	EPI_ISL_14152	Asia / China	Human	1997-08-19	329	unassigned	unassigned	1.66602	-4.91797	0.580078	c1	1997SH	0.781546	NA	NA	NA	NA	NA
A/Hong Kong/CUHK22736/1997	EPI161068	EPI_ISL_14154	Asia / China	Human	1997-09-12	329	unassigned	unassigned	1.49902	-4.89844	0.979492	c1	1997NH	1.75075	NA	NA	NA	NA	NA
A/Hong Kong/CUHK41507/1997	EPI161142	EPI_ISL_14159	Asia / China	Human	1997-12-29	329	unassigned	unassigned	1.78906	-4.30469	-0.811035	c2	1997NH	0.168234	NA	NA	NA	NA	NA
A/Hong Kong/CUHK41459/1997	EPI161140	EPI_ISL_14157	Asia / China	Human	1997-12-28	329	unassigned	unassigned	1.78906	-4.30469	-0.811035	c2	1997NH	0.168234	NA	NA	NA	NA	NA
A/Hong Kong/CUHK41222/1997	EPI161139	EPI_ISL_14156	Asia / China	Human	1997-12-25	329	unassigned	unassigned	1.83984	-4.32031	-0.663086	c2	1997NH	0.041158	NA	NA	NA	NA	NA
A/Hong Kong/CUHK41757/1997	EPI161143	EPI_ISL_14160	Asia / China	Human	1997-12-30	329	unassigned	unassigned	1.84082	-4.32812	-0.666504	c2	1997NH	0.044776	NA	NA	NA	NA	NA
A/Hong Kong/CUHK4245/1997	EPI161145	EPI_ISL_14161	Asia / China	Human	1997-03-14	329	unassigned	unassigned	2.26172	-5.04688	0.98877	c1	1997SH	1.44815	NA	NA	NA	NA	NA
A/Hong Kong/CUHK4391/1997	EPI161149	EPI_ISL_14162	Asia / China	Human	1997-03-22	329	unassigned	unassigned	1.4541	-5.04297	0.82959	c1	1997SH	1.01355	NA	NA	NA	NA	NA
A/Hong Kong/CUHK4803/1997	EPI161154	EPI_ISL_14166	Asia / China	Human	1997-04-17	329	unassigned	unassigned	1.47461	-5.04688	0.820801	c1	1997SH	1.00826	NA	NA	NA	NA	NA
A/Hong Kong/CUHK4622/1997	EPI161153	EPI_ISL_14165	Asia / China	Human	1997-04-08	329	unassigned	unassigned	1.4707	-5.03125	0.839355	c1	1997SH	1.01935	NA	NA	NA	NA	NA
A/Hong Kong/CUHK4529/1997	EPI161151	EPI_ISL_14163	Asia / China	Human	1997-04-02	329	unassigned	unassigned	1.4707	-5.03125	0.839355	c1	1997SH	1.01935	NA	NA	NA	NA	NA
A/Hong Kong/CUHK4542/1997	EPI161152	EPI_ISL_14164	Asia / China	Human	1997-04-02	329	unassigned	unassigned	1.47461	-5.04688	0.820801	c1	1997SH	1.00826	NA	NA	NA	NA	NA
A/Sydney/5/1997	EPI3460498	EPI_ISL_19284881	Oceania / Australia	Human	1997-12-31	329	unassigned	unassigned	2.41602	-4.08594	-1.04102	c2	1997NH	0.76599	NA	NA	NA	NA	NA
A/Auckland/10/1997	EPI367033	EPI_ISL_115568	Oceania / Australia	Human	1997-08-01	329	unassigned	unassigned	1.7041	-4.35156	-0.707031	c2	1997SH	0.741027	NA	NA	NA	NA	NA
A/Netherlands/300/1997	EPI367041	EPI_ISL_115619	Europe / Netherlands	Human	1997-12-23	329	unassigned	unassigned	1.65625	-4.33203	-0.540527	c2	1997NH	0.180464	NA	NA	NA	NA	NA
A/Perth/14/1997	EPI1885253	EPI_ISL_3492465	Oceania / Australia / Western Australia / Port Hedland	Human	1997-09-11	329	unassigned	unassigned	1.82129	-4.32812	-0.727539	c2	1997NH	0.0860556	NA	NA	NA	NA	NA
A/Sydney/5/97	EPI116875	EPI_ISL_21109	Oceania / Australia / New South Wales / Sydney	Human	1997	329	unassigned	unassigned	2.41602	-4.08594	-1.04102	c2	1996NH	1.97732	NA	NA	NA	NA	NA
A/Malaysia/13329/1997	EPI371856	EPI_ISL_119763	Asia / Malaysia	Human	1997-08-02	329	unassigned	unassigned	0.906738	-4.03906	-2.07227	c2	1997SH	2.11837	NA	NA	NA	NA	NA
A/Malaysia/13241/1997	EPI371843	EPI_ISL_119761	Asia / Malaysia	Human	1997-07-24	329	unassigned	unassigned	0.466797	-4.52734	0.855957	c2	1997SH	1.34737	NA	NA	NA	NA	NA
A/Malaysia/14590/1997	EPI371863	EPI_ISL_119764	Asia / Malaysia	Human	1997-12-06	329	unassigned	unassigned	0.84375	-4.19531	-2.21289	c2	1997NH	1.84328	NA	NA	NA	NA	NA
A/Malaysia/13328/1997	EPI371850	EPI_ISL_119762	Asia / Malaysia	Human	1997-08-02	329	unassigned	unassigned	0.906738	-4.03906	-2.07227	c2	1997SH	2.11837	NA	NA	NA	NA	NA
A/Malaysia/13381/1997	EPI371879	EPI_ISL_119767	Asia / Malaysia	Human	1997-08-06	329	unassigned	unassigned	0.906738	-4.03906	-2.07227	c2	1997SH	2.11837	NA	NA	NA	NA	NA
A/Malaysia/12132/1997	EPI373175	EPI_ISL_120346	Asia / Malaysia	Human	1997-03-18	329	unassigned	unassigned	0.930664	-4.11719	-2.20898	c2	1997SH	2.22011	NA	NA	NA	NA	NA
A/Malaysia/12942/1997	EPI373215	EPI_ISL_120351	Asia / Malaysia	Human	1997-06-20	329	unassigned	unassigned	1.39258	-3.9082	-2.00195	c2	1997SH	2.03849	NA	NA	NA	NA	NA
A/Malaysia/12726/1997	EPI373191	EPI_ISL_120348	Asia / Malaysia	Human	1997-06-02	329	unassigned	unassigned	1.57129	-4.95703	1.32227	c1	1997SH	1.47078	NA	NA	NA	NA	NA
A/Malaysia/12904/1997	EPI373207	EPI_ISL_120350	Asia / Malaysia	Human	1997-06-17	329	unassigned	unassigned	1.39258	-3.9082	-2.00195	c2	1997SH	2.03849	NA	NA	NA	NA	NA
A/Malaysia/12990/1997	EPI373231	EPI_ISL_120353	Asia / Malaysia	Human	1997-06-24	329	unassigned	unassigned	1.30371	-3.93945	-1.99023	c2	1997SH	2.01838	NA	NA	NA	NA	NA
A/Malaysia/13094/1997	EPI373247	EPI_ISL_120355	Asia / Malaysia	Human	1997-07-07	329	unassigned	unassigned	0.965332	-4.09766	-2.20703	c2	1997SH	2.21612	NA	NA	NA	NA	NA
A/Malaysia/12974/1997	EPI373223	EPI_ISL_120352	Asia / Malaysia	Human	1997-06-24	329	unassigned	unassigned	0.881836	-4.06641	-2.24219	c2	1997SH	2.27497	NA	NA	NA	NA	NA
A/Malaysia/13002/1997	EPI373239	EPI_ISL_120354	Asia / Malaysia	Human	1997-06-27	329	unassigned	unassigned	1.30371	-3.93945	-1.99023	c2	1997SH	2.01838	NA	NA	NA	NA	NA
A/Malaysia/13246/1997	EPI373255	EPI_ISL_120356	Asia / Malaysia	Human	1997-07-24	329	unassigned	unassigned	0.84375	-4.19531	-2.21289	c2	1997SH	2.22596	NA	NA	NA	NA	NA
A/Malaysia/12106/1997	EPI373743	EPI_ISL_120417	Asia / Malaysia	Human	1997-03-14	329	unassigned	unassigned	0.930664	-4.11719	-2.20898	c2	1997SH	2.22011	NA	NA	NA	NA	NA
A/Scotland/31/1997	EPI314871	EPI_ISL_89408	Europe / United Kingdom	Human	1997-01-12	329	unassigned	unassigned	0.632812	-4.39062	2.64453	c1	1996NH	2.24397	NA	NA	NA	NA	NA
A/Siena/1/1997	EPI171181	EPI_ISL_27599	Europe / Italy / Tuscany / Province of Siena	Human	1997-01-06	329	unassigned	unassigned	2.24219	-5.08203	1.12988	c1	1996NH	0.927895	NA	NA	NA	NA	NA
A/Sydney/5/1997	EPI176951	EPI_ISL_29667	Oceania / Australia / New South Wales / Sydney	Human	1997	329	unassigned	unassigned	2.41602	-4.08594	-1.04102	c2	1996NH	1.97732	NA	NA	NA	NA	NA
A/Bangkok/1/1997	EPI2120225	EPI_ISL_14284797	Asia / Thailand / Bangkok	Human	1997-02-11	329	unassigned	unassigned	1.54395	-5.39453	1.38379	c1	1997SH	1.66822	NA	NA	NA	NA	NA
A/Sydney/5/1997	EPI2120516	EPI_ISL_14284880	Oceania / Australia / New South Wales / Westmead	Human	1997-06-29	329	unassigned	unassigned	2.45898	-4.14844	-1.08496	c2	1997SH	1.53111	NA	NA	NA	NA	NA
A/Victoria/47/1997	EPI2120564	EPI_ISL_14284895	Oceania / Australia / Victoria / Sandringham	Human	1997-07-09	329	unassigned	unassigned	1.4541	-5.04297	0.82959	c1	1997SH	1.01355	NA	NA	NA	NA	NA
A/Canberra/9/1997	EPI2120294	EPI_ISL_14284811	Oceania / Australia / Australian Capital Territory / Woden	Human	1997-07-02	329	unassigned	unassigned	1.82129	-4.32812	-0.727539	c2	1997SH	0.821419	NA	NA	NA	NA	NA
A/Nagasaki/93/98	EPI27	EPI_ISL_14	Asia / Japan	Human	1998	329	unassigned	unassigned	1.88965	-4.27734	-0.755859	c2	1997NH	0.146989	NA	NA	NA	NA	NA
A/Nagasaki/76/98	EPI25	EPI_ISL_13	Asia / Japan	Human	1998	329	unassigned	unassigned	1.5332	-4.03516	-1.46582	c2	1997NH	0.910241	NA	NA	NA	NA	NA
A/CNIC/52/98	EPI7620	EPI_ISL_1721	Asia / China	Human	1998	329	unassigned	unassigned	1.74707	-4.13672	-1.7041	c2	1997NH	1.07702	NA	NA	NA	NA	NA
A/CNIC/3/98	EPI7618	EPI_ISL_1720	Asia / China	Human	1998	329	unassigned	unassigned	1.78809	-4.13281	-1.60059	c2	1997NH	0.974523	NA	NA	NA	NA	NA
A/CNIC/96/98	EPI7622	EPI_ISL_1722	Asia / China	Human	1998	329	unassigned	unassigned	1.89258	-4.08203	-1.68066	c2	1997NH	1.06696	NA	NA	NA	NA	NA
A/CNIC/97/98	EPI7624	EPI_ISL_1723	Asia / China	Human	1998	329	unassigned	unassigned	1.89258	-4.08203	-1.68066	c2	1997NH	1.06696	NA	NA	NA	NA	NA
A/CNIC/109/98	EPI7626	EPI_ISL_1724	Asia / China	Human	1998	329	unassigned	unassigned	1.89258	-4.08203	-1.68066	c2	1997NH	1.06696	NA	NA	NA	NA	NA
A/CNIC/121/98	EPI7628	EPI_ISL_1725	Asia / China	Human	1998	329	unassigned	unassigned	1.89258	-4.08203	-1.68066	c2	1997NH	1.06696	NA	NA	NA	NA	NA
A/CNIC/145/98	EPI7634	EPI_ISL_1728	Asia / China	Human	1998	329	unassigned	unassigned	1.89258	-4.08203	-1.68066	c2	1997NH	1.06696	NA	NA	NA	NA	NA
A/CNIC/130/98	EPI7632	EPI_ISL_1727	Asia / China	Human	1998	329	unassigned	unassigned	1.89258	-4.08203	-1.68066	c2	1997NH	1.06696	NA	NA	NA	NA	NA
A/CNIC/125/98	EPI7630	EPI_ISL_1726	Asia / China	Human	1998	329	unassigned	unassigned	1.91699	-4.0625	-1.68848	c2	1997NH	1.0813	NA	NA	NA	NA	NA
A/CNIC/149/98	EPI7638	EPI_ISL_1730	Asia / China	Human	1998	329	unassigned	unassigned	1.89258	-4.08203	-1.68066	c2	1997NH	1.06696	NA	NA	NA	NA	NA
A/CNIC/146/98	EPI7636	EPI_ISL_1729	Asia / China	Human	1998	329	unassigned	unassigned	2.18555	-4.42969	-1.0752	c2	1997NH	0.586868	NA	NA	NA	NA	NA
A/Athens/76/98	EPI8292	EPI_ISL_1829	Europe / Greece / Nomos Attica / Athens	Human	1998	329	unassigned	unassigned	1.75391	-4.30078	-0.744141	c2	1997NH	0.113104	NA	NA	NA	NA	NA
A/Greece/106/98	EPI8298	EPI_ISL_1832	Europe / Greece	Human	1998	329	unassigned	unassigned	1.64746	-4.33984	-0.876953	c2	1997NH	0.281255	NA	NA	NA	NA	NA
A/Athens/1/98	EPI8314	EPI_ISL_1840	Europe / Greece / Nomos Attica / Athens	Human	1998	329	unassigned	unassigned	2.42383	-4.9375	0.789062	c1	1997NH	1.67991	NA	NA	NA	NA	NA
A/Athens/16/98	EPI8346	EPI_ISL_1842	Europe / Greece / Nomos Attica / Athens	Human	1998	329	unassigned	unassigned	1.65234	-4.04297	-1.57227	c2	1997NH	0.979935	NA	NA	NA	NA	NA
A/Athens/2/98	EPI8340	EPI_ISL_1844	Europe / Greece / Nomos Attica / Athens	Human	1998	329	unassigned	unassigned	2.42383	-4.9375	0.789062	c1	1997NH	1.67991	NA	NA	NA	NA	NA
A/Athens/7/98	EPI8342	EPI_ISL_1845	Europe / Greece / Nomos Attica / Athens	Human	1998	329	unassigned	unassigned	1.65234	-4.04297	-1.57227	c2	1997NH	0.979935	NA	NA	NA	NA	NA
A/Greece/10/98	EPI8344	EPI_ISL_1846	Europe / Greece	Human	1998	329	unassigned	unassigned	1.65234	-4.04297	-1.57227	c2	1997NH	0.979935	NA	NA	NA	NA	NA
A/Greece/18/98	EPI8348	EPI_ISL_1843	Europe / Greece	Human	1998	329	unassigned	unassigned	2.24609	-3.50586	-1.39355	c2	1997NH	1.19057	NA	NA	NA	NA	NA
A/Switzerland/7729/98	EPI8854	EPI_ISL_2018	Europe / Switzerland	Human	1998	329	unassigned	unassigned	1.83301	-4.32031	-0.65625	c2	1997NH	0.032072	NA	NA	NA	NA	NA
A/Pusan/10/98	EPI8908	EPI_ISL_2034	Asia / Korea, Republic of	Human	1998	329	unassigned	unassigned	0.753906	-5.61328	5.19922	c1	1997NH	6.07634	NA	NA	NA	NA	NA
A/Pusan/68/98	EPI8940	EPI_ISL_2050	Asia / Korea, Republic of	Human	1998	329	unassigned	unassigned	1.84277	-4.27734	-0.822754	c2	1997NH	0.187539	NA	NA	NA	NA	NA
A/Seoul/95/98	EPI8942	EPI_ISL_2051	Asia / Korea, Republic of	Human	1998	329	unassigned	unassigned	1.84277	-4.27734	-0.822754	c2	1997NH	0.187539	NA	NA	NA	NA	NA
A/Seoul/37/98	EPI8938	EPI_ISL_2049	Asia / Korea, Republic of	Human	1998	329	unassigned	unassigned	1.83984	-4.32031	-0.663086	c2	1997NH	0.041158	NA	NA	NA	NA	NA
A/Sichuan/346/98	EPI347447	EPI_ISL_100411	Asia / China	Human	1998-08-14	329	unassigned	unassigned	2.40234	-3.34961	-0.117493	c2	1998SH	1.37256	NA	NA	NA	NA	NA
A/New Caledonia/12/1998	EPI1937919	EPI_ISL_6949625	Oceania / New Caledonia	Human	1998-05-02	329	unassigned	unassigned	1.89746	-4.12891	-1.52441	c2	1998SH	0.516465	NA	NA	NA	NA	NA
A/Fes/314//98	EPI238766	EPI_ISL_68580	Africa / Morocco	Human	1998	329	unassigned	unassigned	1.57031	-4.97266	1.37793	c1	1997NH	2.13796	NA	NA	NA	NA	NA
A/zhejiang/10/98	EPI15298	EPI_ISL_3113	Asia / China / Zhejiang Province	Human	1998	329	unassigned	unassigned	1.85742	-5.02734	1.23535	c1	1997NH	2.00943	NA	NA	NA	NA	NA
A/Victoria/507/1998	EPI545317	EPI_ISL_167279	Oceania / Australia	Human	1998	329	unassigned	unassigned	1.91309	-4.19922	-1.28809	c2	1997NH	0.66411	NA	NA	NA	NA	NA
A/Memphis/31/98	EPI18451	EPI_ISL_3459	North America / United States / Tennessee	Human	1998	329	unassigned	unassigned	1.56641	-4.07812	-1.4082	c2	1997NH	0.835369	NA	NA	NA	NA	NA
A/Netherlands/414/98	EPI24190	EPI_ISL_4397	Europe / Netherlands	Human	1998	329	unassigned	unassigned	1.85156	-4.30078	-0.650879	c2	1997NH	0.0515613	NA	NA	NA	NA	NA
A/Netherlands/427/98	EPI24192	EPI_ISL_4398	Europe / Netherlands	Human	1998	329	unassigned	unassigned	1.90332	-4.1875	-1.29297	c2	1997NH	0.669502	NA	NA	NA	NA	NA
A/Netherlands/462/98	EPI24194	EPI_ISL_4399	Europe / Netherlands	Human	1998	329	unassigned	unassigned	1.79395	-3.95508	-1.13281	c2	1997NH	0.60895	NA	NA	NA	NA	NA
A/New York/504/1998	EPI28721	EPI_ISL_5090	North America / United States / New York	Human	1998-01-01	329	unassigned	unassigned	1.82129	-4.32812	-0.727539	c2	1997NH	0.0860556	NA	NA	NA	NA	NA
A/New York/529/1998	EPI28778	EPI_ISL_5093	North America / United States / New York	Human	1998-02-28	329	unassigned	unassigned	1.69043	-4.34375	-0.592285	c2	1998SH	0.468749	NA	NA	NA	NA	NA
A/New York/514/1998	EPI28759	EPI_ISL_5092	North America / United States / New York	Human	1998-01-13	329	unassigned	unassigned	1.82129	-4.32812	-0.727539	c2	1997NH	0.0860556	NA	NA	NA	NA	NA
A/New York/540/1998	EPI28816	EPI_ISL_5095	North America / United States / New York	Human	1998-02-15	329	unassigned	unassigned	1.69043	-4.34375	-0.592285	c2	1998SH	0.468749	NA	NA	NA	NA	NA
A/New York/530/1998	EPI28797	EPI_ISL_5094	North America / United States / New York	Human	1998-01-19	329	unassigned	unassigned	1.82129	-4.32812	-0.727539	c2	1997NH	0.0860556	NA	NA	NA	NA	NA
A/New York/549/1998	EPI28835	EPI_ISL_5096	North America / United States / New York	Human	1998-01-19	329	unassigned	unassigned	1.82129	-4.32812	-0.727539	c2	1997NH	0.0860556	NA	NA	NA	NA	NA
A/New York/550/1998	EPI28854	EPI_ISL_5097	North America / United States / New York	Human	1998-01-25	329	unassigned	unassigned	1.69043	-4.34375	-0.592285	c2	1997NH	0.126922	NA	NA	NA	NA	NA
A/New York/536/1998	EPI31228	EPI_ISL_5215	North America / United States / New York	Human	1998-02-03	329	unassigned	unassigned	1.70801	-4.58594	-0.774414	c2	1998SH	0.461603	NA	NA	NA	NA	NA
A/Sao Paulo/61/1998	EPI843279	EPI_ISL_235397	South America / Brazil	Human	1998-06-09	329	unassigned	unassigned	1.74121	-4.29297	-0.548828	c2	1998SH	0.485873	NA	NA	NA	NA	NA
A/New York/240/1998	EPI53991	EPI_ISL_6721	North America / United States / New York	Human	1998-12-28	329	unassigned	unassigned	0.879883	-4.12109	-2.17773	c2	1998NH	0.766723	NA	NA	NA	NA	NA
A/New York/249/1998	EPI54010	EPI_ISL_6722	North America / United States / New York	Human	1998-12-12	329	unassigned	unassigned	0.952148	-4.10156	-2.17188	c2	1998NH	0.715521	NA	NA	NA	NA	NA
A/New York/250/1998	EPI54029	EPI_ISL_6723	North America / United States / New York	Human	1998-12-12	329	unassigned	unassigned	1.84277	-4.27734	-0.822754	c2	1998NH	0.919108	NA	NA	NA	NA	NA
A/New York/247/1998	EPI54050	EPI_ISL_6724	North America / United States / New York	Human	1998-11-02	329	unassigned	unassigned	1.91309	-4.19922	-1.28809	c2	1998NH	0.611131	NA	NA	NA	NA	NA
A/New York/224/1998	EPI54202	EPI_ISL_6732	North America / United States / New York	Human	1998-12-28	329	unassigned	unassigned	0.930664	-4.11719	-2.20898	c2	1998NH	0.757385	NA	NA	NA	NA	NA
A/New York/256/1998	EPI54240	EPI_ISL_6734	North America / United States / New York	Human	1998-12-30	329	unassigned	unassigned	0.930664	-4.11719	-2.20898	c2	1998NH	0.757385	NA	NA	NA	NA	NA
A/New York/287/1998	EPI54449	EPI_ISL_6745	North America / United States / New York	Human	1998-12-29	329	unassigned	unassigned	1.84277	-4.27734	-0.822754	c2	1998NH	0.919108	NA	NA	NA	NA	NA
A/Sri Lanka/6/1998	EPI1919410	EPI_ISL_5054254	Asia / Sri Lanka	Human	1998	329	unassigned	unassigned	1.91309	-4.19922	-1.28809	c2	1997NH	0.66411	NA	NA	NA	NA	NA
A/New York/289/1998	EPI78343	EPI_ISL_8160	North America / United States / New York	Human	1998-12-04	329	unassigned	unassigned	1.70996	-4.33594	-0.525879	c2	1998NH	1.15098	NA	NA	NA	NA	NA
A/New York/304/1998	EPI78381	EPI_ISL_8162	North America / United States / New York	Human	1998-12-30	329	unassigned	unassigned	0.930664	-4.11719	-2.20898	c2	1998NH	0.757385	NA	NA	NA	NA	NA
A/New York/313/1998	EPI78419	EPI_ISL_8164	North America / United States / New York	Human	1998-12-28	329	unassigned	unassigned	0.930664	-4.11719	-2.20898	c2	1998NH	0.757385	NA	NA	NA	NA	NA
A/New York/254/1998	EPI79141	EPI_ISL_8201	North America / United States / New York	Human	1998-12-31	329	unassigned	unassigned	0.916992	-4.01562	-2.07812	c2	1998NH	0.679857	NA	NA	NA	NA	NA
A/New York/328/1998	EPI79730	EPI_ISL_8232	North America / United States / New York	Human	1998-12-28	329	unassigned	unassigned	0.879883	-4.12109	-2.17773	c2	1998NH	0.766723	NA	NA	NA	NA	NA
A/New York/330/1998	EPI79749	EPI_ISL_8233	North America / United States / New York	Human	1998-12-30	329	unassigned	unassigned	1.15918	-4	-2.22266	c2	1998NH	0.666659	NA	NA	NA	NA	NA
A/New York/251/1998	EPI80129	EPI_ISL_8252	North America / United States / New York	Human	1998-12-28	329	unassigned	unassigned	1.89062	-4.13281	-1.53125	c2	1998NH	0.49623	NA	NA	NA	NA	NA
A/New York/448/1998	EPI84464	EPI_ISL_8677	North America / United States / New York	Human	1998-11-23	329	unassigned	unassigned	1.70996	-4.33594	-0.525879	c2	1998NH	1.15098	NA	NA	NA	NA	NA
A/New York/510/1998	EPI90896	EPI_ISL_8978	North America / United States / New York	Human	1998-02-20	329	unassigned	unassigned	1.82129	-4.32812	-0.727539	c2	1998SH	0.312632	NA	NA	NA	NA	NA
A/New York/517/1998	EPI90972	EPI_ISL_8982	North America / United States / New York	Human	1998-01-03	329	unassigned	unassigned	1.875	-4.28125	-0.817383	c2	1997NH	0.191175	NA	NA	NA	NA	NA
A/New York/512/1998	EPI91390	EPI_ISL_9003	North America / United States / New York	Human	1998-01-29	329	unassigned	unassigned	1.82129	-4.32812	-0.727539	c2	1997NH	0.0860556	NA	NA	NA	NA	NA
A/New York/519/1998	EPI91447	EPI_ISL_9006	North America / United States / New York	Human	1998-02-13	329	unassigned	unassigned	1.82422	-4.32422	-0.740723	c2	1998SH	0.298809	NA	NA	NA	NA	NA
A/New York/520/1998	EPI91466	EPI_ISL_9007	North America / United States / New York	Human	1998-01-05	329	unassigned	unassigned	2.38867	-4.28906	-1.08594	c2	1997NH	0.733926	NA	NA	NA	NA	NA
A/New York/521/1998	EPI91485	EPI_ISL_9008	North America / United States / New York	Human	1998-01-19	329	unassigned	unassigned	1.82129	-4.32812	-0.727539	c2	1997NH	0.0860556	NA	NA	NA	NA	NA
A/New York/523/1998	EPI91523	EPI_ISL_9010	North America / United States / New York	Human	1998-02-02	329	unassigned	unassigned	1.68848	-4.32812	-0.567383	c2	1998SH	0.488294	NA	NA	NA	NA	NA
A/New York/525/1998	EPI91561	EPI_ISL_9012	North America / United States / New York	Human	1998-03-03	329	unassigned	unassigned	1.81055	-4.32422	-0.721191	c2	1998SH	0.317903	NA	NA	NA	NA	NA
A/New York/528/1998	EPI91580	EPI_ISL_9013	North America / United States / New York	Human	1998-01-08	329	unassigned	unassigned	1.70996	-4.32812	-0.518555	c2	1997NH	0.156751	NA	NA	NA	NA	NA
A/New York/531/1998	EPI91599	EPI_ISL_9014	North America / United States / New York	Human	1998-02-22	329	unassigned	unassigned	1.82715	-4.33203	-0.729492	c2	1998SH	0.312011	NA	NA	NA	NA	NA
A/New York/532/1998	EPI91618	EPI_ISL_9015	North America / United States / New York	Human	1998-01-18	329	unassigned	unassigned	1.70996	-4.32812	-0.518555	c2	1997NH	0.156751	NA	NA	NA	NA	NA
A/New York/533/1998	EPI91637	EPI_ISL_9016	North America / United States / New York	Human	1998-02-01	329	unassigned	unassigned	1.5625	-4.23828	-0.715332	c2	1998SH	0.409617	NA	NA	NA	NA	NA
A/New York/534/1998	EPI91656	EPI_ISL_9017	North America / United States / New York	Human	1998-01-29	329	unassigned	unassigned	1.82129	-4.32812	-0.727539	c2	1997NH	0.0860556	NA	NA	NA	NA	NA
A/New York/539/1998	EPI91675	EPI_ISL_9018	North America / United States / New York	Human	1998-02-10	329	unassigned	unassigned	1.91309	-4.19922	-1.28809	c2	1998SH	0.280255	NA	NA	NA	NA	NA
A/New York/542/1998	EPI91713	EPI_ISL_9020	North America / United States / New York	Human	1998-02-19	329	unassigned	unassigned	1.82129	-4.32812	-0.727539	c2	1998SH	0.312632	NA	NA	NA	NA	NA
A/New York/543/1998	EPI91732	EPI_ISL_9021	North America / United States / New York	Human	1998-02-17	329	unassigned	unassigned	1.82422	-4.32422	-0.740723	c2	1998SH	0.298809	NA	NA	NA	NA	NA
A/New York/546/1998	EPI91770	EPI_ISL_9023	North America / United States / New York	Human	1998-01-26	329	unassigned	unassigned	1.82129	-4.32812	-0.727539	c2	1997NH	0.0860556	NA	NA	NA	NA	NA
A/New York/548/1998	EPI91808	EPI_ISL_9025	North America / United States / New York	Human	1998-02-12	329	unassigned	unassigned	1.69824	-4.21875	-0.850586	c2	1998SH	0.217921	NA	NA	NA	NA	NA
A/New York/535/1998	EPI92093	EPI_ISL_9040	North America / United States / New York	Human	1998-03-05	329	unassigned	unassigned	1.69922	-4.43359	-0.137451	c2	1998SH	0.918321	NA	NA	NA	NA	NA
A/New York/506/1998	EPI92131	EPI_ISL_9042	North America / United States / New York	Human	1998-02-02	329	unassigned	unassigned	1.84277	-4.3125	-0.730469	c2	1998SH	0.304293	NA	NA	NA	NA	NA
A/New York/527/1998	EPI92150	EPI_ISL_9043	North America / United States / New York	Human	1998-03-15	329	unassigned	unassigned	1.69043	-4.34375	-0.592285	c2	1998SH	0.468749	NA	NA	NA	NA	NA
A/New York/538/1998	EPI92169	EPI_ISL_9044	North America / United States / New York	Human	1998-02-08	329	unassigned	unassigned	1.69043	-4.34375	-0.592285	c2	1998SH	0.468749	NA	NA	NA	NA	NA
A/New York/502/1998	EPI95440	EPI_ISL_9217	North America / United States / New York	Human	1998-03-20	329	unassigned	unassigned	1.82129	-4.32812	-0.727539	c2	1998SH	0.312632	NA	NA	NA	NA	NA
A/New York/544/1998	EPI96257	EPI_ISL_9260	North America / United States / New York	Human	1998-02-02	329	unassigned	unassigned	1.82129	-4.32812	-0.727539	c2	1998SH	0.312632	NA	NA	NA	NA	NA
A/Stockholm/19/98	EPI98239	EPI_ISL_9496	Europe / Sweden	Human	1998	329	unassigned	unassigned	1.84277	-4.25	-1.31738	c2	1997NH	0.677999	NA	NA	NA	NA	NA
A/Zhejiang/18/98	EPI98958	EPI_ISL_9606	Asia / China / Zhejiang Province	Human	1998	329	unassigned	unassigned	1.8125	-4.30469	-0.817871	c2	1997NH	0.174664	NA	NA	NA	NA	NA
A/Rabat/236/98	EPI105506	EPI_ISL_10322	Africa / Morocco / Region de Rabat-Sale-Zemmour-Zaer / Rabat	Human	1998	329	unassigned	unassigned	1.44434	-4.90234	1.53223	c1	1997NH	2.2817	NA	NA	NA	NA	NA
A/Rabat/227/98	EPI105512	EPI_ISL_10325	Africa / Morocco / Region de Rabat-Sale-Zemmour-Zaer / Rabat	Human	1998	329	unassigned	unassigned	1.55469	-4.95703	1.38574	c1	1997NH	2.1424	NA	NA	NA	NA	NA
A/Fes/273/98	EPI105514	EPI_ISL_10326	Africa / Morocco / Region de Fes-Boulemane / Fes	Human	1998	329	unassigned	unassigned	1.55469	-4.95703	1.38574	c1	1997NH	2.1424	NA	NA	NA	NA	NA
A/Marrakech/90/98	EPI105508	EPI_ISL_10323	Africa / Morocco / Region de Marrakech-Tensift-Al Haouz	Human	1998	329	unassigned	unassigned	1.44434	-4.90234	1.53223	c1	1997NH	2.2817	NA	NA	NA	NA	NA
A/Marrakech/116/98	EPI105516	EPI_ISL_10327	Africa / Morocco / Region de Marrakech-Tensift-Al Haouz	Human	1998	329	unassigned	unassigned	1.55469	-4.95703	1.38574	c1	1997NH	2.1424	NA	NA	NA	NA	NA
A/Casa/78/98	EPI105518	EPI_ISL_10328	Africa / Morocco	Human	1998	329	unassigned	unassigned	1.55469	-4.95703	1.38574	c1	1997NH	2.1424	NA	NA	NA	NA	NA
A/Christchurch/45/98	EPI116881	EPI_ISL_11979	Oceania / New Zealand / Christchurch	Human	1998-08-17	329	unassigned	unassigned	1.94043	-4.07031	-1.59082	c2	1998SH	0.599177	NA	NA	NA	NA	NA
A/Waikato/12/98	EPI116879	EPI_ISL_11978	Oceania / New Zealand / Waikato	Human	1998	329	unassigned	unassigned	1.94043	-4.07031	-1.59082	c2	1997NH	0.988274	NA	NA	NA	NA	NA
A/Perth/24/98	EPI116895	EPI_ISL_11986	Oceania / Australia / Western Australia	Human	1998	329	unassigned	unassigned	1.83008	-4.32031	-0.669922	c2	1997NH	0.0372466	NA	NA	NA	NA	NA
A/johannesburg/3/98	EPI116897	EPI_ISL_11987	Africa / South Africa / Gauteng / Johannesburg	Human	1998-03-20	329	unassigned	unassigned	1.83984	-4.32031	-0.663086	c2	1998SH	0.370894	NA	NA	NA	NA	NA
A/Thailand/Siriraj-08/1998	EPI117638	EPI_ISL_12300	Asia / Thailand	Human	1998	329	unassigned	unassigned	2.56445	-3.70312	-1.36914	c2	1997NH	1.21783	NA	NA	NA	NA	NA
A/Netherlands/427/1998	EPI362889	EPI_ISL_111373	Europe / Netherlands	Human	1998-11-16	329	unassigned	unassigned	1.94922	-4.17578	-1.26953	c2	1998NH	0.649392	NA	NA	NA	NA	NA
A/Hong Kong/CUHK10276/1998	EPI160958	EPI_ISL_14169	Asia / China	Human	1998-01-05	329	unassigned	unassigned	1.83984	-4.32031	-0.663086	c2	1997NH	0.041158	NA	NA	NA	NA	NA
A/Hong Kong/CUHK10756/1998	EPI160965	EPI_ISL_14174	Asia / China	Human	1998-01-20	329	unassigned	unassigned	1.83984	-4.32031	-0.663086	c2	1997NH	0.041158	NA	NA	NA	NA	NA
A/Hong Kong/CUHK10186/1998	EPI160956	EPI_ISL_14167	Asia / China	Human	1998-01-04	329	unassigned	unassigned	1.83984	-4.32031	-0.663086	c2	1997NH	0.041158	NA	NA	NA	NA	NA
A/Hong Kong/CUHK10216/1998	EPI160957	EPI_ISL_14168	Asia / China	Human	1998-01-05	329	unassigned	unassigned	1.83984	-4.32031	-0.663086	c2	1997NH	0.041158	NA	NA	NA	NA	NA
A/Hong Kong/CUHK10554/1998	EPI160961	EPI_ISL_14171	Asia / China	Human	1998-01-13	329	unassigned	unassigned	1.79297	-4.15625	-1.22656	c2	1997NH	0.60475	NA	NA	NA	NA	NA
A/Hong Kong/CUHK10632/1998	EPI160963	EPI_ISL_14172	Asia / China	Human	1998-01-14	329	unassigned	unassigned	1.66602	-4.34766	-0.749023	c2	1997NH	0.175531	NA	NA	NA	NA	NA
A/Hong Kong/CUHK10660/1998	EPI160964	EPI_ISL_14173	Asia / China	Human	1998-01-16	329	unassigned	unassigned	1.84766	-4.31641	-0.644043	c2	1997NH	0.044213	NA	NA	NA	NA	NA
A/Hong Kong/CUHK10537/1998	EPI160960	EPI_ISL_14170	Asia / China	Human	1998-01-12	329	unassigned	unassigned	1.83984	-4.32031	-0.663086	c2	1997NH	0.041158	NA	NA	NA	NA	NA
A/Hong Kong/CUHK10954/1998	EPI160966	EPI_ISL_14175	Asia / China	Human	1998-01-28	329	unassigned	unassigned	1.91309	-4.19922	-1.28809	c2	1997NH	0.66411	NA	NA	NA	NA	NA
A/Hong Kong/CUHK10958/1998	EPI160967	EPI_ISL_14176	Asia / China	Human	1998-01-29	329	unassigned	unassigned	1.83984	-4.32031	-0.663086	c2	1997NH	0.041158	NA	NA	NA	NA	NA
A/Hong Kong/CUHK10960/1998	EPI160968	EPI_ISL_14177	Asia / China	Human	1998-01-29	329	unassigned	unassigned	1.83984	-4.32031	-0.663086	c2	1997NH	0.041158	NA	NA	NA	NA	NA
A/Hong Kong/CUHK16614/1998	EPI161008	EPI_ISL_14178	Asia / China	Human	1998-07-13	329	unassigned	unassigned	2.11133	-4.46875	-0.744141	c2	1998SH	0.463594	NA	NA	NA	NA	NA
A/Hong Kong/CUHK17464/1998	EPI161009	EPI_ISL_14179	Asia / China	Human	1998-08-06	329	unassigned	unassigned	1.74512	-4.31641	-0.732422	c2	1998SH	0.317087	NA	NA	NA	NA	NA
A/Hong Kong/CUHK17603/1998	EPI161010	EPI_ISL_14180	Asia / China	Human	1998-08-12	329	unassigned	unassigned	2.09375	-4.49219	-0.752441	c2	1998SH	0.462017	NA	NA	NA	NA	NA
A/Hong Kong/CUHK17643/1998	EPI161011	EPI_ISL_14181	Asia / China	Human	1998-08-14	329	unassigned	unassigned	2.09375	-4.49219	-0.752441	c2	1998SH	0.462017	NA	NA	NA	NA	NA
A/Hong Kong/CUHK17697/1998	EPI161012	EPI_ISL_14182	Asia / China	Human	1998-08-16	329	unassigned	unassigned	1.8125	-4.30469	-0.817871	c2	1998SH	0.221089	NA	NA	NA	NA	NA
A/Hong Kong/CUHK17704/1998	EPI161013	EPI_ISL_14183	Asia / China	Human	1998-08-17	329	unassigned	unassigned	2.11133	-4.46875	-0.744141	c2	1998SH	0.463594	NA	NA	NA	NA	NA
A/Hong Kong/CUHK17872/1998	EPI161015	EPI_ISL_14185	Asia / China	Human	1998-08-24	329	unassigned	unassigned	1.90332	-4.1875	-1.29297	c2	1998SH	0.283421	NA	NA	NA	NA	NA
A/Hong Kong/CUHK17707/1998	EPI161014	EPI_ISL_14184	Asia / China	Human	1998-08-18	329	unassigned	unassigned	1.78906	-4.30469	-0.811035	c2	1998SH	0.230976	NA	NA	NA	NA	NA
A/Hong Kong/CUHK18886/1998	EPI161023	EPI_ISL_14193	Asia / China	Human	1998-10-03	329	unassigned	unassigned	2.09375	-4.46484	-0.743652	c2	1998NH	1.16196	NA	NA	NA	NA	NA
A/Hong Kong/CUHK18194/1998	EPI161017	EPI_ISL_14187	Asia / China	Human	1998-09-04	329	unassigned	unassigned	2.00391	-4.20312	-0.881348	c2	1998NH	0.952589	NA	NA	NA	NA	NA
A/Hong Kong/CUHK18218/1998	EPI161018	EPI_ISL_14188	Asia / China	Human	1998-09-05	329	unassigned	unassigned	2.11133	-4.46875	-0.744141	c2	1998NH	1.17327	NA	NA	NA	NA	NA
A/Hong Kong/CUHK18230/1998	EPI161019	EPI_ISL_14189	Asia / China	Human	1998-09-07	329	unassigned	unassigned	1.93652	-4.23438	-1.16406	c2	1998NH	0.707555	NA	NA	NA	NA	NA
A/Hong Kong/CUHK18351/1998	EPI161020	EPI_ISL_14190	Asia / China	Human	1998-09-10	329	unassigned	unassigned	2.11133	-4.46875	-0.744141	c2	1998NH	1.17327	NA	NA	NA	NA	NA
A/Hong Kong/CUHK18610/1998	EPI161022	EPI_ISL_14192	Asia / China	Human	1998-09-21	329	unassigned	unassigned	2.09375	-4.46484	-0.743652	c2	1998NH	1.16196	NA	NA	NA	NA	NA
A/Hong Kong/CUHK18358/1998	EPI161021	EPI_ISL_14191	Asia / China	Human	1998-09-10	329	unassigned	unassigned	0.322754	-3.76758	0.509277	c2	1998NH	2.41144	NA	NA	NA	NA	NA
A/Hong Kong/CUHK18036/1998	EPI161016	EPI_ISL_14186	Asia / China	Human	1998-08-31	329	unassigned	unassigned	1.93652	-4.23438	-1.16406	c2	1998SH	0.177128	NA	NA	NA	NA	NA
A/Hong Kong/CUHK19579/1998	EPI161024	EPI_ISL_14194	Asia / China	Human	1998-11-06	329	unassigned	unassigned	2.10547	-4.14453	-1.17285	c2	1998NH	0.831801	NA	NA	NA	NA	NA
A/Hong Kong/CUHK50552/1998	EPI161159	EPI_ISL_14195	Asia / China	Human	1998-12-21	329	unassigned	unassigned	1.84277	-4.27734	-0.822754	c2	1998NH	0.919108	NA	NA	NA	NA	NA
A/Hong Kong/CUHK50722/1998	EPI161162	EPI_ISL_14196	Asia / China	Human	1998-12-30	329	unassigned	unassigned	1.84277	-4.27734	-0.822754	c2	1998NH	0.919108	NA	NA	NA	NA	NA
A/Netherlands/462/1998	EPI367049	EPI_ISL_115620	Europe / Netherlands	Human	1998-12-16	329	unassigned	unassigned	1.79395	-3.95508	-1.13281	c2	1998NH	0.647398	NA	NA	NA	NA	NA
A/Sri Lanka/4/1998	EPI1923156	EPI_ISL_5522616	Asia / Sri Lanka	Human	1998	329	unassigned	unassigned	1.91309	-4.19922	-1.28809	c2	1997NH	0.66411	NA	NA	NA	NA	NA
A/Victoria/302/1998	EPI1885167	EPI_ISL_3492401	Oceania / Australia / Victoria / Parkville	Human	1998-03-15	329	unassigned	unassigned	1.58203	-4.23047	-0.498779	c2	1998SH	0.579322	NA	NA	NA	NA	NA
A/South Australia/41/1998	EPI1885168	EPI_ISL_3492402	Oceania / Australia / South Australia / Adelaide	Human	1998-06-25	329	unassigned	unassigned	0.450928	-3.82617	0.593262	c2	1998SH	2.16133	NA	NA	NA	NA	NA
A/Victoria/308/1998	EPI1885194	EPI_ISL_3492413	Oceania / Australia / Victoria / Coolaroo	Human	1998-05-19	329	unassigned	unassigned	1.62793	-4.45703	-0.769043	c2	1998SH	0.404974	NA	NA	NA	NA	NA
A/Victoria/308/1998	EPI1885193	EPI_ISL_3492412	Oceania / Australia / Victoria / Coolaroo	Human	1998-05-19	329	unassigned	unassigned	1.91309	-4.19922	-1.28809	c2	1998SH	0.280255	NA	NA	NA	NA	NA
A/Victoria/554/1998	EPI1885195	EPI_ISL_3492414	Oceania / Australia / Victoria	Human	1998-06-17	329	unassigned	unassigned	1.89746	-4.12891	-1.52441	c2	1998SH	0.516465	NA	NA	NA	NA	NA
A/South Australia/114/1998	EPI1885196	EPI_ISL_3492415	Oceania / Australia / South Australia / Adelaide	Human	1998-06-23	329	unassigned	unassigned	1.91309	-4.19922	-1.28809	c2	1998SH	0.280255	NA	NA	NA	NA	NA
A/Johannesburg/7/1998	EPI1885192	EPI_ISL_3492411	Africa / South Africa / ?Gauteng	Human	1998-05-06	329	unassigned	unassigned	2.23242	-3.91211	-0.90918	c2	1998SH	0.511173	NA	NA	NA	NA	NA
A/Sydney/74B/1997	EPI1885259	EPI_ISL_3492470	Oceania / Australia / New South Wales / Sydney	Human	1998	329	unassigned	unassigned	1.82129	-4.32812	-0.727539	c2	1997NH	0.0860556	NA	NA	NA	NA	NA
A/Philippines/2/1998	EPI1885254	EPI_ISL_3492466	Asia / Philippines	Human	1998-08-31	329	unassigned	unassigned	0.585938	-4.35938	-1.88281	c2	1998SH	1.52658	NA	NA	NA	NA	NA
A/Victoria/512/1998	EPI1885241	EPI_ISL_3492454	Oceania / Australia / Victoria	Human	1998-05-28	329	unassigned	unassigned	2.40039	-3.84766	-1.20117	c2	1998SH	0.697839	NA	NA	NA	NA	NA
A/Sydney/68/1998	EPI1885248	EPI_ISL_3492461	Oceania / Australia / Queensland / Brisbane	Human	1998-08-23	329	unassigned	unassigned	2.33789	-3.11133	-1.08691	c2	1998SH	1.21519	NA	NA	NA	NA	NA
A/Sydney/22/1998	EPI1885247	EPI_ISL_3492460	Oceania / Australia / New South Wales / Westmead	Human	1998-08-05	329	unassigned	unassigned	1.6543	-4.02734	-1.52734	c2	1998SH	0.572023	NA	NA	NA	NA	NA
A/Victoria/9/1998	EPI1885249	EPI_ISL_3492462	Oceania / Australia / Victoria	Human	1998-11-25	329	unassigned	unassigned	1.79004	-4.04297	-1.21387	c2	1998NH	0.566329	NA	NA	NA	NA	NA
A/Sydney/27/1998	EPI1885244	EPI_ISL_3492457	Oceania / Australia / New South Wales / Westmead	Human	1998-07-24	329	unassigned	unassigned	1.91309	-4.19922	-1.28809	c2	1998SH	0.280255	NA	NA	NA	NA	NA
A/Sydney/29/1998	EPI1885245	EPI_ISL_3492458	Oceania / Australia / New South Wales / Westmead	Human	1998-07-22	329	unassigned	unassigned	1.94043	-4.07031	-1.59082	c2	1998SH	0.599177	NA	NA	NA	NA	NA
A/Wellington/22/1998	EPI1885243	EPI_ISL_3492456	Oceania / New Zealand / Wellington / Wellington	Human	1998-05-13	329	unassigned	unassigned	1.93164	-4.28125	-1.10645	c2	1998SH	0.144686	NA	NA	NA	NA	NA
A/Victoria/605/1998	EPI1885218	EPI_ISL_3492437	Oceania / Australia / Victoria	Human	1998-06-06	329	unassigned	unassigned	1.75098	-4.20703	-1.09766	c2	1998SH	0.116501	NA	NA	NA	NA	NA
A/Victoria/525/1998	EPI1885217	EPI_ISL_3492436	Oceania / Australia / Victoria	Human	1998-06-04	329	unassigned	unassigned	1.98047	-4.26953	-1.32617	c2	1998SH	0.343387	NA	NA	NA	NA	NA
A/South Australia/115/1998	EPI1885220	EPI_ISL_3492439	Oceania / Australia / South Australia / Adelaide	Human	1998-06-23	329	unassigned	unassigned	1.77148	-4.21484	-1.08984	c2	1998SH	0.0961123	NA	NA	NA	NA	NA
A/Victoria/312/1998	EPI1885214	EPI_ISL_3492433	Oceania / Australia / Victoria / West Heidleberg	Human	1998-05-24	329	unassigned	unassigned	1.49805	-4.35938	-1.69434	c2	1998SH	0.768805	NA	NA	NA	NA	NA
A/Victoria/585/1998	EPI1885219	EPI_ISL_3492438	Oceania / Australia / Victoria	Human	1998-06-30	329	unassigned	unassigned	1.93164	-4.21094	-1.28027	c2	1998SH	0.278079	NA	NA	NA	NA	NA
A/Victoria/309/1998	EPI1885213	EPI_ISL_3492432	Oceania / Australia / Victoria / Meadow Heights	Human	1998-05-22	329	unassigned	unassigned	1.57031	-4.49219	-0.633301	c2	1998SH	0.543896	NA	NA	NA	NA	NA
B/South Australia/12/1998	EPI1885216	EPI_ISL_3492435	Oceania / Australia / South Australia / Adelaide	Human	1998	329	unassigned	unassigned	1.86719	-4.19531	-1.07422	c2	1997NH	0.451942	NA	NA	NA	NA	NA
A/Victoria/323/1998	EPI1885226	EPI_ISL_3492445	Oceania / Australia / Victoria / Collingwood	Human	1998-05-31	329	unassigned	unassigned	1.91309	-4.19922	-1.28809	c2	1998SH	0.280255	NA	NA	NA	NA	NA
A/South Australia/52/1998	EPI1885225	EPI_ISL_3492444	Oceania / Australia / South Australia / Adelaide	Human	1998-06-03	329	unassigned	unassigned	1.91309	-4.19922	-1.28809	c2	1998SH	0.280255	NA	NA	NA	NA	NA
A/Malaysia/32/1998	EPI1885227	EPI_ISL_3492446	Asia / Malaysia	Human	1998	329	unassigned	unassigned	1.94043	-4.19922	-1.26465	c2	1997NH	0.646637	NA	NA	NA	NA	NA
A/Victoria/540/1998	EPI1885222	EPI_ISL_3492441	Oceania / Australia / Victoria / Clarinda	Human	1998-06-14	329	unassigned	unassigned	1.91309	-4.19922	-1.28809	c2	1998SH	0.280255	NA	NA	NA	NA	NA
A/South Australia/132/1998	EPI1885221	EPI_ISL_3492440	Oceania / Australia / South Australia / Adelaide	Human	1998-06-30	329	unassigned	unassigned	1.91309	-4.19922	-1.28809	c2	1998SH	0.280255	NA	NA	NA	NA	NA
A/Victoria/509/1998	EPI1885223	EPI_ISL_3492442	Oceania / Australia / Victoria	Human	1998-05-26	329	unassigned	unassigned	1.75098	-4.20703	-1.09766	c2	1998SH	0.116501	NA	NA	NA	NA	NA
A/Victoria/541/1998	EPI1885224	EPI_ISL_3492443	Oceania / Australia / Victoria / Clarinda	Human	1998-06-14	329	unassigned	unassigned	1.93262	-4.21094	-1.33105	c2	1998SH	0.326535	NA	NA	NA	NA	NA
A/Victoria/318/1998	EPI1885202	EPI_ISL_3492421	Oceania / Australia / Victoria / Thornbury	Human	1998-05-28	329	unassigned	unassigned	1.93555	-4.21484	-1.26074	c2	1998SH	0.261224	NA	NA	NA	NA	NA
A/South Australia/156/1998	EPI1885204	EPI_ISL_3492423	Oceania / Australia / South Australia / Adelaide	Human	1998-06-29	329	unassigned	unassigned	1.91309	-4.19922	-1.28809	c2	1998SH	0.280255	NA	NA	NA	NA	NA
A/Victoria/556/1998	EPI1885203	EPI_ISL_3492422	Oceania / Australia / Victoria	Human	1998-06-22	329	unassigned	unassigned	1.91309	-4.19922	-1.28809	c2	1998SH	0.280255	NA	NA	NA	NA	NA
A/Auckland/2/1998	EPI1885197	EPI_ISL_3492416	Oceania / New Zealand / Auckland / Auckland	Human	1998-05-12	329	unassigned	unassigned	2.64844	-4.14062	-1.35059	c2	1998SH	0.880298	NA	NA	NA	NA	NA
A/Victoria/314/1998	EPI1885199	EPI_ISL_3492418	Oceania / Australia / Victoria / Deer Park	Human	1998-05-25	329	unassigned	unassigned	1.91309	-4.19922	-1.28809	c2	1998SH	0.280255	NA	NA	NA	NA	NA
A/Victoria/316/1998	EPI1885210	EPI_ISL_3492429	Oceania / Australia / Victoria / Delahay	Human	1998-05-28	329	unassigned	unassigned	1.81738	-4.33984	-0.931641	c2	1998SH	0.152643	NA	NA	NA	NA	NA
A/Victoria/315/1998	EPI1885212	EPI_ISL_3492431	Oceania / Australia / Victoria / Montmorency	Human	1998-05-25	329	unassigned	unassigned	1.91309	-4.19922	-1.28809	c2	1998SH	0.280255	NA	NA	NA	NA	NA
A/Victoria/507/1998	EPI1885211	EPI_ISL_3492430	Oceania / Australia / Victoria / Dandenong	Human	1998-05-21	329	unassigned	unassigned	1.91309	-4.19922	-1.28809	c2	1998SH	0.280255	NA	NA	NA	NA	NA
A/Perth/44/1998	EPI1885206	EPI_ISL_3492425	Oceania / Australia / Western Australia	Human	1998	329	unassigned	unassigned	1.87305	-4.13672	-1.35254	c2	1997NH	0.73472	NA	NA	NA	NA	NA
A/Perth/46/1998	EPI1885205	EPI_ISL_3492424	Oceania / Australia / Western Australia	Human	1998	329	unassigned	unassigned	1.87305	-4.13672	-1.35254	c2	1997NH	0.73472	NA	NA	NA	NA	NA
A/South Australia/176/1998	EPI1885207	EPI_ISL_3492426	Oceania / Australia / South Australia / Adelaide	Human	1998-07-03	329	unassigned	unassigned	1.91309	-4.19922	-1.28809	c2	1998SH	0.280255	NA	NA	NA	NA	NA
A/Victoria/605/1998	EPI116883	EPI_ISL_19097	Oceania / Australia / Victoria / Melbourne	Human	1998-06-06	329	unassigned	unassigned	2.56445	-3.70312	-1.36914	c2	1998SH	0.956944	NA	NA	NA	NA	NA
A/Malaysia/17276/1998	EPI371875	EPI_ISL_119766	Asia / Malaysia	Human	1998-05-29	329	unassigned	unassigned	1.82617	-4.17578	-1.12598	c2	1998SH	0.114769	NA	NA	NA	NA	NA
A/Malaysia/17230/1998	EPI373263	EPI_ISL_120357	Asia / Malaysia	Human	1998-05-25	329	unassigned	unassigned	1.91309	-4.19922	-1.28809	c2	1998SH	0.280255	NA	NA	NA	NA	NA
A/Malaysia/17392/1998	EPI373279	EPI_ISL_120359	Asia / Malaysia	Human	1998-06-15	329	unassigned	unassigned	1.91309	-4.19922	-1.28809	c2	1998SH	0.280255	NA	NA	NA	NA	NA
A/Malaysia/17332/1998	EPI373271	EPI_ISL_120358	Asia / Malaysia	Human	1998-06-19	329	unassigned	unassigned	1.91309	-4.19922	-1.28809	c2	1998SH	0.280255	NA	NA	NA	NA	NA
A/Malaysia/17998/1998	EPI373287	EPI_ISL_120360	Asia / Malaysia	Human	1998-08-09	329	unassigned	unassigned	0.667969	-3.99219	-1.92969	c2	1998SH	1.49828	NA	NA	NA	NA	NA
A/Malaysia/18128/1998	EPI373311	EPI_ISL_120363	Asia / Malaysia	Human	1998-09-21	329	unassigned	unassigned	0.681641	-4.00391	-1.92188	c2	1998NH	0.792892	NA	NA	NA	NA	NA
A/Malaysia/18121/1998	EPI373303	EPI_ISL_120362	Asia / Malaysia	Human	1998-09-21	329	unassigned	unassigned	0.681641	-4.00391	-1.92188	c2	1998NH	0.792892	NA	NA	NA	NA	NA
A/Shenzhen/1718/1998	EPI1886384	EPI_ISL_3692568	Asia / China / Guangdong	Human	1998	329	unassigned	unassigned	1.88184	-4.23047	-1.14258	c2	1997NH	0.512286	NA	NA	NA	NA	NA
A/Victoria/344/1998	EPI1886390	EPI_ISL_3692572	Oceania / Australia / Victoria / Parkville	Human	1998-09-22	329	unassigned	unassigned	1.625	-4.01953	-1.3418	c2	1998NH	0.371495	NA	NA	NA	NA	NA
A/Sichuan/346/1998	EPI1886273	EPI_ISL_3663396	Asia / China / Sichuan	Human	1998	329	unassigned	unassigned	2.39258	-3.34766	-0.2052	c2	1997NH	1.21705	NA	NA	NA	NA	NA
A/Fukushima/1999/1998	EPI1886245	EPI_ISL_3663376	Asia / Japan / Fukushima	Human	1998	329	unassigned	unassigned	2.24023	-3.96484	-0.769531	c2	1997NH	0.575571	NA	NA	NA	NA	NA
A/Darwin/5/1998	EPI1886239	EPI_ISL_3663371	Oceania / Australia / Northern Territory / Alice Springs	Human	1998-08-13	329	unassigned	unassigned	1.91309	-4.19922	-1.28809	c2	1998SH	0.280255	NA	NA	NA	NA	NA
A/Darwin/1/1998	EPI1886237	EPI_ISL_3663369	Oceania / Australia / Northern Territory / Darwin	Human	1998-02-22	329	unassigned	unassigned	1.82129	-4.32812	-0.727539	c2	1998SH	0.312632	NA	NA	NA	NA	NA
A/Thailand/Siriraj-08/1998	EPI336019	EPI_ISL_96128	Asia / Thailand	Human	1998	329	unassigned	unassigned	2.56445	-3.70312	-1.36914	c2	1997NH	1.21783	NA	NA	NA	NA	NA
A/Victoria/507/1998	EPI2120582	EPI_ISL_14284898	Oceania / Australia / Victoria / Dandenong	Human	1998-05-21	329	unassigned	unassigned	1.91309	-4.19922	-1.28809	c2	1998SH	0.280255	NA	NA	NA	NA	NA
A/Charlottesville/10/99	EPI8166	EPI_ISL_1771	North America / United States / Virginia	Human	1999	329	unassigned	unassigned	0.931641	-4.11328	-2.21875	c2	1998NH	0.764544	NA	NA	NA	NA	NA
A/Charlottesville/73/99	EPI8168	EPI_ISL_1772	North America / United States / Virginia	Human	1999	329	unassigned	unassigned	0.90918	-4.125	-2.20312	c2	1998NH	0.766311	NA	NA	NA	NA	NA
A/Charlottesville/49/99	EPI8170	EPI_ISL_1773	North America / United States / Virginia	Human	1999	329	unassigned	unassigned	1.19043	-4.41406	-1.55957	c2	1998NH	0.356046	NA	NA	NA	NA	NA
A/Charlottesville/69/99	EPI8172	EPI_ISL_1774	North America / United States / Virginia	Human	1999	329	unassigned	unassigned	0.930664	-4.11719	-2.20898	c2	1998NH	0.757385	NA	NA	NA	NA	NA
A/Greece/109/99	EPI8300	EPI_ISL_1833	Europe / Greece	Human	1999	329	unassigned	unassigned	1.59766	-4.03125	-1.49121	c2	1998NH	0.253716	NA	NA	NA	NA	NA
A/Hong Kong/1143/99	EPI8858	EPI_ISL_2019	Asia / Hong Kong (SAR)	Human	1999	329	unassigned	unassigned	1.91309	-4.18359	-1.50195	c2	1998NH	0.526395	NA	NA	NA	NA	NA
A/Hong Kong/1144/99	EPI8862	EPI_ISL_2020	Asia / Hong Kong (SAR)	Human	1999	329	unassigned	unassigned	1.79395	-4.08594	-1.6582	c2	1998NH	0.397303	NA	NA	NA	NA	NA
A/Hong Kong/1179/99	EPI8866	EPI_ISL_2021	Asia / Hong Kong (SAR)	Human	1999	329	unassigned	unassigned	1.89258	-4.08203	-1.68066	c2	1998NH	0.497728	NA	NA	NA	NA	NA
A/Hong Kong/1180/99	EPI8870	EPI_ISL_2022	Asia / Hong Kong (SAR)	Human	1999	329	unassigned	unassigned	1.91797	-4.37891	-1.05859	c2	1998NH	0.798605	NA	NA	NA	NA	NA
A/Hong Kong/1182/99	EPI8874	EPI_ISL_2023	Asia / Hong Kong (SAR)	Human	1999	329	unassigned	unassigned	1.91797	-4.37891	-1.05859	c2	1998NH	0.798605	NA	NA	NA	NA	NA
A/Kangwon/11/99	EPI8912	EPI_ISL_2036	Asia / Korea, Republic of	Human	1999	329	unassigned	unassigned	3.45312	-5.37109	3.16992	c1	1998NH	5.35229	NA	NA	NA	NA	NA
A/Kangwon/12/99	EPI8914	EPI_ISL_2037	Asia / Korea, Republic of	Human	1999	329	unassigned	unassigned	3.26562	-5.33594	2.88867	c1	1998NH	5.02136	NA	NA	NA	NA	NA
A/Pusan/71/99	EPI8950	EPI_ISL_2055	Asia / Korea, Republic of	Human	1999	329	unassigned	unassigned	1.84277	-4.27734	-0.822754	c2	1998NH	0.919108	NA	NA	NA	NA	NA
A/Kwangju/105/99	EPI8944	EPI_ISL_2052	Asia / Korea, Republic of	Human	1999	329	unassigned	unassigned	1.84277	-4.27734	-0.822754	c2	1998NH	0.919108	NA	NA	NA	NA	NA
A/Kwangju/115/99	EPI8946	EPI_ISL_2053	Asia / Korea, Republic of	Human	1999	329	unassigned	unassigned	1.95703	-4.17969	-1.29785	c2	1998NH	0.641752	NA	NA	NA	NA	NA
A/Kwangju/117/99	EPI8948	EPI_ISL_2054	Asia / Korea, Republic of	Human	1999	329	unassigned	unassigned	1.95703	-4.17969	-1.29785	c2	1998NH	0.641752	NA	NA	NA	NA	NA
A/Inchon/81/99	EPI8952	EPI_ISL_2056	Asia / Korea, Republic of / Incheon / Inch''on	Human	1999	329	unassigned	unassigned	1.8125	-4.30469	-0.817871	c2	1998NH	0.91399	NA	NA	NA	NA	NA
A/Finland/620/99	EPI347441	EPI_ISL_100405	Europe / Finland	Human	1999-01-15	329	unassigned	unassigned	1.61035	-3.9043	-1.87598	c2	1998NH	0.404251	NA	NA	NA	NA	NA
A/Virginia/21716/99	EPI9831	EPI_ISL_2196	North America / United States / Virginia	Human	1999	329	unassigned	unassigned	0.931641	-4.11328	-2.21875	c2	1998NH	0.764544	NA	NA	NA	NA	NA
A/Canada/33312/99	EPI9833	EPI_ISL_2197	North America / Canada	Human	1999	329	unassigned	unassigned	0.930664	-4.11719	-2.20898	c2	1998NH	0.757385	NA	NA	NA	NA	NA
A/Virginia/21833/99	EPI9835	EPI_ISL_2198	North America / United States / Virginia	Human	1999	329	unassigned	unassigned	0.930664	-4.11719	-2.20898	c2	1998NH	0.757385	NA	NA	NA	NA	NA
A/Michigan/22692/99	EPI9837	EPI_ISL_2199	North America / United States / Michigan	Human	1999	329	unassigned	unassigned	1.86328	-4.25391	-0.907227	c2	1998NH	0.854495	NA	NA	NA	NA	NA
A/Virginia/21754/99	EPI9839	EPI_ISL_2200	North America / United States / Virginia	Human	1999	329	unassigned	unassigned	0.930664	-4.11719	-2.20898	c2	1998NH	0.757385	NA	NA	NA	NA	NA
A/Virginia/21822/99	EPI9841	EPI_ISL_2201	North America / United States / Virginia	Human	1999	329	unassigned	unassigned	0.930664	-4.11719	-2.20898	c2	1998NH	0.757385	NA	NA	NA	NA	NA
A/Virginia/G1/99	EPI9843	EPI_ISL_2202	North America / United States / Virginia	Human	1999	329	unassigned	unassigned	0.921387	-4.13281	-2.2207	c2	1998NH	0.772164	NA	NA	NA	NA	NA
A/Virginia/21817/99	EPI9851	EPI_ISL_2206	North America / United States / Virginia	Human	1999	329	unassigned	unassigned	1.46777	-4.28906	-1.34961	c2	1998NH	0.315768	NA	NA	NA	NA	NA
A/Virginia/21845/99	EPI9845	EPI_ISL_2203	North America / United States / Virginia	Human	1999	329	unassigned	unassigned	0.927246	-4.10547	-2.31445	c2	1998NH	0.844723	NA	NA	NA	NA	NA
A/Virginia/21799/99	EPI9847	EPI_ISL_2204	North America / United States / Virginia	Human	1999	329	unassigned	unassigned	0.930664	-4.11719	-2.20898	c2	1998NH	0.757385	NA	NA	NA	NA	NA
A/Virginia/21743/99	EPI9849	EPI_ISL_2205	North America / United States / Virginia	Human	1999	329	unassigned	unassigned	1.49316	-3.95508	-1.80078	c2	1998NH	0.272329	NA	NA	NA	NA	NA
A/Pennsalvanya/20109/99	EPI9853	EPI_ISL_2207	North America / United States / Pennsylvania	Human	1999	329	unassigned	unassigned	1.89258	-4.08203	-1.68066	c2	1998NH	0.497728	NA	NA	NA	NA	NA
A/United Kingdom/34300/99	EPI9855	EPI_ISL_2208	Europe / United Kingdom	Human	1999	329	unassigned	unassigned	0.75	-4.17578	-2.19336	c2	1998NH	0.87164	NA	NA	NA	NA	NA
A/Virginia/21828/99	EPI9857	EPI_ISL_2209	North America / United States / Virginia	Human	1999	329	unassigned	unassigned	0.90918	-4.125	-2.20312	c2	1998NH	0.766311	NA	NA	NA	NA	NA
A/United Kingdom/26554/99	EPI9859	EPI_ISL_2210	Europe / United Kingdom	Human	1999	329	unassigned	unassigned	0.930664	-4.11719	-2.20898	c2	1998NH	0.757385	NA	NA	NA	NA	NA
A/Virginia/21735/99	EPI9861	EPI_ISL_2211	North America / United States / Virginia	Human	1999	329	unassigned	unassigned	0.923828	-4.10547	-2.20117	c2	1998NH	0.755928	NA	NA	NA	NA	NA
A/Michigan/22568/99	EPI9863	EPI_ISL_2212	North America / United States / Michigan	Human	1999	329	unassigned	unassigned	1.78809	-4.11719	-1.60645	c2	1998NH	0.38683	NA	NA	NA	NA	NA
A/Virginia/21712/99	EPI9865	EPI_ISL_2213	North America / United States / Virginia	Human	1999	329	unassigned	unassigned	1.84277	-4.27734	-0.822754	c2	1998NH	0.919108	NA	NA	NA	NA	NA
A/Utah/20997/99	EPI9867	EPI_ISL_2214	North America / United States / Utah	Human	1999	329	unassigned	unassigned	1.8125	-4.30469	-0.817871	c2	1998NH	0.91399	NA	NA	NA	NA	NA
A/Indiana/28170/99	EPI9869	EPI_ISL_2215	North America / United States / Indiana	Human	1999	329	unassigned	unassigned	1.89258	-4.08203	-1.68066	c2	1998NH	0.497728	NA	NA	NA	NA	NA
A/Virginia/21847/99	EPI9871	EPI_ISL_2216	North America / United States / Virginia	Human	1999	329	unassigned	unassigned	0.967773	-4.46484	-1.8252	c2	1998NH	0.58486	NA	NA	NA	NA	NA
A/Panama/2007/1999	EPI160202	EPI_ISL_2674	North America / Panama	Human	1999	329	unassigned	unassigned	2.0332	-3.60547	-1.87988	c2	1998NH	0.864159	NA	NA	NA	NA	NA
A/Moscow/10/99	EPI123022	EPI_ISL_2695	Europe / Russian Federation / Moscow	Human	1999	329	unassigned	unassigned	2.00195	-4.04297	-1.83496	c2	1998NH	0.645228	NA	NA	NA	NA	NA
A/Oslo/3161/99	EPI238386	EPI_ISL_68486	Europe / Norway	Human	1999-12-08	329	unassigned	unassigned	1.35742	-3.86914	-2	c2	1999NH	0.207977	NA	NA	NA	NA	NA
A/Oslo/841/2000	EPI238389	EPI_ISL_68489	Europe / Norway	Human	1999-12-28	329	unassigned	unassigned	1.35742	-3.86914	-2	c2	1999NH	0.207977	NA	NA	NA	NA	NA
A/zhejiang/06/99	EPI15295	EPI_ISL_3111	Asia / China / Zhejiang Province	Human	1999	329	unassigned	unassigned	1.89258	-4.08203	-1.68066	c2	1998NH	0.497728	NA	NA	NA	NA	NA
A/Townsville/2/1999	EPI545312	EPI_ISL_167274	Oceania / Australia	Human	1999	329	unassigned	unassigned	1.37305	-3.97266	-2.05859	c2	1998NH	0.471548	NA	NA	NA	NA	NA
A/Christchurch/68/1999	EPI545313	EPI_ISL_167275	Oceania / New Zealand	Human	1999	329	unassigned	unassigned	1.35742	-3.86914	-2	c2	1998NH	0.467986	NA	NA	NA	NA	NA
A/Panama/2007/1999	EPI545315	EPI_ISL_167277	North America / Panama	Human	1999	329	unassigned	unassigned	0.577637	-3.63672	-1.74707	c2	1998NH	0.970897	NA	NA	NA	NA	NA
A/Netherlands/301/99	EPI23830	EPI_ISL_4240	Europe / Netherlands	Human	1999	329	unassigned	unassigned	0.75	-4.17578	-2.19336	c2	1998NH	0.87164	NA	NA	NA	NA	NA
A/Fujian/137/1999	EPI26546	EPI_ISL_4880	Asia / China / Fujian Province	Human	1999	329	unassigned	unassigned	2.37891	-3.69336	-1.62109	c2	1998NH	1.0716	NA	NA	NA	NA	NA
A/Zhangzhou/51/1999	EPI26569	EPI_ISL_4892	Asia / China / Fujian Province / Zhangzhou	Human	1999	329	unassigned	unassigned	2.46484	-3.64258	-1.64355	c2	1998NH	1.17117	NA	NA	NA	NA	NA
A/Fujian/134/1999	EPI26571	EPI_ISL_4893	Asia / China / Fujian Province	Human	1999	329	unassigned	unassigned	1.79883	-4.28906	-1.63672	c2	1998NH	0.427146	NA	NA	NA	NA	NA
A/RioGdoSul/21/99	EPI26582	EPI_ISL_4897	South America / Brazil	Human	1999	329	unassigned	unassigned	1.1377	-4.08594	-2.29492	c2	1998NH	0.729871	NA	NA	NA	NA	NA
A/EspiritoSanto/33/99	EPI26586	EPI_ISL_4899	South America / Brazil / Estado do Rio Grande do Norte / Espirito Santo	Human	1999	329	unassigned	unassigned	0.766602	-4.52344	-1.80859	c2	1998NH	0.769911	NA	NA	NA	NA	NA
A/EspiritoSanto/14/99	EPI26580	EPI_ISL_4896	South America / Brazil / Estado do Rio Grande do Norte / Espirito Santo	Human	1999	329	unassigned	unassigned	0.75	-4.17578	-2.19336	c2	1998NH	0.87164	NA	NA	NA	NA	NA
A/RioGdoSul/25/99	EPI26584	EPI_ISL_4898	South America / Brazil	Human	1999	329	unassigned	unassigned	0.699707	-4.07812	-2.05469	c2	1998NH	0.829562	NA	NA	NA	NA	NA
A/New York/149/1999	EPI27966	EPI_ISL_5049	North America / United States / New York	Human	1999-11-29	329	unassigned	unassigned	1.35742	-3.86914	-2	c2	1999NH	0.207977	NA	NA	NA	NA	NA
A/New York/151/1999	EPI28308	EPI_ISL_5067	North America / United States / New York	Human	1999-12-04	329	unassigned	unassigned	1.33203	-3.87891	-1.96582	c2	1999NH	0.181968	NA	NA	NA	NA	NA
A/New York/147/1999	EPI28289	EPI_ISL_5066	North America / United States / New York	Human	1999-11-23	329	unassigned	unassigned	1.35742	-3.86914	-2	c2	1999NH	0.207977	NA	NA	NA	NA	NA
A/New York/161/1999	EPI28346	EPI_ISL_5069	North America / United States / New York	Human	1999-12-16	329	unassigned	unassigned	1.35742	-3.86914	-2	c2	1999NH	0.207977	NA	NA	NA	NA	NA
A/New York/143/1999	EPI28384	EPI_ISL_5071	North America / United States / New York	Human	1999-11-26	329	unassigned	unassigned	1.35742	-3.85547	-2.08789	c2	1999NH	0.234042	NA	NA	NA	NA	NA
A/New York/163/1999	EPI28403	EPI_ISL_5072	North America / United States / New York	Human	1999-12-22	329	unassigned	unassigned	1.35742	-3.86914	-2	c2	1999NH	0.207977	NA	NA	NA	NA	NA
A/New York/167/1999	EPI28422	EPI_ISL_5073	North America / United States / New York	Human	1999-12-30	329	unassigned	unassigned	1.35742	-3.86914	-2	c2	1999NH	0.207977	NA	NA	NA	NA	NA
A/New York/171/1999	EPI28479	EPI_ISL_5076	North America / United States / New York	Human	1999-12-30	329	unassigned	unassigned	1.35742	-3.86914	-2	c2	1999NH	0.207977	NA	NA	NA	NA	NA
A/New York/172/1999	EPI28498	EPI_ISL_5077	North America / United States / New York	Human	1999-12-26	329	unassigned	unassigned	1.34473	-3.87305	-2	c2	1999NH	0.19505	NA	NA	NA	NA	NA
A/Canterbury/179/1999	EPI29158	EPI_ISL_5112	Oceania / New Zealand / Canterbury	Human	1999-12-17	329	unassigned	unassigned	1.35742	-3.86914	-2	c2	1999NH	0.207977	NA	NA	NA	NA	NA
A/Sao Paulo/121/1999	EPI843282	EPI_ISL_235405	South America / Brazil	Human	1999-07-29	329	unassigned	unassigned	0.75	-4.17578	-2.19336	c2	1999SH	0.678247	NA	NA	NA	NA	NA
A/New South Wales/13/1999	EPI45468	EPI_ISL_6222	Oceania / Australia / New South Wales / Sydney	Human	1999	329	unassigned	unassigned	0.922363	-4.11719	-2.20508	c2	1998NH	0.759542	NA	NA	NA	NA	NA
A/New South Wales/20/1999	EPI45487	EPI_ISL_6223	Oceania / Australia / New South Wales / Sydney	Human	1999	329	unassigned	unassigned	0.75	-4.17578	-2.19336	c2	1998NH	0.87164	NA	NA	NA	NA	NA
A/New South Wales/2/1999	EPI46459	EPI_ISL_6347	Oceania / Australia / New South Wales / Sydney	Human	1999	329	unassigned	unassigned	0.922363	-4.11719	-2.20508	c2	1998NH	0.759542	NA	NA	NA	NA	NA
A/New South Wales/5/1999	EPI46478	EPI_ISL_6348	Oceania / Australia / New South Wales / Sydney	Human	1999	329	unassigned	unassigned	1.78613	-4.07031	-1.61621	c2	1998NH	0.389523	NA	NA	NA	NA	NA
A/New South Wales/6/1999	EPI46497	EPI_ISL_6349	Oceania / Australia / New South Wales / Sydney	Human	1999	329	unassigned	unassigned	1.33691	-3.93359	-1.78223	c2	1998NH	0.267579	NA	NA	NA	NA	NA
A/New South Wales/8/1999	EPI46516	EPI_ISL_6350	Oceania / Australia / New South Wales / Sydney	Human	1999	329	unassigned	unassigned	1.33691	-3.93359	-1.78223	c2	1998NH	0.267579	NA	NA	NA	NA	NA
A/New South Wales/15/1999	EPI46535	EPI_ISL_6351	Oceania / Australia / New South Wales / Sydney	Human	1999	329	unassigned	unassigned	1.35742	-3.86914	-2	c2	1998NH	0.467986	NA	NA	NA	NA	NA
A/New South Wales/16/1999	EPI46554	EPI_ISL_6352	Oceania / Australia / New South Wales / Sydney	Human	1999	329	unassigned	unassigned	0.930664	-4.11719	-2.20898	c2	1998NH	0.757385	NA	NA	NA	NA	NA
A/New South Wales/21/1999	EPI46573	EPI_ISL_6353	Oceania / Australia / New South Wales / Sydney	Human	1999	329	unassigned	unassigned	0.776367	-4.14453	-2.23828	c2	1998NH	0.882198	NA	NA	NA	NA	NA
A/New South Wales/17/1999	EPI46763	EPI_ISL_6363	Oceania / Australia / New South Wales / Sydney	Human	1999	329	unassigned	unassigned	1.33789	-3.97656	-1.89648	c2	1998NH	0.327397	NA	NA	NA	NA	NA
A/New South Wales/22/1999	EPI46801	EPI_ISL_6365	Oceania / Australia / New South Wales / Sydney	Human	1999	329	unassigned	unassigned	1.24121	-3.86133	-1.47559	c2	1998NH	0.345499	NA	NA	NA	NA	NA
A/New South Wales/4/1999	EPI46744	EPI_ISL_6362	Oceania / Australia / New South Wales / Sydney	Human	1999	329	unassigned	unassigned	1.89258	-4.08203	-1.68066	c2	1998NH	0.497728	NA	NA	NA	NA	NA
A/New York/177/1999	EPI52226	EPI_ISL_6631	North America / United States / New York	Human	1999-10-25	329	unassigned	unassigned	0.75	-4.17578	-2.19336	c2	1999NH	0.536886	NA	NA	NA	NA	NA
A/New York/179/1999	EPI52245	EPI_ISL_6632	North America / United States / New York	Human	1999-11-24	329	unassigned	unassigned	1.35742	-3.77734	-1.88184	c2	1999NH	0.254785	NA	NA	NA	NA	NA
A/New York/185/1999	EPI52283	EPI_ISL_6634	North America / United States / New York	Human	1999-12-25	329	unassigned	unassigned	1.35742	-3.86914	-2	c2	1999NH	0.207977	NA	NA	NA	NA	NA
A/New York/141/1999	EPI52416	EPI_ISL_6641	North America / United States / New York	Human	1999-11-09	329	unassigned	unassigned	1.39844	-3.79102	-1.97363	c2	1999NH	0.26582	NA	NA	NA	NA	NA
A/New York/166/1999	EPI52435	EPI_ISL_6642	North America / United States / New York	Human	1999-12-24	329	unassigned	unassigned	1.35742	-3.86914	-2	c2	1999NH	0.207977	NA	NA	NA	NA	NA
A/New York/186/1999	EPI52549	EPI_ISL_6648	North America / United States / New York	Human	1999-12-24	329	unassigned	unassigned	1.33789	-3.84961	-1.83984	c2	1999NH	0.238101	NA	NA	NA	NA	NA
A/New York/138/1999	EPI52852	EPI_ISL_6663	North America / United States / New York	Human	1999-10-03	329	unassigned	unassigned	0.78418	-4.16797	-2.19727	c2	1999NH	0.509143	NA	NA	NA	NA	NA
A/New York/189/1999	EPI52890	EPI_ISL_6665	North America / United States / New York	Human	1999-12-20	329	unassigned	unassigned	1.35742	-3.86914	-2	c2	1999NH	0.207977	NA	NA	NA	NA	NA
A/New York/137/1999	EPI53163	EPI_ISL_6678	North America / United States / New York	Human	1999-10-04	329	unassigned	unassigned	0.78418	-4.16797	-2.19727	c2	1999NH	0.509143	NA	NA	NA	NA	NA
A/New York/181/1999	EPI53296	EPI_ISL_6685	North America / United States / New York	Human	1999-12-05	329	unassigned	unassigned	1.35742	-3.86914	-2	c2	1999NH	0.207977	NA	NA	NA	NA	NA
A/New York/164/1999	EPI53517	EPI_ISL_6696	North America / United States / New York	Human	1999-12-27	329	unassigned	unassigned	1.33398	-3.87305	-2.00391	c2	1999NH	0.184802	NA	NA	NA	NA	NA
A/New York/139/1999	EPI53707	EPI_ISL_6706	North America / United States / New York	Human	1999-12-04	329	unassigned	unassigned	1.33203	-3.87891	-1.96582	c2	1999NH	0.181968	NA	NA	NA	NA	NA
A/New York/183/1999	EPI53726	EPI_ISL_6707	North America / United States / New York	Human	1999-12-01	329	unassigned	unassigned	1.35742	-3.86914	-2	c2	1999NH	0.207977	NA	NA	NA	NA	NA
A/New York/145/1999	EPI53783	EPI_ISL_6710	North America / United States / New York	Human	1999-11-09	329	unassigned	unassigned	0.769531	-4.07422	-2.13672	c2	1999NH	0.451775	NA	NA	NA	NA	NA
A/New York/263/1999	EPI53840	EPI_ISL_6713	North America / United States / New York	Human	1999-02-10	329	unassigned	unassigned	1.46777	-4.28906	-1.34961	c2	1999SH	0.596412	NA	NA	NA	NA	NA
A/New York/155/1999	EPI53916	EPI_ISL_6717	North America / United States / New York	Human	1999-12-07	329	unassigned	unassigned	1.35742	-3.77734	-1.88184	c2	1999NH	0.254785	NA	NA	NA	NA	NA
A/New York/184/1999	EPI53935	EPI_ISL_6718	North America / United States / New York	Human	1999-12-20	329	unassigned	unassigned	1.35742	-3.77734	-1.88184	c2	1999NH	0.254785	NA	NA	NA	NA	NA
A/New York/253/1999	EPI54221	EPI_ISL_6733	North America / United States / New York	Human	1999-03-26	329	unassigned	unassigned	0.930664	-4.11719	-2.20898	c2	1999SH	0.527829	NA	NA	NA	NA	NA
A/New York/259/1999	EPI54259	EPI_ISL_6735	North America / United States / New York	Human	1999-02-02	329	unassigned	unassigned	0.930664	-4.11719	-2.20898	c2	1999SH	0.527829	NA	NA	NA	NA	NA
A/New York/262/1999	EPI54278	EPI_ISL_6736	North America / United States / New York	Human	1999-01-25	329	unassigned	unassigned	0.930664	-4.11719	-2.20898	c2	1998NH	0.757385	NA	NA	NA	NA	NA
A/New York/264/1999	EPI54297	EPI_ISL_6737	North America / United States / New York	Human	1999-03-03	329	unassigned	unassigned	0.930664	-4.11719	-2.20898	c2	1999SH	0.527829	NA	NA	NA	NA	NA
A/New York/265/1999	EPI54316	EPI_ISL_6738	North America / United States / New York	Human	1999-01-29	329	unassigned	unassigned	1.84277	-4.27734	-0.822754	c2	1998NH	0.919108	NA	NA	NA	NA	NA
A/New York/284/1999	EPI54411	EPI_ISL_6743	North America / United States / New York	Human	1999-03-08	329	unassigned	unassigned	1.25977	-4.01172	-1.72461	c2	1999SH	0.180221	NA	NA	NA	NA	NA
A/New York/286/1999	EPI54430	EPI_ISL_6744	North America / United States / New York	Human	1999-03-19	329	unassigned	unassigned	0.930664	-4.11719	-2.20898	c2	1999SH	0.527829	NA	NA	NA	NA	NA
A/New York/255/1999	EPI54506	EPI_ISL_6748	North America / United States / New York	Human	1999-02-10	329	unassigned	unassigned	0.930664	-4.11719	-2.20898	c2	1999SH	0.527829	NA	NA	NA	NA	NA
A/New York/257/1999	EPI54525	EPI_ISL_6749	North America / United States / New York	Human	1999-02-03	329	unassigned	unassigned	0.930664	-4.11719	-2.20898	c2	1999SH	0.527829	NA	NA	NA	NA	NA
A/New South Wales/7/1999	EPI57593	EPI_ISL_6873	Oceania / Australia / New South Wales / Sydney	Human	1999	329	unassigned	unassigned	1.33691	-3.93359	-1.78223	c2	1998NH	0.267579	NA	NA	NA	NA	NA
A/New South Wales/19/1999	EPI57612	EPI_ISL_6874	Oceania / Australia / New South Wales / Sydney	Human	1999	329	unassigned	unassigned	1.35742	-3.86914	-2	c2	1998NH	0.467986	NA	NA	NA	NA	NA
A/Philippines/109/1999	EPI1919296	EPI_ISL_5054177	Asia / Philippines	Human	1999	329	unassigned	unassigned	1.83203	-4.08984	-1.65039	c2	1998NH	0.433853	NA	NA	NA	NA	NA
A/Christchurch/179/1999	EPI1919332	EPI_ISL_5054202	Oceania / New Zealand / Canterbury / Christchurch	Human	1999-12-17	329	unassigned	unassigned	1.35742	-3.86914	-2	c2	1999NH	0.207977	NA	NA	NA	NA	NA
A/Netherlands/00301/1999	EPI3616398	EPI_ISL_19505045	Europe / Netherlands	Human	1999-10-01	329	unassigned	unassigned	0.75	-4.17578	-2.19336	c2	1999NH	0.536886	NA	NA	NA	NA	NA
A/Victoria/596/1999	EPI1919462	EPI_ISL_5054286	Oceania / Australia / Victoria / Noble Park	Human	1999-08-11	329	unassigned	unassigned	1.30176	-4.00781	-1.89648	c2	1999SH	0.0595513	NA	NA	NA	NA	NA
A/Lyon/1670/1999	EPI1919357	EPI_ISL_5054215	Europe / France	Human	1999	329	unassigned	unassigned	0.816895	-4.14453	-2.16797	c2	1998NH	0.804165	NA	NA	NA	NA	NA
A/Yamagata/1128/1999	EPI1919464	EPI_ISL_5054288	Asia / Japan / Yamagata / Yamagata	Human	1999	329	unassigned	unassigned	-2.0918	-3.96094	-2.21484	c3	1998NH	3.54862	NA	NA	NA	NA	NA
A/South Australia/147/1999	EPI1919402	EPI_ISL_5054248	Oceania / Australia / South Australia / Adelaide	Human	1999-08-28	329	unassigned	unassigned	1.35742	-3.86914	-2	c2	1999SH	0.218325	NA	NA	NA	NA	NA
A/Singapore/94/1999	EPI1919399	EPI_ISL_5054245	Asia / Singapore	Human	1999-11-29	329	unassigned	unassigned	0.817383	-4.12109	-2.32617	c2	1999NH	0.532842	NA	NA	NA	NA	NA
A/South Australia/115/1999	EPI1919401	EPI_ISL_5054247	Oceania / Australia / South Australia	Human	1999	329	unassigned	unassigned	1.89258	-4.08203	-1.68066	c2	1998NH	0.497728	NA	NA	NA	NA	NA
A/Singapore/96/1999	EPI1919400	EPI_ISL_5054246	Asia / Singapore	Human	1999-12-03	329	unassigned	unassigned	1.35059	-3.85547	-2.00391	c2	1999NH	0.203301	NA	NA	NA	NA	NA
A/Singapore/72/1999	EPI1919397	EPI_ISL_5054243	Asia / Singapore	Human	1999-09-27	329	unassigned	unassigned	0.935547	-4.12109	-2.16016	c2	1999NH	0.363926	NA	NA	NA	NA	NA
A/Singapore/67/1999	EPI1919395	EPI_ISL_5054241	Asia / Singapore	Human	1999-09-23	329	unassigned	unassigned	2.05273	-2.79883	-1.48242	c2	1999NH	1.49966	NA	NA	NA	NA	NA
A/Singapore/69/1999	EPI1919396	EPI_ISL_5054242	Asia / Singapore	Human	1999-09-23	329	unassigned	unassigned	1.37695	-3.91211	-2	c2	1999NH	0.227894	NA	NA	NA	NA	NA
A/Tehran/14/1999	EPI1919432	EPI_ISL_5054269	Asia / Iran, Islamic Republic of / Ostan-e Tehran / Tehran	Human	1999-12-27	329	unassigned	unassigned	2.23633	-3.42578	-1.74414	c2	1999NH	1.20338	NA	NA	NA	NA	NA
A/Taiwan/9/1999	EPI1919430	EPI_ISL_5054268	Asia / Taiwan	Human	1999-10-19	329	unassigned	unassigned	0.899902	-4.13281	-2.20312	c2	1999NH	0.414491	NA	NA	NA	NA	NA
A/Taiwan/3/1999	EPI1919427	EPI_ISL_5054265	Asia / Taiwan	Human	1999-09-02	329	unassigned	unassigned	1.13867	-4.08594	-2.19922	c2	1999NH	0.293955	NA	NA	NA	NA	NA
A/New York/280/1999	EPI78286	EPI_ISL_8157	North America / United States / New York	Human	1999-04-12	329	unassigned	unassigned	0.930664	-4.11719	-2.20898	c2	1999SH	0.527829	NA	NA	NA	NA	NA
A/New York/279/1999	EPI78267	EPI_ISL_8156	North America / United States / New York	Human	1999-02-23	329	unassigned	unassigned	0.930664	-4.11719	-2.20898	c2	1999SH	0.527829	NA	NA	NA	NA	NA
A/New York/277/1999	EPI78248	EPI_ISL_8155	North America / United States / New York	Human	1999-01-08	329	unassigned	unassigned	1.91309	-4.19922	-1.28809	c2	1998NH	0.611131	NA	NA	NA	NA	NA
A/New York/282/1999	EPI78305	EPI_ISL_8158	North America / United States / New York	Human	1999-02-11	329	unassigned	unassigned	0.50293	-4.46875	-2.14062	c2	1999SH	0.969928	NA	NA	NA	NA	NA
A/New York/288/1999	EPI78324	EPI_ISL_8159	North America / United States / New York	Human	1999-02-26	329	unassigned	unassigned	0.92627	-4.10547	-2.21289	c2	1999SH	0.532341	NA	NA	NA	NA	NA
A/New York/290/1999	EPI78362	EPI_ISL_8161	North America / United States / New York	Human	1999-02-17	329	unassigned	unassigned	0.930664	-4.11719	-2.20898	c2	1999SH	0.527829	NA	NA	NA	NA	NA
A/New York/311/1999	EPI78400	EPI_ISL_8163	North America / United States / New York	Human	1999-03-01	329	unassigned	unassigned	0.919434	-4.125	-2.19727	c2	1999SH	0.530522	NA	NA	NA	NA	NA
A/New York/314/1999	EPI78438	EPI_ISL_8165	North America / United States / New York	Human	1999-02-03	329	unassigned	unassigned	0.930664	-4.11719	-2.20898	c2	1999SH	0.527829	NA	NA	NA	NA	NA
A/New York/317/1999	EPI78476	EPI_ISL_8167	North America / United States / New York	Human	1999-01-04	329	unassigned	unassigned	0.930664	-4.11719	-2.20898	c2	1998NH	0.757385	NA	NA	NA	NA	NA
A/New York/315/1999	EPI78457	EPI_ISL_8166	North America / United States / New York	Human	1999-01-06	329	unassigned	unassigned	1.84277	-4.27734	-0.822754	c2	1998NH	0.919108	NA	NA	NA	NA	NA
A/New York/320/1999	EPI78514	EPI_ISL_8169	North America / United States / New York	Human	1999-03-26	329	unassigned	unassigned	0.930664	-4.11719	-2.20898	c2	1999SH	0.527829	NA	NA	NA	NA	NA
A/New York/318/1999	EPI78495	EPI_ISL_8168	North America / United States / New York	Human	1999-02-02	329	unassigned	unassigned	0.930664	-4.11719	-2.20898	c2	1999SH	0.527829	NA	NA	NA	NA	NA
A/New York/321/1999	EPI78533	EPI_ISL_8170	North America / United States / New York	Human	1999-01-17	329	unassigned	unassigned	0.941895	-4.10156	-2.2207	c2	1998NH	0.760232	NA	NA	NA	NA	NA
A/New York/323/1999	EPI78552	EPI_ISL_8171	North America / United States / New York	Human	1999-01-25	329	unassigned	unassigned	0.930664	-4.11719	-2.20898	c2	1998NH	0.757385	NA	NA	NA	NA	NA
A/New York/327/1999	EPI78571	EPI_ISL_8172	North America / United States / New York	Human	1999-03-24	329	unassigned	unassigned	0.797852	-3.93945	-2.23633	c2	1999SH	0.657032	NA	NA	NA	NA	NA
A/New York/329/1999	EPI78590	EPI_ISL_8173	North America / United States / New York	Human	1999-02-01	329	unassigned	unassigned	0.930664	-4.11719	-2.20898	c2	1999SH	0.527829	NA	NA	NA	NA	NA
A/New York/333/1999	EPI78609	EPI_ISL_8174	North America / United States / New York	Human	1999-02-16	329	unassigned	unassigned	0.930664	-4.11719	-2.20898	c2	1999SH	0.527829	NA	NA	NA	NA	NA
A/New York/336/1999	EPI78647	EPI_ISL_8176	North America / United States / New York	Human	1999-02-24	329	unassigned	unassigned	1.89746	-4.12891	-1.52441	c2	1999SH	0.667069	NA	NA	NA	NA	NA
A/New York/335/1999	EPI78628	EPI_ISL_8175	North America / United States / New York	Human	1999-01-20	329	unassigned	unassigned	1.58594	-4.25781	-1.37305	c2	1998NH	0.329504	NA	NA	NA	NA	NA
A/New York/337/1999	EPI78666	EPI_ISL_8177	North America / United States / New York	Human	1999-03-08	329	unassigned	unassigned	1.25977	-4.01172	-1.72461	c2	1999SH	0.180221	NA	NA	NA	NA	NA
A/New York/338/1999	EPI78685	EPI_ISL_8178	North America / United States / New York	Human	1999-02-08	329	unassigned	unassigned	0.930664	-4.11719	-2.20898	c2	1999SH	0.527829	NA	NA	NA	NA	NA
A/New York/340/1999	EPI78704	EPI_ISL_8179	North America / United States / New York	Human	1999-01-23	329	unassigned	unassigned	0.930664	-4.11719	-2.20898	c2	1998NH	0.757385	NA	NA	NA	NA	NA
A/New York/260/1999	EPI78761	EPI_ISL_8182	North America / United States / New York	Human	1999-02-11	329	unassigned	unassigned	0.930664	-4.11719	-2.20898	c2	1999SH	0.527829	NA	NA	NA	NA	NA
A/New York/278/1999	EPI78780	EPI_ISL_8183	North America / United States / New York	Human	1999-02-04	329	unassigned	unassigned	1.4873	-4.32422	-1.33203	c2	1999SH	0.630912	NA	NA	NA	NA	NA
A/New York/324/1999	EPI78799	EPI_ISL_8184	North America / United States / New York	Human	1999-01-26	329	unassigned	unassigned	1.81934	-4.28906	-0.815918	c2	1998NH	0.915994	NA	NA	NA	NA	NA
A/New York/331/1999	EPI78818	EPI_ISL_8185	North America / United States / New York	Human	1999-01-28	329	unassigned	unassigned	0.930664	-4.11719	-2.20898	c2	1998NH	0.757385	NA	NA	NA	NA	NA
A/New York/332/1999	EPI78837	EPI_ISL_8186	North America / United States / New York	Human	1999-02-17	329	unassigned	unassigned	0.910156	-4.12109	-2.20898	c2	1999SH	0.544345	NA	NA	NA	NA	NA
A/Memphis/59/1999	EPI79122	EPI_ISL_8200	North America / United States / Tennessee	Human	1999	329	unassigned	unassigned	0.760254	-4.17969	-2.08984	c2	1998NH	0.798782	NA	NA	NA	NA	NA
A/New York/285/1999	EPI79198	EPI_ISL_8204	North America / United States / New York	Human	1999-01-25	329	unassigned	unassigned	0.930664	-4.11719	-2.20898	c2	1998NH	0.757385	NA	NA	NA	NA	NA
A/New York/283/1999	EPI79179	EPI_ISL_8203	North America / United States / New York	Human	1999-02-12	329	unassigned	unassigned	1.91309	-4.19922	-1.28809	c2	1999SH	0.838488	NA	NA	NA	NA	NA
A/New York/322/1999	EPI79255	EPI_ISL_8207	North America / United States / New York	Human	1999-03-18	329	unassigned	unassigned	0.930664	-4.11719	-2.20898	c2	1999SH	0.527829	NA	NA	NA	NA	NA
A/New York/316/1999	EPI79236	EPI_ISL_8206	North America / United States / New York	Human	1999-01-26	329	unassigned	unassigned	1.45215	-4.28125	-1.3457	c2	1998NH	0.312427	NA	NA	NA	NA	NA
A/New York/347/1999	EPI79559	EPI_ISL_8223	North America / United States / New York	Human	1999-01-19	329	unassigned	unassigned	0.930664	-4.11719	-2.20898	c2	1998NH	0.757385	NA	NA	NA	NA	NA
A/New York/398/1999	EPI79578	EPI_ISL_8224	North America / United States / New York	Human	1999-03-24	329	unassigned	unassigned	0.960938	-4.17969	-2.06836	c2	1999SH	0.441053	NA	NA	NA	NA	NA
A/New York/153/1999	EPI79597	EPI_ISL_8225	North America / United States / New York	Human	1999-12-09	329	unassigned	unassigned	1.34473	-3.87305	-2	c2	1999NH	0.19505	NA	NA	NA	NA	NA
A/New York/266/1999	EPI79635	EPI_ISL_8227	North America / United States / New York	Human	1999-05-06	329	unassigned	unassigned	0.930664	-4.11719	-2.20898	c2	1999SH	0.527829	NA	NA	NA	NA	NA
A/New York/325/1999	EPI79711	EPI_ISL_8231	North America / United States / New York	Human	1999-02-26	329	unassigned	unassigned	0.92627	-4.10547	-2.21289	c2	1999SH	0.532341	NA	NA	NA	NA	NA
A/New York/140/1999	EPI80053	EPI_ISL_8248	North America / United States / New York	Human	1999-12-27	329	unassigned	unassigned	1.35742	-3.86914	-2	c2	1999NH	0.207977	NA	NA	NA	NA	NA
A/New York/252/1999	EPI80148	EPI_ISL_8253	North America / United States / New York	Human	1999-01-12	329	unassigned	unassigned	0.858887	-4.125	-2.125	c2	1998NH	0.744101	NA	NA	NA	NA	NA
A/New York/261/1999	EPI80167	EPI_ISL_8254	North America / United States / New York	Human	1999-04-09	329	unassigned	unassigned	0.930664	-4.11719	-2.20898	c2	1999SH	0.527829	NA	NA	NA	NA	NA
A/New York/339/1999	EPI80205	EPI_ISL_8256	North America / United States / New York	Human	1999-02-09	329	unassigned	unassigned	1.87598	-4.35938	-0.755859	c2	1999SH	1.28437	NA	NA	NA	NA	NA
A/New York/424/1999	EPI83666	EPI_ISL_8635	North America / United States / New York	Human	1999-12-16	329	unassigned	unassigned	1.37891	-3.87695	-1.9873	c2	1999NH	0.228181	NA	NA	NA	NA	NA
A/New York/426/1999	EPI83685	EPI_ISL_8636	North America / United States / New York	Human	1999-12-20	329	unassigned	unassigned	1.35742	-3.86914	-2	c2	1999NH	0.207977	NA	NA	NA	NA	NA
A/New York/427/1999	EPI83704	EPI_ISL_8637	North America / United States / New York	Human	1999-12-27	329	unassigned	unassigned	1.34473	-3.87305	-2	c2	1999NH	0.19505	NA	NA	NA	NA	NA
A/New York/421/1999	EPI84160	EPI_ISL_8661	North America / United States / New York	Human	1999-12-31	329	unassigned	unassigned	1.35742	-3.86914	-2	c2	1999NH	0.207977	NA	NA	NA	NA	NA
A/New York/425/1999	EPI84179	EPI_ISL_8662	North America / United States / New York	Human	1999-12-17	329	unassigned	unassigned	1.35742	-3.86914	-2	c2	1999NH	0.207977	NA	NA	NA	NA	NA
A/New York/450/1999	EPI84502	EPI_ISL_8679	North America / United States / New York	Human	1999-01-08	329	unassigned	unassigned	0.930664	-4.11719	-2.20898	c2	1998NH	0.757385	NA	NA	NA	NA	NA
A/New York/449/1999	EPI84483	EPI_ISL_8678	North America / United States / New York	Human	1999-01-04	329	unassigned	unassigned	0.930664	-4.11719	-2.20898	c2	1998NH	0.757385	NA	NA	NA	NA	NA
A/New York/453/1999	EPI84540	EPI_ISL_8681	North America / United States / New York	Human	1999-01-12	329	unassigned	unassigned	0.887695	-4.01172	-2.03711	c2	1998NH	0.675412	NA	NA	NA	NA	NA
A/New York/454/1999	EPI84559	EPI_ISL_8682	North America / United States / New York	Human	1999-01-13	329	unassigned	unassigned	1.12207	-4.00391	-2.05078	c2	1998NH	0.532754	NA	NA	NA	NA	NA
A/New York/451/1999	EPI84521	EPI_ISL_8680	North America / United States / New York	Human	1999-01-11	329	unassigned	unassigned	0.916992	-4.01562	-2.07812	c2	1998NH	0.679857	NA	NA	NA	NA	NA
A/New York/456/1999	EPI84578	EPI_ISL_8683	North America / United States / New York	Human	1999-01-15	329	unassigned	unassigned	1.82129	-4.14844	-1.34375	c2	1998NH	0.500466	NA	NA	NA	NA	NA
A/New York/459/1999	EPI84635	EPI_ISL_8686	North America / United States / New York	Human	1999-01-25	329	unassigned	unassigned	0.990723	-4.08984	-2.18359	c2	1998NH	0.702008	NA	NA	NA	NA	NA
A/New York/457/1999	EPI84597	EPI_ISL_8684	North America / United States / New York	Human	1999-01-15	329	unassigned	unassigned	0.86084	-4.13672	-2.12109	c2	1998NH	0.73997	NA	NA	NA	NA	NA
A/New York/458/1999	EPI84616	EPI_ISL_8685	North America / United States / New York	Human	1999-01-22	329	unassigned	unassigned	1.48633	-4.25	-1.37695	c2	1998NH	0.279322	NA	NA	NA	NA	NA
A/New York/428/1999	EPI85034	EPI_ISL_8707	North America / United States / New York	Human	1999-09-28	329	unassigned	unassigned	0.665039	-3.99805	-2.86914	c2	1999NH	1.0172	NA	NA	NA	NA	NA
A/New York/422/1999	EPI84996	EPI_ISL_8705	North America / United States / New York	Human	1999-12-15	329	unassigned	unassigned	1.37305	-3.86914	-1.99902	c2	1999NH	0.223416	NA	NA	NA	NA	NA
A/New York/423/1999	EPI85015	EPI_ISL_8706	North America / United States / New York	Human	1999-12-16	329	unassigned	unassigned	0.715332	-4.16797	-2.20312	c2	1999NH	0.563057	NA	NA	NA	NA	NA
A/New York/452/1999	EPI90442	EPI_ISL_8955	North America / United States / New York	Human	1999-01-11	329	unassigned	unassigned	1.91309	-4.19922	-1.28809	c2	1998NH	0.611131	NA	NA	NA	NA	NA
A/New York/455/1999	EPI90461	EPI_ISL_8956	North America / United States / New York	Human	1999-01-14	329	unassigned	unassigned	1.77246	-4.23438	-0.876465	c2	1998NH	0.833541	NA	NA	NA	NA	NA
A/New York/397/1999	EPI90687	EPI_ISL_8967	North America / United States / New York	Human	1999-02-04	329	unassigned	unassigned	0.930664	-4.11719	-2.20898	c2	1999SH	0.527829	NA	NA	NA	NA	NA
A/New York/460/1999	EPI92397	EPI_ISL_9056	North America / United States / New York	Human	1999-01-25	329	unassigned	unassigned	1.90625	-4.18359	-1.28223	c2	1998NH	0.607119	NA	NA	NA	NA	NA
A/New York/326/1999	EPI94145	EPI_ISL_9148	North America / United States / New York	Human	1999-01-21	329	unassigned	unassigned	1.16211	-3.99805	-2.22461	c2	1998NH	0.667771	NA	NA	NA	NA	NA
A/Stockholm/1/99	EPI98243	EPI_ISL_9497	Europe / Sweden	Human	1999	329	unassigned	unassigned	1.91504	-4.18359	-1.52832	c2	1998NH	0.523229	NA	NA	NA	NA	NA
A/Panama/2007/1999	EPI577022	EPI_ISL_174195	North America / Panama	Human	1999-07-12	329	unassigned	unassigned	0.919922	-4.51562	-2.11523	c2	1999SH	0.667786	NA	NA	NA	NA	NA
A/Netherlands/301/1999	EPI1868437	EPI_ISL_2402554	Europe / Netherlands	Human	1999-01-01	329	unassigned	unassigned	0.75	-4.17578	-2.19336	c2	1998NH	0.87164	NA	NA	NA	NA	NA
A/New Caledonia/11/99	EPI116765	EPI_ISL_11927	Oceania / New Caledonia	Human	1999-04-17	329	unassigned	unassigned	1.82812	-4.08203	-1.66309	c2	1999SH	0.536242	NA	NA	NA	NA	NA
A/Townsville/1/99	EPI116885	EPI_ISL_11981	Oceania / Australia / Queensland / Townsville	Human	1999-01-10	329	unassigned	unassigned	1.84277	-4.27734	-0.822754	c2	1998NH	0.919108	NA	NA	NA	NA	NA
A/Tehran/83/99	EPI116887	EPI_ISL_11982	Asia / Iran, Islamic Republic of	Human	1999-01-16	329	unassigned	unassigned	2.43945	-3.75781	-1.23828	c2	1998NH	1.16641	NA	NA	NA	NA	NA
A/New Caledonia/1/99	EPI116901	EPI_ISL_11989	Oceania / New Caledonia	Human	1999-02-19	329	unassigned	unassigned	1.82812	-4.08203	-1.66309	c2	1999SH	0.536242	NA	NA	NA	NA	NA
A/Darwin/2/99	EPI116899	EPI_ISL_11988	Oceania / Australia / Northern Territory / Darwin	Human	1999-02-04	329	unassigned	unassigned	1.89258	-4.08203	-1.68066	c2	1999SH	0.589374	NA	NA	NA	NA	NA
A/Oslo/2137/99	EPI119249	EPI_ISL_12698	Europe / Norway / Oslo Fylke	Human	1999-11-24	329	unassigned	unassigned	1.35742	-3.86914	-2	c2	1999NH	0.207977	NA	NA	NA	NA	NA
A/Oslo/2501/99	EPI119251	EPI_ISL_12699	Europe / Norway / Oslo Fylke	Human	1999-11-20	329	unassigned	unassigned	1.35742	-3.86914	-2	c2	1999NH	0.207977	NA	NA	NA	NA	NA
A/Oslo/2512/99	EPI119253	EPI_ISL_12700	Europe / Norway / Oslo Fylke	Human	1999-12-07	329	unassigned	unassigned	1.36719	-3.84375	-1.95703	c2	1999NH	0.222053	NA	NA	NA	NA	NA
A/Panama/2007/1999	EPI362901	EPI_ISL_111375	North America / Panama	Human	1999	329	unassigned	unassigned	1.83496	-3.43555	-1.87012	c2	1998NH	0.859548	NA	NA	NA	NA	NA
A/Victoria/3/1999	EPI585676	EPI_ISL_177748	Oceania / Australia	Human	1999	329	unassigned	unassigned	1.26758	-3.33594	-0.312744	c13	1998NH	1.5337	NA	NA	NA	NA	NA
A/Victoria/3/1999	EPI585677	EPI_ISL_177749	Oceania / Australia	Human	1999	329	unassigned	unassigned	0.38916	-3.80469	-0.174561	c2	1998NH	1.79197	NA	NA	NA	NA	NA
A/Hong Kong/CUHK10100/1999	EPI160952	EPI_ISL_14197	Asia / China	Human	1999-01-07	329	unassigned	unassigned	1.91895	-4.17969	-1.32129	c2	1998NH	0.597183	NA	NA	NA	NA	NA
A/Hong Kong/CUHK10132/1999	EPI160953	EPI_ISL_14198	Asia / China	Human	1999-01-08	329	unassigned	unassigned	1.89258	-4.08203	-1.68066	c2	1998NH	0.497728	NA	NA	NA	NA	NA
A/Hong Kong/CUHK11255/1999	EPI160973	EPI_ISL_14205	Asia / China	Human	1999-02-11	329	unassigned	unassigned	1.77051	-4	-1.58008	c2	1999SH	0.528579	NA	NA	NA	NA	NA
A/Hong Kong/CUHK10151/1999	EPI160955	EPI_ISL_14200	Asia / China	Human	1999-01-09	329	unassigned	unassigned	1.89258	-4.08203	-1.68066	c2	1998NH	0.497728	NA	NA	NA	NA	NA
A/Hong Kong/CUHK11163/1999	EPI160969	EPI_ISL_14201	Asia / China	Human	1999-02-09	329	unassigned	unassigned	1.89258	-4.08203	-1.68066	c2	1999SH	0.589374	NA	NA	NA	NA	NA
A/Hong Kong/CUHK11230/1999	EPI160970	EPI_ISL_14202	Asia / China	Human	1999-02-10	329	unassigned	unassigned	1.89258	-4.08203	-1.68066	c2	1999SH	0.589374	NA	NA	NA	NA	NA
A/Hong Kong/CUHK11237/1999	EPI160971	EPI_ISL_14203	Asia / China	Human	1999-02-11	329	unassigned	unassigned	1.89258	-4.08203	-1.68066	c2	1999SH	0.589374	NA	NA	NA	NA	NA
A/Hong Kong/CUHK11241/1999	EPI160972	EPI_ISL_14204	Asia / China	Human	1999-02-11	329	unassigned	unassigned	1.89258	-4.08203	-1.68066	c2	1999SH	0.589374	NA	NA	NA	NA	NA
A/Hong Kong/CUHK10133/1999	EPI160954	EPI_ISL_14199	Asia / China	Human	1999-01-08	329	unassigned	unassigned	1.89746	-4.06641	-1.69238	c2	1998NH	0.506005	NA	NA	NA	NA	NA
A/Hong Kong/CUHK12312/1999	EPI160977	EPI_ISL_14206	Asia / China	Human	1999-03-24	329	unassigned	unassigned	1.92676	-4.10547	-1.76562	c2	1999SH	0.601204	NA	NA	NA	NA	NA
A/Hong Kong/CUHK12572/1999	EPI160984	EPI_ISL_14207	Asia / China	Human	1999-04-02	329	unassigned	unassigned	1.89258	-4.08203	-1.68066	c2	1999SH	0.589374	NA	NA	NA	NA	NA
A/Hong Kong/CUHK12580/1999	EPI160985	EPI_ISL_14208	Asia / China	Human	1999-04-04	329	unassigned	unassigned	1.89258	-4.08203	-1.68066	c2	1999SH	0.589374	NA	NA	NA	NA	NA
A/Hong Kong/CUHK12897/1999	EPI160988	EPI_ISL_14209	Asia / China	Human	1999-04-14	329	unassigned	unassigned	1.89258	-4.08203	-1.68066	c2	1999SH	0.589374	NA	NA	NA	NA	NA
A/Hong Kong/CUHK13763/1999	EPI161003	EPI_ISL_14210	Asia / China	Human	1999-05-15	329	unassigned	unassigned	1.89258	-4.08203	-1.68066	c2	1999SH	0.589374	NA	NA	NA	NA	NA
A/Hong Kong/CUHK14627/1999	EPI161004	EPI_ISL_14211	Asia / China	Human	1999-06-11	329	unassigned	unassigned	1.91406	-4.08984	-1.68262	c2	1999SH	0.609389	NA	NA	NA	NA	NA
A/Hong Kong/CUHK30314/1999	EPI161102	EPI_ISL_14214	Asia / China	Human	1999-07-03	329	unassigned	unassigned	1.89258	-4.08203	-1.68066	c2	1999SH	0.589374	NA	NA	NA	NA	NA
A/Hong Kong/CUHK14672/1999	EPI161005	EPI_ISL_14212	Asia / China	Human	1999-06-13	329	unassigned	unassigned	1.91602	-4.0625	-1.70215	c2	1999SH	0.604048	NA	NA	NA	NA	NA
A/Hong Kong/CUHK14875/1999	EPI161006	EPI_ISL_14213	Asia / China	Human	1999-06-20	329	unassigned	unassigned	1.89258	-4.08203	-1.68066	c2	1999SH	0.589374	NA	NA	NA	NA	NA
A/Hong Kong/CUHK30419/1999	EPI161103	EPI_ISL_14215	Asia / China	Human	1999-07-05	329	unassigned	unassigned	1.89258	-4.08203	-1.68066	c2	1999SH	0.589374	NA	NA	NA	NA	NA
A/Hong Kong/CUHK30423/1999	EPI161104	EPI_ISL_14216	Asia / China	Human	1999-07-06	329	unassigned	unassigned	1.89258	-4.08203	-1.68066	c2	1999SH	0.589374	NA	NA	NA	NA	NA
A/Hong Kong/CUHK30605/1999	EPI161105	EPI_ISL_14217	Asia / China	Human	1999-07-12	329	unassigned	unassigned	0.350098	-3.80273	-0.222534	c2	1999SH	1.94733	NA	NA	NA	NA	NA
A/Hong Kong/CUHK31490/1999	EPI161108	EPI_ISL_14220	Asia / China	Human	1999-08-06	329	unassigned	unassigned	0.860352	-4.16406	-2.19727	c2	1999SH	0.584654	NA	NA	NA	NA	NA
A/Hong Kong/CUHK31421/1999	EPI161106	EPI_ISL_14218	Asia / China	Human	1999-08-04	329	unassigned	unassigned	1.89258	-4.08203	-1.68066	c2	1999SH	0.589374	NA	NA	NA	NA	NA
A/Hong Kong/CUHK31448/1999	EPI161107	EPI_ISL_14219	Asia / China	Human	1999-08-04	329	unassigned	unassigned	1.89258	-4.08203	-1.68066	c2	1999SH	0.589374	NA	NA	NA	NA	NA
A/Hong Kong/CUHK31510/1999	EPI161109	EPI_ISL_14221	Asia / China	Human	1999-08-07	329	unassigned	unassigned	1.91309	-4.09375	-1.62402	c2	1999SH	0.630296	NA	NA	NA	NA	NA
A/Hong Kong/CUHK32796/1999	EPI161110	EPI_ISL_14222	Asia / China	Human	1999-09-20	329	unassigned	unassigned	0.643555	-4.20703	-2.24414	c2	1999NH	0.654166	NA	NA	NA	NA	NA
A/Hong Kong/CUHK33915/1999	EPI161124	EPI_ISL_14225	Asia / China	Human	1999-10-30	329	unassigned	unassigned	0.665039	-3.99805	-2.86914	c2	1999NH	1.0172	NA	NA	NA	NA	NA
A/Hong Kong/CUHK33829/1999	EPI161120	EPI_ISL_14223	Asia / China	Human	1999-10-27	329	unassigned	unassigned	1.35742	-3.86914	-2	c2	1999NH	0.207977	NA	NA	NA	NA	NA
A/Hong Kong/CUHK33885/1999	EPI161122	EPI_ISL_14224	Asia / China	Human	1999-10-30	329	unassigned	unassigned	1.35742	-3.86914	-2	c2	1999NH	0.207977	NA	NA	NA	NA	NA
A/Hong Kong/CUHK34193/1999	EPI161128	EPI_ISL_14226	Asia / China	Human	1999-11-09	329	unassigned	unassigned	1.35742	-3.86914	-2	c2	1999NH	0.207977	NA	NA	NA	NA	NA
A/Indonesia/240/1999	EPI1923047	EPI_ISL_5522537	Asia / Indonesia / West Java / Bandung	Human	1999-11-04	329	unassigned	unassigned	1.03418	-4.24219	-1.96582	c2	1999NH	0.373472	NA	NA	NA	NA	NA
A/Netherlands/301/1999	EPI367222	EPI_ISL_115773	Europe / Netherlands	Human	1999-10-01	329	unassigned	unassigned	0.75	-4.17578	-2.19336	c2	1999NH	0.536886	NA	NA	NA	NA	NA
A/Indonesia/252/1999	EPI1923048	EPI_ISL_5522538	Asia / Indonesia / West Java / Bandung	Human	1999-11-18	329	unassigned	unassigned	0.89209	-4.05859	-2.25391	c2	1999NH	0.412231	NA	NA	NA	NA	NA
A/Indonesia/274/1999	EPI1923049	EPI_ISL_5522539	Asia / Indonesia / West Java / Bandung	Human	1999	329	unassigned	unassigned	0.881836	-4.06641	-2.24219	c2	1998NH	0.816508	NA	NA	NA	NA	NA
A/Philippines/26/1999	EPI1923154	EPI_ISL_5522615	Asia / Philippines	Human	1999	329	unassigned	unassigned	-0.0895996	-4.70703	-2.27344	c2	1998NH	1.72785	NA	NA	NA	NA	NA
A/Perth/252/1999	EPI1923157	EPI_ISL_5522617	Oceania / Australia / Western Australia / Perth	Human	1999-08-09	329	unassigned	unassigned	1.33789	-3.97656	-1.89648	c2	1999SH	0.0764816	NA	NA	NA	NA	NA
A/Perth/246/1999	EPI1923158	EPI_ISL_5522618	Oceania / Australia / Western Australia / Perth	Human	1999-08-02	329	unassigned	unassigned	0.21167	-4.51953	-2.33984	c2	1999SH	1.30412	NA	NA	NA	NA	NA
A/Netherlands/301/1999	EPI297826	EPI_ISL_84904	Europe / Netherlands	Human	1999	329	unassigned	unassigned	0.75	-4.17578	-2.19336	c2	1998NH	0.87164	NA	NA	NA	NA	NA
A/Malaysia/10759/1999	EPI373295	EPI_ISL_120361	Asia / Malaysia	Human	1999-01-22	329	unassigned	unassigned	1.91309	-4.19922	-1.28809	c2	1998NH	0.611131	NA	NA	NA	NA	NA
A/Townsville/9/1999	EPI1886400	EPI_ISL_3692579	Oceania / Australia / Queensland / Mt Isa	Human	1999-07-14	329	unassigned	unassigned	0.930664	-4.11719	-2.20898	c2	1999SH	0.527829	NA	NA	NA	NA	NA
A/Victoria/1/1999	EPI1886387	EPI_ISL_3692569	Oceania / Australia / Victoria / Box Hill	Human	1999-02-25	329	unassigned	unassigned	1.89258	-4.08203	-1.68066	c2	1999SH	0.589374	NA	NA	NA	NA	NA
A/Victoria/2/1999	EPI1886388	EPI_ISL_3692570	Oceania / Australia / Victoria / Box Hill	Human	1999-02-25	329	unassigned	unassigned	1.89258	-4.08203	-1.68066	c2	1999SH	0.589374	NA	NA	NA	NA	NA
A/Victoria/343/1999	EPI1886389	EPI_ISL_3692571	Oceania / Australia / Victoria / Geelong	Human	1999-07-05	329	unassigned	unassigned	1.44141	-3.93359	-2.14453	c2	1999SH	0.305929	NA	NA	NA	NA	NA
A/Victoria/358/1999	EPI1886391	EPI_ISL_3692573	Oceania / Australia / Victoria / Whittlesea	Human	1999-07-17	329	unassigned	unassigned	0.911621	-4.29688	-2.06641	c2	1999SH	0.526613	NA	NA	NA	NA	NA
A/Victoria/502/1999	EPI1886392	EPI_ISL_3692574	Oceania / Australia / Victoria / Clayton	Human	1999-03-07	329	unassigned	unassigned	2.33203	-3.08984	-1.19531	c2	1999SH	1.54307	NA	NA	NA	NA	NA
A/Johannesburg/57/99	EPI1886402	EPI_ISL_3693290	Africa / South Africa / Guateng	Human	1999-06-08	329	unassigned	unassigned	2.13086	-3.29102	-1.08301	c2	1999SH	1.35734	NA	NA	NA	NA	NA
A/Scotland/211/1999	EPI314885	EPI_ISL_89422	Europe / United Kingdom	Human	1999-12-23	329	unassigned	unassigned	1.35742	-3.86914	-2	c2	1999NH	0.207977	NA	NA	NA	NA	NA
A/Scotland/230/1999	EPI314886	EPI_ISL_89423	Europe / United Kingdom	Human	1999-12-23	329	unassigned	unassigned	1.37891	-3.93555	-1.99023	c2	1999NH	0.232937	NA	NA	NA	NA	NA
A/Scotland/262/1999	EPI314887	EPI_ISL_89424	Europe / United Kingdom	Human	1999-12-31	329	unassigned	unassigned	1.38867	-3.83789	-1.94238	c2	1999NH	0.2461	NA	NA	NA	NA	NA
A/Georgia/NHRC0001/1999	EPI318448	EPI_ISL_90467	North America / United States	Human	1999-10-12	329	unassigned	unassigned	0.78418	-4.16797	-2.19727	c2	1999NH	0.509143	NA	NA	NA	NA	NA
A/Illinois/NHRC0001/1999	EPI318456	EPI_ISL_90468	North America / United States	Human	1999-11-01	329	unassigned	unassigned	1.35742	-3.86914	-2	c2	1999NH	0.207977	NA	NA	NA	NA	NA
A/South Carolina/NHRC0001/1999	EPI318464	EPI_ISL_90469	North America / United States	Human	1999-11-29	329	unassigned	unassigned	1.35742	-3.86914	-2	c2	1999NH	0.207977	NA	NA	NA	NA	NA
A/Bangkok/35/1999	EPI1886211	EPI_ISL_3663345	Asia / Thailand / Bangkok	Human	1999-01-21	329	unassigned	unassigned	1.89258	-4.08203	-1.68066	c2	1998NH	0.497728	NA	NA	NA	NA	NA
A/Brisbane/156/1999	EPI1886216	EPI_ISL_3663350	Oceania / Australia / Queensland / Ipswich	Human	1999-08-04	329	unassigned	unassigned	1.26465	-4.04297	-1.84473	c2	1999SH	0.083574	NA	NA	NA	NA	NA
A/Brisbane/110/1999	EPI1886215	EPI_ISL_3663349	Oceania / Australia / Queensland / Brisbane	Human	1999-07-31	329	unassigned	unassigned	1.37305	-3.97266	-2.05859	c2	1999SH	0.196898	NA	NA	NA	NA	NA
A/Brisbane/39/1999	EPI1886221	EPI_ISL_3663355	Oceania / Australia / Queensland / Brisbane	Human	1999-06-18	329	unassigned	unassigned	1.37305	-3.97266	-2.05859	c2	1999SH	0.196898	NA	NA	NA	NA	NA
A/Brisbane/32/1999	EPI1886219	EPI_ISL_3663353	Oceania / Australia / Queensland / Brisbane	Human	1999-06-15	329	unassigned	unassigned	0.929688	-4.15625	-2.20508	c2	1999SH	0.53246	NA	NA	NA	NA	NA
A/Brisbane/65/1999	EPI1886225	EPI_ISL_3663358	Oceania / Australia / Queensland / Brisbane	Human	1999-07-08	329	unassigned	unassigned	1.41211	-4.22656	-1.88086	c2	1999SH	0.18959	NA	NA	NA	NA	NA
A/Bangkok/72/1999	EPI1886213	EPI_ISL_3663347	Asia / Thailand / Bangkok	Human	1999-02-24	329	unassigned	unassigned	1.89258	-4.08203	-1.68066	c2	1999SH	0.589374	NA	NA	NA	NA	NA
A/Brisbane/71/1999	EPI1886226	EPI_ISL_3663359	Oceania / Australia / Queensland / Brisbane	Human	1999-07-07	329	unassigned	unassigned	1.87207	-4.28125	-1.03027	c2	1999SH	1.03006	NA	NA	NA	NA	NA
A/Brisbane/64/1999	EPI1886223	EPI_ISL_3663357	Oceania / Australia / Queensland / Brisbane	Human	1999-07-07	329	unassigned	unassigned	1.39062	-4.29297	-1.80371	c2	1999SH	0.258774	NA	NA	NA	NA	NA
A/Brisbane/60/1999	EPI1886222	EPI_ISL_3663356	Oceania / Australia / Queensland / Brisbane	Human	1999-07-11	329	unassigned	unassigned	1.33789	-3.97656	-1.89648	c2	1999SH	0.0764816	NA	NA	NA	NA	NA
A/Brisbane/100/1999	EPI1886214	EPI_ISL_3663348	Oceania / Australia / Queensland / Brisbane	Human	1999-07-20	329	unassigned	unassigned	1.3623	-3.91406	-1.97559	c2	1999SH	0.168234	NA	NA	NA	NA	NA
A/Brisbane/28/1999	EPI1886218	EPI_ISL_3663352	Oceania / Australia / Queensland / Brisbane	Human	1999-05-31	329	unassigned	unassigned	1.3125	-3.99023	-1.87305	c2	1999SH	0.0673966	NA	NA	NA	NA	NA
A/Brisbane/33/1999	EPI1886220	EPI_ISL_3663354	Oceania / Australia / Queensland / Brisbane	Human	1999-06-16	329	unassigned	unassigned	1.33789	-3.97656	-1.89648	c2	1999SH	0.0764816	NA	NA	NA	NA	NA
A/Auckland/218/1999	EPI1886199	EPI_ISL_3663335	Oceania / New Zealand / Auckland	Human	1999-05-03	329	unassigned	unassigned	1.37988	-3.86523	-1.96777	c2	1999SH	0.209328	NA	NA	NA	NA	NA
A/Auckland/167/1999	EPI1886196	EPI_ISL_3663332	Oceania / New Zealand / Auckland	Human	1999-06-30	329	unassigned	unassigned	0.477783	-4.24609	-2.21094	c2	1999SH	0.942675	NA	NA	NA	NA	NA
A/Auckland/139/1999	EPI1886194	EPI_ISL_3663330	Oceania / New Zealand / Auckland	Human	1999-06-18	329	unassigned	unassigned	0.75	-4.17578	-2.19336	c2	1999SH	0.678247	NA	NA	NA	NA	NA
A/Auckland/16/1999	EPI1886195	EPI_ISL_3663331	Oceania / New Zealand / Auckland	Human	1999-05-14	329	unassigned	unassigned	1.74414	-2.71484	-1.69629	c2	1999SH	1.40886	NA	NA	NA	NA	NA
A/Auckland/169/1999	EPI1886197	EPI_ISL_3663333	Oceania / New Zealand / Auckland	Human	1999-06-29	329	unassigned	unassigned	0.75	-4.17578	-2.19336	c2	1999SH	0.678247	NA	NA	NA	NA	NA
A/Bangkok/135/1999	EPI1886207	EPI_ISL_3663341	Asia / Thailand / Bangkok	Human	1999-05-24	329	unassigned	unassigned	0.907715	-4.14062	-2.25977	c2	1999SH	0.58083	NA	NA	NA	NA	NA
A/Bangkok/146/1999	EPI1886209	EPI_ISL_3663343	Asia / Thailand / Bangkok	Human	1999-06-01	329	unassigned	unassigned	0.930664	-4.11719	-2.20898	c2	1999SH	0.527829	NA	NA	NA	NA	NA
A/Auckland/121/1999	EPI1886193	EPI_ISL_3663329	Oceania / New Zealand / Auckland	Human	1999-07-09	329	unassigned	unassigned	1.92383	-4.0625	-1.66602	c2	1999SH	0.62306	NA	NA	NA	NA	NA
A/Bangkok/137/1999	EPI1886208	EPI_ISL_3663342	Asia / Thailand / Bangkok	Human	1999-05-24	329	unassigned	unassigned	0.930664	-4.11719	-2.20898	c2	1999SH	0.527829	NA	NA	NA	NA	NA
A/Bangkok/109/1999	EPI1886206	EPI_ISL_3663340	Asia / Thailand / Bangkok	Human	1999-04-01	329	unassigned	unassigned	1.89258	-4.08203	-1.68066	c2	1999SH	0.589374	NA	NA	NA	NA	NA
A/Auckland/28/1999	EPI1886200	EPI_ISL_3663336	Oceania / New Zealand / Auckland	Human	1999-05-06	329	unassigned	unassigned	1.95801	-3.49023	-0.981445	c2	1999SH	1.2279	NA	NA	NA	NA	NA
A/Auckland/1980/1999	EPI1886201	EPI_ISL_3663337	Oceania / New Zealand / Auckland	Human	1999-06-09	329	unassigned	unassigned	0.933594	-4.16406	-2.19727	c2	1999SH	0.526336	NA	NA	NA	NA	NA
A/Townsville/4/1999	EPI1886296	EPI_ISL_3663415	Oceania / Australia / Queensland / Townsville	Human	1999-05-14	329	unassigned	unassigned	1.37305	-3.97266	-2.05859	c2	1999SH	0.196898	NA	NA	NA	NA	NA
A/Sydney/3/1999	EPI1886292	EPI_ISL_3663413	Oceania / Australia / New South Wales / Sydney	Human	1999-02-24	329	unassigned	unassigned	1.85938	-4.08984	-1.69727	c2	1999SH	0.553055	NA	NA	NA	NA	NA
A/Townsville/2/1999	EPI1886295	EPI_ISL_3663414	Oceania / Australia / Queensland / Townsville	Human	1999-05-06	329	unassigned	unassigned	1.37305	-3.97266	-2.05859	c2	1999SH	0.196898	NA	NA	NA	NA	NA
A/Sydney/230/1999	EPI1886290	EPI_ISL_3663411	Oceania / Australia / New South Wales / Sydney	Human	1999-07-06	329	unassigned	unassigned	1.33789	-3.97656	-1.89648	c2	1999SH	0.0764816	NA	NA	NA	NA	NA
A/Sydney/220/1999	EPI1886288	EPI_ISL_3663409	Oceania / Australia / New South Wales / Sydney	Human	1999-07-06	329	unassigned	unassigned	1.49414	-3.99023	-1.92676	c2	1999SH	0.172629	NA	NA	NA	NA	NA
A/Victoria/346/1999	EPI1886304	EPI_ISL_3663421	Oceania / Australia / Victoria / Melton	Human	1999-07-09	329	unassigned	unassigned	1.36621	-4.02344	-1.79297	c2	1999SH	0.0965882	NA	NA	NA	NA	NA
A/Victoria/338/1999	EPI1886302	EPI_ISL_3663419	Oceania / Australia / Victoria / Moonee Ponds	Human	1999-07-02	329	unassigned	unassigned	1.33789	-3.97656	-1.89648	c2	1999SH	0.0764816	NA	NA	NA	NA	NA
A/Victoria/332/1999	EPI1886299	EPI_ISL_3663418	Oceania / Australia / Victoria / Westmeadows	Human	1999-06-28	329	unassigned	unassigned	1.33789	-3.97656	-1.89648	c2	1999SH	0.0764816	NA	NA	NA	NA	NA
A/Victoria/509/1999	EPI1886308	EPI_ISL_3663423	Oceania / Australia / Victoria / Clayton	Human	1999-04-08	329	unassigned	unassigned	0.930664	-4.11719	-2.20898	c2	1999SH	0.527829	NA	NA	NA	NA	NA
A/Victoria/3/1999	EPI1886297	EPI_ISL_3663416	Oceania / Australia / Victoria / St Albans	Human	1999-04-21	329	unassigned	unassigned	0.38916	-3.80469	-0.174561	c2	1999SH	1.96897	NA	NA	NA	NA	NA
A/Singapore/2/1999	EPI1886277	EPI_ISL_3663398	Asia / Singapore	Human	1999-01-12	329	unassigned	unassigned	1.89258	-4.08203	-1.68066	c2	1998NH	0.497728	NA	NA	NA	NA	NA
A/Singapore/45/1999	EPI1886278	EPI_ISL_3663399	Asia / Singapore	Human	1999-02-03	329	unassigned	unassigned	1.87305	-4	-1.58398	c2	1999SH	0.613195	NA	NA	NA	NA	NA
A/Victoria/329/1999	EPI1886298	EPI_ISL_3663417	Oceania / Australia / Victoria / Glen Waverly	Human	1999-06-25	329	unassigned	unassigned	1.33789	-3.97656	-1.89648	c2	1999SH	0.0764816	NA	NA	NA	NA	NA
A/Philippines/101/1999	EPI1886269	EPI_ISL_3663394	Asia / Philippines	Human	1999	329	unassigned	unassigned	1.89258	-4.08203	-1.68066	c2	1998NH	0.497728	NA	NA	NA	NA	NA
A/Singapore/14/1999	EPI1886274	EPI_ISL_3663397	Asia / Singapore	Human	1999-01-21	329	unassigned	unassigned	1.84961	-4.18359	-0.957031	c2	1998NH	0.798469	NA	NA	NA	NA	NA
A/Perth/48/1999	EPI1886265	EPI_ISL_3663392	Oceania / Australia / Western Australia / Medina	Human	1999-08-03	329	unassigned	unassigned	0.358398	-4.41797	-2.33398	c2	1999SH	1.14073	NA	NA	NA	NA	NA
A/Perth/9/1999	EPI1886266	EPI_ISL_3663393	Oceania / Australia / Western Australia / Albany	Human	1999-06-20	329	unassigned	unassigned	0.686035	-4.23047	-2.13867	c2	1999SH	0.72453	NA	NA	NA	NA	NA
A/Victoria/507/1999	EPI1886307	EPI_ISL_3663422	Oceania / Australia / Victoria / Clayton	Human	1999-03-30	329	unassigned	unassigned	1.89258	-4.08203	-1.68066	c2	1999SH	0.589374	NA	NA	NA	NA	NA
A/Sydney/208/1999	EPI1886286	EPI_ISL_3663407	Oceania / Australia / New South Wales / Sydney	Human	1999-04-27	329	unassigned	unassigned	1.89355	-4.0625	-1.77539	c2	1999SH	0.56443	NA	NA	NA	NA	NA
A/South Australia/46/1999	EPI1886283	EPI_ISL_3663404	Oceania / Australia / South Australia	Human	1999-06-15	329	unassigned	unassigned	1.33789	-3.97656	-1.89648	c2	1999SH	0.0764816	NA	NA	NA	NA	NA
A/South Australia/5/1999	EPI1886284	EPI_ISL_3663405	Oceania / Australia / South Australia / Adelaide	Human	1999-05-01	329	unassigned	unassigned	1.44141	-3.93359	-2.14453	c2	1999SH	0.305929	NA	NA	NA	NA	NA
A/South Australia/50/1999	EPI1886285	EPI_ISL_3663406	Oceania / Australia / South Australia	Human	1999-06-16	329	unassigned	unassigned	0.75293	-4.17188	-2.18555	c2	1999SH	0.671421	NA	NA	NA	NA	NA
A/South Australia/30/1999	EPI1886282	EPI_ISL_3663403	Oceania / Australia / South Australia / Adelaide	Human	1999-06-07	329	unassigned	unassigned	1.33789	-3.97656	-1.89648	c2	1999SH	0.0764816	NA	NA	NA	NA	NA
A/South Australia/21/1999	EPI1886281	EPI_ISL_3663402	Oceania / Australia / South Australia / Adelaide	Human	1999-06-01	329	unassigned	unassigned	1.33789	-3.97656	-1.89648	c2	1999SH	0.0764816	NA	NA	NA	NA	NA
A/Singapore/8/1999	EPI1886279	EPI_ISL_3663400	Asia / Singapore	Human	1999-01-21	329	unassigned	unassigned	1.89258	-4.08203	-1.68066	c2	1998NH	0.497728	NA	NA	NA	NA	NA
A/South Australia/132/1999	EPI1886280	EPI_ISL_3663401	Oceania / Australia / South Australia / Adelaide	Human	1999-08-10	329	unassigned	unassigned	1.37305	-3.97266	-2.05859	c2	1999SH	0.196898	NA	NA	NA	NA	NA
A/Malaysia/5/1999	EPI1886253	EPI_ISL_3663381	Asia / Malaysia	Human	1999	329	unassigned	unassigned	1.30859	-3.61719	-1.46777	c2	1998NH	0.544837	NA	NA	NA	NA	NA
A/Malaysia/41/1999	EPI1886251	EPI_ISL_3663380	Asia / Malaysia	Human	1999	329	unassigned	unassigned	1.89258	-4.08203	-1.68066	c2	1998NH	0.497728	NA	NA	NA	NA	NA
A/Malaysia/7/1999	EPI1886254	EPI_ISL_3663382	Asia / Malaysia	Human	1999	329	unassigned	unassigned	1.70508	-4.19141	-1.70508	c2	1998NH	0.32148	NA	NA	NA	NA	NA
A/Johannesburg/72/1999	EPI1886247	EPI_ISL_3663378	Africa / South Africa / Gauteng / Johannesburg	Human	1999-06-18	329	unassigned	unassigned	2.39258	-3.61328	-1.52148	c2	1999SH	1.19626	NA	NA	NA	NA	NA
A/Perth/46/1999	EPI1886264	EPI_ISL_3663391	Oceania / Australia / Western Australia / Kalgoorlie	Human	1999-07-29	329	unassigned	unassigned	0.358398	-4.41797	-2.33398	c2	1999SH	1.14073	NA	NA	NA	NA	NA
A/Perth/43/1999	EPI1886263	EPI_ISL_3663390	Oceania / Australia / Western Australia / Pippingarra	Human	1999-08-06	329	unassigned	unassigned	0.75	-4.17578	-2.19336	c2	1999SH	0.678247	NA	NA	NA	NA	NA
A/Perth/25/1999	EPI1886262	EPI_ISL_3663389	Oceania / Australia / Northern Territory / Jingili	Human	1999-07-20	329	unassigned	unassigned	0.75	-4.17578	-2.19336	c2	1999SH	0.678247	NA	NA	NA	NA	NA
A/Perth/1/1999	EPI1886261	EPI_ISL_3663388	Oceania / Australia / Western Australia / Cragie	Human	1999-03-30	329	unassigned	unassigned	1.89258	-4.08203	-1.68066	c2	1999SH	0.589374	NA	NA	NA	NA	NA
A/New Caledonia/9/1999	EPI1886260	EPI_ISL_3663387	Oceania / New Caledonia	Human	1999-03-10	329	unassigned	unassigned	2.52734	-3.59766	-1.64453	c2	1999SH	1.29368	NA	NA	NA	NA	NA
A/Christchurch/68/1999	EPI1886234	EPI_ISL_3663367	Oceania / New Zealand / Canterbury / Christchurch	Human	1999-08-01	329	unassigned	unassigned	1.34668	-3.90625	-2.0957	c2	1999SH	0.259032	NA	NA	NA	NA	NA
A/Christchurch/149/1999	EPI1886233	EPI_ISL_3663366	Oceania / New Zealand / Canterbury / Christchurch	Human	1999-06-24	329	unassigned	unassigned	1.36914	-3.91016	-1.95312	c2	1999SH	0.161324	NA	NA	NA	NA	NA
A/Christchurch/11/1999	EPI1886232	EPI_ISL_3663365	Oceania / New Zealand / Canterbury / Christchurch	Human	1999-06-19	329	unassigned	unassigned	1.36426	-3.91992	-1.97461	c2	1999SH	0.163208	NA	NA	NA	NA	NA
A/Christchurch/104/1999	EPI1886231	EPI_ISL_3663364	Oceania / New Zealand / Canterbury / Christchurch	Human	1999-08-25	329	unassigned	unassigned	1.35742	-3.86914	-2	c2	1999SH	0.218325	NA	NA	NA	NA	NA
A/New Caledonia/5/1999	EPI1886259	EPI_ISL_3663386	Oceania / New Caledonia	Human	1999-03-10	329	unassigned	unassigned	1.1875	-4.05469	-1.74219	c2	1999SH	0.205953	NA	NA	NA	NA	NA
A/Brisbane/85/1999	EPI1886230	EPI_ISL_3663363	Oceania / Australia / Queensland / Brisbane	Human	1999-07-18	329	unassigned	unassigned	1.35742	-3.86914	-2	c2	1999SH	0.218325	NA	NA	NA	NA	NA
A/Brisbane/8/1999	EPI1886229	EPI_ISL_3663362	Oceania / Australia / Queensland / Brisbane	Human	1999-03-08	329	unassigned	unassigned	1.89258	-4.08203	-1.68066	c2	1999SH	0.589374	NA	NA	NA	NA	NA
A/Brisbane/76/1999	EPI1886228	EPI_ISL_3663361	Oceania / Australia / Queensland / Brisbane	Human	1999-07-12	329	unassigned	unassigned	1.33789	-3.97656	-1.89648	c2	1999SH	0.0764816	NA	NA	NA	NA	NA
A/Darwin/7/1999	EPI1886241	EPI_ISL_3663373	Oceania / Australia / Northern Territory / Darwin	Human	1999-05-05	329	unassigned	unassigned	1.89258	-4.08203	-1.68066	c2	1999SH	0.589374	NA	NA	NA	NA	NA
A/Darwin/5/1999	EPI1886240	EPI_ISL_3663372	Oceania / Australia / Northern Territory / Darwin	Human	1999-03-20	329	unassigned	unassigned	2.33203	-3.08984	-1.19531	c2	1999SH	1.54307	NA	NA	NA	NA	NA
A/Brisbane/72/1999	EPI1886227	EPI_ISL_3663360	Oceania / Australia / Queensland / Brisbane	Human	1999-07-07	329	unassigned	unassigned	1.33789	-3.97656	-1.89648	c2	1999SH	0.0764816	NA	NA	NA	NA	NA
A/Christchurch/7/1999	EPI1886235	EPI_ISL_3663368	Oceania / New Zealand / Canterbury / Christchurch	Human	1999-06-29	329	unassigned	unassigned	1.38574	-3.93555	-1.93359	c2	1999SH	0.135415	NA	NA	NA	NA	NA
A/Victoria/586/1999	EPI1886335	EPI_ISL_3663441	Oceania / Australia / Victoria / Bangholme	Human	1999-07-31	329	unassigned	unassigned	1.30566	-4.03906	-1.81543	c2	1999SH	0.0750526	NA	NA	NA	NA	NA
A/Wellington/47/1999	EPI1886352	EPI_ISL_3663457	Oceania / New Zealand / Wellington / Wellington	Human	1999	329	unassigned	unassigned	0.930664	-4.11719	-2.20898	c2	1998NH	0.757385	NA	NA	NA	NA	NA
A/Victoria/609/1999	EPI1886342	EPI_ISL_3663447	Oceania / Australia / Victoria / Hampton	Human	1999-09-26	329	unassigned	unassigned	1.33789	-3.97656	-1.89648	c2	1999NH	0.223964	NA	NA	NA	NA	NA
A/Wellington/26/1999	EPI1886350	EPI_ISL_3663455	Oceania / New Zealand / Wellington / Wellington	Human	1999	329	unassigned	unassigned	1.89258	-4.08203	-1.68066	c2	1998NH	0.497728	NA	NA	NA	NA	NA
A/Waikato/28/1999	EPI1886347	EPI_ISL_3663452	Oceania / New Zealand / Waikato / Waikato	Human	1999	329	unassigned	unassigned	0.868164	-4.24219	-2.0918	c2	1998NH	0.723078	NA	NA	NA	NA	NA
A/Victoria/599/1999	EPI1886340	EPI_ISL_3663445	Oceania / Australia / Victoria / Mentone	Human	1999-08-19	329	unassigned	unassigned	1.30371	-3.98438	-1.95801	c2	1999SH	0.10792	NA	NA	NA	NA	NA
A/Victoria/588/1999	EPI1886337	EPI_ISL_3663442	Oceania / Australia / Victoria / Coronet Bay	Human	1999-07-27	329	unassigned	unassigned	1.39062	-4.29297	-1.80371	c2	1999SH	0.258774	NA	NA	NA	NA	NA
A/Wellington/56/1999	EPI1886353	EPI_ISL_3663458	Oceania / New Zealand / Wellington / Wellington	Human	1999	329	unassigned	unassigned	0.755371	-4.33594	-2.13672	c2	1998NH	0.854353	NA	NA	NA	NA	NA
A/Victoria/593/1999	EPI1886339	EPI_ISL_3663444	Oceania / Australia / Victoria / Lysterfield	Human	1999-08-02	329	unassigned	unassigned	0.763672	-4.16406	-2.18555	c2	1999SH	0.660685	NA	NA	NA	NA	NA
A/Victoria/585/1999	EPI1886334	EPI_ISL_3663440	Oceania / Australia / Victoria / Pakenham	Human	1999-07-31	329	unassigned	unassigned	1.43457	-3.98828	-1.58984	c2	1999SH	0.313159	NA	NA	NA	NA	NA
A/Waikato/23/1999	EPI1886346	EPI_ISL_3663451	Oceania / New Zealand / Waikato / Waikato	Human	1999	329	unassigned	unassigned	0.929688	-4.15625	-2.20508	c2	1998NH	0.755128	NA	NA	NA	NA	NA
A/Victoria/591/1999	EPI1886338	EPI_ISL_3663443	Oceania / Australia / Victoria / Carnegie	Human	1999-08-08	329	unassigned	unassigned	1.37305	-3.97266	-2.05859	c2	1999SH	0.196898	NA	NA	NA	NA	NA
A/Wellington/11/1999	EPI1886349	EPI_ISL_3663454	Oceania / New Zealand / Wellington / Porirua	Human	1999	329	unassigned	unassigned	1.46777	-4.28906	-1.34961	c2	1998NH	0.315768	NA	NA	NA	NA	NA
A/Waikato/22/1999	EPI1886345	EPI_ISL_3663450	Oceania / New Zealand / Waikato / Waikato	Human	1999	329	unassigned	unassigned	1.88867	-4.25391	-1.19629	c2	1998NH	0.654201	NA	NA	NA	NA	NA
A/Victoria/601/1999	EPI1886341	EPI_ISL_3663446	Oceania / Australia / Victoria / Rowville	Human	1999-08-19	329	unassigned	unassigned	0.930664	-4.11719	-2.20898	c2	1999SH	0.527829	NA	NA	NA	NA	NA
A/Victoria/614/1999	EPI1886343	EPI_ISL_3663448	Oceania / Australia / Victoria / Clayton	Human	1999-11-20	329	unassigned	unassigned	1.15625	-4.125	-1.76172	c2	1999NH	0.323967	NA	NA	NA	NA	NA
A/Waikato/21/1999	EPI1886344	EPI_ISL_3663449	Oceania / New Zealand / Waikato / Waikato	Human	1999	329	unassigned	unassigned	1.89453	-4.07812	-1.6748	c2	1998NH	0.499346	NA	NA	NA	NA	NA
A/Victoria/552/1999	EPI1886320	EPI_ISL_3663431	Oceania / Australia / Victoria / Clayton	Human	1999-07-12	329	unassigned	unassigned	0.873535	-4.5	-2.16602	c2	1999SH	0.706446	NA	NA	NA	NA	NA
A/Victoria/544/1999	EPI1886318	EPI_ISL_3663429	Oceania / Australia / Victoria / Narre Warren	Human	1999-07-08	329	unassigned	unassigned	1.33789	-3.97656	-1.89648	c2	1999SH	0.0764816	NA	NA	NA	NA	NA
A/Victoria/546/1999	EPI1886319	EPI_ISL_3663430	Oceania / Australia / Victoria / Clayton	Human	1999-07-09	329	unassigned	unassigned	0.928711	-4.24609	-1.99609	c2	1999SH	0.468593	NA	NA	NA	NA	NA
A/Victoria/538/1999	EPI1886317	EPI_ISL_3663428	Oceania / Australia / Victoria / Clayton	Human	1999-07-03	329	unassigned	unassigned	1.33789	-3.97656	-1.89648	c2	1999SH	0.0764816	NA	NA	NA	NA	NA
A/Victoria/522/1999	EPI1886314	EPI_ISL_3663425	Oceania / Australia / Victoria / Clayton	Human	1999-06-08	329	unassigned	unassigned	1.33789	-3.97656	-1.89648	c2	1999SH	0.0764816	NA	NA	NA	NA	NA
A/Victoria/578/1999	EPI1886333	EPI_ISL_3663439	Oceania / Australia / Victoria / Black Rock	Human	1999-07-26	329	unassigned	unassigned	1.48047	-3.77148	-1.99414	c2	1999SH	0.33328	NA	NA	NA	NA	NA
A/Victoria/516/1999	EPI1886311	EPI_ISL_3663424	Oceania / Australia / Victoria / Clayton	Human	1999-05-06	329	unassigned	unassigned	1.8252	-4.17188	-1.37012	c2	1999SH	0.715532	NA	NA	NA	NA	NA
A/Victoria/537/1999	EPI1886316	EPI_ISL_3663427	Oceania / Australia / Victoria / Clayton	Human	1999-07-03	329	unassigned	unassigned	1.33789	-3.97656	-1.89648	c2	1999SH	0.0764816	NA	NA	NA	NA	NA
A/Victoria/536/1999	EPI1886315	EPI_ISL_3663426	Oceania / Australia / Victoria / Clayton	Human	1999-07-02	329	unassigned	unassigned	1.38477	-4.53906	-1.48438	c2	1999SH	0.630372	NA	NA	NA	NA	NA
A/Victoria/569/1999	EPI1886327	EPI_ISL_3663436	Oceania / Australia / Victoria / Springvale	Human	1999-07-22	329	unassigned	unassigned	1.33789	-3.97656	-1.89648	c2	1999SH	0.0764816	NA	NA	NA	NA	NA
A/Victoria/577/1999	EPI1886332	EPI_ISL_3663438	Oceania / Australia / Victoria / Bonbeach	Human	1999-07-26	329	unassigned	unassigned	1.39062	-4.29297	-1.80371	c2	1999SH	0.258774	NA	NA	NA	NA	NA
A/Victoria/559/1999	EPI1886324	EPI_ISL_3663433	Oceania / Australia / Victoria / Bangholme	Human	1999-07-17	329	unassigned	unassigned	1.33789	-3.97656	-1.89648	c2	1999SH	0.0764816	NA	NA	NA	NA	NA
A/Victoria/561/1999	EPI1886325	EPI_ISL_3663434	Oceania / Australia / Victoria / Oakleigh	Human	1999-07-19	329	unassigned	unassigned	1.33789	-3.97656	-1.89648	c2	1999SH	0.0764816	NA	NA	NA	NA	NA
A/Victoria/553/1999	EPI1886321	EPI_ISL_3663432	Oceania / Australia / Victoria / Clayton	Human	1999-07-14	329	unassigned	unassigned	1.05078	-4.20703	-1.99023	c2	1999SH	0.345342	NA	NA	NA	NA	NA
A/Sydney/203/1999	EPI1923312	EPI_ISL_5632582	Oceania / Australia / New South Wales / Randwick	Human	1999-02-15	329	unassigned	unassigned	0.930664	-4.11719	-2.20898	c2	1999SH	0.527829	NA	NA	NA	NA	NA
A/Moscow/10/1999	EPI390066	EPI_ISL_127595	Europe / Russian Federation	Human	1999	329	unassigned	unassigned	1.58008	-4.3125	-1.94824	c2	1998NH	0.417505	NA	NA	NA	NA	NA
A/California/32/1999	EPI390093	EPI_ISL_127601	North America / United States / California	Human	1999	329	unassigned	unassigned	2.28125	-3.4043	-1.84668	c2	1998NH	1.1653	NA	NA	NA	NA	NA
A/Philippines/26A/1999	EPI1923390	EPI_ISL_5632701	Asia / Philippines	Human	1999	329	unassigned	unassigned	-0.0895996	-4.70703	-2.27344	c2	1998NH	1.72785	NA	NA	NA	NA	NA
A/Christchurch/68/1999	EPI2120309	EPI_ISL_14284818	Oceania / New Zealand / Canterbury / Christchurch	Human	1999-08-01	329	unassigned	unassigned	1.35742	-3.86914	-2	c2	1999SH	0.218325	NA	NA	NA	NA	NA
A/Netherlands/197/00	EPI541872	EPI_ISL_166349	Europe / Netherlands / Nijmegen	Human	2000-02-03	329	unassigned	unassigned	1.27344	-3.71484	-1.83887	c2	2000SH	0.32859	NA	NA	NA	NA	NA
A/VICTORIA/544/2002	EPI237912	EPI_ISL_68359	Oceania / Australia / Victoria	Human	2000-08-15	329	unassigned	unassigned	-0.0521545	-4.40234	-3.10547	c2	2000SH	1.64045	NA	NA	NA	NA	NA
A/Sydney/228/2000	EPI545311	EPI_ISL_167273	Oceania / Australia	Human	2000	329	unassigned	unassigned	0.505371	-3.85547	-1.9873	c2	1999NH	0.646499	NA	NA	NA	NA	NA
A/Fujian/140/2000	EPI545316	EPI_ISL_167278	Asia / China	Human	2000	329	unassigned	unassigned	0.935059	-2.94727	-1.4668	c2	1999NH	1.09416	NA	NA	NA	NA	NA
A/France/2/00	EPI22521	EPI_ISL_4080	Europe / France	Human	2000	329	unassigned	unassigned	1.3916	-3.90625	-1.92188	c2	1999NH	0.248735	NA	NA	NA	NA	NA
A/France/3/00	EPI22523	EPI_ISL_4081	Europe / France	Human	2000	329	unassigned	unassigned	0.744141	-4.17578	-2.19336	c2	1999NH	0.541277	NA	NA	NA	NA	NA
A/France/4/00	EPI22525	EPI_ISL_4082	Europe / France	Human	2000	329	unassigned	unassigned	0.851562	-4.09766	-2.27734	c2	1999NH	0.469795	NA	NA	NA	NA	NA
A/France/5/00	EPI22527	EPI_ISL_4083	Europe / France	Human	2000	329	unassigned	unassigned	0.741699	-4.16406	-2.00195	c2	1999NH	0.494199	NA	NA	NA	NA	NA
A/France/6/00	EPI22529	EPI_ISL_4084	Europe / France	Human	2000	329	unassigned	unassigned	0.582031	-4.22656	-1.95703	c2	1999NH	0.662673	NA	NA	NA	NA	NA
A/France/7/00	EPI22531	EPI_ISL_4085	Europe / France	Human	2000	329	unassigned	unassigned	0.78418	-4.16797	-2.19727	c2	1999NH	0.509143	NA	NA	NA	NA	NA
A/France/8/00	EPI22533	EPI_ISL_4086	Europe / France	Human	2000	329	unassigned	unassigned	0.991699	-4.08203	-2.21289	c2	1999NH	0.340925	NA	NA	NA	NA	NA
A/France/9/00	EPI22535	EPI_ISL_4087	Europe / France	Human	2000	329	unassigned	unassigned	0.991699	-4.08203	-2.21289	c2	1999NH	0.340925	NA	NA	NA	NA	NA
A/France/10/00	EPI22537	EPI_ISL_4088	Europe / France	Human	2000	329	unassigned	unassigned	0.78418	-4.16797	-2.19727	c2	1999NH	0.509143	NA	NA	NA	NA	NA
A/France/11/00	EPI22539	EPI_ISL_4089	Europe / France	Human	2000	329	unassigned	unassigned	0.78418	-4.16797	-2.19727	c2	1999NH	0.509143	NA	NA	NA	NA	NA
A/France/12/00	EPI22541	EPI_ISL_4090	Europe / France	Human	2000	329	unassigned	unassigned	0.696289	-4.16797	-2.29102	c2	1999NH	0.616862	NA	NA	NA	NA	NA
A/France/13/00	EPI22543	EPI_ISL_4091	Europe / France	Human	2000	329	unassigned	unassigned	0.775879	-4.1875	-2.18164	c2	1999NH	0.519844	NA	NA	NA	NA	NA
A/France/14/00	EPI22545	EPI_ISL_4092	Europe / France	Human	2000	329	unassigned	unassigned	0.841309	-4.16406	-2.26367	c2	1999NH	0.501348	NA	NA	NA	NA	NA
A/France/15/00	EPI22547	EPI_ISL_4093	Europe / France	Human	2000	329	unassigned	unassigned	0.75	-4.17578	-2.19336	c2	1999NH	0.536886	NA	NA	NA	NA	NA
A/France/16/00	EPI22549	EPI_ISL_4094	Europe / France	Human	2000	329	unassigned	unassigned	0.817383	-4.24609	-2.11719	c2	1999NH	0.507774	NA	NA	NA	NA	NA
A/France/17/00	EPI22551	EPI_ISL_4095	Europe / France	Human	2000	329	unassigned	unassigned	0.58252	-4.20703	-1.95215	c2	1999NH	0.652688	NA	NA	NA	NA	NA
A/France/18/00	EPI22553	EPI_ISL_4096	Europe / France	Human	2000	329	unassigned	unassigned	1.33887	-3.87109	-1.81445	c2	1999NH	0.252505	NA	NA	NA	NA	NA
A/France/19/00	EPI22555	EPI_ISL_4097	Europe / France	Human	2000	329	unassigned	unassigned	1.37305	-3.86914	-1.99902	c2	1999NH	0.223416	NA	NA	NA	NA	NA
A/France/20/00	EPI22557	EPI_ISL_4098	Europe / France	Human	2000	329	unassigned	unassigned	1.35742	-3.86914	-2	c2	1999NH	0.207977	NA	NA	NA	NA	NA
A/France/21/00	EPI22559	EPI_ISL_4099	Europe / France	Human	2000	329	unassigned	unassigned	1.37695	-3.86914	-1.9834	c2	1999NH	0.22669	NA	NA	NA	NA	NA
A/France/22/00	EPI22561	EPI_ISL_4100	Europe / France	Human	2000	329	unassigned	unassigned	1.35742	-3.86914	-2	c2	1999NH	0.207977	NA	NA	NA	NA	NA
A/France/23/00	EPI22563	EPI_ISL_4101	Europe / France	Human	2000	329	unassigned	unassigned	1.91016	-3.78906	-2.24805	c2	1999NH	0.810308	NA	NA	NA	NA	NA
A/France/24/00	EPI22565	EPI_ISL_4102	Europe / France	Human	2000	329	unassigned	unassigned	1.3623	-3.86914	-1.99805	c2	1999NH	0.212671	NA	NA	NA	NA	NA
A/France/26/00	EPI22569	EPI_ISL_4104	Europe / France	Human	2000	329	unassigned	unassigned	1.35742	-3.86914	-2	c2	1999NH	0.207977	NA	NA	NA	NA	NA
A/France/25/00	EPI22567	EPI_ISL_4103	Europe / France	Human	2000	329	unassigned	unassigned	1.34668	-3.9043	-1.86523	c2	1999NH	0.228622	NA	NA	NA	NA	NA
A/France/27/00	EPI22571	EPI_ISL_4105	Europe / France	Human	2000	329	unassigned	unassigned	1.34961	-3.85938	-2.00781	c2	1999NH	0.202208	NA	NA	NA	NA	NA
A/France/28/00	EPI22573	EPI_ISL_4106	Europe / France	Human	2000	329	unassigned	unassigned	1.35742	-3.86914	-2	c2	1999NH	0.207977	NA	NA	NA	NA	NA
A/France/29/00	EPI22575	EPI_ISL_4107	Europe / France	Human	2000	329	unassigned	unassigned	1.35742	-3.86914	-2	c2	1999NH	0.207977	NA	NA	NA	NA	NA
A/France/30/00	EPI22577	EPI_ISL_4108	Europe / France	Human	2000	329	unassigned	unassigned	1.35742	-3.86914	-2	c2	1999NH	0.207977	NA	NA	NA	NA	NA
A/France/33/00	EPI22583	EPI_ISL_4111	Europe / France	Human	2000	329	unassigned	unassigned	1.35742	-3.86914	-2	c2	1999NH	0.207977	NA	NA	NA	NA	NA
A/France/31/00	EPI22579	EPI_ISL_4109	Europe / France	Human	2000	329	unassigned	unassigned	1.35742	-3.85547	-2.08789	c2	1999NH	0.234042	NA	NA	NA	NA	NA
A/France/32/00	EPI22581	EPI_ISL_4110	Europe / France	Human	2000	329	unassigned	unassigned	1.35742	-3.86914	-2	c2	1999NH	0.207977	NA	NA	NA	NA	NA
A/France/36/00	EPI22589	EPI_ISL_4114	Europe / France	Human	2000	329	unassigned	unassigned	1.35742	-3.86914	-2	c2	1999NH	0.207977	NA	NA	NA	NA	NA
A/France/35/00	EPI22587	EPI_ISL_4113	Europe / France	Human	2000	329	unassigned	unassigned	1.35156	-3.87305	-1.99512	c2	1999NH	0.201472	NA	NA	NA	NA	NA
A/France/37/00	EPI22591	EPI_ISL_4115	Europe / France	Human	2000	329	unassigned	unassigned	1.35742	-3.86914	-2	c2	1999NH	0.207977	NA	NA	NA	NA	NA
A/France/34/00	EPI22585	EPI_ISL_4112	Europe / France	Human	2000	329	unassigned	unassigned	1.35742	-3.86914	-2	c2	1999NH	0.207977	NA	NA	NA	NA	NA
A/France/38/00	EPI22593	EPI_ISL_4116	Europe / France	Human	2000	329	unassigned	unassigned	1.35742	-3.86914	-2	c2	1999NH	0.207977	NA	NA	NA	NA	NA
A/France/39/00	EPI22595	EPI_ISL_4117	Europe / France	Human	2000	329	unassigned	unassigned	1.35742	-3.86914	-2	c2	1999NH	0.207977	NA	NA	NA	NA	NA
A/France/40/00	EPI22597	EPI_ISL_4118	Europe / France	Human	2000	329	unassigned	unassigned	1.35742	-3.86914	-2	c2	1999NH	0.207977	NA	NA	NA	NA	NA
A/France/41/00	EPI22599	EPI_ISL_4119	Europe / France	Human	2000	329	unassigned	unassigned	1.35742	-3.86914	-2	c2	1999NH	0.207977	NA	NA	NA	NA	NA
A/France/42/00	EPI22601	EPI_ISL_4120	Europe / France	Human	2000	329	unassigned	unassigned	1.38086	-3.85156	-1.98145	c2	1999NH	0.23267	NA	NA	NA	NA	NA
A/France/43/00	EPI22603	EPI_ISL_4121	Europe / France	Human	2000	329	unassigned	unassigned	1.35742	-3.86914	-2	c2	1999NH	0.207977	NA	NA	NA	NA	NA
A/France/44/00	EPI22605	EPI_ISL_4122	Europe / France	Human	2000	329	unassigned	unassigned	0.903809	-4.15625	-1.97266	c2	1999NH	0.365038	NA	NA	NA	NA	NA
A/France/45/00	EPI22607	EPI_ISL_4123	Europe / France	Human	2000	329	unassigned	unassigned	1.35742	-3.86914	-2	c2	1999NH	0.207977	NA	NA	NA	NA	NA
A/France/46/00	EPI22609	EPI_ISL_4124	Europe / France	Human	2000	329	unassigned	unassigned	1.35742	-3.86914	-2	c2	1999NH	0.207977	NA	NA	NA	NA	NA
A/France/47/00	EPI22611	EPI_ISL_4125	Europe / France	Human	2000	329	unassigned	unassigned	1.35742	-3.86914	-2	c2	1999NH	0.207977	NA	NA	NA	NA	NA
A/France/48/00	EPI22613	EPI_ISL_4126	Europe / France	Human	2000	329	unassigned	unassigned	1.34277	-3.87305	-1.97949	c2	1999NH	0.192327	NA	NA	NA	NA	NA
A/France/49/00	EPI22615	EPI_ISL_4127	Europe / France	Human	2000	329	unassigned	unassigned	1.35742	-3.86914	-2	c2	1999NH	0.207977	NA	NA	NA	NA	NA
A/France/51/00	EPI22619	EPI_ISL_4129	Europe / France	Human	2000	329	unassigned	unassigned	1.35742	-3.86914	-2	c2	1999NH	0.207977	NA	NA	NA	NA	NA
A/France/50/00	EPI22617	EPI_ISL_4128	Europe / France	Human	2000	329	unassigned	unassigned	1.35059	-3.45703	-2.31055	c2	1999NH	0.577169	NA	NA	NA	NA	NA
A/France/52/00	EPI22621	EPI_ISL_4130	Europe / France	Human	2000	329	unassigned	unassigned	1.32227	-3.85938	-1.94824	c2	1999NH	0.176903	NA	NA	NA	NA	NA
A/France/54/00	EPI22625	EPI_ISL_4132	Europe / France	Human	2000	329	unassigned	unassigned	1.34961	-3.92969	-1.97168	c2	1999NH	0.20321	NA	NA	NA	NA	NA
A/France/53/00	EPI22623	EPI_ISL_4131	Europe / France	Human	2000	329	unassigned	unassigned	1.4707	-3.84766	-2.03125	c2	1999NH	0.325867	NA	NA	NA	NA	NA
A/Netherlands/3/00	EPI23820	EPI_ISL_4236	Europe / Netherlands	Human	2000	329	unassigned	unassigned	1.2666	-3.73633	-1.83203	c2	1999NH	0.242733	NA	NA	NA	NA	NA
A/RiodeJaneiro/28/00	EPI26590	EPI_ISL_4901	South America / Brazil / Estado do Rio de Janeiro	Human	2000	329	unassigned	unassigned	1.49414	-3.91602	-1.61133	c2	1999NH	0.506151	NA	NA	NA	NA	NA
A/EspiritoSanto/128/00	EPI26592	EPI_ISL_4902	South America / Brazil / Estado do Rio Grande do Norte / Espirito Santo	Human	2000	329	unassigned	unassigned	1.35742	-3.86914	-2	c2	1999NH	0.207977	NA	NA	NA	NA	NA
A/New York/150/2000	EPI27985	EPI_ISL_5050	North America / United States / New York	Human	2000-01-28	329	unassigned	unassigned	1.35742	-3.86914	-2	c2	1999NH	0.207977	NA	NA	NA	NA	NA
A/New York/154/2000	EPI28327	EPI_ISL_5068	North America / United States / New York	Human	2000-01-24	329	unassigned	unassigned	1.35742	-3.86914	-2	c2	1999NH	0.207977	NA	NA	NA	NA	NA
A/New York/169/2000	EPI28441	EPI_ISL_5074	North America / United States / New York	Human	2000-01-03	329	unassigned	unassigned	1.35742	-3.86914	-2	c2	1999NH	0.207977	NA	NA	NA	NA	NA
A/New York/170/2000	EPI28460	EPI_ISL_5075	North America / United States / New York	Human	2000-01-05	329	unassigned	unassigned	1.35742	-3.86914	-2	c2	1999NH	0.207977	NA	NA	NA	NA	NA
A/New York/173/2000	EPI28517	EPI_ISL_5078	North America / United States / New York	Human	2000-02-02	329	unassigned	unassigned	1.35742	-3.86914	-2	c2	2000SH	0.3064	NA	NA	NA	NA	NA
A/New York/174/2000	EPI28536	EPI_ISL_5079	North America / United States / New York	Human	2000-01-04	329	unassigned	unassigned	1.35742	-3.86914	-2	c2	1999NH	0.207977	NA	NA	NA	NA	NA
A/New York/176/2000	EPI28574	EPI_ISL_5081	North America / United States / New York	Human	2000-03-01	329	unassigned	unassigned	1.3623	-3.88477	-1.96973	c2	2000SH	0.312439	NA	NA	NA	NA	NA
A/New York/175/2000	EPI28555	EPI_ISL_5080	North America / United States / New York	Human	2000-01-06	329	unassigned	unassigned	1.35742	-3.86914	-2	c2	1999NH	0.207977	NA	NA	NA	NA	NA
A/Canterbury/90/2000	EPI97036	EPI_ISL_5082	Oceania / New Zealand / Canterbury	Human	2000-10-07	329	unassigned	unassigned	0.505371	-3.85547	-1.9873	c2	2000NH	0.2345	NA	NA	NA	NA	NA
A/Canterbury/96/2000	EPI29101	EPI_ISL_5109	Oceania / New Zealand / Canterbury	Human	2000-10-25	329	unassigned	unassigned	0.505371	-3.85547	-1.9873	c2	2000NH	0.2345	NA	NA	NA	NA	NA
A/Canterbury/92/2000	EPI29120	EPI_ISL_5110	Oceania / New Zealand / Canterbury	Human	2000-10-12	329	unassigned	unassigned	0.505371	-3.85547	-1.9873	c2	2000NH	0.2345	NA	NA	NA	NA	NA
A/Canterbury/3/2000	EPI29139	EPI_ISL_5111	Oceania / New Zealand / Canterbury	Human	2000-05-05	329	unassigned	unassigned	1.4375	-3.85156	-2.06641	c2	2000SH	0.392584	NA	NA	NA	NA	NA
A/Canterbury/2/2000	EPI29177	EPI_ISL_5113	Oceania / New Zealand / Canterbury	Human	2000-01-20	329	unassigned	unassigned	1.3623	-3.84375	-2.03711	c2	1999NH	0.222652	NA	NA	NA	NA	NA
A/Nelson Marlborough/1/2000	EPI29196	EPI_ISL_5114	Oceania / New Zealand	Human	2000-02-04	329	unassigned	unassigned	1.35742	-3.86914	-2	c2	2000SH	0.3064	NA	NA	NA	NA	NA
A/Canterbury/64/2000	EPI29234	EPI_ISL_5116	Oceania / New Zealand / Canterbury	Human	2000-09-06	329	unassigned	unassigned	0.505371	-3.85547	-1.9873	c2	2000NH	0.2345	NA	NA	NA	NA	NA
A/Canterbury/67/2000	EPI29272	EPI_ISL_5118	Oceania / New Zealand / Canterbury	Human	2000-09-08	329	unassigned	unassigned	0.0550232	-4.17578	-1.90137	c2	2000NH	0.737466	NA	NA	NA	NA	NA
A/Canterbury/61/2000	EPI29291	EPI_ISL_5119	Oceania / New Zealand / Canterbury	Human	2000-09-06	329	unassigned	unassigned	0.527344	-4.18359	-1.80566	c2	2000NH	0.446755	NA	NA	NA	NA	NA
A/Canterbury/94/2000	EPI29804	EPI_ISL_5143	Oceania / New Zealand / Canterbury	Human	2000-10-20	329	unassigned	unassigned	1.37695	-3.86914	-1.9834	c2	2000NH	0.677509	NA	NA	NA	NA	NA
A/Wellington/9/2000	EPI33660	EPI_ISL_5341	Oceania / New Zealand / Wellington	Human	2000-08-22	329	unassigned	unassigned	0.49707	-3.82812	-2.02539	c2	2000SH	0.558897	NA	NA	NA	NA	NA
A/Canterbury/62/2000	EPI33762	EPI_ISL_5347	Oceania / New Zealand / Canterbury	Human	2000-09-04	329	unassigned	unassigned	0.527344	-4.18359	-1.80566	c2	2000NH	0.446755	NA	NA	NA	NA	NA
A/Waikato/1/2000	EPI34959	EPI_ISL_5409	Oceania / New Zealand / Waikato	Human	2000-08-09	329	unassigned	unassigned	0.736816	-3.84766	-2.3457	c2	2000SH	0.466413	NA	NA	NA	NA	NA
A/Waikato/5/2000	EPI35833	EPI_ISL_5454	Oceania / New Zealand / Waikato	Human	2000-08-30	329	unassigned	unassigned	0.505371	-3.85547	-1.9873	c2	2000SH	0.548042	NA	NA	NA	NA	NA
A/Canterbury/97/2000	EPI36935	EPI_ISL_5512	Oceania / New Zealand / Canterbury	Human	2000-10-25	329	unassigned	unassigned	0.505371	-3.85547	-1.9873	c2	2000NH	0.2345	NA	NA	NA	NA	NA
A/Dunedin/1/2000	EPI37372	EPI_ISL_5535	Oceania / New Zealand / Dunedin	Human	2000-01-21	329	unassigned	unassigned	1.29492	-3.76758	-1.82617	c2	1999NH	0.244068	NA	NA	NA	NA	NA
A/Waikato/4/2000	EPI37391	EPI_ISL_5536	Oceania / New Zealand / Waikato	Human	2000-08-28	329	unassigned	unassigned	0.368164	-3.8457	-1.97852	c2	2000SH	0.685819	NA	NA	NA	NA	NA
A/Waikato/7/2000	EPI37410	EPI_ISL_5537	Oceania / New Zealand / Waikato	Human	2000-09-08	329	unassigned	unassigned	1.28711	-3.75977	-1.81348	c2	2000NH	0.657294	NA	NA	NA	NA	NA
A/Waikato/6/2000	EPI38398	EPI_ISL_5589	Oceania / New Zealand / Waikato	Human	2000-09-08	329	unassigned	unassigned	1.35742	-3.86914	-2	c2	2000NH	0.655648	NA	NA	NA	NA	NA
A/Waikato/9/2000	EPI38417	EPI_ISL_5590	Oceania / New Zealand / Waikato	Human	2000-09-19	329	unassigned	unassigned	0.527344	-4.18359	-1.80566	c2	2000NH	0.446755	NA	NA	NA	NA	NA
A/Waikato/20/2000	EPI38436	EPI_ISL_5591	Oceania / New Zealand / Waikato	Human	2000-10-09	329	unassigned	unassigned	0.505371	-3.85547	-1.9873	c2	2000NH	0.2345	NA	NA	NA	NA	NA
A/Waikato/15/2000	EPI39194	EPI_ISL_5631	Oceania / New Zealand / Waikato	Human	2000-09-21	329	unassigned	unassigned	0.505371	-3.85547	-1.9873	c2	2000NH	0.2345	NA	NA	NA	NA	NA
A/Dunedin/3/2000	EPI39175	EPI_ISL_5630	Oceania / New Zealand / Dunedin	Human	2000-02-21	329	unassigned	unassigned	1.2959	-3.85938	-1.94629	c2	2000SH	0.252996	NA	NA	NA	NA	NA
A/Waikato/16/2000	EPI39208	EPI_ISL_5632	Oceania / New Zealand / Waikato	Human	2000-09-27	329	unassigned	unassigned	0.527344	-4.18359	-1.80566	c2	2000NH	0.446755	NA	NA	NA	NA	NA
A/Waikato/17/2000	EPI39227	EPI_ISL_5633	Oceania / New Zealand / Waikato	Human	2000-09-22	329	unassigned	unassigned	0.505371	-3.85547	-1.9873	c2	2000NH	0.2345	NA	NA	NA	NA	NA
A/Wellington/28/2000	EPI39246	EPI_ISL_5634	Oceania / New Zealand / Wellington	Human	2000	329	unassigned	unassigned	1.35742	-3.86914	-2	c2	1999NH	0.207977	NA	NA	NA	NA	NA
A/Wellington/26/2000	EPI40410	EPI_ISL_5695	Oceania / New Zealand / Wellington	Human	2000	329	unassigned	unassigned	0.505371	-3.85547	-1.9873	c2	1999NH	0.646499	NA	NA	NA	NA	NA
A/Wellington/30/2000	EPI40429	EPI_ISL_5696	Oceania / New Zealand / Wellington	Human	2000-11-25	329	unassigned	unassigned	0.505371	-3.85547	-1.9873	c2	2000NH	0.2345	NA	NA	NA	NA	NA
A/Sao Paulo/93/2000	EPI843283	EPI_ISL_235406	South America / Brazil	Human	2000-05-25	329	unassigned	unassigned	1.35742	-3.86914	-2	c2	2000SH	0.3064	NA	NA	NA	NA	NA
A/Western Australia/2/2000	EPI44461	EPI_ISL_6169	Oceania / Australia / Western Australia / Spearwood	Human	2000-09-20	329	unassigned	unassigned	0.505371	-3.85547	-1.9873	c2	2000NH	0.2345	NA	NA	NA	NA	NA
A/Western Australia/3/2000	EPI44480	EPI_ISL_6170	Oceania / Australia / Western Australia / Margaret River	Human	2000-09-12	329	unassigned	unassigned	0.505371	-3.85547	-1.9873	c2	2000NH	0.2345	NA	NA	NA	NA	NA
A/Western Australia/8/2000	EPI44499	EPI_ISL_6171	Oceania / Australia / Western Australia / Kalgoorlie	Human	2000-10-17	329	unassigned	unassigned	0.505371	-3.85547	-1.9873	c2	2000NH	0.2345	NA	NA	NA	NA	NA
A/Western Australia/11/2000	EPI44518	EPI_ISL_6172	Oceania / Australia / Western Australia / Esperance	Human	2000-10-14	329	unassigned	unassigned	0.505371	-3.85547	-1.9873	c2	2000NH	0.2345	NA	NA	NA	NA	NA
A/New South Wales/25/2000	EPI45506	EPI_ISL_6224	Oceania / Australia / New South Wales / Sydney	Human	2000	329	unassigned	unassigned	0.505371	-3.85547	-1.9873	c2	1999NH	0.646499	NA	NA	NA	NA	NA
A/New South Wales/27/2000	EPI45525	EPI_ISL_6225	Oceania / Australia / New South Wales / Sydney	Human	2000	329	unassigned	unassigned	0.505371	-3.85547	-1.9873	c2	1999NH	0.646499	NA	NA	NA	NA	NA
A/New South Wales/28/2000	EPI45544	EPI_ISL_6226	Oceania / Australia / New South Wales / Sydney	Human	2000	329	unassigned	unassigned	0.505371	-3.85547	-1.9873	c2	1999NH	0.646499	NA	NA	NA	NA	NA
A/New South Wales/29/2000	EPI45563	EPI_ISL_6227	Oceania / Australia / New South Wales / Sydney	Human	2000	329	unassigned	unassigned	0.505371	-3.85547	-1.9873	c2	1999NH	0.646499	NA	NA	NA	NA	NA
A/New South Wales/36/2000	EPI45582	EPI_ISL_6228	Oceania / Australia / New South Wales / Sydney	Human	2000	329	unassigned	unassigned	0.549316	-3.84961	-1.98242	c2	1999NH	0.602937	NA	NA	NA	NA	NA
A/Waikato/8/2000	EPI45791	EPI_ISL_6239	Oceania / New Zealand / Waikato	Human	2000-09-18	329	unassigned	unassigned	1.37695	-3.86914	-1.9834	c2	2000NH	0.677509	NA	NA	NA	NA	NA
A/New South Wales/33/2000	EPI45924	EPI_ISL_6246	Oceania / Australia / New South Wales / Sydney	Human	2000	329	unassigned	unassigned	0.126465	-4.20703	-1.96094	c2	1999NH	1.07335	NA	NA	NA	NA	NA
A/Canterbury/75/2000	EPI46212	EPI_ISL_6334	Oceania / New Zealand / Canterbury	Human	2000-09-14	329	unassigned	unassigned	0.505371	-3.85547	-1.9873	c2	2000NH	0.2345	NA	NA	NA	NA	NA
A/Western Australia/10/2000	EPI46421	EPI_ISL_6345	Oceania / Australia / Western Australia / Fremantle	Human	2000-10-19	329	unassigned	unassigned	0.505371	-3.85547	-1.9873	c2	2000NH	0.2345	NA	NA	NA	NA	NA
A/Western Australia/12/2000	EPI46440	EPI_ISL_6346	Oceania / Australia / Western Australia	Human	2000-10-11	329	unassigned	unassigned	0.508789	-3.85156	-1.98535	c2	2000NH	0.233173	NA	NA	NA	NA	NA
A/New South Wales/32/2000	EPI46611	EPI_ISL_6355	Oceania / Australia / New South Wales / Sydney	Human	2000	329	unassigned	unassigned	0.505371	-3.85547	-1.9873	c2	1999NH	0.646499	NA	NA	NA	NA	NA
A/New South Wales/34/2000	EPI46630	EPI_ISL_6356	Oceania / Australia / New South Wales / Sydney	Human	2000	329	unassigned	unassigned	0.5	-3.85547	-1.97656	c2	1999NH	0.651871	NA	NA	NA	NA	NA
A/New South Wales/35/2000	EPI46649	EPI_ISL_6357	Oceania / Australia / New South Wales / Sydney	Human	2000	329	unassigned	unassigned	0.505371	-3.85547	-1.9873	c2	1999NH	0.646499	NA	NA	NA	NA	NA
A/South Australia/59/2000	EPI46934	EPI_ISL_6372	Oceania / Australia / South Australia	Human	2000	329	unassigned	unassigned	0.505371	-3.85547	-1.9873	c2	1999NH	0.646499	NA	NA	NA	NA	NA
A/South Australia/67/2000	EPI47029	EPI_ISL_6377	Oceania / Australia / South Australia	Human	2000	329	unassigned	unassigned	0.57666	-3.83203	-1.97266	c2	1999NH	0.577168	NA	NA	NA	NA	NA
A/South Australia/62/2000	EPI46953	EPI_ISL_6373	Oceania / Australia / South Australia	Human	2000	329	unassigned	unassigned	1.34082	-3.9043	-2.00195	c2	1999NH	0.191495	NA	NA	NA	NA	NA
A/South Australia/66/2000	EPI47010	EPI_ISL_6376	Oceania / Australia / South Australia	Human	2000	329	unassigned	unassigned	0.424072	-3.86133	-1.88086	c2	1999NH	0.734501	NA	NA	NA	NA	NA
A/South Australia/68/2000	EPI47048	EPI_ISL_6378	Oceania / Australia / South Australia	Human	2000	329	unassigned	unassigned	0.526855	-3.81445	-2.0332	c2	1999NH	0.630537	NA	NA	NA	NA	NA
A/South Australia/71/2000	EPI47067	EPI_ISL_6379	Oceania / Australia / South Australia	Human	2000	329	unassigned	unassigned	1.50391	-3.81641	-2.01367	c2	1999NH	0.361385	NA	NA	NA	NA	NA
A/South Australia/74/2000	EPI47086	EPI_ISL_6380	Oceania / Australia / South Australia	Human	2000	329	unassigned	unassigned	0.538086	-3.96875	-1.63477	c2	1999NH	0.709288	NA	NA	NA	NA	NA
A/South Australia/52/2000	EPI48017	EPI_ISL_6429	Oceania / Australia / South Australia	Human	2000	329	unassigned	unassigned	0.505371	-3.85547	-1.9873	c2	1999NH	0.646499	NA	NA	NA	NA	NA
A/South Australia/76/2000	EPI48036	EPI_ISL_6430	Oceania / Australia / South Australia	Human	2000	329	unassigned	unassigned	0.505371	-3.85547	-1.9873	c2	1999NH	0.646499	NA	NA	NA	NA	NA
A/Queensland/1/2000	EPI48245	EPI_ISL_6441	Oceania / Australia / Queensland / Brisbane	Human	2000-09-15	329	unassigned	unassigned	0.505371	-3.85547	-1.9873	c2	2000NH	0.2345	NA	NA	NA	NA	NA
A/Queensland/4/2000	EPI48264	EPI_ISL_6442	Oceania / Australia / Queensland / Toowoomba	Human	2000-09-05	329	unassigned	unassigned	1.36816	-3.87695	-2.00391	c2	2000NH	0.665445	NA	NA	NA	NA	NA
[truncated: 149,786 more rows]
